# Supplementary material for: The Micro-RNA Cargo of Extracellular Vesicles Released by Human Adipose Tissue-Derived Mesenchymal Stem Cells Is Modified by Obesity
Source: Front Cell Dev Biol. 2021 May 20;9:660851. doi: 10.3389/fcell.2021.660851 (PMC8173369; doi:10.3389/fcell.2021.660851)
Supplement: Supplementary file 2 [file Table_1.xlsx]

## Sheet: miRWalk_miRNA_Targets
mirnaid	refseqid	genesymbol	duplex	start	end	bindingp	energy	seed	accessibility	au	phylopstem	phylopflank	me	number_of_pairings	binding_region_length	longest_consecutive_pairings	position	validated	TargetScan	miRDB
hsa-miR-1291	NM_152464	TMEM199	.(((.(((((((((((((......&)))))..)))))))).))).	2714	2734	0.953846	-23.7	1	0.0290789	0.529	0.487985	0.120649	-7.91236	16	20	8	3UTR		0	0
hsa-miR-1291	NM_152594	SPRED1	.(((.(((.(((((((((((....&)))))).)))))))).))).	5350	5370	0.953846	-20.8	1	0.00242252	0.676	2.1386	1.25327	-8.96875	17	20	8	3UTR		0	0
hsa-miR-1291	NM_017797	BTBD2	((((((((.((((...((((((((&)))))))).))))..)))..........))))).	1769	1803	0.953846	-27.2	1	5.93414e-07	0.309	3.78193	4.56405	-6.8193	20	34	8	3UTR		0	0
hsa-miR-1291	NM_006246	PPP2R5E	..(((.(((((.(((((.(((((.&))))).)))))))))).))).	3539	3560	0.953846	-20.9	1	0.00349946	0.588	3.38449	2.85446	-10.2048	18	21	10	3UTR		0	0
hsa-miR-1291	NM_001015048	BAG5	.((((((...((((((((((....&)))))))))))))))).	4374	4391	0.953846	-20.8	1	0.038708	0.603	3.95752	3.24733	-8.40586	16	17	16	3UTR		0	0
hsa-miR-1291	NM_001256760	HTR2C	.((((((((.((((((((((((.(&).))))))...))..)))).))).))))).	3505	3535	0.961538	-22.2	1	0.00453555	0.588	0	0	-5.03583	21	30	6	3UTR		0	0
hsa-miR-1291	NM_001256761	HTR2C	.((((((((.((((((((((((.(&).))))))...))..)))).))).))))).	3319	3349	0.961538	-22.2	1	0.00453555	0.588	0	0	-5.03583	21	30	6	3UTR		0	0
hsa-miR-1291	NM_001278191	TPM3	(((((((((..(.((((((.((..&))))))))).))))))))).	1874	1894	0.961538	-23.3	1	4.3578e-07	0.588	0.147716	0.501865	-9.29399	18	20	9	3UTR		0	0
hsa-miR-1291	NM_001284234	GTDC1	(((((((..((((.(((((.....&)))))...)))).))))))).	5280	5301	0.961538	-24.4	1	0.000901163	0.632	0.456706	0.457226	-8.16444	16	21	7	3UTR		0	1
hsa-miR-1291	NM_001287431	ARFIP1	((((((((((((((((((......&))))))))))).........))))))).	1585	1613	0.961538	-25.4	1	0.00353588	0.618	2.16366	1.98785	-3.93757	18	28	11	3UTR		0	0
hsa-miR-1291	NM_001291873	IGF2BP2	(((((((((((((((((((((...&)))))))))..............................))).)))).))))).	3613	3667	0.961538	-23	1	0.00777769	0.5	3.93998	4.92447	-3.93757	21	54	9	3UTR		0	0
hsa-miR-1291	NM_001294139	PRAMEF1	.(((((.(..((.((((((((...&.)))))))))).....).))))).	1007	1036	0.961538	-23.6	1	2.01105e-06	0.456	-0.467398	-0.398134	-8.92504	16	24	10	3UTR		0	0
hsa-miR-1291	NM_001300842	SLC10A7	..(((.(((((((...((.(((..&))).))..))))))).))).	1596	1616	0.961538	-19.3	1	0.00193442	0.618	0.814117	0.631177	-8.6833	15	20	7	3UTR		0	0
hsa-miR-1291	NM_001308229	C3orf33	.(((((((((((((((.(((((..&)))))))))))))))....))))).	1210	1235	0.961538	-21.9	1	0.00302477	0.691	1.24953	2.70322	-3.79332	20	25	15	3UTR		0	0
hsa-miR-1291	NM_001308315	TSPAN2	..(((((((((..(((((((((((&)))).))).)))).))))))).)).	1151	1176	0.961538	-22.5	1	0.0349016	0.632	0.532271	0.252513	-9.59293	20	25	7	3UTR		0	0
hsa-miR-1291	NM_001308316	TSPAN2	..(((((((((..(((((((((((&)))).))).)))).))))))).)).	1142	1167	0.961538	-22.5	1	0.0349016	0.632	0.282877	0.239545	-9.59293	20	25	7	3UTR		0	0
hsa-miR-1291	NM_001318139	MRTFA	(((((((((((...((((......&.))))..))))))))))).	3329	3353	0.961538	-29.1	1	0.000285107	0.456	1.9489	1.93654	-9.43035	15	19	11	3UTR		0	0
hsa-miR-1291	NM_145690	YWHAZ	(((((((...(((((.(((.((((&.))))))))))))..))))))).	1109	1142	0.961538	-25.6	1	6.49922e-05	0.588	-0.165569	-0.128179	-8.78315	19	23	12	3UTR		0	0
hsa-miR-1291	NM_152261	TMEM263	...((((((((((((....((...&))...)))))))))))).	1790	1808	0.961538	-22.4	1	0.00774541	0.706	0.392048	0.0429399	-6.74759	14	18	12	3UTR		0	0
hsa-miR-1291	NM_152860	SP7	((.((((((.(((((((((.(((.&))).)))..)))))))))))).)).	1914	1939	0.961538	-27.1	1	2.85094e-05	0.441	4.12879	3.97514	-6.73762	20	25	12	3UTR		0	0
hsa-miR-1291	NM_153456	HS6ST3	.((((((((((((((((..(((((&.)))))..))))))))........)))))))).	7438	7499	0.961538	-30	1	2.21545e-05	0.5	-0.136224	-0.106474	-3.79332	21	33	8	3UTR		0	0
hsa-miR-1291	NM_153611	CYB561A3	...((((((..(((((.(((((((&))))))).))))).)))))).	2173	2194	0.961538	-26.3	1	2.95616e-05	0.441	1.62347	2.71654	-10.5818	18	21	7	3UTR		0	1
hsa-miR-1291	NM_173657	C3orf33	.(((((((((((((((.(((((..&)))))))))))))))....))))).	1337	1362	0.961538	-21.9	1	0.00302477	0.691	2.6986	1.88529	-3.79332	20	25	15	3UTR		0	0
hsa-miR-1291	NM_175900	C16orf54	.(((((.((.(((((((((((...&.)))))))))))..))..))))).	2256	2293	0.961538	-27.4	1	9.8308e-06	0.471	1.62101	0.758907	-6.57952	18	24	11	3UTR		0	0
hsa-miR-1291	NM_181786	ZNF875	.((((((((.((.((.((((((((&))))))))))))...))))).))).	2466	2491	0.961538	-26	1	2.50927e-05	0.441	-0.294909	0.0251629	-6.55801	20	25	12	3UTR		0	0
hsa-miR-1291	NM_198189	COPS8	.((((((.((((....((((((((&))))))))))))..)))))).	1364	1385	0.961538	-24.8	1	9.96964e-07	0.603	0.126424	0.521794	-9.22143	18	21	12	3UTR		0	0
hsa-miR-1291	NM_199487	UQCC1	.((((((..(((..(((((((((.&)))))))))..........)))..)).)))).	893	925	0.961538	-24.8	1	0.000149071	0.471	0.206762	0.516168	-9.30932	18	32	9	3UTR		0	0
hsa-miR-1291	NM_206907	PRKAA1	.(((((((((.(((((.((((((.&)))))).)))))))).)))))).	3823	3846	0.961538	-23.9	1	0.0118752	0.662	4.92598	4.71343	-6.6181	20	23	8	3UTR		0	0
hsa-miR-1291	XM_011510659	TMEM37	(.(((((..(((.((((((((((.&)))))))..))).)))))))).).	1524	1548	0.961538	-24.7	1	3.9151e-05	0.441	0	0	-9.76041	19	24	8	3UTR		0	0
hsa-miR-1291	XM_017018142	TMEM135	...(((((((((.((((((.((((&))))...)))))).)))))............)))).	2297	2333	0.961538	-21.6	1	0.00314138	0.676	0	0	-7.80367	19	36	6	3UTR		0	0
hsa-miR-1291	XM_017028891	RANBP1	((((((((.(((((((((((((((&)))))).).))))))))))))...................)))).	1412	1457	0.961538	-24.7	1	0.00204151	0.574	0	0	-4.99396	23	45	12	3UTR		0	0
hsa-miR-1291	NM_014646	LPIN2	.(((((((((((((((.((((...&.))))))))))...))))))))).	3301	3356	0.961538	-29.7	1	0.00151526	0.412	2.79927	2.2105	-3.79332	19	24	10	3UTR		0	0
hsa-miR-1291	NM_014740	EIF4A3	.((((((((.(((((((((((...&.)))))))).))).))).))))).	2248	2285	0.961538	-27	1	0.00331964	0.529	3.8292	3.72961	-5.03583	19	24	8	3UTR		0	0
hsa-miR-1291	NM_014863	CHST15	.(((((((..((((((((((((((&.)))).))).)).)))))....))))))).	2510	2554	0.961538	-27.3	1	0.000974852	0.382	1.57706	1.73665	-6.09222	21	30	7	3UTR		0	0
hsa-miR-1291	NM_015035	ZHX3	.(((((((((((((((((.((((.&)))).)))))........)))))))).)))).	6744	6776	0.961538	-27.8	1	0.00236626	0.426	1.35247	1.51057	-3.79332	21	32	8	3UTR		0	0
hsa-miR-1291	NM_018010	IFT57	.((((((..((((((((((((((.&)))).)))))))))).))).))).	2704	2728	0.961538	-24.3	1	0.00116456	0.574	6.05822	4.05076	-7.16335	20	24	10	3UTR		0	0
hsa-miR-1291	NM_018086	FIGN	.((((.(((.((((((((.(((((&)))))...))))))))))).)))).	7763	7788	0.961538	-24.7	1	0.000103224	0.618	4.65379	4.79389	-6.93679	20	25	11	3UTR		0	0
hsa-miR-1291	NM_020128	MDM1	.((.((((.(((.((.(((((.((&.)).))))).)).))))))).)).	1080	1116	0.961538	-23.2	1	2.79793e-07	0.441	0.182124	0.0854263	-9.40392	18	24	7	3UTR		0	0
hsa-miR-1291	NM_020367	PARP11	...((((..(.((((((((((((.&)))))))))))).)..)))).	1655	1676	0.961538	-26.1	1	1.09675e-05	0.559	-0.069185	-0.0319177	-12.7093	17	21	12	3UTR		0	0
hsa-miR-1291	NM_020801	ARRDC3	...((((..((((((((((((...&))))).)))))))..)))).	2391	2411	0.961538	-19.8	1	0.0135658	0.647	2.58865	3.14563	-9.88456	16	20	7	3UTR		0	0
hsa-miR-1291	NM_021115	SEZ6L	(((((((...(((((((((((((.&)))))))))))))....)).............))))).	4875	4913	0.961538	-27.1	1	5.07649e-05	0.574	-0.147068	-0.315634	-8.55011	20	38	13	3UTR		0	0
hsa-miR-1291	NM_022644	CSH2	.(((((((((((((((.(((((((&.)))))))...)))).....)))))))).))).	622	670	0.961538	-29.2	1	0.000248808	0.515	2.29346	2.52238	-3.79332	22	33	8	3UTR		0	0
hsa-miR-1291	NM_023013	PRAMEF1	.(((((.(..((.((((((((...&.)))))))))).....).))))).	1697	1726	0.961538	-23.6	1	2.01105e-06	0.456	-0.467398	-0.398134	-8.92504	16	24	10	3UTR		0	0
hsa-miR-1291	NM_024494	WNT2B	.(((((((((((...(((((....&))))).))))))))))).	4513	4531	0.961538	-26.2	1	2.81216e-05	0.559	0.37512	0.457	-6.67474	16	18	11	3UTR		0	0
hsa-miR-1291	NM_024602	HECTD3	..((((((((((.(.((.(((((.&)))))...)).).)))))))))).	2771	2795	0.961538	-24.1	1	0.00017622	0.426	4.01246	4.18959	-6.98158	18	24	10	3UTR		0	0
hsa-miR-1291	NM_024835	GGNBP2	.((((((((((((((((((((...&))).).))))))))))).).)))).	2548	2573	0.961538	-23	1	0.000858961	0.515	3.27669	3.50843	-3.79332	20	25	11	3UTR		0	0
hsa-miR-1291	NM_002356	MARCKS	.(((((((((((((((...(((..&.))).))))))))))))))).	3660	3685	0.961538	-20.5	1	0.0550627	0.691	0.40604	0.489939	-3.79332	18	21	15	3UTR		0	0
hsa-miR-1291	NM_002527	NTF3	.((.(((((..((((.(.((((..&)))).).))))..))))))).	1017	1038	0.961538	-19.6	1	0.000454492	0.588	2.02668	2.21621	-11.1257	16	21	7	3UTR		0	0
hsa-miR-1291	NM_002829	PTPN3	.((((..((.((.((((((((...&))))))))))...))..)))).	5036	5058	0.961538	-24.4	1	0.00284488	0.471	3.91503	3.79659	-9.76961	16	22	10	3UTR		0	0
hsa-miR-1291	NM_003286	TOP1	.((((((((((((((((((.((((&)))).)).)))))..))))))))))).	2904	2931	0.961538	-24.6	1	0.0210847	0.721	4.49193	4.03556	-3.79332	22	27	11	3UTR		0	0
hsa-miR-1291	NM_003730	RNASET2	..((((((.((.(((.(((((((.&)))))))))))))))))).	2792	2811	0.961538	-26.3	1	4.65991e-07	0.544	-0.373944	-0.125143	-9.59324	18	19	18	3UTR		0	0
hsa-miR-1291	NM_003750	EIF3A	((((((((.(((...(((((.((.&)).))))).)))...)))))))).	5663	5687	0.961538	-21.9	1	0.00170756	0.588	6.94861	6.00564	-7.87538	18	24	8	3UTR		0	0
hsa-miR-1291	NM_003818	CDS2	(.(((((((((..(((..(((((.&)))))..)))..))))))))).).	5170	5194	0.961538	-26.3	1	0.00126759	0.5	0.270134	-0.101456	-9.73718	18	24	9	3UTR		0	0
hsa-miR-1291	NM_004432	ELAVL2	(((((((..((.....(((((...&)))))...))..))))))).	2067	2087	0.961538	-21.1	1	0.00833706	0.618	3.05594	2.45647	-13.7689	14	20	7	3UTR		0	0
hsa-miR-1291	NM_004738	VAPB	(((.(..(((((((((((((((((&))))))....).))))))))))..).))).	1419	1449	0.961538	-23.8	1	0.0986876	0.426	0.726158	0.383288	-10.4142	21	30	10	3UTR		0	0
hsa-miR-1291	NM_005725	TSPAN2	..(((((((((..(((((((((((&)))).))).)))).))))))).)).	1226	1251	0.961538	-22.5	1	0.0349016	0.632	0.362684	0.190102	-9.59293	20	25	7	3UTR		0	0
hsa-miR-1291	NM_006251	PRKAA1	.(((((((((.(((((.((((((.&)))))).)))))))).)))))).	3778	3801	0.961538	-23.9	1	0.0118752	0.662	4.91586	4.8526	-6.6181	20	23	8	3UTR		0	0
hsa-miR-1291	NM_006370	VTI1B	((((((((..(.(((((((((.((&))))))))))).)..)...))))))).	2896	2923	0.961538	-25.1	1	3.75858e-06	0.441	-0.0224163	0.338691	-9.58327	20	27	11	3UTR		0	0
hsa-miR-1291	NM_006811	SERINC3	.(((((((((((((((........&))))))))))...))))).	3089	3108	0.961538	-23.3	1	7.12237e-06	0.662	3.26472	2.3227	-3.79332	15	19	10	3UTR		0	0
hsa-miR-1291	NM_007152	ZNF195	((((((((((.(((((........&))))).)))))))))).	2572	2589	0.961538	-22.6	1	0.000791721	0.529	-0.50712	-0.722391	-6.76235	15	17	10	3UTR		0	0
hsa-miR-1291	NM_012231	PRDM2	(((((((..((((((.((......&)).))))))..)).))))).	6446	6466	0.961538	-24.5	1	4.25572e-08	0.368	0.748535	-0.0194168	-7.54065	15	20	6	3UTR		0	0
hsa-miR-1291	NM_012311	KIN	.((((((((((((((((..((((.&))))..).....))).)))))))).)))).	5154	5184	0.961538	-24.2	1	0.0126149	0.647	3.57223	3.53665	-3.79332	20	30	8	3UTR		0	0
hsa-miR-1291	NM_014447	ARFIP1	((((((((((((((((((......&))))))))))).........))))))).	1489	1517	0.961538	-25.4	1	0.00353588	0.618	2.16366	1.98785	-3.93757	18	28	11	3UTR		0	0
hsa-miR-1291	NM_001319662	TMEM263	...((((((((((((....((...&))...)))))))))))).	1928	1946	0.961538	-22.4	1	0.00774541	0.706	0.392048	0.0429399	-6.74759	14	18	12	3UTR		0	0
hsa-miR-1291	NM_001319663	TMEM263	...((((((((((((....((...&))...)))))))))))).	1888	1906	0.961538	-22.4	1	0.00774541	0.706	0.816752	0.334288	-6.74759	14	18	12	3UTR		0	0
hsa-miR-1291	NM_001319664	TMEM263	...((((((((((((....((...&))...)))))))))))).	1906	1924	0.961538	-22.4	1	0.00774541	0.706	0.816752	0.334288	-6.74759	14	18	12	3UTR		0	0
hsa-miR-1291	NM_001322815	SOD2	((((...(((((((..((((((((&)))))))).))))))).)))).	8679	8701	0.961538	-28.2	1	0.00761716	0.676	0.320971	0.079554	-12.4698	19	22	8	3UTR		0	0
hsa-miR-1291	NM_001329761	ZNF875	.((((((((.((.((.((((((((&))))))))))))...))))).))).	2273	2298	0.961538	-26	1	2.50927e-05	0.441	-0.294909	0.0251629	-6.55801	20	25	12	3UTR		0	0
hsa-miR-1291	NM_001345917	WDR53	...(((((((((((((((((((..&))))))))))))........)))).))).	1847	1876	0.961538	-29	1	0.0107511	0.618	0.272259	0.0405572	-6.51454	19	29	12	3UTR		0	0
hsa-miR-1291	NM_001351472	ELAVL2	(((((((..((.....(((((...&)))))...))..))))))).	2064	2084	0.961538	-21.1	1	0.00833706	0.618	3.36698	2.58018	-13.7689	14	20	7	3UTR		0	0
hsa-miR-1291	NM_001353803	ZNF875	.((((((((.((.((.((((((((&))))))))))))...))))).))).	2301	2326	0.961538	-26	1	2.50927e-05	0.441	-0.294909	0.0251629	-6.55801	20	25	12	3UTR		0	0
hsa-miR-1291	NM_001355213	OR10D3	..((((((((((((((.(((((((&))))))).))))))))))...................)))).	3404	3446	0.961538	-25.3	1	9.99873e-05	0.544	-0.0508208	-0.0158519	-4.957	21	42	10	3UTR		0	0
hsa-miR-1291	NM_001384323	ZHX3	.(((((((((((((((((.((((.&)))).)))))........)))))))).)))).	7276	7308	0.961538	-27.8	1	0.00236626	0.426	3.01413	2.08839	-3.79332	21	32	8	3UTR		0	0
hsa-miR-1291	NM_001664	RHOA	.((((((((.((..(((((.(((.&.))).)).)))..))..)))))))).	1106	1144	0.961538	-24.5	1	0.000883434	0.515	6.75669	5.05004	-7.1818	18	26	8	3UTR		0	0
hsa-miR-1291	NM_001762	CCT6A	.(((((((.((((...((((((((&)))))....)))....))))))).)))).	2518	2547	0.961538	-24.9	1	8.03713e-05	0.574	0.551381	0.25174	-6.67505	19	29	7	3UTR		0	0
hsa-miR-1291	NM_001775	CD38	.((((((((((((((((.......&))))))))..)))))))).	3216	3235	0.961538	-27.6	1	0.00152666	0.441	0.506933	-0.195265	-3.79332	16	19	8	3UTR		0	0
hsa-miR-1291	NM_000655	SELL	.(((((((((((((((.((((.((&)))))).)))))))))..)))))).	1944	1969	0.961538	-21.5	1	0.000783096	0.574	1.66585	2.22325	-3.79332	21	25	9	3UTR		0	0
hsa-miR-1291	NM_000868	HTR2C	.((((((((.((((((((((((.(&).))))))...))..)))).))).))))).	3414	3444	0.961538	-22.2	1	0.00453555	0.588	0	0	-5.03583	21	30	6	3UTR		0	0
hsa-miR-1291	NM_001007	RPS4X	(.(((((((((((...((((((((&.)))).))))..)))))))).))).).	1000	1042	0.961538	-22	1	0.00244235	0.529	5.97319	5.67996	-6.92659	20	27	8	3UTR		0	0
hsa-miR-1291	NM_001009186	CCT6A	.(((((((.((((...((((((((&)))))....)))....))))))).)))).	2383	2412	0.961538	-24.9	1	8.03713e-05	0.574	0.551381	0.25174	-6.67505	19	29	7	3UTR		0	0
hsa-miR-1291	NM_001012329	CTNNBIP1	(((.((((((((((((((((.(((&)))))))).)))))))))))))).	875	899	0.961538	-26.6	1	0.0122791	0.574	-0.0880832	-0.265995	-6.9696	22	24	14	3UTR		0	0
hsa-miR-1291	NM_001025593	ARFIP1	((((((((((((((((((......&))))))))))).........))))))).	1624	1652	0.961538	-25.4	1	0.00353588	0.618	2.16366	1.98785	-3.93757	18	28	11	3UTR		0	0
hsa-miR-1291	NM_001025595	ARFIP1	((((((((((((((((((......&))))))))))).........))))))).	1720	1748	0.961538	-25.4	1	0.00353588	0.618	1.80457	2.58745	-3.93757	18	28	11	3UTR		0	0
hsa-miR-1291	NM_001029998	SLC10A7	..(((.(((((((...((.(((..&))).))..))))))).))).	1485	1505	0.961538	-19.3	1	0.00193442	0.618	1.41752	0.306335	-8.6833	15	20	7	3UTR		0	0
hsa-miR-1291	NM_001031701	NT5DC3	.((((((((((((.((.((((((.&)))))))).))))))..)))))).	3425	3449	0.961538	-24.7	1	0.000423228	0.632	-0.0493767	-0.294729	-4.65016	20	24	8	3UTR		0	0
hsa-miR-1291	NM_001079684	KIAA1191	.((((((.(((((((((.(((.((&)).))).)).))))).)))))))).	2052	2077	0.961538	-23.9	1	0.000128769	0.426	4.61327	4.36247	-6.10696	20	25	8	3UTR		0	0
hsa-miR-1291	NM_001079685	KIAA1191	.((((((.(((((((((.(((.((&)).))).)).))))).)))))))).	2031	2056	0.961538	-23.9	1	0.000128769	0.426	4.92256	4.03011	-6.10696	20	25	8	3UTR		0	0
hsa-miR-1291	NM_001079685	KIAA1191	.(((((((((((((.(........&.).))))).)))))))).	2292	2339	0.961538	-23.8	1	2.1436e-05	0.5	3.18955	4.27199	-4.52877	14	18	8	3UTR		0	0
hsa-miR-1291	NM_001134450	TMEM130	(.((((((.(((.(((((((((((&))))))).......)))).))))))))).).	1497	1528	0.961538	-25.6	1	0.000186132	0.471	-0.295297	-0.0475338	-7.44677	21	31	9	3UTR		0	0
hsa-miR-1291	NM_001135610	PRDM2	(((((((..((((((.((......&)).))))))..)).))))).	1243	1263	0.961538	-24.5	1	4.25572e-08	0.368	0.748535	-0.0194168	-7.54065	15	20	6	3UTR		0	0
hsa-miR-1291	NM_001135700	YWHAZ	(((((((...(((((.(((.((((&.))))))))))))..))))))).	1095	1128	0.961538	-25.6	1	6.49922e-05	0.588	-0.133405	-0.149755	-8.78315	19	23	12	3UTR		0	0
hsa-miR-1291	NM_001135701	YWHAZ	(((((((...(((((.(((.((((&.))))))))))))..))))))).	1144	1177	0.961538	-25.6	1	6.49922e-05	0.588	-0.240615	-0.0156077	-8.78315	19	23	12	3UTR		0	0
hsa-miR-1291	NM_001144884	SLC30A7	.((((((((((((((((..((((.&))))..)).....))))))))).))))).	1346	1375	0.961538	-24.3	1	0.00151898	0.544	1.16618	1.64916	-3.79332	20	29	9	3UTR		0	0
hsa-miR-1291	NM_001164098	VCAN	.((((((((((((((((((((...&)))))))..................))))))))....))))).	5304	5347	0.961538	-23.1	1	0.00133804	0.588	3.52909	2.85969	-3.79332	20	43	8	3UTR		0	0
hsa-miR-1291	NM_001184773	SEZ6L	(((((((...(((((((((((((.&)))))))))))))....)).............))))).	4872	4910	0.961538	-27.1	1	5.07649e-05	0.574	-0.147068	-0.315634	-8.55011	20	38	13	3UTR		0	0
hsa-miR-1291	NM_001184774	SEZ6L	(((((((...(((((((((((((.&)))))))))))))....)).............))))).	4842	4880	0.961538	-27.1	1	5.07649e-05	0.574	-0.147068	-0.315634	-8.55011	20	38	13	3UTR		0	0
hsa-miR-1291	NM_001184776	SEZ6L	(((((((...(((((((((((((.&)))))))))))))....)).............))))).	4650	4688	0.961538	-27.1	1	5.07649e-05	0.574	-0.147068	-0.315634	-8.55011	20	38	13	3UTR		0	0
hsa-miR-1291	NM_001184777	SEZ6L	(((((((...(((((((((((((.&)))))))))))))....)).............))))).	4647	4685	0.961538	-27.1	1	5.07649e-05	0.574	-0.147068	-0.315634	-8.55011	20	38	13	3UTR		0	0
hsa-miR-1291	NM_001195677	VAPB	(((.(..(((((((((((((((((&))))))....).))))))))))..).))).	1057	1087	0.961538	-23.8	1	0.0986876	0.426	0.726158	0.383288	-10.4142	21	30	10	3UTR		0	0
hsa-miR-1291	NM_001204446	AP5S1	(((((((((((((((....(((((&))))))))))))))).))))).	2384	2406	0.961538	-24.6	1	0.0718186	0.485	0	0	-4.17062	20	22	15	3UTR		0	0
hsa-miR-1291	NM_001240	CCNT1	..(((((((..((((((..(((((&)))))....)))))).))))))).	6542	6566	0.961538	-21.2	1	1.33021e-06	0.471	0	0	-9.02428	18	24	7	3UTR		0	0
hsa-miR-1291	NM_153446	B4GALNT2	(((.((((..(((((.((((((((&)))))))).)))))..)))).))).	4702	4727	0.969231	-27.4	1	0.000181267	0.618	0.228198	0.148064	-9.50154	20	25	8	3UTR		0	0
hsa-miR-1291	NM_016426	GTSE1	.((((...((((..(((((((...&))))))).)))))))).	2373	2390	0.969231	-22.9	1	0.00103558	0.5	0.361142	-0.0376763	-11.6976	15	17	8	3UTR		0	0
hsa-miR-1291	NM_018075	ANO10	.(((((((.(((.(((((((((((&))))))))).........)).)))......))))))).	2826	2864	0.969231	-24.7	1	2.2302e-06	0.397	2.84582	2.47673	-6.13885	21	38	9	3UTR		0	0
hsa-miR-1291	NM_007042	RPP14	...((((((((.....(((((...&))))))))))))).	2774	2788	0.969231	-22.8	1	0.0036327	0.5	0.0710751	0.0380384	-12.9758	13	14	13	3UTR		0	1
hsa-miR-1291	NM_001348713	HTD2	...((((((((.....(((((...&))))))))))))).	2774	2788	0.969231	-22.8	1	0.0036327	0.5	0.0710751	0.0380384	-12.9758	13	14	13	3UTR		0	0
hsa-miR-1291	NM_001348714	HTD2	...((((((((.....(((((...&))))))))))))).	2676	2690	0.969231	-22.8	1	0.0036327	0.5	0.0710751	0.0380384	-12.9758	13	14	13	3UTR		0	0
hsa-miR-1291	NM_001384369	NRM	.((((((((((((((.(((((.((&)).)))))))))...........)))....))))))).	1163	1201	0.969231	-23.7	1	3.35455e-06	0.412	2.78126	1.83117	-4.02637	21	38	9	3UTR		0	0
hsa-miR-1291	NM_001159387	B4GALNT2	(((.((((..(((((.((((((((&)))))))).)))))..)))).))).	4289	4314	0.969231	-27.4	1	0.000181267	0.618	0.228198	0.148064	-9.50154	20	25	8	3UTR		0	0
hsa-miR-1291	NM_001199673	CALU	(((((((((((....((((.((((&))))))))......))))))))))).	1511	1537	0.969231	-29.4	1	0.000504529	0.559	5.02081	5.09161	-10.1658	19	26	11	3UTR		0	0
hsa-miR-1291	NM_001256725	USP39	..((((((.((((((.(.((....&.)).))))))))))))).	1773	1806	0.974359	-21.7	1	3.89647e-05	0.5	-0.20225	-0.0517374	-6.24644	15	18	13	3UTR		0	0
hsa-miR-1291	NM_001278141	NBPF12	.((((((((((..(((..(((((.&)))))..)))........................))))))).))).	6438	6484	0.974359	-23.1	1	0.00126566	0.441	0.218335	0.121114	-8.42926	18	46	7	3UTR		0	0
hsa-miR-1291	NM_001287335	KIAA1191	.(((((((((((((.(........&.).))))).)))))))).	2026	2073	0.974359	-23.8	1	2.1436e-05	0.5	4.40304	3.9412	-4.52877	14	18	8	3UTR		0	0
hsa-miR-1291	NM_001303058	TMED4	.((((..((.(.(((((((((.((&.))...))))))))).)..))..)))).	1343	1389	0.974359	-23.7	1	5.11151e-05	0.412	3.87849	4.89549	-11.8273	18	28	9	3UTR		0	0
hsa-miR-1291	NM_001303060	TMED4	.((((..((.(.(((((((((.((&))...))))))))).)..))..)))).	1585	1612	0.974359	-23.3	1	5.11151e-05	0.412	1.01697	1.48178	-11.8273	18	27	9	3UTR		0	0
hsa-miR-1291	NM_001317406	SLC6A11	(((((((((((((((.((......&)).))))))))))))))).	4836	4855	0.974359	-33.9	1	0.00210889	0.441	-0.201287	-0.469546	-4.17062	17	19	15	3UTR		0	1
hsa-miR-1291	NM_138439	FLYWCH2	((((((((...((((.((.((...&.)).)).)))))))))))).	818	852	0.974359	-21.9	1	6.45152e-06	0.5	-0.434684	-0.359772	-9.29429	16	20	12	3UTR		0	0
hsa-miR-1291	NM_152375	KLHDC7A	(((((((((((((((.(((((...&.))))).)))))...........)))))))))).	4688	4748	0.974359	-34.1	1	0.000438343	0.471	0.0116913	-0.201628	-4.17062	20	34	10	3UTR		0	1
hsa-miR-1291	NM_152751	BEND7	.(((((((((((..(((((((...&)))))))...)))........................))))).))).	2632	2679	0.974359	-25	1	0.00255953	0.471	0.0556621	-0.320489	-5.9393	18	47	7	3UTR		0	0
hsa-miR-1291	NM_198443	NRN1L	.(((((((.(((..(..(.((((.&.)))).)..).)))))))))).	562	601	0.974359	-21.9	1	1.10099e-08	0.531	0.498035	0.558575	-7.22873	16	22	10	3UTR		0	0
hsa-miR-1291	XM_011514520	PNPLA1	.((((((((((((((((((((...&.)))))))...................))))))))))..))).	3390	3443	0.974359	-27.6	1	0.000167408	0.426	0	0	-3.79332	20	43	10	3UTR		0	0
hsa-miR-1291	NM_014611	MDN1	.(((.((((((((...(((((((.&))))))).))))))))...))).	18272	18295	0.974359	-27.5	1	2.80908e-07	0.529	0.786156	0.608165	-9.7377	18	23	8	3UTR		0	0
hsa-miR-1291	NM_017414	USP18	(((((((((((((.((((......&))))....)))))))).........................))))).	1455	1502	0.974359	-22.7	1	7.32322e-05	0.382	-0.242867	-0.338928	-4.79441	17	47	8	3UTR		0	0
hsa-miR-1291	NM_020648	TWSG1	.((...((((((((((.((((((.&)))))).))))))))))...)).	2675	2698	0.974359	-25	1	0.00567866	0.559	-0.102113	0.118143	-12.8453	18	23	10	3UTR		0	0
hsa-miR-1291	NM_021064	H2AC11	(((((((((..(((((((......&)).)))))))))))))).	472	490	0.974359	-24.2	1	1.18464e-06	0.5	0	0	-8.00486	16	18	14	3UTR	MIRT367325	0	0
hsa-miR-1291	NM_022037	TIA1	...((((((((((((((((.(((.&))).))))))))).)....)))))).	2920	2946	0.974359	-21.1	1	0.000178267	0.603	2.96808	2.70024	-6.51454	19	26	9	3UTR		0	0
hsa-miR-1291	NM_002285	AFF3	...(((((((((.(.((.(((((.&))).)).)).).))))))))).	8600	8622	0.974359	-23.8	1	1.05932e-11	0.515	3.32826	3.33605	-8.53912	17	22	9	3UTR		0	0
hsa-miR-1291	NM_005297	MCHR1	..((((((((((.((....((((.&))))....)).)).)))))))).	1247	1270	0.974359	-23.3	1	3.28299e-06	0.382	0.311923	0.45341	-6.47918	16	23	8	3UTR		0	0
hsa-miR-1291	NM_006830	UQCR11	...((((((((((((((.......&))))...)))))))))).	665	683	0.974359	-21.8	1	0.00013071	0.5	-0.496503	-0.386819	-6.51454	14	18	10	3UTR		0	0
hsa-miR-1291	NM_007318	PSEN1	(((((((..((..((.(((.(((.&)))))))).))..))))))).	3261	3282	0.974359	-24.7	1	2.12696e-08	0.515	0.320212	-0.185099	-12.1766	17	21	8	3UTR		0	0
hsa-miR-1291	NM_001353954	SCN1A	.((((((((((((((....(((..&)))....)))))).)))))))).	9355	9378	0.974359	-23.1	1	5.23457e-05	0.574	3.55206	3.70986	-4.02637	17	23	8	3UTR		0	0
hsa-miR-1291	NM_001363460	CALN1	.(((((((.((((((((((((...&.))))))))))))..))).......................)))).	3039	3096	0.974359	-28.5	1	0.00050114	0.515	-0.199233	0.352188	-4.84971	19	46	12	3UTR		0	0
hsa-miR-1291	NM_001386135	AFF3	...(((((((((.(.((.(((((.&))).)).)).).))))))))).	8683	8705	0.974359	-23.8	1	1.05932e-11	0.515	0	0	-8.53912	17	22	9	3UTR		0	0
hsa-miR-1291	NM_000021	PSEN1	(((((((..((..((.(((.(((.&)))))))).))..))))))).	3273	3294	0.974359	-24.7	1	2.12696e-08	0.515	0.320212	-0.185099	-12.1766	17	21	8	3UTR		0	0
hsa-miR-1291	NM_000214	JAG1	..(((((((((((((((((((((.&)))))).))))..)).))...))))))).	5713	5742	0.974359	-24.7	1	0.00107512	0.471	1.45507	2.02513	-4.957	21	29	7	3UTR		0	0
hsa-miR-1291	NM_001079684	KIAA1191	.(((((((((((((.(........&.).))))).)))))))).	2313	2360	0.974359	-23.8	1	2.1436e-05	0.5	4.64357	4.37998	-4.52877	14	18	8	3UTR		0	0
hsa-miR-1291	NM_001098503	PTPRJ	.((((((((((((((((((.....&.))))))))).......))).)))))).	2214	2263	0.974359	-23.1	1	0.0213292	0.485	-0.148649	0.0614191	-3.79332	18	28	9	3UTR		0	0
hsa-miR-1291	NM_001134709	DEK	.((((((((((..(((..((((..&))))..)))..)))))))))).	2302	2324	0.974359	-21.3	1	0.000225092	0.632	3.19384	2.9282	-8.42926	17	22	10	3UTR		0	0
hsa-miR-1291	NM_001142499	FLYWCH2	((((((((...((((.((.((...&.)).)).)))))))))))).	744	778	0.974359	-21.9	1	6.45152e-06	0.5	-0.434684	-0.359772	-9.29429	16	20	12	3UTR		0	0
hsa-miR-1291	NM_014654	SDC3	.((((((((...((((((.((...&)).))))))...)))))))).	3437	3458	0.974359	-26.5	1	0.00646504	0.529	0.534807	0.388493	-11.2074	16	21	8	3UTR		0	1
hsa-miR-1291	NM_003101	SOAT1	((((((((....((..(((((...&)))))..)).)))))))).	3832	3851	0.974359	-25.6	1	0.000182146	0.515	0.345205	-0.0799763	-13.3765	15	19	8	3UTR		0	0
hsa-miR-1291	NM_003144	SSR1	(((((((((..(...((((((...&))))))..)..))))))))).	3276	3297	0.974359	-27.1	1	4.14232e-05	0.529	0.383356	-0.287629	-10.8863	16	21	9	3UTR		0	0
hsa-miR-1291	NM_014388	UTP25	.(((((.((((((((.((((((((&.)))))..))).))))))))..))))).	6591	6633	0.974359	-33.2	1	0.00153283	0.382	0.00225365	0.177647	-5.57006	21	28	8	3UTR		0	0
hsa-miR-1291	NM_001099455	CPPED1	.((((..((.(.(((((((((...&.))))))))).)..))..)))).	4582	4618	0.978022	-24.6	1	0.00255025	0.412	-0.767908	-0.289218	-11.8273	16	23	9	3UTR		0	0
hsa-miR-1291	NM_001252624	SLC8A1	..(((((..(((.(..((((((((&))))))))..).)))...))))).	12901	12925	0.980769	-26.9	1	0.000121719	0.515	0.306661	0.214703	-10.5847	17	24	8	3UTR		0	0
hsa-miR-1291	NM_001300756	SLC9B2	.(((((((.(((((...((((...&.))))....)))))))))))).	4723	4787	0.980769	-25.9	1	2.69744e-06	0.441	4.35282	4.35994	-5.81821	16	22	12	3UTR		0	0
hsa-miR-1291	NM_033204	ZNF101	.(((......((((((((.(((((&))))).))))))))......))).	4604	4628	0.980769	-19.7	1	0.00405733	0.698	0.504401	0.420253	-15.9695	16	24	8	3UTR		0	0
hsa-miR-1291	NM_198336	INSIG1	.((((((((((((((((((((.((&.))))))))))))).)))...........................)))))).	1924	1997	0.980769	-22.8	1	0.0030965	0.603	0.879558	1.0492	-3.79332	22	52	13	3UTR		0	0
hsa-miR-1291	XM_011519337	MPP7	.((((.(..(((.((((((((((.&)))))))))))))..).)))).	2324	2346	0.980769	-28.9	1	8.23374e-05	0.471	0	0	-10.3534	18	22	13	3UTR		0	0
hsa-miR-1291	XM_011523831	KCNJ12	.(((((((...(((((((.((((.&)))).).))))))))))))).	3158	3179	0.980769	-28.9	1	0.000129852	0.353	0	0	-8.917	18	21	13	3UTR		0	1
hsa-miR-1291	XM_011544512	NRG1	.((((..((.(((((((((((...&.)))))))))))..))..)))).	9148	9194	0.980769	-28.8	1	0.0168113	0.426	0	0	-8.48048	17	23	11	3UTR		0	0
hsa-miR-1291	XM_017003888	UNC80	.((((((((((..(((.((.((((&)))).)).))))))))))))).	12726	12748	0.980769	-28	1	0.00176287	0.485	0	0	-8.42926	19	22	13	3UTR		0	0
hsa-miR-1291	XM_017005116	PLCD4	...(((((.((((((.((((((..&.)))))))))))).))))).	2691	2733	0.980769	-26.8	1	0.00140068	0.471	0	0	-7.80398	17	20	12	3UTR		0	0
hsa-miR-1291	XM_024453020	HECW2	.(((((((((((.((((...((((&.)))).)))))))..)))))))).	8966	9006	0.980769	-27.1	1	0.00083648	0.588	0	0	-5.08246	19	24	8	3UTR		0	0
hsa-miR-1291	NM_015375	DSTYK	.(((((((...(((..((((((((&))))))))..)))..))))))).	5016	5039	0.980769	-25.6	1	0.000279044	0.588	0.831283	1.65823	-9.88549	18	23	8	3UTR		0	0
hsa-miR-1291	NM_018715	RCC2	....(((((((((((((((((((.&.))).))))))))).)).))))).	3840	3880	0.980769	-28.1	1	4.88728e-05	0.5	0	0	-9.54656	19	24	9	3UTR		0	0
hsa-miR-1291	NM_020453	ATP10D	(((((((((((((((.((((((..&)))))))))))))..............................)))).)))).	5665	5718	0.980769	-25.3	1	0.00122837	0.676	0.236452	0.399574	-4.17062	21	53	13	3UTR		0	1
hsa-miR-1291	NM_022764	MTHFSD	((((..((((.((((.((((((((&))))))))..))))..)))).....)))).	2876	2906	0.980769	-23.7	1	0.00428273	0.559	4.07469	2.93031	-13.0154	20	30	8	3UTR		0	0
hsa-miR-1291	NM_024907	FBXO17	(((((((.(((((((..(((((((&))))))))))))))..)).))))).	1449	1474	0.980769	-29.9	1	0.000237647	0.471	1.28655	0.776009	-6.48426	21	25	14	3UTR		0	0
hsa-miR-1291	NM_005288	GPR12	(((((((..((.(((((((((...&.))))))))).)).))))))).	3124	3160	0.980769	-28	1	0.00203465	0.603	0	0	-10.6544	18	22	9	3UTR		0	0
hsa-miR-1291	NM_013231	FLRT2	((((((((.(((((((.(((.((.&)))))...))))))))))))))).	6610	6634	0.980769	-27.2	1	0.0270707	0.588	-0.429955	0.482989	-4.99396	20	24	15	3UTR		0	0
hsa-miR-1291	NM_013956	NRG1	.((((..((.(((((((((((...&.)))))))))))..))..)))).	9264	9310	0.980769	-28.8	1	0.0168113	0.426	-0.0261167	0.0499305	-8.48048	17	23	11	3UTR		0	0
hsa-miR-1291	NM_013957	NRG1	.((((..((.(((((((((((...&.)))))))))))..))..)))).	9240	9286	0.980769	-28.8	1	0.0168113	0.426	-0.0261167	0.0499305	-8.48048	17	23	11	3UTR		0	0
hsa-miR-1291	NM_013960	NRG1	.((((..((.(((((((((((...&.)))))))))))..))..)))).	9391	9437	0.980769	-28.8	1	0.0168113	0.426	-0.0261167	0.0499305	-8.48048	17	23	11	3UTR		0	0
hsa-miR-1291	NM_013964	NRG1	.((((..((.(((((((((((...&.)))))))))))..))..)))).	9249	9295	0.980769	-28.8	1	0.0168113	0.426	-0.0261167	0.0499305	-8.48048	17	23	11	3UTR		0	0
hsa-miR-1291	NM_001346144	FLRT2	((((((((.(((((((.(((.((.&)))))...))))))))))))))).	6632	6656	0.980769	-27.2	1	0.0270707	0.588	-0.429955	0.482989	-4.99396	20	24	15	3UTR		0	0
hsa-miR-1291	NM_001353004	TPRA1	.((((((((.((((((((.(((((&)))))..)))................))))))))))))).	3384	3424	0.980769	-26.7	1	0.000432918	0.471	0.451285	0.718273	-5.03583	21	40	13	3UTR		0	1
hsa-miR-1291	NM_001363522	GRM3	.((((((((((((.(..((((...&))))..).)))))..))))))).	2913	2936	0.980769	-22.2	1	1.01393e-05	0.603	1.73077	1.37601	-4.88321	17	23	7	3UTR		0	0
hsa-miR-1291	NM_001011718	XKR7	(((((((..(((....((((((((&))))))))......................)))..))))))).	3607	3650	0.980769	-27.8	1	9.05165e-05	0.397	0.300266	0.307869	-10.4221	18	43	8	3UTR		0	1
hsa-miR-1291	NM_001025580	AMMECR1	...((((..((((((.((((((((&)))))))).))))))..)))).	2840	2862	0.980769	-26.4	1	0.000276901	0.603	0.55749	0.562012	-10.1176	18	22	8	3UTR		0	0
hsa-miR-1291	NM_001039614	INSYN1	.((((((((((....(((..((((&))))..)))...)))))))))).	6952	6975	0.980769	-28.1	1	3.67468e-05	0.309	-0.0163961	-0.244473	-10.0215	17	23	10	3UTR		0	0
hsa-miR-1291	NM_001043352	TPM3	(((.((((.((((.((..((((((&)))))))).)))))))).))).	1212	1234	0.980769	-22.9	1	4.65612e-06	0.5	0.945162	1.14547	-8.88283	19	22	8	3UTR		0	0
hsa-miR-1291	NM_001043353	TPM3	(((.((((.((((.((..((((((&)))))))).)))))))).))).	1212	1234	0.980769	-22.9	1	4.65612e-06	0.5	0.945162	1.14547	-8.88283	19	22	8	3UTR		0	0
hsa-miR-1291	NM_001104595	FAM118A	((((((.(((((.((((((((((.&))))).)))))))))).).))))).	3250	3275	0.980769	-28.7	1	1.26393e-05	0.559	0	0	-6.77039	21	25	10	3UTR		0	0
hsa-miR-1291	NM_001112800	SLC8A1	..(((((..(((.(..((((((((&))))))))..).)))...))))).	12910	12934	0.980769	-26.9	1	0.000121719	0.515	0.140972	0.14677	-10.5847	17	24	8	3UTR		0	0
hsa-miR-1291	NM_001112802	SLC8A1	..(((((..(((.(..((((((((&))))))))..).)))...))))).	12904	12928	0.980769	-26.9	1	0.000121719	0.515	0.372937	0.155055	-10.5847	17	24	8	3UTR		0	0
hsa-miR-1291	NM_001159377	MTHFSD	((((..((((.((((.((((((((&))))))))..))))..)))).....)))).	2879	2909	0.980769	-23.7	1	0.00428273	0.559	4.51821	3.04777	-13.0154	20	30	8	3UTR		0	0
hsa-miR-1291	NM_001159378	MTHFSD	((((..((((.((((.((((((((&))))))))..))))..)))).....)))).	2879	2909	0.980769	-23.7	1	0.00428273	0.559	4.51821	2.94344	-13.0154	20	30	8	3UTR		0	0
hsa-miR-1291	NM_001159996	NRG1	.((((..((.(((((((((((...&.)))))))))))..))..)))).	8681	8727	0.980769	-28.8	1	0.0168113	0.426	0	0	-8.48048	17	23	11	3UTR		0	0
hsa-miR-1291	NM_001160004	NRG1	.((((..((.(((((((((((...&.)))))))))))..))..)))).	9382	9428	0.980769	-28.8	1	0.0168113	0.426	-0.0261167	0.0499305	-8.48048	17	23	11	3UTR		0	0
hsa-miR-1291	NM_001171689	AMMECR1	...((((..((((((.((((((((&)))))))).))))))..)))).	3205	3227	0.980769	-26.4	1	0.000276901	0.603	1.15661	1.38608	-10.1176	18	22	8	3UTR		0	0
hsa-miR-1291	NM_001243536	ANKRD65	(((((((..(((..(((((((((.&.)))))))))...)))))))))).	415	465	0.980769	-29.6	1	7.81084e-05	0.294	0	0	-9.45357	19	24	10	3UTR		0	0
hsa-miR-1291	NM_002387	MCC	.((((((.(((((((((.......&.))))))))).)))))).	6831	6857	0.984615	-23.7	1	0.00198821	0.544	3.94712	3.76117	-6.10696	15	18	9	3UTR		0	0
hsa-miR-1291	NM_183004	EIF5	((((((.(((((((.((.......&)).))))))).)).)))).	3756	3775	0.987179	-23.2	1	0.00254132	0.662	0.401313	0.437341	-6.21671	15	19	7	3UTR		0	0
hsa-miR-1291	NM_001969	EIF5	((((((.(((((((.((.......&)).))))))).)).)))).	3691	3710	0.987179	-23.2	1	0.00254132	0.662	0.401313	0.437341	-6.21671	15	19	7	3UTR		0	0
hsa-miR-1291	XM_011513805	PACRGL	(.(((..(((((.((((((((...&)))))))))))...)).))).).	1493	1516	0.991453	-22	1	0.000711871	0.485	0	0	-9.83503	17	23	11	3UTR		0	0
hsa-miR-1291	XM_017007747	PACRGL	(.(((..(((((.((((((((...&)))))))))))...)).))).).	1715	1738	0.991453	-22	1	0.000711871	0.485	0	0	-9.83503	17	23	11	3UTR		0	0
hsa-miR-1291	XM_017007749	PACRGL	(.(((..(((((.((((((((...&)))))))))))...)).))).).	1581	1604	0.991453	-22	1	0.000711871	0.485	0	0	-9.83503	17	23	11	3UTR		0	0
hsa-miR-1291	XM_017007751	PACRGL	(.(((..(((((.((((((((...&)))))))))))...)).))).).	1783	1806	0.991453	-22	1	0.000711871	0.485	0	0	-9.83503	17	23	11	3UTR		0	0
hsa-miR-1291	XM_017007752	PACRGL	(.(((..(((((.((((((((...&)))))))))))...)).))).).	1630	1653	0.991453	-22	1	0.000711871	0.485	0	0	-9.83503	17	23	11	3UTR		0	0
hsa-miR-1291	XM_017007753	PACRGL	(.(((..(((((.((((((((...&)))))))))))...)).))).).	1500	1523	0.991453	-22	1	0.000711871	0.485	0	0	-9.83503	17	23	11	3UTR		0	0
hsa-miR-1291	XM_017007758	PACRGL	(.(((..(((((.((((((((...&)))))))))))...)).))).).	1252	1275	0.991453	-22	1	0.000711871	0.485	0	0	-9.83503	17	23	11	3UTR		0	0
hsa-miR-1291	NM_001252511	SOAT1	((((((((....((..(((((...&)))))..)).)))))))).	3773	3792	1	-25.6	1	0.000182146	0.515	-0.395583	-0.334622	-13.3765	15	19	8	3UTR		0	0
hsa-miR-1291	NM_001252512	SOAT1	((((((((....((..(((((...&)))))..)).)))))))).	3706	3725	1	-25.6	1	0.000182146	0.515	-0.395583	-0.334622	-13.3765	15	19	8	3UTR		0	0
hsa-miR-1291	NM_001252652	SLC1A2	.((((((((....(((((.((((.&))))..))))).....)))))))).	5071	5096	1	-25.5	1	0.000132325	0.574	0.495534	-0.118851	-12.4965	17	25	8	3UTR		0	0
hsa-miR-1291	NM_001253379	RPL15	.((((((((....((((((((((.&))))))))))....))).).)))).	1630	1655	1	-23.4	1	0.00606958	0.574	0.640356	0.23531	-12.4965	18	25	10	3UTR		0	0
hsa-miR-1291	NM_001253380	RPL15	.((((((((....((((((((((.&))))))))))....))).).)))).	1740	1765	1	-23.4	1	0.00606958	0.574	0.640356	0.23531	-12.4965	18	25	10	3UTR		0	0
hsa-miR-1291	NM_001253382	RPL15	.((((((((....((((((((((.&))))))))))....))).).)))).	1186	1211	1	-23.4	1	0.00606958	0.574	0.640356	0.23531	-12.4965	18	25	10	3UTR		0	0
hsa-miR-1291	NM_001253383	RPL15	.((((((((....((((((((((.&))))))))))....))).).)))).	1096	1121	1	-23.4	1	0.00606958	0.574	0.640356	0.23531	-12.4965	18	25	10	3UTR		0	0
hsa-miR-1291	NM_001253384	RPL15	.(((((.((((..((((((((...&.))))))))...))))..))))).	2402	2439	1	-29.3	1	0.000329444	0.5	-0.100564	0.0165554	-9.97295	17	24	8	3UTR		0	0
hsa-miR-1291	NM_001253676	TBPL1	.(((((((..((.((.((((.((.&))))))))))..)))).))).	2393	2414	1	-20	1	3.62385e-06	0.515	0	0	-7.6144	17	21	10	3UTR		0	0
hsa-miR-1291	NM_001253693	MCOLN3	..((((((......(((((((((.&))))))))).)))))).	2289	2306	1	-19.5	1	3.64853e-05	0.574	1.70244	2.82442	-15.5734	15	17	9	3UTR		0	0
hsa-miR-1291	NM_001253849	VTCN1	.((((((.(((.((((((((....&.)))))))).))).....)))))).	2090	2136	1	-24.9	1	0.0355381	0.5	2.19549	1.80937	-9.45376	17	25	8	3UTR		0	0
hsa-miR-1291	NM_001253850	VTCN1	.((((((.(((.((((((((....&.)))))))).))).....)))))).	1627	1673	1	-24.9	1	0.0355381	0.5	0.926083	0.600377	-9.45376	17	25	8	3UTR		0	0
hsa-miR-1291	NM_001253852	AP4B1	(((((((.(((((.((((..((((&.)))).....)))).)))...)).))))))).	2604	2649	1	-25.1	1	0.00255607	0.603	3.20629	3.87601	-7.10805	20	32	7	3UTR		0	0
hsa-miR-1291	NM_001253875	UXS1	((.(((((.((..(((...(((((&)))))...)))..))))))).)).	1950	1974	1	-23.1	1	0.000393547	0.485	2.74611	2.11858	-11.1874	17	24	7	3UTR		0	0
hsa-miR-1291	NM_001253891	DGAT2	.((((((..(((((((........&)))))))..)))))).	2065	2081	1	-23.7	1	8.43062e-06	0.485	-0.20614	0.036799	-7.16335	13	16	7	3UTR		0	0
hsa-miR-1291	NM_001254749	RGS5	(((((.(((((((((.((((.(((&.))).)))))))).....................)))))..))))).	4928	4985	1	-21.5	1	0.00540929	0.559	0.471642	0.0898391	-6.07158	21	47	8	3UTR		0	0
hsa-miR-1291	NM_001254757	ST3GAL4	(((((((..(((..(((((((...&.))))))).........)))...)).))))).	1532	1570	1	-24.4	1	0.00146327	0.529	1.79957	0.927868	-9.45357	17	32	7	3UTR		0	0
hsa-miR-1291	NM_001254758	ST3GAL4	(((((((..(((..(((((((...&.))))))).........)))...)).))))).	1446	1484	1	-24.4	1	0.00146327	0.529	1.79957	0.927868	-9.45357	17	32	7	3UTR		0	0
hsa-miR-1291	NM_001254759	ST3GAL4	(((((((..(((..(((((((...&))))))).........)))...)).))))).	1692	1723	1	-24.7	1	0.00146327	0.529	2.82486	1.01616	-9.45357	17	31	7	3UTR		0	0
hsa-miR-1291	NM_001256139	CAPG	.((((((..(((..((((((((((&))))).)))))....)))))).))).	1155	1181	1	-24.7	1	6.3682e-06	0.456	1.87945	2.15068	-9.30932	19	26	6	3UTR		0	0
hsa-miR-1291	NM_001256140	CAPG	.((((((..(((..((((((((((&))))).)))))....)))))).))).	1127	1153	1	-24.7	1	6.3682e-06	0.456	1.31618	1.10006	-9.30932	19	26	6	3UTR		0	0
hsa-miR-1291	NM_001256160	ATF7IP2	((((..((((((.((.(((((...&)))))..)).))))))...)))).	2844	2868	1	-22.9	1	0.152675	0.529	-0.243385	-0.132184	-11.4798	17	24	6	3UTR		0	0
hsa-miR-1291	NM_001256160	ATF7IP2	((((.((((..((((..(((((((&)))))))))))..))))...................)))).	2518	2559	1	-20.2	1	1.20895e-05	0.559	-0.0297704	-0.188967	-12.3569	19	41	11	3UTR		0	0
hsa-miR-1291	NM_001256420	MAPRE2	.((((((((...((..(.(((...&))).)..)))))))))).	1585	1603	1	-20.4	1	0.00319783	0.544	0.916016	0.916016	-12.1759	14	18	10	3UTR		0	0
hsa-miR-1291	NM_001256424	GUCY1A2	.((((((..(((.(((((.((...&.)).))))))))..)))))).	7814	7865	1	-27	1	7.38462e-06	0.588	0.258117	1.4957	-8.45248	16	21	8	3UTR		0	0
hsa-miR-1291	NM_001256425	PDLIM5	..(((((.((((....(((((...&)))))...))))))))).	2736	2754	1	-21	1	0.000113885	0.5	0.0693632	0.0701826	-10.3851	14	18	9	3UTR		0	0
hsa-miR-1291	NM_001256426	PDLIM5	..(((((.((((....(((((...&)))))...))))))))).	3242	3260	1	-21	1	0.000113885	0.5	0.0693632	0.0701826	-10.3851	14	18	9	3UTR		0	0
hsa-miR-1291	NM_001256438	CABLES1	..((((((((((.((.((.(((((&))))).))))))).))))))).	4112	4134	1	-25.5	1	1.1634e-07	0.397	-0.224886	-0.340889	-6.47918	19	22	7	3UTR		0	1
hsa-miR-1291	NM_001256530	TSPO	.(((((((((...((((.(((((.&))))).))))))))))))).	914	934	1	-31.3	1	0.00122452	0.382	0	0	-11.254	18	20	13	3UTR		0	1
hsa-miR-1291	NM_001256531	TSPO	.(((((((((...((((.(((((.&))))).))))))))))))).	823	843	1	-31.3	1	0.00122452	0.382	0	0	-11.254	18	20	13	3UTR		0	1
hsa-miR-1291	NM_001256570	RXRG	.(((((((.....(((.((((((.&))))))))).))))))).	1879	1897	1	-20.7	1	0.00012089	0.559	1.27471	0.786216	-13.5529	16	18	9	3UTR		0	0
hsa-miR-1291	NM_001256585	MGLL	((((((((((......(((((((.&.))))))))))))).)))).	3378	3424	1	-28.3	1	6.32106e-06	0.338	2.19974	2.96779	-13.2236	17	20	13	3UTR		0	0
hsa-miR-1291	NM_001256620	R3HCC1L	(((((((.((((...((((.((((&)))))))).....)))).))).)))).	2803	2830	1	-21.9	1	0.000579073	0.471	0.657586	0.430636	-9.13263	19	27	8	3UTR		0	0
hsa-miR-1291	NM_001256627	BRSK2	((((((((...((((.(((.(((.&))).))).)))))))))))).	3069	3090	1	-26.2	1	3.85624e-08	0.353	0.0542666	-0.108006	-9.29429	18	21	12	3UTR		0	0
hsa-miR-1291	NM_001256627	BRSK2	((((((((.((.....(((((.((&.)).))))))))))))))).	3589	3644	1	-25.7	1	4.59149e-06	0.353	1.13349	1.14444	-11.4552	17	20	15	3UTR		0	0
hsa-miR-1291	NM_001256629	BRSK2	((((((((...((((.(((.(((.&))).))).)))))))))))).	2646	2667	1	-26.2	1	3.85624e-08	0.353	0.0542666	-0.108006	-9.29429	18	21	12	3UTR		0	0
hsa-miR-1291	NM_001256629	BRSK2	((((((((.((.....(((((.((&.)).))))))))))))))).	3166	3221	1	-25.7	1	4.59149e-06	0.353	1.13349	1.14444	-11.4552	17	20	15	3UTR		0	0
hsa-miR-1291	NM_001256630	BRSK2	((((((((...((((.(((.(((.&))).))).)))))))))))).	3061	3082	1	-26.2	1	3.85624e-08	0.353	0.0542666	-0.108006	-9.29429	18	21	12	3UTR		0	0
hsa-miR-1291	NM_001256630	BRSK2	((((((((.((.....(((((.((&.)).))))))))))))))).	3581	3636	1	-25.7	1	4.59149e-06	0.353	1.13349	1.14444	-11.4552	17	20	15	3UTR		0	0
hsa-miR-1291	NM_001256657	CHRND	((((((...(((.((.(((((...&)))))))))))))))).	1811	1828	1	-25.5	1	2.7981e-07	0.279	0.908778	-0.569978	-10.3735	16	17	16	3UTR		0	0
hsa-miR-1291	NM_001256678	PRORP	.((((((((..((((((((((...&)))).)))..)))..)))))))).	5398	5422	1	-25.4	1	0.00859452	0.515	0.360956	0.314084	-7.86061	18	24	8	3UTR		0	0
hsa-miR-1291	NM_001256679	PRORP	.((((((((..((((((((((...&)))).)))..)))..)))))))).	4893	4917	1	-25.4	1	0.00859452	0.515	0.360956	0.314084	-7.86061	18	24	8	3UTR		0	0
hsa-miR-1291	NM_001256695	PRDM11	..(((((((((.(((((((.(...&).))))))).)......)))))))).	6664	6690	1	-25.8	1	4.80317e-05	0.5	-0.333753	-0.135271	-8.3038	17	26	8	3UTR		0	0
hsa-miR-1291	NM_001256702	USP3	.(((((.((.(((((((((((...&))))))))).)).))..))))).	3398	3421	1	-27.9	1	0.00523126	0.397	-0.612146	-0.247597	-6.57952	18	23	9	3UTR		0	0
hsa-miR-1291	NM_001256726	USP39	..((((((.((((((.(.((....&)).))))))))))))).	1816	1833	1	-21.6	1	3.81602e-05	0.5	0.103877	0.0422871	-6.24644	15	17	13	3UTR		0	0
hsa-miR-1291	NM_001256732	SSBP2	(((((.((.(((((..((((((.(&).))))))..)).))).)).).)))).	5846	5873	1	-22.6	1	5.17425e-06	0.544	-0.0294515	-0.0105994	-7.86342	19	27	6	3UTR		0	0
hsa-miR-1291	NM_001256733	SSBP2	(((((.((.(((((..((((((.(&).))))))..)).))).)).).)))).	5762	5789	1	-22.6	1	5.17425e-06	0.544	0.062261	0.000100385	-7.86342	19	27	6	3UTR		0	0
hsa-miR-1291	NM_001256734	SSBP2	(((((.((.(((((..((((((.(&).))))))..)).))).)).).)))).	5756	5783	1	-22.6	1	5.17425e-06	0.544	0.225306	0.00545026	-7.86342	19	27	6	3UTR		0	0
hsa-miR-1291	NM_001256735	SSBP2	(((((.((.(((((..((((((.(&).))))))..)).))).)).).)))).	5732	5759	1	-22.6	1	5.17425e-06	0.544	0.123402	0.116405	-7.86342	19	27	6	3UTR		0	0
hsa-miR-1291	NM_001256736	SSBP2	(((((.((.(((((..((((((.(&).))))))..)).))).)).).)))).	5633	5660	1	-22.6	1	5.17425e-06	0.544	0	0	-7.86342	19	27	6	3UTR		0	0
hsa-miR-1291	NM_001256737	GDAP1L1	.((((((..((((...((((((.(&).))))))....)))))))))).	1553	1576	1	-26.6	1	8.0336e-08	0.324	1.32746	0.999431	-8.98869	17	23	10	3UTR		0	0
hsa-miR-1291	NM_001256740	GDAP1L1	.((((((..((((...((((((.(&).))))))....)))))))))).	1283	1306	1	-26.6	1	8.0336e-08	0.324	1.32746	0.999431	-8.98869	17	23	10	3UTR		0	0
hsa-miR-1291	NM_001256798	NOL4L	...(((((((((.((.(((((...&)))))))))))))))).	5100	5117	1	-29.7	1	0.000104075	0.603	5.10827	5.80136	-8.03672	16	17	16	3UTR		0	1
hsa-miR-1291	NM_001256823	ZNF195	.(((((((.((..((((.(((((.&)))))...))))...))))))))).	3028	3053	1	-26.4	1	3.3213e-07	0.471	-0.0416201	-0.0115709	-9.48565	18	25	9	3UTR		0	0
hsa-miR-1291	NM_001256823	ZNF195	((((((((((.(((((........&))))).)))))))))).	2709	2726	1	-22.6	1	0.000791721	0.529	-0.27112	0.121627	-6.76235	15	17	10	3UTR		0	0
hsa-miR-1291	NM_001256825	ZNF195	.(((((((.((..((((.(((((.&)))))...))))...))))))))).	2990	3015	1	-26.4	1	3.3213e-07	0.471	-0.0416201	-0.0215329	-9.48565	18	25	9	3UTR		0	0
hsa-miR-1291	NM_001256825	ZNF195	((((((((((.(((((........&))))).)))))))))).	2671	2688	1	-22.6	1	0.000791721	0.529	-0.261783	-0.00789761	-6.76235	15	17	10	3UTR		0	0
hsa-miR-1291	NM_001256847	ABR	((((((.(.(((.((.((.(((((&)))))))))..))).)..)))))).	2505	2530	1	-24.9	1	6.54022e-05	0.338	1.70544	1.84457	-8.05983	19	25	9	3UTR		0	0
hsa-miR-1291	NM_001256856	BTRC	.((((((((.(((((((((((((.&))))....))))))...............))))))))))).	2920	2961	1	-26	1	0.00149725	0.485	2.29217	1.92342	-5.03583	21	41	11	3UTR		0	1
hsa-miR-1291	NM_001256877	KANK1	((((((((((.((((((...(((.&.)))...)))))).)).)))))).)).	4975	5031	1	-23.8	1	0.00111257	0.485	3.03151	2.27951	-6.76235	19	27	6	3UTR		0	0
hsa-miR-1291	NM_001257118	CASP1	...(((((((((((((((......&))))))))).)))))).	1474	1491	1	-19.7	1	0.0287595	0.706	0.716791	1.18489	-6.51454	15	17	9	3UTR		0	0
hsa-miR-1291	NM_001257119	CASP1	...(((((((((((((((......&))))))))).)))))).	1411	1428	1	-19.7	1	0.0287595	0.706	1.57914	1.87705	-6.51454	15	17	9	3UTR		0	0
hsa-miR-1291	NM_001257139	CLCNKA	.(((((.((((..(((((((((((&))))..))))).))..))))))))).	2002	2028	1	-24.9	1	3.65606e-07	0.382	-1.08238	0.00738585	-9.97295	20	26	9	3UTR		0	0
hsa-miR-1291	NM_001257160	CEP41	(((((((((((((((((((((...&))))))...........................)))))))))))............)))).	2431	2492	1	-22.8	1	0.00178365	0.647	1.04031	1.02348	-3.93757	21	61	11	3UTR		0	0
hsa-miR-1291	NM_001257195	KLHL3	.((((((..(((.((((((((((.&))))......)))))))))..)))))).	2875	2903	1	-27	1	5.79029e-05	0.515	-0.0398756	-0.0236741	-8.45248	19	28	9	3UTR		0	0
hsa-miR-1291	NM_001257208	FGF1	.(((((.(((((..(.((((((((&)))).)))))))))).))))).	888	910	1	-25.9	1	8.30312e-06	0.471	0.072449	0.172024	-7.71603	19	22	10	3UTR		0	0
hsa-miR-1291	NM_001257291	SLC9A7	.(((((.(((((((((((((((((&))))))..)))))))))))))))).	5211	5236	1	-31.2	1	0.00322693	0.603	-0.134424	0.0765819	-5.33701	22	25	16	3UTR		0	0
hsa-miR-1291	NM_001257359	SAMD14	.((((((((..(.(((((......&)))))..)..)))))))).	2621	2640	1	-25.4	1	8.37609e-05	0.426	0.760393	0.501889	-9.14974	14	19	8	3UTR		0	1
hsa-miR-1291	NM_001257394	UBE2V1	.((((((((((((((.((((....&)))).))))))........)))))))).	1377	1405	1	-23.8	1	1.34915e-05	0.471	3.5699	3.11895	-4.02637	18	28	8	3UTR		0	0
hsa-miR-1291	NM_001257398	UBE2V1	.((((((((((((((.((((....&)))).))))))........)))))))).	1236	1264	1	-23.8	1	1.34915e-05	0.471	0.0119946	2.04903	-4.02637	18	28	8	3UTR		0	0
hsa-miR-1291	NM_001257409	IKZF3	(.(((((.(((.....(((((...&)))))...))).))))).).	5036	5056	1	-23.5	1	0.00178254	0.441	0.10971	-0.0971204	-13.8762	14	20	5	3UTR		0	0
hsa-miR-1291	NM_001257411	IKZF3	(.(((((.(((.....(((((...&)))))...))).))))).).	4826	4846	1	-23.5	1	0.00178254	0.441	-0.0614598	0.0895027	-13.8762	14	20	5	3UTR		0	0
hsa-miR-1291	NM_001257412	IKZF3	(.(((((.(((.....(((((...&)))))...))).))))).).	4709	4729	1	-23.5	1	0.00178254	0.441	-0.06146	-0.221932	-13.8762	14	20	5	3UTR		0	0
hsa-miR-1291	NM_001258038	SPRY1	((((((((((((.(((.(((....&)))))).)))))))))))).	1831	1851	1	-26.2	1	0.00167873	0.603	0	0	-5.22671	18	20	12	3UTR		0	0
hsa-miR-1291	NM_001258040	HARS1	.(((((((.(.((.(((((.....&)))))...)).)))))))).	1738	1758	1	-23.1	1	2.26462e-05	0.353	0.576228	0.405245	-8.53133	15	20	8	3UTR		0	0
hsa-miR-1291	NM_001258041	HARS1	.(((((((.(.((.(((((.....&)))))...)).)))))))).	1798	1818	1	-23.1	1	2.26462e-05	0.353	0.576228	0.405245	-8.53133	15	20	8	3UTR		0	0
hsa-miR-1291	NM_001258042	HARS1	.(((((((.(.((.(((((.....&)))))...)).)))))))).	1678	1698	1	-23.1	1	2.26462e-05	0.353	0.576228	0.405245	-8.53133	15	20	8	3UTR		0	0
hsa-miR-1291	NM_001258329	EPB41L1	.(((((((((((...(((((....&))))).....))))))))))).	4148	4170	1	-30.1	1	5.81946e-06	0.382	0.664122	0.316498	-6.67474	16	22	11	3UTR		0	1
hsa-miR-1291	NM_001258330	EPB41L1	.(((((((((((...(((((....&))))).....))))))))))).	3566	3588	1	-30.1	1	5.81946e-06	0.382	0.664122	0.316498	-6.67474	16	22	11	3UTR		0	1
hsa-miR-1291	NM_001258331	EPB41L1	.(((((((((((...(((((....&))))).....))))))))))).	3883	3905	1	-30.1	1	5.81946e-06	0.382	0.664122	0.316498	-6.67474	16	22	11	3UTR		0	1
hsa-miR-1291	NM_001258395	CCDC103	.(((((((((((((((((((((((&))).))))))))))))...))))............)))).	2176	2216	1	-27.4	1	5.09784e-05	0.412	3.17609	3.29445	-3.79332	23	40	12	3UTR		0	0
hsa-miR-1291	NM_001258396	CCDC103	.(((((((((((((((((((((((&))).))))))))))))...))))............)))).	2190	2230	1	-27.4	1	5.09784e-05	0.412	3.17609	3.29445	-3.79332	23	40	12	3UTR		0	0
hsa-miR-1291	NM_001259	CDK6	..(((..((((((((((.(((((.&)))))..))))))))))))).	8143	8164	1	-25.7	1	0.00542482	0.662	0.131461	0.0642439	-8.40165	18	21	13	3UTR		0	0
hsa-miR-1291	NM_001260491	SLC9A8	.(((((..((((...(((((((.(&).)))))))...))))))))).	5611	5633	1	-28	1	0.000298031	0.412	-0.445917	-0.717051	-10.5321	17	22	9	3UTR		0	0
hsa-miR-1291	NM_001260508	KCNJ3	(((((((((((..((.(((.....&))))).))))))....))))).	3530	3552	1	-20.2	1	0.00952041	0.515	0.233309	1.00784	-8.80656	16	22	6	3UTR		0	0
hsa-miR-1291	NM_001261390	CALCOCO2	.(((((((((((.(((((..(((.&.)))..))))))))).)).))))).	1688	1741	1	-29.6	1	0.00012	0.471	0.197451	-0.0523816	-5.08246	19	25	9	3UTR		0	0
hsa-miR-1291	NM_001261391	CALCOCO2	.(((((((((((.(((((..(((.&.)))..))))))))).)).))))).	1679	1732	1	-29.6	1	0.00012	0.471	0.197451	-0.0523816	-5.08246	19	25	9	3UTR		0	0
hsa-miR-1291	NM_001261393	CALCOCO2	.(((((((((((.(((((..(((.&.)))..))))))))).)).))))).	1490	1543	1	-29.6	1	0.00012	0.471	0.197451	-0.0523816	-5.08246	19	25	9	3UTR		0	0
hsa-miR-1291	NM_001261395	CALCOCO2	.(((((((((((.(((((..(((.&.)))..))))))))).)).))))).	1426	1479	1	-29.6	1	0.00012	0.471	0.197451	-0.0523816	-5.08246	19	25	9	3UTR		0	0
hsa-miR-1291	NM_001261400	PSMD9	((((((((((...((.(((((.((&.)).))))).)))))))))))).	905	969	1	-30.4	1	3.10711e-06	0.441	-0.0689202	-0.567965	-11.6313	19	23	12	3UTR		0	1
hsa-miR-1291	NM_001261445	TXNRD1	..((((((.(((((...((((...&))))...))))))))))).	2255	2274	1	-22.7	1	0.000450324	0.471	1.97663	1.92765	-6.98189	15	19	11	3UTR		0	0
hsa-miR-1291	NM_001261446	TXNRD1	..((((((.(((((...((((...&))))...))))))))))).	1810	1829	1	-22.7	1	0.000450324	0.471	1.97663	1.92765	-6.98189	15	19	11	3UTR		0	0
hsa-miR-1291	NM_001261839	TTPAL	(.((((((.(((.(((.((((...&)))))))))))))))).).	3725	3744	1	-24.8	1	5.71185e-05	0.397	-0.413684	-0.61495	-7.44677	17	19	16	3UTR		0	0
hsa-miR-1291	NM_001265578	FAM13A	(((((((((((((((((..(((((&)))).)..))))))))))....))))))).	3768	3798	1	-24.7	1	0.00177272	0.588	4.26138	4.76605	-3.93757	22	30	10	3UTR		0	0
hsa-miR-1291	NM_001265578	FAM13A	.((((((((((((.(((.(((((.&))))).)))..)))))))).)))).	4588	4613	1	-23.4	1	0.0160098	0.529	2.4871	1.82334	-4.65016	20	25	8	3UTR		0	0
hsa-miR-1291	NM_001265579	FAM13A	.((((((((((((.(((.(((((.&))))).)))..)))))))).)))).	4546	4571	1	-23.4	1	0.0160098	0.529	2.52307	1.47415	-4.65016	20	25	8	3UTR		0	0
hsa-miR-1291	NM_001265580	FAM13A	(((((((((((((((((..(((((&)))).)..))))))))))....))))))).	3726	3756	1	-24.7	1	0.00177272	0.588	5.33427	4.56401	-3.93757	22	30	10	3UTR		0	0
hsa-miR-1291	NM_001265580	FAM13A	.((((((((((((.(((.(((((.&))))).)))..)))))))).)))).	4546	4571	1	-23.4	1	0.0160098	0.529	2.85845	2.39777	-4.65016	20	25	8	3UTR		0	0
hsa-miR-1291	NM_001265594	PLEKHG5	(.(((((((((...(.(((((...&)))))..)...))))))))).).	4189	4212	1	-24.6	1	4.49406e-05	0.368	3.90315	2.50945	-10.8271	16	23	9	3UTR		0	0
hsa-miR-1291	NM_001265603	MORF4L1	((((...((((.((((.((((((.&.)))))))))).))))...)))).	1811	1845	1	-22.9	1	0.00161936	0.647	0	0	-14.8481	18	24	10	3UTR		0	0
hsa-miR-1291	NM_001265604	MORF4L1	((((...((((.((((.((((((.&)))))))))).))))...)))).	2098	2121	1	-22.9	1	0.00161936	0.647	0	0	-14.8481	18	23	10	3UTR		0	0
hsa-miR-1291	NM_001267035	PWWP2A	.((((.(((.....((((((((((&))))))))))))).)).)).	1628	1648	1	-22.2	1	7.52785e-06	0.515	1.078	1.47179	-15.2543	17	20	13	3UTR		0	0
hsa-miR-1291	NM_001267048	ELAPOR1	.((((.(((.((((((((((((((&)))))))).....))))))))).)))).	2939	2967	1	-26.4	1	0.0828775	0.603	1.48054	1.20875	-6.93679	21	28	9	3UTR		0	0
hsa-miR-1291	NM_001267052	UNC45B	((((((..((((.....(((((((&)))))))))))..)))))).	4359	4379	1	-24.2	1	2.73912e-05	0.515	0.045946	-0.117437	-10.9094	17	20	11	3UTR		0	1
hsa-miR-1291	NM_001267536	GOLGA6L4	((((((((.((..((((((((((.&)))))))))).)).))))..)))).	2174	2199	1	-23.8	1	3.76341e-05	0.559	0.941008	1.14804	-9.6299	20	25	10	3UTR		0	0
hsa-miR-1291	NM_001267594	SENP1	.(((((((((((((((..((((((&.)))))).......)))))))))..................)))))).	2263	2323	1	-24.1	1	0.000323972	0.529	2.1359	1.94825	-3.79332	21	48	9	3UTR		0	0
hsa-miR-1291	NM_001267605	ZNF248	(((((((..((..(((.(((((((&))))))))).)..))..))))))).	2972	2997	1	-28.6	1	0.000223908	0.515	0.493489	0.648029	-11.9435	19	25	9	3UTR		0	0
hsa-miR-1291	NM_001267607	ZNF248	(((((((....(.(((.((((((.&))))))))).)...))))))).	1908	1930	1	-24	1	0.00102621	0.529	-0.174958	0.107352	-12.664	17	22	9	3UTR		0	0
hsa-miR-1291	NM_001267607	ZNF248	..((((((((((.((((((((...&)).)))))).))).......)))..)))).	1230	1260	1	-21.9	1	0.0194123	0.471	-0.363247	0.127697	-6.24613	18	30	6	3UTR		0	0
hsa-miR-1291	NM_001267609	GPR161	.((((..(((((.(((((((((((&)))).....))))))).)))))...................)))).	3983	4029	1	-23.6	1	0.000310339	0.515	0.182412	-0.0352307	-8.5271	20	46	7	3UTR		0	0
hsa-miR-1291	NM_001267612	GPR161	.((((..(((((.(((((((((((&)))).....))))))).)))))...................)))).	3983	4029	1	-23.6	1	0.000310339	0.515	0.182412	-0.0352307	-8.5271	20	46	7	3UTR		0	0
hsa-miR-1291	NM_001267614	GPR161	.((((..(((((.(((((((((((&)))).....))))))).)))))...................)))).	3115	3161	1	-23.6	1	0.000310339	0.515	0.0561795	0.0553086	-8.5271	20	46	7	3UTR		0	0
hsa-miR-1291	NM_001267616	ARPP21	(((..((((((...(((((((((.&)))))))))...)).))))...))).	2621	2647	1	-22.9	1	0.140652	0.515	0.909678	0.863396	-16.5814	18	26	9	3UTR		0	0
hsa-miR-1291	NM_001267618	ARPP21	(((..((((((...(((((((((.&)))))))))...)).))))...))).	1910	1936	1	-22.9	1	0.140652	0.515	0.909678	0.863396	-16.5814	18	26	9	3UTR		0	0
hsa-miR-1291	NM_001267706	CD274	.((((((((.((((..((......&))..)))))))))))).	652	669	1	-22.2	1	0.000283228	0.426	0.872479	0.643502	-6.00433	14	17	12	3UTR		0	0
hsa-miR-1291	NM_001267706	CD274	...(((((..((((((.(((.(((&))).))).))))))..))))).	612	634	1	-22.9	1	0.000606207	0.529	0.228158	0.569652	-8.81344	17	22	6	3UTR		0	0
hsa-miR-1291	NM_001267843	CLOCK	...((((((((....(((((((((&)))))).))).....)))))))).	5364	5388	1	-25.1	1	0.000142216	0.588	0.268522	0.640755	-12.7428	17	24	8	3UTR		0	0
hsa-miR-1291	NM_001267843	CLOCK	...((((((..(((..((((((((&))))).)))..))).)))))).	8576	8598	1	-24	1	1.14311e-06	0.647	2.26235	3.13357	-11.5503	17	22	6	3UTR		0	0
hsa-miR-1291	NM_001270042	DYDC2	.((.(((((((((((...(((((.&.)))))...)))))..)))))))).	1321	1362	1	-21.9	1	0.0142403	0.603	0.0836506	-0.0515669	-7.0584	18	25	8	3UTR		0	0
hsa-miR-1291	NM_001270367	TMEM254	(((((((((((((((...((((((&.)))))).)))))).))))))))).	1143	1199	1	-32.4	1	0.000798864	0.485	0.127838	-0.253916	-4.17062	21	25	9	3UTR		0	1
hsa-miR-1291	NM_001270370	TMEM254	(((((((((((((((...((((((&.)))))).)))))).))))))))).	1183	1239	1	-32.4	1	0.000798864	0.485	-0.252209	-0.14033	-4.17062	21	25	9	3UTR		0	1
hsa-miR-1291	NM_001270371	TMEM254	(((((((((((((((...((((((&.)))))).)))))).))))))))).	1198	1254	1	-32.4	1	0.000798864	0.485	-0.252209	-0.14033	-4.17062	21	25	9	3UTR		0	1
hsa-miR-1291	NM_001270373	TMEM254	(((((((((((((((...((((((&.)))))).)))))).))))))))).	1155	1211	1	-32.4	1	0.000798864	0.485	-0.252209	-0.14033	-4.17062	21	25	9	3UTR		0	1
hsa-miR-1291	NM_001270383	ENKUR	.(((((((((((..((((.((...&.)).))))..)))....................)))))).)).	1919	1968	1	-22.3	1	0.00681993	0.456	0.593816	0.216272	-5.9393	17	43	6	3UTR		0	0
hsa-miR-1291	NM_001270407	JAM2	.(.((((((((((.(((..((...&))...)))..)))))))))).).	2236	2259	1	-21.2	1	5.94913e-06	0.485	-0.161	-0.16925	-6.2077	16	23	10	3UTR		0	0
hsa-miR-1291	NM_001270436	CDC42EP3	((((((.(..(((((.((((((..&.)))))).)))))..))))))).	2958	3007	1	-26.4	1	0.00124702	0.529	1.65857	2.07342	-8.01321	18	23	7	3UTR		0	0
hsa-miR-1291	NM_001270438	CDC42EP3	((((((.(..(((((.((((((..&.)))))).)))))..))))))).	2990	3039	1	-26.4	1	0.00124702	0.529	0.778127	1.58917	-8.01321	18	23	7	3UTR		0	0
hsa-miR-1291	NM_001270455	WWP2	.(((((((.(((((....((((.(&).)))).....)))))))))))).	1364	1388	1	-23	1	0.00010615	0.5	0.779728	0.261488	-5.81821	17	24	12	3UTR		0	0
hsa-miR-1291	NM_001270508	TNFAIP3	..((((((((....((((((....&))))))...)))))))).	3560	3578	1	-22.2	1	0.00649769	0.647	0.285301	0.430367	-13.2745	14	18	8	3UTR		0	0
hsa-miR-1291	NM_001270601	ASCL5	..((((((.((((((.((((((((&))))))))..)).......................))))))).))).	1152	1199	1	-24.2	1	0.00142135	0.338	3.01549	1.69964	-6.24644	20	47	8	3UTR		0	0
hsa-miR-1291	NM_001270660	MARCHF6	..(((((.((((((..(((((...&)))))..))))))))))).	3517	3536	1	-26.5	1	0.0172727	0.588	0.824031	0.871197	-8.23913	16	19	11	3UTR		0	0
hsa-miR-1291	NM_001270661	MARCHF6	..(((((.((((((..(((((...&)))))..))))))))))).	3346	3365	1	-26.5	1	0.0172727	0.588	0.824031	0.871197	-8.23913	16	19	11	3UTR		0	0
hsa-miR-1291	NM_001270708	NRM	.((((((((((((((.(((((.((&)).)))))))))...........)))....))))))).	1008	1046	1	-23.7	1	3.35455e-06	0.412	2.66473	1.7886	-4.02637	21	38	9	3UTR		0	0
hsa-miR-1291	NM_001270709	NRM	.((((((((((((((.(((((.((&)).)))))))))...........)))....))))))).	986	1024	1	-23.7	1	3.35455e-06	0.412	2.66473	1.7886	-4.02637	21	38	9	3UTR		0	0
hsa-miR-1291	NM_001270710	NRM	.((((((((((((((.(((((.((&)).)))))))))...........)))....))))))).	789	827	1	-23.7	1	3.35455e-06	0.412	3.75222	2.87483	-4.02637	21	38	9	3UTR		0	0
hsa-miR-1291	NM_001270781	GZMH	.(((((((((((...(((......&.)))...))))))))))).	596	641	1	-24.1	1	0.000489911	0.456	0.628209	-0.10473	-6.67474	14	19	11	3UTR		0	0
hsa-miR-1291	NM_001270782	TFAM	.(((((((((((.(((((((((((&))))))))))))))))...............)))).)).	1291	1330	1	-22.9	1	0.00429912	0.706	0.506643	1.19927	-5.08246	22	39	16	3UTR		0	0
hsa-miR-1291	NM_001270876	MEAF6	..(((((((.(((.((.(((((..&))))).)).))).))))))).	4146	4167	1	-24.3	1	7.61863e-05	0.382	3.9809	5.66307	-7.05635	17	21	7	3UTR		0	0
hsa-miR-1291	NM_001270897	TRAPPC3	.((.((((.((((...((((((((&))))))))..)))))))))).	487	508	1	-24.8	1	0.00117785	0.426	1.04342	1.20706	-9.70708	18	21	10	3UTR		0	0
hsa-miR-1291	NM_001271010	FLI1	((((((((.((((.(((.(((.((&))))).)))......))))..)))))))).	2509	2539	1	-23.8	1	0.0124841	0.529	1.53941	1.19368	-5.8508	20	30	8	3UTR		0	0
hsa-miR-1291	NM_001271012	FLI1	((((((((.((((.(((.(((.((&))))).)))......))))..)))))))).	1941	1971	1	-23.8	1	0.0124841	0.529	3.58768	6.11735	-5.8508	20	30	8	3UTR		0	0
hsa-miR-1291	NM_001271052	ADGRE2	.(((.((((((..((.((((((((&))))))))))......)))))).))).	5009	5036	1	-24.2	1	0.00026292	0.559	0.889604	-0.283	-12.7813	19	27	10	3UTR		0	0
hsa-miR-1291	NM_001271161	PGR	.((((((((((.(((((((((((.&))))))............))))).)))).)))))).	5852	5888	1	-28.3	1	0.00109955	0.647	-0.0100472	0.130323	-7.14013	21	36	6	3UTR		0	0
hsa-miR-1291	NM_001271539	SEL1L2	.(((((((((.(.((((..(((((&))))).)))).).).)))))))).	1900	1924	1	-23	1	1.74051e-07	0.441	1.17993	1.37156	-7.90723	19	24	8	3UTR		0	0
hsa-miR-1291	NM_001271581	DNAJC10	(((.((.(((((((..(((((...&))))).)))))))...)).))).	3010	3033	1	-24.7	1	0.000694661	0.515	-0.0205951	0.301692	-9.48178	17	23	7	3UTR		0	0
hsa-miR-1291	NM_001271594	SESN3	(.((((((...(((((((.(((..&)))))))))))))))).).	4164	4183	1	-21.9	1	0.00363497	0.676	0.2687	0.342434	-10.2249	17	19	16	3UTR		0	0
hsa-miR-1291	NM_001271629	MEF2D	.(.((((.((((((((((..(...&)..)))))))))).))).).).	2777	2799	1	-27.1	1	2.82564e-05	0.353	0.192836	0.0310909	-7.6645	16	22	10	3UTR		0	0
hsa-miR-1291	NM_001271634	CNOT9	..(((((..(......((((((((&)))))))).......)..))))).	1754	1778	1	-22.4	1	0.178326	0.515	1.25922	1.41928	-17.6131	14	24	8	3UTR		0	0
hsa-miR-1291	NM_001271684	SLC35A3	.((((((((.((..((((((....&))))))..))........)))))))).	7606	7633	1	-22.9	1	7.3786e-05	0.529	0.0455216	-0.0466807	-7.1818	16	27	8	3UTR		0	0
hsa-miR-1291	NM_001271711	SLC2A8	.(((((((((((((..((((((.(&).))))))...))))))))..........).)))).	1681	1717	1	-24.8	1	0.000231542	0.456	0.192381	-0.197877	-4.76182	20	36	8	3UTR		0	0
hsa-miR-1291	NM_001271712	SLC2A8	.(((((((((((((..((((((.(&).))))))...))))))))..........).)))).	1457	1493	1	-24.8	1	0.000231542	0.456	0.192381	-0.197877	-4.76182	20	36	8	3UTR		0	0
hsa-miR-1291	NM_001271732	YIPF5	((((((..(((((.(.(((.((..&.))))).).))))))))))).	1048	1074	1	-21.3	1	0.000123721	0.618	0.106323	0.709384	-8.88478	17	21	11	3UTR		0	0
hsa-miR-1291	NM_001271733	MST1L	(((.((((.((((((((((((...&))))))))))))...))))))).	3263	3286	1	-30.7	1	9.79903e-06	0.5	1.07848	2.01406	-8.02599	19	23	12	3UTR		0	0
hsa-miR-1291	NM_001271826	PUS7L	(((((((((((.............&))))))))))).	12028	12040	1	-22.7	1	7.8964e-06	0.618	3.35103	3.19045	-10.3988	11	12	11	3UTR		0	0
hsa-miR-1291	NM_001271834	RSRC1	((((((((.((((((((.......&.))))))))..))))...)))).	2130	2185	1	-21.5	1	0.000677001	0.647	0	0	-4.99396	16	23	8	3UTR		0	0
hsa-miR-1291	NM_001271854	GPR176	((((((((((((.((.........&)).)))))))))))).	2499	2515	1	-23.9	1	3.40462e-08	0.485	3.66961	3.31143	-5.45975	14	16	12	3UTR		0	0
hsa-miR-1291	NM_001271900	PPP2R2B	...((((((((.......((((((&))))))......)))))))).	9102	9123	1	-22.3	1	0.00260135	0.5	1.4831	2.12585	-12.9758	14	21	8	3UTR		0	0
hsa-miR-1291	NM_001271904	GSKIP	.((((((..((((((.........&)))))).)))))).	1066	1080	1	-17.6	1	0.000140797	0.559	-0.315707	2.01927	-7.3964	12	14	6	3UTR		0	0
hsa-miR-1291	NM_001271937	RMND1	..((((((.(((.((....(((((&))))).)).))).)))))).	1265	1285	1	-21.6	1	0.00203301	0.529	3.56318	2.83092	-7.53557	16	20	6	3UTR		0	0
hsa-miR-1291	NM_001271953	TPGS2	((((((((.(((.(.(((.(((((&))))).).)).).))))))).)))).	940	966	1	-23.5	1	7.78121e-05	0.412	2.492	2.72278	-7.01854	20	26	7	3UTR		0	0
hsa-miR-1291	NM_001271978	STK25	(((((((.((((...(((((((((&)))))))))..)))).)))................)))).	2998	3038	1	-28.2	1	0.00303916	0.412	2.06211	1.82767	-9.13263	20	40	9	3UTR		0	0
hsa-miR-1291	NM_001272042	RPS6KB1	...((((.(((...(((((.((((&))))))))).....))).)))).	2572	2595	1	-23	1	0.0212954	0.529	2.19348	1.5293	-14.3209	16	23	9	3UTR		0	0
hsa-miR-1291	NM_001272043	RPS6KB1	...((((.(((...(((((.((((&))))))))).....))).)))).	1605	1628	1	-23	1	0.0212954	0.529	1.28977	1.1151	-14.3209	16	23	9	3UTR		0	0
hsa-miR-1291	NM_001272044	RPS6KB1	...((((.(((...(((((.((((&))))))))).....))).)))).	2770	2793	1	-23	1	0.0212954	0.529	2.19348	1.5293	-14.3209	16	23	9	3UTR		0	0
hsa-miR-1291	NM_001276252	WDTC1	.(((((.((((((((.(((((((.&))))))).))))))..)).))))).	2614	2639	1	-26.9	1	0.000114338	0.441	1.55046	1.40066	-5.57006	20	25	7	3UTR		0	0
hsa-miR-1291	NM_001276277	PPIP5K2	(((.(((.((((.(((((.(((((&))))).))))))))).))).))).	8868	8892	1	-24.4	1	0.000498764	0.662	0.171987	0.0544733	-10.5724	20	24	9	3UTR		0	0
hsa-miR-1291	NM_001276277	PPIP5K2	.((((.((((((.((((...((..&))...)))))))))).)))).	9513	9534	1	-22.9	1	0.000338652	0.441	0.529657	-0.137486	-6.98341	16	21	10	3UTR		0	0
hsa-miR-1291	NM_001276348	C1orf100	...(((((.((((.(((((((...&)))))))...))))..))))).	610	632	1	-21.9	1	0.013308	0.647	0.416	0.2281	-8.42777	16	22	7	3UTR		0	0
hsa-miR-1291	NM_001276435	KCNJ15	(((((((.((((..((((.((((.&))))..))))))))))))))).	2763	2785	1	-23.8	1	2.14196e-07	0.515	-0.520151	-0.090123	-8.39718	19	22	15	3UTR		0	0
hsa-miR-1291	NM_001276436	KCNJ15	(((((((.((((..((((.((((.&))))..))))))))))))))).	2766	2788	1	-23.8	1	2.14196e-07	0.515	-0.520151	-0.090123	-8.39718	19	22	15	3UTR		0	0
hsa-miR-1291	NM_001276453	KPNB1	.(((((.(((((..(((((((...&))))))).....)))))..)).))).	5214	5240	1	-24.1	1	0.00351499	0.515	0.853544	1.17552	-7.48298	17	26	7	3UTR		0	0
hsa-miR-1291	NM_001276471	CORO1C	.((((((((..((.(.((((((..&))))).).).))..)))))))).	2807	2830	1	-23.5	1	0.000311862	0.397	4.46647	5.74924	-8.95049	17	23	8	3UTR		0	0
hsa-miR-1291	NM_001276698	TP53	.(((((.((.((.((((((((...&))))))))))...))..))))).	1920	1943	1	-25.2	1	3.0635e-05	0.397	1.81898	2.6854	-7.86865	17	23	10	3UTR		0	0
hsa-miR-1291	NM_001276699	TP53	.(((((.((.((.((((((((...&))))))))))...))..))))).	1847	1870	1	-25.2	1	3.0635e-05	0.397	1.81898	2.6854	-7.86865	17	23	10	3UTR		0	0
hsa-miR-1291	NM_001276761	TP53	..((((.(((((..(((((((((.&)))))))))...................))))))))).	1847	1885	1	-25.2	1	0.00356352	0.471	3.92001	3.56784	-8.64666	18	38	9	3UTR		0	0
hsa-miR-1291	NM_001276761	TP53	.(((((.((.((.((((((((...&))))))))))...))..))))).	2293	2316	1	-25.2	1	3.0635e-05	0.397	0.45737	0.666819	-7.86865	17	23	10	3UTR		0	0
hsa-miR-1291	NM_001277081	KLK15	.((((((...(((((..(((((((&))))))).))))).)))))).	1227	1248	1	-23.1	1	0.00543342	0.618	1.22967	1.10458	-8.6389	18	21	7	3UTR		0	0
hsa-miR-1291	NM_001277082	KLK15	.((((((...(((((..(((((((&))))))).))))).)))))).	1090	1111	1	-23.1	1	0.00543342	0.618	1.22967	1.10458	-8.6389	18	21	7	3UTR		0	0
hsa-miR-1291	NM_001277291	ZNF891	((((((((((((............&)))))))))))).	9444	9457	1	-23.4	1	0.0115804	0.471	0	0	-7.05204	12	13	12	3UTR		0	0
hsa-miR-1291	NM_001277353	MGAT4D	...(((((((...((.(.(((...&))).)))...))))))).	1515	1533	1	-18.2	1	0.00255827	0.603	4.2108	2.30971	-14.2083	13	18	7	3UTR		0	0
hsa-miR-1291	NM_001277783	ATG12	(((((((..((((((((((((...&)))))).......))))))))))))).	3746	3773	1	-22.9	1	0.000901599	0.662	2.16465	3.20976	-7.3076	19	27	13	3UTR		0	0
hsa-miR-1291	NM_001277842	CCNT1	.(((((((((((((((...((...&))...))))))))))...................))))).	1159	1199	1	-20.5	1	1.88963e-05	0.544	0.965035	0.779098	-3.79332	17	40	10	3UTR		0	0
hsa-miR-1291	NM_001278054	CASP9	.(((((.((.((.((((((((...&.))))))))))...))..))))).	1592	1629	1	-24.9	1	0.00927647	0.456	3.53337	2.25535	-7.86865	17	24	10	3UTR		0	0
hsa-miR-1291	NM_001278098	GDNF	(((((((((((....(((..((..&))..)))))))))))))).	2440	2459	1	-24.7	1	1.48705e-06	0.426	0.316799	0.787912	-10.1658	16	19	14	3UTR		0	0
hsa-miR-1291	NM_001278113	ADAM2	..(((((.(((((.(((((((((.&))))))))).................))))).))))).	2448	2486	1	-25.6	1	0.00255547	0.647	0.198005	0.362567	-8.12748	19	38	9	3UTR		0	0
hsa-miR-1291	NM_001278114	ADAM2	..(((((.(((((.(((((((((.&))))))))).................))))).))))).	2316	2354	1	-25.6	1	0.00255547	0.647	0.198005	0.362567	-8.12748	19	38	9	3UTR		0	0
hsa-miR-1291	NM_001278165	NBL1	.(((((((((((....(((((((.&)))).))).))))))))))).	1782	1803	1	-24.6	1	3.21557e-05	0.441	-0.107044	-0.463421	-6.90779	18	21	11	3UTR		0	0
hsa-miR-1291	NM_001278166	NBL1	.(((((((((((....(((((((.&)))).))).))))))))))).	1626	1647	1	-24.6	1	3.21557e-05	0.441	-0.107044	-0.463421	-6.90779	18	21	11	3UTR		0	0
hsa-miR-1291	NM_001278170	ZNF33A	.(((((((.(((.(((.((((.((&)).)))).))).)).).))))))).	3767	3792	1	-24.6	1	0.00035437	0.456	-0.145663	-0.0357333	-6.13885	19	25	7	3UTR		0	0
hsa-miR-1291	NM_001278172	SDHC	.((((((((.(((((((.......&))))))).)))))))).	1726	1743	1	-24.9	1	0.000209454	0.588	-0.21461	-0.164554	-5.03583	15	17	8	3UTR		0	0
hsa-miR-1291	NM_001278172	SDHC	.((((((....((((((((((...&)))))))))))))).)).	2810	2828	1	-25.6	1	8.78138e-06	0.426	-0.024562	0.583329	-11.2306	16	18	14	3UTR		0	0
hsa-miR-1291	NM_001278173	ZNF33A	.(((((((.(((.(((.((((.((&)).)))).))).)).).))))))).	3927	3952	1	-24.6	1	0.00035437	0.456	-0.145663	-0.0357333	-6.13885	19	25	7	3UTR		0	0
hsa-miR-1291	NM_001278178	ZNF33A	.(((((((.(((.(((.((((.((&)).)))).))).)).).))))))).	3853	3878	1	-24.6	1	0.00035437	0.456	-0.145663	-0.0357333	-6.13885	19	25	7	3UTR		0	0
hsa-miR-1291	NM_001278189	TPM3	(((((((((..(.((((((.((..&))))))))).))))))))).	2093	2113	1	-23.3	1	4.3578e-07	0.588	2.23194	1.67614	-9.29399	18	20	9	3UTR		0	0
hsa-miR-1291	NM_001278190	TPM3	(((((((((..(.((((((.((..&))))))))).))))))))).	1951	1971	1	-23.3	1	4.3578e-07	0.588	0.935653	1.08805	-9.29399	18	20	9	3UTR		0	0
hsa-miR-1291	NM_001278221	PHF7	((((((((.((........(((((&)))))..........)))))))))).	1768	1794	1	-22.2	1	0.00672675	0.456	0.255342	0.263465	-11.4552	15	26	10	3UTR		0	0
hsa-miR-1291	NM_001278243	ZFAND5	((((.(...(((((..((((((..&))))))..)).)))....).)))).	4787	4812	1	-21.4	1	0.000460252	0.426	3.77535	4.46516	-13.9388	16	25	6	3UTR		0	0
hsa-miR-1291	NM_001278244	ZFAND5	((((.(...(((((..((((((..&))))))..)).)))....).)))).	4686	4711	1	-21.4	1	0.000460252	0.426	5.75117	5.90185	-13.9388	16	25	6	3UTR		0	0
hsa-miR-1291	NM_001278275	E2F6	.((((((((((((....(((((((&)))))))..))))))...)))))).	2121	2146	1	-23.4	1	0.000340766	0.515	0.693611	-0.112762	-5.61866	19	25	7	3UTR		0	0
hsa-miR-1291	NM_001278278	E2F6	.((((((((((((....(((((((&)))))))..))))))...)))))).	1995	2020	1	-23.4	1	0.000340766	0.515	0.0575288	-0.465456	-5.61866	19	25	7	3UTR		0	0
hsa-miR-1291	NM_001278279	MRPL45	(((....((((((((.((((((((&))))))))...))))..))))..))).	826	853	1	-20.8	0	0.00971252	0.529	3.81844	3.75439	-14.7663	19	27	8	3UTR		0	0
hsa-miR-1291	NM_001278344	ACTN2	....(((((((((.(((((.((((&))))..)))))...)))))))).).	3687	3712	1	-23.6	1	0.00295107	0.603	0.229664	0.0416832	-10.4034	18	25	8	3UTR		0	0
hsa-miR-1291	NM_001278359	RHOH	..((((((.((.((..(((((...&))))).)).)))))))).	2643	2661	1	-25.7	1	0.000167234	0.426	0	0	-10.3287	15	18	8	3UTR		0	0
hsa-miR-1291	NM_001278359	RHOH	(((((((((....(.(((.(((..&))).))).)))))))))).	3539	3558	1	-25.1	1	0.000109496	0.515	0	0	-13.3762	16	19	10	3UTR		0	0
hsa-miR-1291	NM_001278360	RHOH	..((((((.((.((..(((((...&))))).)).)))))))).	2629	2647	1	-25.7	1	0.000167234	0.426	0	0	-10.3287	15	18	8	3UTR		0	0
hsa-miR-1291	NM_001278360	RHOH	(((((((((....(.(((.(((..&))).))).)))))))))).	3525	3544	1	-25.1	1	0.000109496	0.515	0	0	-13.3762	16	19	10	3UTR		0	0
hsa-miR-1291	NM_001278361	RHOH	..((((((.((.((..(((((...&))))).)).)))))))).	2605	2623	1	-25.7	1	0.000167234	0.426	0	0	-10.3287	15	18	8	3UTR		0	0
hsa-miR-1291	NM_001278361	RHOH	(((((((((....(.(((.(((..&))).))).)))))))))).	3501	3520	1	-25.1	1	0.000109496	0.515	0	0	-13.3762	16	19	10	3UTR		0	0
hsa-miR-1291	NM_001278362	RHOH	..((((((.((.((..(((((...&))))).)).)))))))).	2531	2549	1	-25.7	1	0.000167234	0.426	0	0	-10.3287	15	18	8	3UTR		0	0
hsa-miR-1291	NM_001278362	RHOH	(((((((((....(.(((.(((..&))).))).)))))))))).	3427	3446	1	-25.1	1	0.000109496	0.515	0	0	-13.3762	16	19	10	3UTR		0	0
hsa-miR-1291	NM_001278363	RHOH	..((((((.((.((..(((((...&))))).)).)))))))).	2489	2507	1	-25.7	1	0.000167234	0.426	0	0	-10.3287	15	18	8	3UTR		0	0
hsa-miR-1291	NM_001278363	RHOH	(((((((((....(.(((.(((..&))).))).)))))))))).	3385	3404	1	-25.1	1	0.000109496	0.515	0	0	-13.3762	16	19	10	3UTR		0	0
hsa-miR-1291	NM_001278364	RHOH	..((((((.((.((..(((((...&))))).)).)))))))).	2734	2752	1	-25.7	1	0.000167234	0.426	0	0	-10.3287	15	18	8	3UTR		0	0
hsa-miR-1291	NM_001278364	RHOH	(((((((((....(.(((.(((..&))).))).)))))))))).	3630	3649	1	-25.1	1	0.000109496	0.515	0	0	-13.3762	16	19	10	3UTR		0	0
hsa-miR-1291	NM_001278367	RHOH	..((((((.((.((..(((((...&))))).)).)))))))).	2372	2390	1	-25.7	1	0.000167234	0.426	0	0	-10.3287	15	18	8	3UTR		0	0
hsa-miR-1291	NM_001278367	RHOH	(((((((((....(.(((.(((..&))).))).)))))))))).	3268	3287	1	-25.1	1	0.000109496	0.515	0	0	-13.3762	16	19	10	3UTR		0	0
hsa-miR-1291	NM_001278368	RHOH	..((((((.((.((..(((((...&))))).)).)))))))).	2466	2484	1	-25.7	1	0.000167234	0.426	-0.0339843	0.20713	-10.3287	15	18	8	3UTR		0	0
hsa-miR-1291	NM_001278368	RHOH	(((((((((....(.(((.(((..&))).))).)))))))))).	3362	3381	1	-25.1	1	0.000109496	0.515	0.292307	-0.3205	-13.3762	16	19	10	3UTR		0	0
hsa-miR-1291	NM_001278369	RHOH	..((((((.((.((..(((((...&))))).)).)))))))).	2357	2375	1	-25.7	1	0.000167234	0.426	0	0	-10.3287	15	18	8	3UTR		0	0
hsa-miR-1291	NM_001278369	RHOH	(((((((((....(.(((.(((..&))).))).)))))))))).	3253	3272	1	-25.1	1	0.000109496	0.515	0	0	-13.3762	16	19	10	3UTR		0	0
hsa-miR-1291	NM_001278370	MPP2	(((((((..((((...((((((((&)))))))).)))).))))))).	2800	2822	1	-27.4	1	0.000333117	0.353	2.50468	5.05071	-9.13294	19	22	8	3UTR		0	1
hsa-miR-1291	NM_001278371	MPP2	(((((((..((((...((((((((&)))))))).)))).))))))).	2736	2758	1	-27.4	1	0.000333117	0.353	3.24791	4.5399	-9.13294	19	22	8	3UTR		0	1
hsa-miR-1291	NM_001278372	MPP2	(((((((..((((...((((((((&)))))))).)))).))))))).	2765	2787	1	-27.4	1	0.000333117	0.353	5.07739	4.08999	-9.13294	19	22	8	3UTR		0	1
hsa-miR-1291	NM_001278373	MPP2	(((((((..((((...((((((((&)))))))).)))).))))))).	2629	2651	1	-27.4	1	0.000333117	0.353	2.53838	3.25386	-9.13294	19	22	8	3UTR		0	1
hsa-miR-1291	NM_001278374	MPP2	(((((((..((((...((((((((&)))))))).)))).))))))).	2574	2596	1	-27.4	1	0.000333117	0.353	3.61231	3.63802	-9.13294	19	22	8	3UTR		0	1
hsa-miR-1291	NM_001278375	MPP2	(((((((..((((...((((((((&)))))))).)))).))))))).	2847	2869	1	-27.4	1	0.000333117	0.353	4.48662	3.87679	-9.13294	19	22	8	3UTR		0	1
hsa-miR-1291	NM_001278376	MPP2	(((((((..((((...((((((((&)))))))).)))).))))))).	2720	2742	1	-27.4	1	0.000333117	0.353	4.58097	4.45193	-9.13294	19	22	8	3UTR		0	1
hsa-miR-1291	NM_001278381	MPP2	(((((((..((((...((((((((&)))))))).)))).))))))).	3026	3048	1	-27.4	1	0.000333117	0.353	5.30454	3.93378	-9.13294	19	22	8	3UTR		0	1
hsa-miR-1291	NM_001278409	ANXA11	....((((((((((..(((((((.&))))).))..)))))))))).	6160	6181	1	-27.5	1	0.00382315	0.485	2.31881	2.66627	-10.5151	17	21	10	3UTR		0	0
hsa-miR-1291	NM_001278423	PKD1L2	...((((((((....((((((((.&)))))))).....)))).)))).	1073	1096	1	-24.2	1	6.1174e-06	0.544	1.48554	1.00454	-12.7428	16	23	8	3UTR		0	0
hsa-miR-1291	NM_001278426	LILRB4	(((((((((..(((.((.(((((.&))))).)).)))))))))))).	2923	2945	1	-26.4	1	0.000919456	0.574	0.0996928	-0.0982364	-8.7403	19	22	12	3UTR		0	0
hsa-miR-1291	NM_001278427	LILRB4	(((((((((..(((.((.(((((.&))))).)).)))))))))))).	2920	2942	1	-26.4	1	0.000919456	0.574	0.0996928	-0.0954089	-8.7403	19	22	12	3UTR		0	0
hsa-miR-1291	NM_001278460	COBLL1	.((((.(.((((....(((((((.&)))))).)....)))).).)))).	7912	7936	1	-21.4	1	4.62068e-05	0.515	1.84634	1.42849	-11.1224	16	24	6	3UTR		0	0
hsa-miR-1291	NM_001278516	MDM4	.(((((.((.((.((((((((...&))))))))))...))..))))).	2606	2629	1	-22	1	0.000148437	0.441	-0.143583	0.109004	-7.86865	17	23	10	3UTR		0	0
hsa-miR-1291	NM_001278517	MDM4	.(((((.((.((.((((((((...&))))))))))...))..))))).	2380	2403	1	-22	1	0.000148437	0.441	-0.143583	0.109004	-7.86865	17	23	10	3UTR		0	0
hsa-miR-1291	NM_001278518	MDM4	.(((((.((.((.((((((((...&))))))))))...))..))))).	2195	2218	1	-22	1	0.000148437	0.441	-0.143583	0.109004	-7.86865	17	23	10	3UTR		0	0
hsa-miR-1291	NM_001278519	MDM4	.(((((.((.((.((((((((...&))))))))))...))..))))).	2005	2028	1	-22	1	0.000148437	0.441	-0.143583	0.109004	-7.86865	17	23	10	3UTR		0	0
hsa-miR-1291	NM_001278536	RCHY1	.(((((.((.(.(((((((((...&))))))))).)..))..))))).	2537	2560	1	-26.1	1	0.000676965	0.485	0.465377	-0.00637605	-9.92632	17	23	9	3UTR		0	0
hsa-miR-1291	NM_001278549	PDK1	((((((((((((.(((((((((((&))))))))))).)..............................))))............................))))))).	8589	8672	1	-27.1	1	6.26151e-06	0.515	0.341851	0.237411	-5.22671	23	83	11	3UTR		0	0
hsa-miR-1291	NM_001278558	WSB2	((((((((((((.....((((((.&)))))))))))))...............))))).	1426	1460	1	-21.4	1	0.000202601	0.471	0.0821788	0.398709	-7.05204	18	34	13	3UTR		0	0
hsa-miR-1291	NM_001278575	THEG5	.((((.((((.(((..(((((...&)))))......))).)).)).)))).	1106	1132	1	-18.5	1	0.0172758	0.618	1.68231	1.53107	-9.48756	16	26	5	3UTR		0	0
hsa-miR-1291	NM_001278578	THEG5	.((((.((((.(((..(((((...&)))))......))).)).)).)))).	1099	1125	1	-18.5	1	0.0172758	0.618	1.68231	1.53107	-9.48756	16	26	5	3UTR		0	0
hsa-miR-1291	NM_001278612	EIF1AY	((((((((((((.((((((.....&.)))).)).))))))))......)))).	512	546	1	-20.6	1	0.000301619	0.603	3.92634	2.44729	-5.22671	18	28	8	3UTR		0	0
hsa-miR-1291	NM_001278618	PTPN1	.(((((((.(((...((((((((.&)))..))))).)))))))))).	2395	2417	1	-24.4	1	6.61854e-08	0.441	0.877081	1.02984	-7.73113	18	22	10	3UTR		0	0
hsa-miR-1291	NM_001278672	NFATC1	((((((((((((((((.((((...&)))))))))..)))))))................)))).	3889	3928	1	-21.3	1	0.00727245	0.642	1.9843	1.82442	-3.93757	20	39	9	3UTR		0	0
hsa-miR-1291	NM_001278686	TGIF1	((((((((..((((((((.((((.&))))..)))....))))))))))).)).	2559	2587	1	-20.5	1	0.000114479	0.426	-0.434688	-0.193085	-6.23647	20	28	11	3UTR		0	0
hsa-miR-1291	NM_001278687	SSTR3	(((((((((((.....(((((.((&)).)))))..)))))).))))).	3416	3439	1	-25.7	1	0.000577484	0.382	0	0	-10.3988	18	23	6	3UTR		0	0
hsa-miR-1291	NM_001278687	SSTR3	.(((((((((((((((((((....&)))).)))))))......)))))))).	3123	3150	1	-25.4	1	0.000159538	0.426	0	0	-3.79332	19	27	8	3UTR		0	0
hsa-miR-1291	NM_001278716	FBXL4	.(((((.((.(.((((((((((..&)))))))))).)..))..))))).	7152	7176	1	-24.4	1	0.000553281	0.544	4.22971	4.71992	-9.92632	18	24	10	3UTR		0	0
hsa-miR-1291	NM_001278789	GORASP1	.(((((((.(((..((((((.(((&)))))))))...................)))))))))).	1322	1361	1	-25	1	0.000172987	0.426	-1.09622	-0.347203	-6.99569	19	39	10	3UTR		0	0
hsa-miR-1291	NM_001278790	GORASP1	.(((((((.(((..((((((.(((&)))))))))...................)))))))))).	1142	1181	1	-25	1	0.000172987	0.426	-0.666104	-0.2472	-6.99569	19	39	10	3UTR		0	0
hsa-miR-1291	NM_001280550	PAX5	((((((....((((((.((((((.&))))))))))))....)))))).	7310	7333	1	-26.5	1	6.45094e-05	0.412	2.64469	3.04072	-10.0938	18	23	12	3UTR		0	1
hsa-miR-1291	NM_001280551	PAX5	((((((....((((((.((((((.&))))))))))))....)))))).	7274	7297	1	-26.5	1	6.45094e-05	0.412	0.153459	2.42029	-10.0938	18	23	12	3UTR		0	1
hsa-miR-1291	NM_001280552	PAX5	(((((((..(((((((((((((((&)))))))).))))))).)).))))).	5574	5600	1	-30.2	1	5.45582e-05	0.412	0.202258	0.172394	-7.3076	22	26	8	3UTR		0	1
hsa-miR-1291	NM_001280554	PAX5	(((((((..(((((((((((((((&)))))))).))))))).)).))))).	5634	5660	1	-30.2	1	5.45582e-05	0.412	0.202258	0.218185	-7.3076	22	26	8	3UTR		0	1
hsa-miR-1291	NM_001280555	PAX5	((((((....((((((.((((((.&))))))))))))....)))))).	7329	7352	1	-26.5	1	6.45094e-05	0.412	2.8729	3.8143	-10.0938	18	23	12	3UTR		0	1
hsa-miR-1291	NM_001280556	PAX5	(((((((..(((((((((((((((&)))))))).))))))).)).))))).	5597	5623	1	-30.2	1	5.45582e-05	0.412	0.167416	0.13357	-7.3076	22	26	8	3UTR		0	1
hsa-miR-1291	NM_001281458	SLC35C2	(((((((........((((((((.&))))))))))))))).	5490	5506	1	-25	1	0.000242524	0.412	0	0	-17.6031	15	16	15	3UTR		0	0
hsa-miR-1291	NM_001281471	PPIP5K2	(((.(((.((((.(((((.(((((&))))).))))))))).))).))).	8973	8997	1	-24.4	1	0.000498764	0.662	0.171987	0.0544733	-10.5724	20	24	9	3UTR		0	0
hsa-miR-1291	NM_001281471	PPIP5K2	.((((.((((((.((((...((..&))...)))))))))).)))).	9618	9639	1	-22.9	1	0.000338652	0.441	0.529657	-0.137486	-6.98341	16	21	10	3UTR		0	0
hsa-miR-1291	NM_001281517	CEP85	.((((((((..(((((..((((((&))))))))))).)))))))).	2778	2799	1	-27	1	0.00204506	0.5	1.38494	0.53734	-7.86061	19	21	11	3UTR		0	0
hsa-miR-1291	NM_001281517	CEP85	.((((((.(((((((.((((.((.&))))))..))))))).)))).)).	3275	3299	1	-26.7	1	0.000310382	0.485	0.151906	0.499012	-6.34001	19	24	7	3UTR		0	0
hsa-miR-1291	NM_001281518	CEP85	.((((((((..(((((..((((((&))))))))))).)))))))).	1390	1411	1	-27	1	0.00204506	0.5	1.38494	0.53734	-7.86061	19	21	11	3UTR		0	0
hsa-miR-1291	NM_001281520	MCM8	.(((((((..((.((((((((...&.)))))))))).....))))))).	6369	6398	1	-27.4	1	9.44099e-05	0.471	0	0	-7.38135	17	24	10	3UTR		0	0
hsa-miR-1291	NM_001281521	MCM8	.(((((((..((.((((((((...&.)))))))))).....))))))).	6435	6464	1	-27.4	1	9.44099e-05	0.471	0	0	-7.38135	17	24	10	3UTR		0	0
hsa-miR-1291	NM_001281522	MCM8	.(((((((..((.((((((((...&.)))))))))).....))))))).	6174	6203	1	-27.4	1	9.44099e-05	0.471	0	0	-7.38135	17	24	10	3UTR		0	0
hsa-miR-1291	NM_001282098	YAP1	.(((((((((((((((........&))))))))))))))).	4592	4608	1	-26.2	1	0.0446192	0.647	1.08604	1.50063	-3.79332	15	16	15	3UTR		0	0
hsa-miR-1291	NM_001282099	YAP1	.(((((((((((((((........&))))))))))))))).	4640	4656	1	-26.2	1	0.0446192	0.647	0.88905	1.30792	-3.79332	15	16	15	3UTR		0	0
hsa-miR-1291	NM_001282100	YAP1	.(((((((((((((((........&))))))))))))))).	4706	4722	1	-26.2	1	0.0446192	0.647	0.88905	1.30792	-3.79332	15	16	15	3UTR		0	0
hsa-miR-1291	NM_001282101	YAP1	.(((((((((((((((........&))))))))))))))).	4754	4770	1	-26.2	1	0.0446192	0.647	0.88905	1.30792	-3.79332	15	16	15	3UTR		0	0
hsa-miR-1291	NM_001282146	NLGN4X	(((((((.(((((((.(.(((...&))).).)))))))))))))).	4182	4203	1	-22.2	1	1.31835e-08	0.529	4.74406	5.02545	-6.48426	18	21	14	3UTR		0	0
hsa-miR-1291	NM_001282166	SUV39H1	.((((((((..(((((((.(((((&.)))))..)))))..)).)))))))).	2094	2146	1	-28.4	1	8.33035e-06	0.456	0	0	-7.86061	20	27	8	3UTR		0	0
hsa-miR-1291	NM_001282181	PPP2R5E	..(((.(((((.(((((.(((((.&))))).)))))))))).))).	2890	2911	1	-20.9	1	0.00349946	0.588	-0.0338032	1.66036	-10.2048	18	21	10	3UTR		0	0
hsa-miR-1291	NM_001282195	SLC25A14	.((((((....(.((((((((.((&)).)))))))).)..)))))).	1308	1330	1	-25.7	1	3.22083e-06	0.5	0.579946	0.798443	-12.5198	17	22	8	3UTR		0	0
hsa-miR-1291	NM_001282196	SLC25A14	.((((((....(.((((((((.((&)).)))))))).)..)))))).	1299	1321	1	-25.7	1	3.22083e-06	0.5	0.579946	0.798443	-12.5198	17	22	8	3UTR		0	0
hsa-miR-1291	NM_001282218	BRSK2	((((((((...((((.(((.(((.&))).))).)))))))))))).	2641	2662	1	-26.2	1	3.85624e-08	0.353	0.0542666	-0.108006	-9.29429	18	21	12	3UTR		0	0
hsa-miR-1291	NM_001282218	BRSK2	((((((((.((.....(((((.((&.)).))))))))))))))).	3161	3216	1	-25.7	1	4.59149e-06	0.353	1.13349	1.14444	-11.4552	17	20	15	3UTR		0	0
hsa-miR-1291	NM_001282279	PYCR1	(((((...((.(((((((((((((&)))))))))...)))).))))))).	1506	1531	1	-27.1	1	0.00024663	0.368	2.33325	3.36405	-12.5206	20	25	9	3UTR		0	0
hsa-miR-1291	NM_001282280	PYCR1	(((((...((.(((((((((((((&)))))))))...)))).))))))).	1599	1624	1	-27.1	1	0.00024663	0.368	2.26774	3.23882	-12.5206	20	25	9	3UTR		0	0
hsa-miR-1291	NM_001282281	PYCR1	(((((...((.(((((((((((((&)))))))))...)))).))))))).	1681	1706	1	-27.1	1	0.00024663	0.368	3.08056	2.18215	-12.5206	20	25	9	3UTR		0	0
hsa-miR-1291	NM_001282291	ABCB8	.((((((..(.((((.(((((...&.))))))))).).)))))).	3351	3376	1	-28.3	1	1.82886e-06	0.382	-0.435814	-0.423863	-10.2212	16	20	9	3UTR		0	0
hsa-miR-1291	NM_001282292	ABCB8	.((((((..(.((((.(((((...&.))))))))).).)))))).	3225	3250	1	-28.3	1	1.82886e-06	0.382	-0.435814	-0.423863	-10.2212	16	20	9	3UTR		0	0
hsa-miR-1291	NM_001282307	STK25	(((((((.((((...(((((((((&)))))))))..)))).)))................)))).	2800	2840	1	-28.2	1	0.00303916	0.412	0	0	-9.13263	20	40	9	3UTR		0	0
hsa-miR-1291	NM_001282322	RNF212B	....(((((((...((((((((..&)))).))))...))))))).	1321	1341	1	-19.7	1	0.0332283	0.603	0.272244	0.329998	-15.0393	15	20	7	3UTR		0	0
hsa-miR-1291	NM_001282396	HPCAL4	..((((((.(((.(((((..((((&)))).))))).))).)))))).	4167	4189	1	-27.4	1	0.00109678	0.588	4.62128	6.13038	-7.30252	18	22	6	3UTR		0	1
hsa-miR-1291	NM_001282396	HPCAL4	..((((((.(((..((((.(((((&))))).....))))..))))))))).	3169	3195	1	-24.9	1	0.000118163	0.574	0.915702	0.0808003	-8.15936	18	26	9	3UTR		0	1
hsa-miR-1291	NM_001282397	HPCAL4	..((((((.(((.(((((..((((&)))).))))).))).)))))).	3845	3867	1	-27.4	1	0.00109678	0.588	1.64497	2.68842	-7.30252	18	22	6	3UTR		0	1
hsa-miR-1291	NM_001282402	MIXL1	.(((((((((((....((((((((&.)))..)))))...))))..)))).))).	1442	1484	1	-22.5	1	0.000339059	0.471	-0.156392	0.0313271	-6.90779	19	29	5	3UTR		0	0
hsa-miR-1291	NM_001282406	KCTD14	((((...((((..((((((((...&))))))))..))))..)))).	1010	1031	1	-24.8	1	0.000944096	0.588	1.87666	2.5495	-16.1372	16	21	8	3UTR		0	0
hsa-miR-1291	NM_001282408	IL1RL1	(((((((.((..(..(((......&)))..)..)).))))))).	3225	3244	1	-22.3	1	0.000767034	0.382	-0.493727	-0.191333	-14.0151	13	19	7	3UTR		0	0
hsa-miR-1291	NM_001282426	PIK3CG	((((((((....(((((((((((.&)))))))))))....)))))))).	4090	4114	1	-32.1	1	0.0013813	0.603	0.626471	0.223619	-12.408	19	24	11	3UTR		0	0
hsa-miR-1291	NM_001282427	PIK3CG	((((((((....(((((((((((.&)))))))))))....)))))))).	4014	4038	1	-32.1	1	0.0013813	0.603	0.626471	0.223619	-12.408	19	24	11	3UTR		0	0
hsa-miR-1291	NM_001282436	BLOC1S2	((..((((..(((.((((((((..&)))))))).)))))))..)).	667	688	1	-24.3	1	0.00235537	0.574	0.0506064	0.252992	-11.6829	17	21	8	3UTR		0	0
hsa-miR-1291	NM_001282438	BLOC1S2	((..((((..(((.((((((((..&)))))))).)))))))..)).	561	582	1	-24.3	1	0.00235537	0.574	-0.410611	0.0457877	-11.6829	17	21	8	3UTR		0	0
hsa-miR-1291	NM_001282440	GNA12	.(((((((((((.((.(((.((((&))))))))))))))).........))))).	2636	2666	1	-25.9	1	3.11424e-06	0.324	0.438531	0.228484	-5.3155	20	30	15	3UTR		0	0
hsa-miR-1291	NM_001282441	GNA12	.(((((.(((((..(.(((((.((&))..)))))))))))..))))).	2535	2558	1	-25.6	1	1.98135e-06	0.397	-0.0317248	0.482422	-7.71603	18	23	11	3UTR		0	0
hsa-miR-1291	NM_001282518	ZFP37	.(((((.((.((.((((((((...&.))))))))))....)).))))).	6061	6090	1	-24.5	1	0.00855706	0.471	1.24631	0.970017	-7.86865	17	24	10	3UTR		0	0
hsa-miR-1291	NM_001282535	PNMA3	((((((((((.(.((((.(((((.&))))).))))).)).)))))))).	2364	2388	1	-27.7	1	0.000337167	0.515	0.110049	0.0500504	-8.05148	20	24	8	3UTR		0	1
hsa-miR-1291	NM_001282576	UBE2V1	.((((((((((((((.((((....&)))).))))))........)))))))).	1371	1399	1	-23.8	1	1.34915e-05	0.471	3.33034	3.27755	-4.02637	18	28	8	3UTR		0	0
hsa-miR-1291	NM_001282606	TMBIM4	((((((((.(((((..((......&.))..))))))))))))).	2819	2853	1	-22.3	1	0.000363422	0.471	0	0	-5.96246	15	19	13	3UTR		0	0
hsa-miR-1291	NM_001282609	TMBIM4	((((((((.(((((..((......&.))..))))))))))))).	2643	2677	1	-22.3	1	0.000363422	0.471	0	0	-5.96246	15	19	13	3UTR		0	0
hsa-miR-1291	NM_001282660	MRTFA	(((((((((((...((((......&.))))..))))))))))).	3245	3269	1	-29.1	1	0.000285107	0.456	2.96413	3.26442	-9.43035	15	19	11	3UTR		0	0
hsa-miR-1291	NM_001282710	SLC66A3	(((..(.((((.(((.(((((...&)))))))).)))).)..))).	1211	1232	1	-21	1	0.00141895	0.559	0.155783	-0.0791459	-16.2122	16	21	8	3UTR		0	0
hsa-miR-1291	NM_001282756	MTA3	..(((((((.(.((((((((((..&)))))).)))).).))))))).	3532	3554	1	-26.5	1	1.90919e-05	0.382	0.000471673	-0.110015	-9.54631	18	22	7	3UTR		0	0
hsa-miR-1291	NM_001282807	MARCHF7	.((((.((((..(((((((((((.&)))))))))))..))....))..)))).	3261	3289	1	-20.6	1	0.0305565	0.691	1.38106	0.853005	-11.8659	19	28	11	3UTR		0	0
hsa-miR-1291	NM_001282878	LAX1	..((((((((((((..(((.((((&.)))).)))..)).))....)))))))).	1951	1986	1	-25.5	1	0.000545614	0.544	-0.00251307	0.210469	-5.9255	19	29	8	3UTR		0	0
hsa-miR-1291	NM_001282878	LAX1	((((((((((((.......(((((&)))))......))))))).))))).	1517	1542	1	-20.1	1	0.00609976	0.588	0.305921	-0.221861	-7.05204	17	25	7	3UTR		0	0
hsa-miR-1291	NM_001282881	RIMS2	.(((((((.(((.(((((((((((&))))))))))))))))).)))).	6590	6613	1	-34.1	1	0.00222988	0.544	0.0981739	-0.308085	-6.13885	21	23	17	3UTR		0	0
hsa-miR-1291	NM_001282882	RIMS2	.(((((((.(((.(((((((((((&))))))))))))))))).)))).	3911	3934	1	-34.1	1	0.00222988	0.544	0	0	-6.13885	21	23	17	3UTR		0	0
hsa-miR-1291	NM_001282886	EIF4E3	.(((((...(((((((((((((..&))))))))..)))))...))))).	870	894	1	-24	1	0.00389936	0.5	-0.269416	-0.0147669	-8.70704	18	24	8	3UTR		0	0
hsa-miR-1291	NM_001282904	OPRK1	..(((.(((((((...(((((((.&)))))))...))))))).))).	2444	2466	1	-25.9	1	0.000319464	0.574	0.464366	0.037568	-8.6833	17	22	7	3UTR		0	0
hsa-miR-1291	NM_001282962	HJURP	.((((..((((..((((((((...&))))))))..)).))..)))).	2604	2626	1	-27.1	1	1.98876e-06	0.412	-0.22056	-0.213102	-11.8739	16	22	8	3UTR		0	0
hsa-miR-1291	NM_001282963	HJURP	.((((..((((..((((((((...&))))))))..)).))..)))).	2511	2533	1	-27.1	1	1.98876e-06	0.412	-0.660888	-0.489695	-11.8739	16	22	8	3UTR		0	0
hsa-miR-1291	NM_001282964	SLA	(((((((..(((.(((((((....&))))).)).)))))))))).	1429	1449	1	-24.2	1	1.09208e-05	0.441	-0.500922	-0.659662	-8.59673	17	20	10	3UTR		0	0
hsa-miR-1291	NM_001282965	SLA	(((((((..(((.(((((((....&))))).)).)))))))))).	1460	1480	1	-24.2	1	1.09208e-05	0.441	-0.454622	-0.426067	-8.59673	17	20	10	3UTR		0	0
hsa-miR-1291	NM_001282968	C14orf93	((((((((((((((((.(((((..&))))).))..............))))))))))..)))).	2588	2627	1	-25	1	0.00427712	0.588	0.137146	0.989405	-3.93757	21	39	10	3UTR		0	0
hsa-miR-1291	NM_001283	AP1S1	.((((((.((((.((.((((....&)))))).)))))))))).	982	1000	1	-22.6	1	5.74885e-06	0.412	0.554444	0.760928	-7.62914	16	18	10	3UTR		0	0
hsa-miR-1291	NM_001283020	NAPB	.((((((((((.((((........&)))))))))))))).	1749	1764	1	-21.8	1	1.45107e-05	0.603	-0.497472	-0.00150401	-7.14013	14	15	14	3UTR		0	0
hsa-miR-1291	NM_001283026	NAPB	.((((((((((.((((........&)))))))))))))).	1819	1834	1	-21.8	1	1.45107e-05	0.603	-0.241725	-0.16226	-7.14013	14	15	14	3UTR		0	0
hsa-miR-1291	NM_001283034	CIBAR1	(((((((....((((.(((((...&)))))....))))....))))))).	2223	2248	1	-24.1	1	0.0182275	0.574	0.291214	0.15501	-11.6079	16	25	7	3UTR		0	0
hsa-miR-1291	NM_001283034	CIBAR1	...((((..((((((.(((((...&.)))))))).............)))..)))).	3150	3192	1	-20.6	1	0.000376999	0.515	-0.050649	0.0530117	-10.1176	15	32	8	3UTR		0	0
hsa-miR-1291	NM_001284230	MAP3K9	..(((((.((((((((.(((((((&)))))))...))).)))))))))).	6377	6402	1	-27.5	1	2.45787e-05	0.441	-0.653404	0.219636	-7.27064	20	25	10	3UTR		0	1
hsa-miR-1291	NM_001284231	MAP3K9	..(((((.((((((((.(((((((&)))))))...))).)))))))))).	5608	5633	1	-27.5	1	2.45787e-05	0.441	-0.448	-0.185455	-7.27064	20	25	10	3UTR		0	1
hsa-miR-1291	NM_001284268	EFCAB11	.((((((.(((((((((.......&))))).)))...).)))))).	1228	1249	1	-20.7	1	0.0162243	0.588	0.790532	0.64342	-6.10696	15	21	6	3UTR		0	0
hsa-miR-1291	NM_001284349	IQCH	....((((.(((.(((((((....&)))))))))))))).	1248	1263	1	-19.3	1	0.00421239	0.588	7.21118	5.14123	-11.8921	14	15	14	3UTR		0	0
hsa-miR-1291	NM_001284353	ELAPOR1	.((((.(((.((((((((((((((&)))))))).....))))))))).)))).	3212	3240	1	-26.4	1	0.0828775	0.603	1.48054	1.20875	-6.93679	21	28	9	3UTR		0	0
hsa-miR-1291	NM_001284357	LRRC49	.((((((.((((((..(((((((.&)))))))..).....))).)).)))))).	4911	4940	1	-25.8	1	0.000746831	0.485	0	0	-7.07546	19	29	7	3UTR		0	0
hsa-miR-1291	NM_001284514	IKZF3	(.(((((.(((.....(((((...&)))))...))).))))).).	5381	5401	1	-23.5	1	0.00178254	0.441	0.0336347	0.17271	-13.8762	14	20	5	3UTR		0	0
hsa-miR-1291	NM_001284516	IKZF3	(.(((((.(((.....(((((...&)))))...))).))))).).	4701	4721	1	-23.5	1	0.00178254	0.441	0.12873	-0.238573	-13.8762	14	20	5	3UTR		0	0
hsa-miR-1291	NM_001285526	OPRM1	(.((((((((((((((.((((((.&)))))).)))..........)))))........)))))).).	14998	15040	1	-23.3	1	0.000699858	0.574	-0.138284	-0.0907319	-5.10125	21	42	6	3UTR		0	0
hsa-miR-1291	NM_001286050	FAM168A	.(((((((.(((.((((.(((((.&))))).))))))).)))).))).	2697	2720	1	-28.9	1	0.000263141	0.324	0.352787	-0.0146602	-6.13885	19	23	7	3UTR		0	0
hsa-miR-1291	NM_001286067	C11orf54	(((((((.(((...(((((.(((.&))).)))))....)))))))))).	3449	3473	1	-25.5	1	0.000553617	0.559	0.120721	0.203242	-11.744	18	24	10	3UTR		0	0
hsa-miR-1291	NM_001286068	C11orf54	(((((((.(((...(((((.(((.&))).)))))....)))))))))).	3312	3336	1	-25.5	1	0.000553617	0.559	0.120721	0.203242	-11.744	18	24	10	3UTR		0	0
hsa-miR-1291	NM_001286069	C11orf54	(((((((.(((...(((((.(((.&))).)))))....)))))))))).	3317	3341	1	-25.5	1	0.000553617	0.559	0.120721	0.203242	-11.744	18	24	10	3UTR		0	0
hsa-miR-1291	NM_001286070	C11orf54	(((((((.(((...(((((.(((.&))).)))))....)))))))))).	3165	3189	1	-25.5	1	0.000553617	0.559	0	0	-11.744	18	24	10	3UTR		0	0
hsa-miR-1291	NM_001286071	C11orf54	(((((((.(((...(((((.(((.&))).)))))....)))))))))).	3140	3164	1	-25.5	1	0.000553617	0.559	0	0	-11.744	18	24	10	3UTR		0	0
hsa-miR-1291	NM_001286152	MPZL3	.(.((((.((((((((((......&.)))))))))).)))).).	1854	1882	1	-25.2	1	3.44668e-05	0.603	0.253315	0.0575582	-7.6645	15	19	10	3UTR		0	0
hsa-miR-1291	NM_001286195	C12orf43	((((((.((((...(((.(((...&))).).))...)))))))))).	925	947	1	-20.9	1	0.000146243	0.485	-0.0952042	-0.175768	-10.974	16	22	10	3UTR		0	0
hsa-miR-1291	NM_001286367	NOP9	((((((((((((..(((((((((.&))))...)))))..)))..))))))))).	3030	3059	1	-27.7	1	3.59222e-05	0.441	0.146031	-0.139703	-6.08354	21	29	9	3UTR		0	0
hsa-miR-1291	NM_001286401	TMEM217	.(((((((((...(((((((((((&.)))))).)))))))))))))).	1840	1881	1	-30.7	1	0.000440588	0.544	3.14708	2.03667	-11.254	20	23	14	3UTR		0	0
hsa-miR-1291	NM_001286414	TUBGCP4	.(((((((.(((((((((((((((&)))))))))))................))))...................))))))).	5073	5131	1	-24.6	1	3.53063e-05	0.529	3.73206	3.18574	-4.84971	22	58	11	3UTR		0	0
hsa-miR-1291	NM_001286429	THSD4	.((((((((....(((((((((((&)))).))))).))..)))))))).	4088	4112	1	-27	1	4.88209e-05	0.5	-1.08741	-0.473075	-12.4965	19	24	8	3UTR		0	0
hsa-miR-1291	NM_001286441	EXD1	.(((((((....(((((((((...&)))))))))...................))))).)).	3017	3054	1	-22.7	1	0.00022384	0.603	0.0712024	0.233915	-12.2638	16	37	9	3UTR		0	0
hsa-miR-1291	NM_001286479	ARHGAP11A	(((((.((.(((((..((((((.(&).))))))..)).))).)).).)))).	3540	3567	1	-22.6	1	0.000184921	0.471	-0.00877155	0.211449	-7.86342	19	27	6	3UTR		0	0
hsa-miR-1291	NM_001286526	BCL7C	((((((((.(((....((((((..&.))))))....))))))))))).	1907	1937	1	-26.1	1	0.00436448	0.456	3.68188	2.97892	-8.10843	17	23	11	3UTR		0	0
hsa-miR-1291	NM_001286565	KIAA0513	.((((((((((((((((((((((.&))))))).))))))))))))..............))).	5785	5823	1	-26.9	1	7.77735e-05	0.559	-0.147953	-0.0716007	-3.79332	22	38	12	3UTR		0	0
hsa-miR-1291	NM_001286566	KIAA0513	.((((((((((((((((((((((.&))))))).))))))))))))..............))).	5360	5398	1	-26.9	1	7.77735e-05	0.559	-0.0883608	-0.373965	-3.79332	22	38	12	3UTR		0	0
hsa-miR-1291	NM_001286568	ZRANB3	.((((((((((((.....(((((.&.)))))...))))))))).))).	4868	4914	1	-22.4	1	0.00410585	0.544	2.04838	0.101864	-5.61866	17	23	9	3UTR		0	0
hsa-miR-1291	NM_001286589	AIG1	.((((..((.((.((((((((...&))))))))))...))..)))).	2099	2121	1	-23.7	1	0.00888225	0.426	-0.172306	0.0346765	-9.76961	16	22	10	3UTR		0	0
hsa-miR-1291	NM_001286650	ADH1B	(((((((((.(((...((..((((&))))..))..))).))))))))).	3155	3179	1	-21.7	1	0.0231736	0.647	2.60987	2.05192	-7.00542	18	24	9	3UTR		0	0
hsa-miR-1291	NM_001286650	ADH1B	((((((((.(((.(((...(((((&)).)))...)))..))))))))))).	3299	3325	1	-21	1	0.000226298	0.529	2.04904	3.53837	-6.28309	19	26	11	3UTR		0	0
hsa-miR-1291	NM_001286773	OCIAD2	..((((((((((((((...((((.&.)))))))))).......)))))))).	712	748	1	-22.6	1	0.000533559	0.515	0	0	-4.957	18	27	10	3UTR		0	0
hsa-miR-1291	NM_001286810	DCAF10	..(((((((((((.((........&)).))))))))))).	3291	3306	1	-20.4	1	0.00288693	0.588	2.20505	0.660898	-5.81384	13	15	11	3UTR		0	0
hsa-miR-1291	NM_001286820	FRG2	.((((.((.(((((..((((((((&)).))))))..)).))).)).).))).	1514	1541	1	-21.8	1	0.000153851	0.5	-0.0345318	-0.130195	-7.71917	19	27	6	3UTR		0	0
hsa-miR-1291	NM_001286947	TXNDC8	(((.((((...(((.(((((....&))))).)))...))))))).	653	673	1	-18.8	1	0.00361853	0.632	-0.120135	-0.00666303	-12.8287	15	20	7	3UTR		0	0
hsa-miR-1291	NM_001286971	CENPP	((((((((((((............&)))))))))))).	1321	1334	1	-24.8	1	0.00158072	0.471	-0.777954	-0.424802	-7.05204	12	13	12	3UTR		0	0
hsa-miR-1291	NM_001287000	ST6GALNAC6	.(((((((((((.(((((((((((&))).)))))....)))..)))....)))))))).	1167	1201	1	-27.8	1	0.000103251	0.441	-0.0537342	0.116944	-5.08246	22	34	8	3UTR		0	1
hsa-miR-1291	NM_001287002	ST6GALNAC6	.(((((((((((.(((((((((((&))).)))))....)))..)))....)))))))).	1184	1218	1	-27.8	1	0.000103251	0.441	0.218467	0.0728031	-5.08246	22	34	8	3UTR		0	1
hsa-miR-1291	NM_001287003	ST6GALNAC6	.(((((((((((.(((((((((((&))).)))))....)))..)))....)))))))).	830	864	1	-27.8	1	0.000103251	0.441	-0.248058	-0.0705878	-5.08246	22	34	8	3UTR		0	1
hsa-miR-1291	NM_001287010	GLIPR2	((((((((.((((((.((((((((&)))))))))))..)))))))...........)))).	1667	1703	1	-27.7	1	1.02276e-05	0.397	0.989935	0.795923	-5.22701	22	36	11	3UTR		0	0
hsa-miR-1291	NM_001287012	GLIPR2	((((((((.((((((.((((((((&)))))))))))..)))))))...........)))).	1563	1599	1	-27.7	1	1.02276e-05	0.397	0.989935	0.795923	-5.22701	22	36	11	3UTR		0	0
hsa-miR-1291	NM_001287049	SAXO1	.((((((.((...((((((((...&.)))))))))).)))))).	1770	1803	1	-23.5	1	0.000419842	0.662	2.47935	0.78815	-13.5677	16	19	10	3UTR		0	0
hsa-miR-1291	NM_001287050	SAXO1	.((((((.((...((((((((...&)))))))))).)))))).	1790	1808	1	-23.7	1	0.000419842	0.662	0.0322065	-0.0577427	-13.5677	16	18	10	3UTR		0	0
hsa-miR-1291	NM_001287055	ZKSCAN1	(((((((..((...((((((....&))))))..))..)))).))).	7609	7630	1	-21.3	1	9.01999e-05	0.515	0.71889	0.35702	-12.8004	15	21	6	3UTR		0	0
hsa-miR-1291	NM_001287135	CDK14	.((((((((((.(((((..((...&)).))))).)...))))))))).	2640	2663	1	-22	1	4.17583e-06	0.574	0.350036	0.832287	-7.14013	17	23	9	3UTR		0	0
hsa-miR-1291	NM_001287135	CDK14	(((((((((.(((((..(((((..&))))).....))))).))))))))).	3783	3809	1	-22.8	1	0.0298353	0.647	0.75252	0.402762	-5.41313	19	26	9	3UTR		0	0
hsa-miR-1291	NM_001287136	CDK14	.((((((((((.(((((..((...&)).))))).)...))))))))).	2352	2375	1	-22	1	4.17583e-06	0.574	0.350036	0.832287	-7.14013	17	23	9	3UTR		0	0
hsa-miR-1291	NM_001287136	CDK14	(((((((((.(((((..(((((..&))))).....))))).))))))))).	3495	3521	1	-22.8	1	0.0298353	0.647	0.75252	0.402762	-5.41313	19	26	9	3UTR		0	0
hsa-miR-1291	NM_001287137	CDK14	.((((((((((.(((((..((...&)).))))).)...))))))))).	2257	2280	1	-22	1	4.17583e-06	0.574	0.350036	0.832287	-7.14013	17	23	9	3UTR		0	0
hsa-miR-1291	NM_001287137	CDK14	(((((((((.(((((..(((((..&))))).....))))).))))))))).	3400	3426	1	-22.8	1	0.0298353	0.647	0.75252	0.402762	-5.41313	19	26	9	3UTR		0	0
hsa-miR-1291	NM_001287244	RALYL	..((((.((((((((.........&.)))))))).)))).	1388	1427	1	-20.5	1	0.000501545	0.632	0.557754	0.420462	-6.73374	12	15	8	3UTR		0	0
hsa-miR-1291	NM_001287336	KIAA1191	.(((((((((((((.(........&.).))))).)))))))).	2205	2252	1	-23.8	1	2.1436e-05	0.5	0.964574	2.94215	-4.52877	14	18	8	3UTR		0	0
hsa-miR-1291	NM_001287421	ZSCAN26	(((((((((((((((((((((...&.))))))...)))))).........))))))))).	1968	2017	1	-28.6	1	0.000364711	0.574	-0.0424265	0.165147	-3.93757	21	35	9	3UTR		0	0
hsa-miR-1291	NM_001287422	ZSCAN26	(((((((((((((((((((((...&.))))))...)))))).........))))))))).	1529	1578	1	-28.6	1	0.000364711	0.574	0.284826	0.0347154	-3.93757	21	35	9	3UTR		0	0
hsa-miR-1291	NM_001287436	COBL	(((((((((..(((((((((((((&))))))))..)))))............))))))))).	4539	4576	1	-27.7	1	0.0017154	0.559	1.57763	3.35273	-8.00486	22	37	9	3UTR		0	0
hsa-miR-1291	NM_001287491	TET3	((((((((.((((((.((((....&.)))).)))))))))))))).	9372	9422	1	-28.1	1	0.000100737	0.471	0.10749	0.349371	-5.22701	18	21	14	3UTR		0	0
hsa-miR-1291	NM_001287584	NUP35	.....(((((((((((((((((((&)))))))))..)))))))))).	1211	1233	1	-28.4	1	0.000180399	0.574	0.559315	3.08709	-13.6656	19	22	10	3UTR		0	0
hsa-miR-1291	NM_001287740	STK32A	.(((((((...(((((.((((.((&)).)))))))))....))))))).	2986	3010	1	-22.6	1	0.000657949	0.529	-0.62859	-0.230751	-8.917	18	24	9	3UTR		0	0
hsa-miR-1291	NM_001288643	ZNF286A	((((((((..((((((((.((...&)).))..)))))))))))))).	3158	3180	1	-24.3	1	0.021078	0.471	0.0144495	-0.0677941	-6.23647	18	22	14	3UTR		0	0
hsa-miR-1291	NM_001288734	ATE1	(.((((((((((..(((...(((.&)))...))).)))))))))).).	2521	2544	1	-22.4	1	6.24757e-06	0.529	-0.260591	-0.210902	-7.24722	17	23	10	3UTR		0	0
hsa-miR-1291	NM_001288735	ATE1	(.((((((((((..(((...(((.&)))...))).)))))))))).).	2498	2521	1	-22.4	1	6.24757e-06	0.529	0.387992	-0.0234751	-7.24722	17	23	10	3UTR		0	0
hsa-miR-1291	NM_001288736	ATE1	(.((((((((((..(((...(((.&)))...))).)))))))))).).	2554	2577	1	-22.4	1	6.24757e-06	0.529	-0.128086	0.0192407	-7.24722	17	23	10	3UTR		0	0
hsa-miR-1291	NM_001288788	TOM1L2	.((((((.((((.((((((((((.&))))))).)))...)))).)))))).	1804	1830	1	-29.4	1	9.18406e-06	0.471	-0.166558	-0.359924	-7.39609	20	26	7	3UTR		0	0
hsa-miR-1291	NM_001288789	TOM1L2	.((((((.....(((((((.(((.&))).))))))))))))).	4465	4483	1	-26.7	1	4.8386e-05	0.309	3.36631	3.05981	-14.5774	16	18	13	3UTR		0	0
hsa-miR-1291	NM_001288798	MCRIP1	.((.((((((...((((((.(((.&))).)))))))))))))).	1070	1089	1	-24.7	1	1.48289e-05	0.313	-0.0979725	0.110694	-14.2861	17	19	14	3UTR		0	0
hsa-miR-1291	NM_001288799	MCRIP1	.((.((((((...((((((.(((.&))).)))))))))))))).	1133	1152	1	-24.7	1	1.48289e-05	0.313	-0.0979725	0.131859	-14.2861	17	19	14	3UTR		0	0
hsa-miR-1291	NM_001288802	NFATC4	(((((((((..(.(((((((....&))))))))))))))))).	3020	3038	1	-28.1	1	2.03e-06	0.441	0.857221	0.288367	-9.29399	17	18	17	3UTR		0	1
hsa-miR-1291	NM_001288811	ARL17A	.(((((((.(((...((((((...&)))))).))).)))).))).	1211	1231	1	-23.9	1	4.59508e-05	0.397	0.634433	0.127347	-7.73113	16	20	6	3UTR		0	0
hsa-miR-1291	NM_001288813	ARL17A	.(((((((.(((...((((((...&)))))).))).)))).))).	1135	1155	1	-23.9	1	4.59508e-05	0.397	0.124197	-0.122102	-7.73113	16	20	6	3UTR		0	0
hsa-miR-1291	NM_001288962	TRIP10	((((((.....((((..(((((((&.))))))))))).)))))).	1914	1940	1	-23.7	1	2.20122e-05	0.353	0.949394	1.59074	-13.1516	17	20	11	3UTR		0	0
hsa-miR-1291	NM_001288996	LIN54	.(((((((((.(((((((.(.(((&))).).)).)))))..))))))))).	5704	5730	1	-21.7	1	0.00650062	0.662	1.7709	1.89838	-6.6181	20	26	9	3UTR		0	0
hsa-miR-1291	NM_001288997	LIN54	.(((((((((.(((((((......&)).)))))..))))))))).	5062	5082	1	-21.7	1	0.00650062	0.662	5.84014	2.95453	-6.6181	16	20	9	3UTR		0	0
hsa-miR-1291	NM_001289	CLIC2	((((((...(((..(((((.....&)))))..))))))))).	2283	2300	1	-18	1	0.00085514	0.485	4.51633	4.77738	-10.9973	14	17	9	3UTR		0	0
hsa-miR-1291	NM_001289029	EEF2KMT	(((((..(((((((((.(((((((&)))))))))..))))).))..))))).	1492	1519	1	-24.1	1	0.000678385	0.412	0.341902	1.80673	-7.38222	21	27	9	3UTR		0	0
hsa-miR-1291	NM_001289030	GALK2	((((((((.((..(..((..(((.&)))...))..)..)).)))))))).	3479	3504	1	-22.3	1	0.000466888	0.544	-0.217575	0.167292	-10.5984	16	25	8	3UTR		0	0
hsa-miR-1291	NM_001289034	KLC4	((((((((((((((((((((((((&)))))))).))))))))))).............))))).	2437	2476	1	-36.8	1	2.4112e-07	0.353	0.567849	0.16002	-3.93757	24	39	11	3UTR		0	0
hsa-miR-1291	NM_001289035	KLC4	((((((((((((((((((((((((&)))))))).))))))))))).............))))).	1991	2030	1	-36.8	1	2.4112e-07	0.353	0.567849	0.16002	-3.93757	24	39	11	3UTR		0	0
hsa-miR-1291	NM_001289092	HARS1	.(((((((.(.((.(((((.....&)))))...)).)))))))).	1636	1656	1	-23.1	1	2.26462e-05	0.353	0.576228	0.405245	-8.53133	15	20	8	3UTR		0	0
hsa-miR-1291	NM_001289093	HARS1	.(((((((.(.((.(((((.....&)))))...)).)))))))).	1516	1536	1	-23.1	1	2.26462e-05	0.353	0.576228	0.405245	-8.53133	15	20	8	3UTR		0	0
hsa-miR-1291	NM_001289095	PXK	.(((((((((((..(((((.((((&))))))))).)))...)))))))).	2412	2437	1	-21.5	1	0.00160603	0.574	0.396414	0.141923	-5.9393	20	25	9	3UTR		0	0
hsa-miR-1291	NM_001289098	PXK	.(((((((((((..(((((.((((&))))))))).)))...)))))))).	2465	2490	1	-21.5	1	0.00160603	0.574	0.396414	0.141923	-5.9393	20	25	9	3UTR		0	0
hsa-miR-1291	NM_001289100	PXK	.(((((((((((..(((((.((((&))))))))).)))...)))))))).	2366	2391	1	-21.5	1	0.00160603	0.574	0.396414	0.141923	-5.9393	20	25	9	3UTR		0	0
hsa-miR-1291	NM_001289110	RNASE9	.((.((((..((.((((((.((..&))))))))))..)))).)).	956	976	1	-19.5	1	0.00136634	0.485	0.143189	0.0687775	-10.4134	16	20	10	3UTR		0	0
hsa-miR-1291	NM_001289128	IFNAR2	.((((((..(((((((...((...&))...))))))))))))).	1678	1697	1	-23.6	1	1.36736e-06	0.441	-0.193334	-0.147943	-7.16335	15	19	13	3UTR		0	0
hsa-miR-1291	NM_001289133	BTBD7	.(((((((((((.(..((.((...&)).))..).))))))))))).	3075	3096	1	-26.6	1	1.76063e-05	0.441	0.725955	0.703706	-6.05095	16	21	11	3UTR		0	0
hsa-miR-1291	NM_001289155	MPI	((((((((...((((.((.(((((&))))).)))))))))))))).	5148	5169	1	-26.4	1	2.8965e-07	0.515	-0.0112127	0.369682	-9.29429	19	21	14	3UTR		0	0
hsa-miR-1291	NM_001289156	MPI	((((((((...((((.((.(((((&))))).)))))))))))))).	5229	5250	1	-26.4	1	2.8965e-07	0.515	-0.0112127	0.369682	-9.29429	19	21	14	3UTR		0	0
hsa-miR-1291	NM_001289157	MPI	((((((((...((((.((.(((((&))))).)))))))))))))).	5174	5195	1	-26.4	1	2.8965e-07	0.515	-0.0112127	0.369682	-9.29429	19	21	14	3UTR		0	0
hsa-miR-1291	NM_001289861	PER3	((((((((((((((((...(((((&.)))))....))))))))))).))))).	6126	6185	1	-28.3	1	0.0214353	0.676	0.622908	0.157565	-3.93757	21	28	11	3UTR		0	0
hsa-miR-1291	NM_001289862	PER3	((((((((((((((((...(((((&.)))))....))))))))))).))))).	6045	6104	1	-28.3	1	0.0214353	0.676	0.622908	0.157565	-3.93757	21	28	11	3UTR		0	0
hsa-miR-1291	NM_001289905	IL17RA	.((((((((((((((((.(((((.&))))).))))))).))))))))).	5973	5997	1	-26.8	1	0.00822666	0.603	-0.254735	-0.0232409	-3.79332	21	24	9	3UTR		0	0
hsa-miR-1291	NM_001290040	ROBO2	..(((((((((((((((((.....&.))))))))))))))))).	5576	5601	1	-27.9	1	0.00927676	0.618	1.67219	2.79574	-4.957	17	19	17	3UTR		0	0
hsa-miR-1291	NM_001290046	CECR2	.(((((((((((....(((((...&.)))))...)))))).))))).	4473	4500	1	-28.9	1	0.00014727	0.456	0.28778	-0.0450455	-6.90779	16	22	6	3UTR		0	0
hsa-miR-1291	NM_001290046	CECR2	.((((((((....(((((((((..&)))))))))...)))).)))).	6481	6503	1	-27.5	1	0.00726286	0.544	-0.0284287	-0.375569	-12.4965	17	22	9	3UTR		0	0
hsa-miR-1291	NM_001290047	CECR2	.(((((((((((....(((((...&.)))))...)))))).))))).	4851	4878	1	-28.9	1	0.00014727	0.456	0.28778	-0.0450455	-6.90779	16	22	6	3UTR		0	0
hsa-miR-1291	NM_001290047	CECR2	.((((((((....(((((((((..&)))))))))...)))).)))).	6859	6881	1	-27.5	1	0.00726286	0.544	-0.0284287	-0.375569	-12.4965	17	22	9	3UTR		0	0
hsa-miR-1291	NM_001290230	CDK2	.((((((((..((((..(((((..&)))))...)))).)))))))).	1742	1764	1	-23.6	1	0.000203245	0.588	1.27652	1.01277	-8.09365	17	22	8	3UTR		0	0
hsa-miR-1291	NM_001290252	DPP6	.(((((.((((..(((.((((((.&)))))))))..))))))))).	3268	3289	1	-22.6	1	0.000438392	0.471	-0.00233333	0.436625	-9.97295	18	21	9	3UTR		0	0
hsa-miR-1291	NM_001290268	RIPOR3	..((((((((.((((((((((...&)))))))))).)).))).))).	3431	3453	1	-28.9	1	0.000895243	0.471	3.77756	3.20361	-7.78178	18	22	10	3UTR		0	0
hsa-miR-1291	NM_001290296	SORBS1	((((((((.((((..((..(((((&))))))).)))).)))))))).	3225	3247	1	-23.4	1	0.00403009	0.559	0.101379	1.57252	-6.58625	19	22	8	3UTR		0	0
hsa-miR-1291	NM_001290307	CTNNA1	..(((((((((((((...(((...&)))...))))))))...))))).	3227	3250	1	-20.8	1	0.000336044	0.544	-0.18207	-0.0972974	-5.19005	16	23	8	3UTR		0	0
hsa-miR-1291	NM_001290312	CTNNA1	..(((((((((((((...(((...&)))...))))))))...))))).	2515	2538	1	-20.8	1	0.000336044	0.544	-0.0274177	-0.147703	-5.19005	16	23	8	3UTR		0	0
hsa-miR-1291	NM_001290342	CERS3	.((((((..((((((((((((((.&))))))))))))................))..)))..))).	2548	2589	1	-23.5	1	0.0016631	0.471	2.78171	2.08106	-7.16335	20	41	12	3UTR		0	0
hsa-miR-1291	NM_001291085	ADGRA1	..((((((((((.((((((.(((.&))))))))).)))))..))))).	1825	1848	1	-29	1	1.11245e-07	0.412	-0.607947	-1.26146	-6.24613	19	23	9	3UTR		0	0
hsa-miR-1291	NM_001291412	SON	((((((...(((....(((((((.&))))))).))).....)))))).	1969	1992	1	-24.8	1	0.000153455	0.574	3.92648	2.15725	-11.9658	16	23	7	3UTR		0	0
hsa-miR-1291	NM_001291470	CCL4L2	.((((((...(((((((((((...&))))).))))))...)))))).	312	334	1	-26.2	1	0.000537728	0.397	0.17912	-0.115911	-8.40586	17	22	6	3UTR		0	0
hsa-miR-1291	NM_001291488	ZNF285	((((...(((((((((((......&.)))))))))))..)))).	2199	2223	1	-24.2	1	0.0134557	0.618	0.314201	0.298745	-11.5013	15	19	11	3UTR		0	0
hsa-miR-1291	NM_001291489	ZNF285	((((...(((((((((((......&.)))))))))))..)))).	2269	2293	1	-24.2	1	0.0134557	0.618	0.0946464	0.46134	-11.5013	15	19	11	3UTR		0	0
hsa-miR-1291	NM_001291694	NR2C2	.(((((((((((..(.((((((((&.)))))....)))).....))))))))))).	3279	3324	1	-26.7	1	0.000539787	0.397	-0.278896	-0.0623697	-6.17234	20	31	11	3UTR		0	0
hsa-miR-1291	NM_001291858	IGF1R	.(((((((.(((..(((((((.((&))...)).))))))))))))))).	7033	7057	1	-26.3	1	2.0675e-08	0.279	-0.557557	0.474086	-6.99569	19	24	15	3UTR		0	1
hsa-miR-1291	NM_001291858	IGF1R	(((..(.(((((..(((((((((.&)))))))))..))))).)..))).	7494	7518	1	-24.8	1	0.00333117	0.544	1.1289	1.24745	-14.7783	18	24	9	3UTR		0	1
hsa-miR-1291	NM_001291970	POLH	.((((((.(.((..((((((.(((&)))))))))....)).).)))))).	2636	2661	1	-24	1	0.000117687	0.603	-0.0385834	0.110913	-9.49544	18	25	9	3UTR		0	0
hsa-miR-1291	NM_001292008	SSR1	(((((((((..(...((((((...&))))))..)..))))))))).	3072	3093	1	-27.1	1	4.14232e-05	0.529	0.147307	-0.0522182	-10.8863	16	21	9	3UTR		0	0
hsa-miR-1291	NM_001292039	MAPK4	.(((((((..(.(((.((((((((&)))))))).))).).)))).))).	3208	3232	1	-23.2	1	0.0021274	0.603	2.21328	1.31936	-9.67207	19	24	8	3UTR		0	0
hsa-miR-1291	NM_001292040	MAPK4	.(((((((..(.(((.((((((((&)))))))).))).).)))).))).	4248	4272	1	-23.2	1	0.0021274	0.603	2.21328	1.31936	-9.67207	19	24	8	3UTR		0	0
hsa-miR-1291	NM_001293069	CHN2	((((((((((((.((..(((((((&)))))))..))...)))))...))))))).	3012	3042	1	-25.6	1	1.78987e-05	0.456	0.891988	0.281242	-5.45975	21	30	7	3UTR		0	0
hsa-miR-1291	NM_001293285	SPATS2	(.(((((..(((.(((.((((...&))))))))))..)).))).).	2456	2477	1	-20.5	1	0.000105215	0.471	0.498991	0.322395	-9.76041	16	21	10	3UTR		0	0
hsa-miR-1291	NM_001293286	SPATS2	(.(((((..(((.(((.((((...&))))))))))..)).))).).	2309	2330	1	-20.5	1	0.000105215	0.471	0.498991	0.322395	-9.76041	16	21	10	3UTR		0	0
hsa-miR-1291	NM_001293298	CEMIP	.((((((.((((((((...((((.&))))...)))))))).)))))).	4775	4798	1	-27.4	1	1.79314e-05	0.441	0.860748	0.229537	-6.10696	18	23	8	3UTR		0	0
hsa-miR-1291	NM_001293304	CEMIP	.((((((.((((((((...((((.&))))...)))))))).)))))).	4715	4738	1	-27.4	1	1.79314e-05	0.441	0.860748	0.229537	-6.10696	18	23	8	3UTR		0	0
hsa-miR-1291	NM_001293642	CA12	((((((((.((.....(((((...&))))))).)))))))).	3338	3355	1	-25.5	1	1.45699e-08	0.426	4.05811	3.09699	-11.4552	15	17	8	3UTR		0	0
hsa-miR-1291	NM_001293695	SEPTIN9	((((((((.(.(((((.((((...&)))))))))))))))).)).	3071	3091	1	-23.6	1	0.000208039	0.412	-1.29387	-0.630734	-7.81874	18	20	16	3UTR		0	0
hsa-miR-1291	NM_001293696	SEPTIN9	((((((((.(.(((((.((((...&)))))))))))))))).)).	2434	2454	1	-23.6	1	0.000208039	0.412	-1.29387	-0.630734	-7.81874	18	20	16	3UTR		0	0
hsa-miR-1291	NM_001293697	SEPTIN9	((((((((.(.(((((.((((...&)))))))))))))))).)).	2415	2435	1	-23.6	1	0.000208039	0.412	-1.29387	-0.630734	-7.81874	18	20	16	3UTR		0	0
hsa-miR-1291	NM_001293698	SEPTIN9	((((((((.(.(((((.((((...&)))))))))))))))).)).	2707	2727	1	-23.6	1	0.000208039	0.412	-1.29387	-0.630734	-7.81874	18	20	16	3UTR		0	0
hsa-miR-1291	NM_001293815	ALDH1A3	.((((((...((((((((((....&)).))))))))....)).)))).	2371	2394	1	-21.8	1	0.000327866	0.529	0.054588	0.076711	-8.40586	16	23	8	3UTR		0	0
hsa-miR-1291	NM_001297438	VAMP1	.(((((((((((....(((((...&.))))).......)))))))............)))).	619	663	1	-23.4	1	0.0317289	0.382	0.438015	1.59195	-6.90779	16	37	7	3UTR		0	0
hsa-miR-1291	NM_001297550	APELA	.((.(((((.(.(((((((((...&))))))))).)..))))))).	1212	1233	1	-25	1	0.000181296	0.559	0.207189	0.219035	-11.4147	17	21	9	3UTR		0	0
hsa-miR-1291	NM_001297555	MAP2K7	((((((((......(((((((.((&)).))))))).)))))))).	3053	3073	1	-25.9	1	8.1635e-09	0.309	-0.11233	0.0644024	-14.554	17	20	8	3UTR		0	0
hsa-miR-1291	NM_001297556	MAP2K7	((((((((......(((((((.((&)).))))))).)))))))).	3026	3046	1	-25.9	1	8.1635e-09	0.309	-0.11233	0.0644024	-14.554	17	20	8	3UTR		0	0
hsa-miR-1291	NM_001297623	ZNF461	(((.(((((((((((.((((((..&.)))))))))).))))))).))).	3592	3647	1	-29.4	1	0.00771563	0.5	1.24079	0.986441	-7.20265	20	24	10	3UTR		0	0
hsa-miR-1291	NM_001297624	ZNF480	.(((((..(((((((.((.((...&)).)))))))))...))))).	2303	2324	1	-22.7	1	2.25667e-05	0.603	0.249701	-0.316708	-7.8837	16	21	9	3UTR		0	0
hsa-miR-1291	NM_001297625	ZNF480	.(((((..(((((((.((.((...&)).)))))))))...))))).	2305	2326	1	-22.7	1	2.25667e-05	0.603	0.249701	-0.316708	-7.8837	16	21	9	3UTR		0	0
hsa-miR-1291	NM_001297656	KIF2C	.(((((((.((..((((((.(((.&.))).))).))).))))))))).	2441	2474	1	-25.9	1	7.48482e-05	0.456	0.0374409	0.323838	-9.48565	18	23	9	3UTR		0	0
hsa-miR-1291	NM_001297674	RPRD2	...((((((((.....(((((...&)))))..)))))))).	5189	5205	1	-21.2	1	0.000384477	0.529	0.497516	0.456289	-12.9758	13	16	8	3UTR		0	0
hsa-miR-1291	NM_001297697	CCDC125	..((((((((.((((.(((.....&)))))))..)))))))).	2663	2681	1	-23.6	1	0.000113266	0.515	1.57254	2.42924	-8.01482	15	18	8	3UTR		0	0
hsa-miR-1291	NM_001297703	USHBP1	((((((.(((((.((....(((((&))))).)).))))).)))))).	2764	2786	1	-23.4	1	7.7693e-05	0.544	1.43204	0.366423	-7.00344	18	22	6	3UTR		0	0
hsa-miR-1291	NM_001297737	NSL1	.(((((.((.(.(((((((((...&))))))))).)..))..))))).	7837	7860	1	-26.1	1	0.000214305	0.426	-0.0835543	0.375599	-9.92632	17	23	9	3UTR		0	0
hsa-miR-1291	NM_001300722	LARGE2	.((((((..(((.(((((......&))))).)))..)))))).	2296	2314	1	-22.9	1	6.64505e-05	0.485	-0.0943791	0.2584	-8.45248	14	18	6	3UTR		0	0
hsa-miR-1291	NM_001300737	NKAIN2	((((((((..(((((((((.((((&)))))))...))).))).))).))))).	2022	2050	1	-21.4	1	0.0299866	0.632	2.31587	2.98889	-6.23647	21	28	7	3UTR		0	0
hsa-miR-1291	NM_001300742	BORCS5	..(((((((((((((..(((((((&)))))))...)).)))))........)))))).	2199	2232	1	-23	1	1.20846e-06	0.441	0	0	-5.19005	20	33	7	3UTR		0	0
hsa-miR-1291	NM_001300746	TMEM53	((.((((((((((..(((......&)))...)))))))))).)).	1589	1609	1	-23.6	1	0.00471728	0.412	1.92	2.94787	-7.0874	15	20	10	3UTR		0	0
hsa-miR-1291	NM_001300747	TMEM53	((.((((((((((..(((......&)))...)))))))))).)).	1621	1641	1	-23.6	1	0.00471728	0.412	2.22326	2.32094	-7.0874	15	20	10	3UTR		0	0
hsa-miR-1291	NM_001300754	SLC9B2	.(((((((.(((((...((((...&.))))....)))))))))))).	4454	4518	1	-25.9	1	2.69744e-06	0.441	3.44304	2.58385	-5.81821	16	22	12	3UTR		0	0
hsa-miR-1291	NM_001300763	CYB561A3	.((((((((((((((.(((.((((&))))))).)))).................)).)))))))).	1115	1156	1	-26.1	1	0.000547232	0.382	3.30014	2.80223	-4.02637	21	41	8	3UTR		0	1
hsa-miR-1291	NM_001300789	PEX5	((((((((.((((.((((.(((((&)))))...)))).)))).......)))))))).	2850	2883	1	-30.8	1	0.000296684	0.412	0.109725	-0.14663	-5.8508	21	33	8	3UTR		0	1
hsa-miR-1291	NM_001300798	SEPTIN8	.((((((((.(((((.(((((((.&)))))))))))))))))))).	3455	3476	1	-26.2	1	0.000358054	0.647	5.46523	5.10443	-5.26888	20	21	20	3UTR		0	0
hsa-miR-1291	NM_001300837	SP7	((.((((((.(((((((((.(((.&))).)))..)))))))))))).)).	2107	2132	1	-27.1	1	2.85094e-05	0.441	0.74296	1.14817	-6.73762	20	25	12	3UTR		0	0
hsa-miR-1291	NM_001300851	RC3H1	.((((((((((...(((((.((((&.))))))))).))))).))))).	7847	7877	1	-26.4	1	0.000302961	0.544	3.25227	3.35584	-9.2861	19	23	9	3UTR		0	0
hsa-miR-1291	NM_001300865	RANBP3	((((((((((((.......((((.&))))........))))).))))))).	2491	2517	1	-25.5	1	0.000107102	0.294	0.84928	1.02636	-7.05204	16	26	7	3UTR		0	0
hsa-miR-1291	NM_001300869	SLC29A2	(((((((...(((..(((..(((.&)))..)))..))).))))))).	2069	2091	1	-24.4	1	0.000109363	0.441	4.1842	3.12708	-10.1424	16	22	7	3UTR		0	0
hsa-miR-1291	NM_001300884	CHIC1	.((.((((((((((((........&)))))))))))).)).	5512	5528	1	-21.4	1	0.163803	0.647	0	0	-6.82535	14	16	12	3UTR		0	0
hsa-miR-1291	NM_001300912	ZNF333	..((((..((((((((.((((((.&)))))))))))))))))).	1454	1473	1	-25.7	1	3.85414e-05	0.515	0.304781	0.00160285	-8.81432	18	19	18	3UTR		0	0
hsa-miR-1291	NM_001300936	SRSF10	((((..(((((((((((.(((((.&))))).)))))))))))..)))).	3389	3413	1	-25.3	1	0.00361973	0.574	3.23756	3.12103	-9.95757	20	24	11	3UTR		0	0
hsa-miR-1291	NM_001300953	ACER3	.((((.((((((((.((((((((.&))))))).).))))).))).)))).	916	941	1	-26.5	1	0.000925209	0.515	0.67202	0.621786	-6.42973	20	25	7	3UTR		0	0
hsa-miR-1291	NM_001300954	ACER3	.((((.((((((((.((((((((.&))))))).).))))).))).)))).	1098	1123	1	-26.5	1	0.000925209	0.515	0.67202	0.621786	-6.42973	20	25	7	3UTR		0	0
hsa-miR-1291	NM_001300963	CDK19	.((((((((((((.((((((((((&)))))))))).))))...............)))..........)).))).	3415	3465	1	-24.1	1	5.83636e-06	0.426	2.31981	1.76831	-4.65016	22	50	10	3UTR		0	0
hsa-miR-1291	NM_001301017	NKAPD1	.(((((((.((((((((((.(((.&))))))))................)))))..))))))).	1001	1040	1	-22.8	1	0.000117471	0.471	0.584959	0.649202	-4.84971	20	39	8	3UTR		0	0
hsa-miR-1291	NM_001301019	NKAPD1	.(((((((.((((((((((.(((.&))))))))................)))))..))))))).	1045	1084	1	-22.8	1	0.000117471	0.471	0.584959	0.649202	-4.84971	20	39	8	3UTR		0	0
hsa-miR-1291	NM_001301043	CADM1	(((((.(((((((((.((((....&)))))))))))))....))))).	8647	8670	1	-22.9	1	0.16856	0.591	3.19503	2.35609	-6.07158	18	23	13	3UTR		0	0
hsa-miR-1291	NM_001301044	CADM1	(((((.(((((((((.((((....&)))))))))))))....))))).	8593	8616	1	-22.9	1	0.16856	0.591	3.19503	2.35609	-6.07158	18	23	13	3UTR		0	0
hsa-miR-1291	NM_001301045	CADM1	(((((.(((((((((.((((....&)))))))))))))....))))).	8563	8586	1	-22.9	1	0.16856	0.591	3.19503	2.35609	-6.07158	18	23	13	3UTR		0	0
hsa-miR-1291	NM_001301085	QKI	(((((((.((((((((((((.(((&.)))))))))))).))..).))))))).	4737	4785	1	-26.4	1	1.25693e-06	0.441	1.8109	1.42357	-6.25121	22	28	12	3UTR		0	0
hsa-miR-1291	NM_001301089	SNX19	(((((((.(((((((...(((...&))).))))))).))))))).	3236	3256	1	-28.1	1	0.000676112	0.544	-0.11815	-0.145498	-6.48426	17	20	7	3UTR		0	1
hsa-miR-1291	NM_001301110	ADAMTSL3	((((((((((((((((.((((...&)))))))))...))))))))))).	6332	6356	1	-23.3	1	0.120156	0.529	0.0931504	0.12168	-3.93757	20	24	11	3UTR		0	0
hsa-miR-1291	NM_001301200	LINGO1	((((((((...((((.(((((...&.)))))))))...)))))).)).	2912	2941	1	-26.9	1	0.000358164	0.294	0.395625	1.05386	-9.29429	17	23	9	3UTR		0	0
hsa-miR-1291	NM_001301210	MYEF2	(.((((((.((((((.(((.....&))).)))))))))))).).	4061	4080	1	-22.7	1	0.00106515	0.5	0.0214649	0.000546434	-6.39069	16	19	12	3UTR		0	0
hsa-miR-1291	NM_001301212	TRPM7	..(((((.((...(((((((((((&))))).)))))))).).)))).	10206	10228	1	-22.2	1	0.000744679	0.588	2.4021	2.43597	-14.7313	18	22	8	3UTR		0	0
hsa-miR-1291	NM_001301237	CTPS1	((((((.((((((.(((((((...&.))))))).................)))))).)).)))).	1939	1984	1	-24.2	1	0.000777534	0.529	0.326449	0.0139632	-6.3381	19	40	7	3UTR		0	0
hsa-miR-1291	NM_001301268	INAFM2	.((((..((.(((((..(((((((&)))))))..))))).))..)))).	1736	1760	1	-27	1	0.0010378	0.515	0.326321	0.927579	-8.71353	18	24	7	3UTR		0	0
hsa-miR-1291	NM_001301839	SAP30BP	((.((((.(((((((..(((((..&))))).))))))).)).)).)).	1931	1954	1	-21.1	1	0.00132324	0.471	0.318061	1.12396	-8.0418	18	23	7	3UTR		0	0
hsa-miR-1291	NM_001301855	SAP30BP	((.((((.(((((((..(((((..&))))).))))))).)).)).)).	2081	2104	1	-21.1	1	0.00132324	0.471	0.318061	1.12396	-8.0418	18	23	7	3UTR		0	0
hsa-miR-1291	NM_001301873	CCL28	(((((.((.(((((..((((((.(&).))))))..)).))).)).).)))).	756	783	1	-22.6	1	0.000203619	0.471	0.006413	-0.0456819	-7.86342	19	27	6	3UTR		0	0
hsa-miR-1291	NM_001302746	FASLG	.((((((.((((((...(((((..&.)))))..)))))).)))))).	943	974	1	-25.6	1	0.000921018	0.588	2.04386	2.17147	-7.07546	17	22	6	3UTR		0	0
hsa-miR-1291	NM_001303	COX10	(.(((((((((((.((((((((((&))))))))))............))))))))))).).	2622	2658	1	-32.1	1	0.00204301	0.515	-0.370335	0.0524912	-5.95809	22	36	11	3UTR		0	0
hsa-miR-1291	NM_001303059	TMED4	.(((((.((((...(((((((((.&)))))))))))))..))))).	952	973	1	-25.5	1	0.000498825	0.515	0.0925096	-0.0452511	-10.8298	18	21	13	3UTR		0	0
hsa-miR-1291	NM_001303110	COL4A1	..((((((...((((.((((((((&))))))))...)))).............)))))).	2035	2070	1	-23.7	1	0.00762106	0.574	2.22435	3.30423	-10.3137	18	35	8	3UTR		0	0
hsa-miR-1291	NM_001303252	MAPK12	.((.((((((((.((.(((.((((&)))).)))..)).))).))))))).	1533	1558	1	-25.3	1	7.49178e-05	0.353	0.139111	0.293625	-8.34753	19	25	7	3UTR		0	0
hsa-miR-1291	NM_001303420	COLGALT2	((..((((((((.(((((((.(((&.))))))))))....))))))))..)).	2169	2221	1	-22	1	0.00342098	0.559	0.944189	0.912974	-9.81627	20	28	10	3UTR		0	0
hsa-miR-1291	NM_001303426	ZNF639	..((((((.(((((..((((((.(&).))))))..)).))).)).).))).	3431	3457	1	-21.4	1	5.30613e-05	0.5	-0.13057	-0.0863032	-6.98189	18	26	6	3UTR		0	0
hsa-miR-1291	NM_001303426	ZNF639	.((((((((.(((((((((((...&))))))))))).)))...............)).))).	5139	5176	1	-21.2	1	0.00199418	0.588	0.0104402	0.0699799	-5.03583	19	37	11	3UTR		0	0
hsa-miR-1291	NM_001303470	MAP11	((((((((.((.((..((......&))..)).))..)))))))).	1898	1918	1	-23.7	1	5.71853e-06	0.426	3.2599	1.60252	-9.30927	14	20	8	3UTR		0	0
hsa-miR-1291	NM_001304273	ARMC7	(((((((((..(((..(((((((.&)))))))..)))..))))))))).	719	743	1	-30.7	1	0.000133135	0.412	0.110447	-0.203889	-8.97335	19	24	9	3UTR		0	0
hsa-miR-1291	NM_001304275	RAPGEF1	((((((((.(..(((((((((((.&))))..)))))))))))))))).	5227	5250	1	-27.3	1	2.32382e-08	0.397	3.82181	2.57127	-11.1655	20	23	16	3UTR		0	0
hsa-miR-1291	NM_001304335	ZNF773	.((((((((((......((((...&))))....)).)))))))).	5796	5816	1	-23	1	1.53469e-06	0.515	0.119598	0.0474407	-10.2546	14	20	8	3UTR		0	0
hsa-miR-1291	NM_001304337	ZNF773	.((((((((((......((((...&))))....)).)))))))).	5751	5771	1	-23	1	1.53469e-06	0.515	0.119598	0.0474407	-10.2546	14	20	8	3UTR		0	0
hsa-miR-1291	NM_001304346	ERMN	...(((((((((((((((......&)))))))........)))))))).	2604	2628	1	-20.7	1	0.0333071	0.647	0.604067	1.91766	-6.51454	15	24	8	3UTR		0	0
hsa-miR-1291	NM_001304364	ZBTB26	((((((((((((....((.((((.&)))).))....)))))))))....))).	2183	2211	1	-21.7	1	0.00145451	0.544	0	0	-7.05204	18	28	9	3UTR		0	0
hsa-miR-1291	NM_001304370	CENPM	.(((((((((((..(((((((((.&.)))))).....)))))))))))))).	761	814	1	-28.9	1	8.81617e-07	0.412	1.12352	1.47375	-5.9393	20	27	14	3UTR		0	0
hsa-miR-1291	NM_001304372	CENPM	.(((((((((((..(((((((((.&.)))))).....)))))))))))))).	846	899	1	-28.9	1	8.81617e-07	0.412	1.12352	1.47375	-5.9393	20	27	14	3UTR		0	0
hsa-miR-1291	NM_001304373	CENPM	.(((((((((((..(((((((((.&.)))))).....)))))))))))))).	669	722	1	-28.9	1	8.81617e-07	0.412	1.12352	1.47375	-5.9393	20	27	14	3UTR		0	0
hsa-miR-1291	NM_001304376	ADGRG5	.((((((((.((..(((((((.((&)).)))))))..)).)))).)))).	2708	2733	1	-26	1	0.000551078	0.412	0.160108	0.0386357	-7.1818	19	25	7	3UTR		0	0
hsa-miR-1291	NM_001304481	FGD4	.((((((.(((.((((((((....&.)))))))).))))))))).	5383	5418	1	-20.9	1	0.00222411	0.662	0.928746	0.588776	-9.45376	17	20	9	3UTR		0	0
hsa-miR-1291	NM_001304494	ZNF23	(((((((.(.(((((((.......&.))))))).).))))))).	2177	2221	1	-25.3	1	6.79695e-05	0.647	0.320594	0.201652	-7.49372	15	19	7	3UTR		0	1
hsa-miR-1291	NM_001304533	NKAIN3	..(((((((..((((((.(((((.&)))))...))))))))))))).	15468	15490	1	-25.9	1	3.21725e-05	0.618	0.134409	0.0254206	-9.02428	18	22	13	3UTR		0	0
hsa-miR-1291	NM_001304782	CRTAM	(((((((((((.(((.........&.))).))..))))))))).	908	946	1	-19.5	1	8.51522e-06	0.485	0.234391	0.278385	-7.51743	14	19	9	3UTR		0	0
hsa-miR-1291	NM_001304990	SPRY3	.((((((((((.((...((((((.&)))))))).)))))))))).	3992	4012	1	-29.2	1	1.94632e-05	0.529	2.00328	1.47239	-8.10863	18	20	10	3UTR		0	1
hsa-miR-1291	NM_001305002	ITFG1	(((((((.((((((....(((((.&)))))..))))))))))))).	2309	2330	1	-20.6	1	0.000364189	0.647	3.56035	2.17711	-7.21971	18	21	13	3UTR		0	0
hsa-miR-1291	NM_001305019	ZNF747	(((((((..(((((..((((((.(&).))))))..)).)))))).)))).	2127	2152	1	-24.3	1	0.000118099	0.441	1.53658	-0.134094	-8.2761	19	25	6	3UTR		0	0
hsa-miR-1291	NM_001305020	ZNF747	(((((((..(((((..((((((.(&).))))))..)).)))))).)))).	2267	2292	1	-24.3	1	0.000118099	0.441	0.841315	0.428248	-8.2761	19	25	6	3UTR		0	0
hsa-miR-1291	NM_001305051	TMEM59	..(((((((((..((((.......&))))..))))))))).	3325	3341	1	-22.5	1	9.38822e-05	0.603	-0.146691	0.188441	-9.59293	13	16	9	3UTR		0	0
hsa-miR-1291	NM_001305052	TMEM59	..(((((((((..((((.......&))))..))))))))).	3219	3235	1	-22.5	1	9.38822e-05	0.603	0.835963	-0.0685096	-9.59293	13	16	9	3UTR		0	0
hsa-miR-1291	NM_001305225	GVQW3	.(((((((((((......(((((.&.)))))...))))))))))).	1513	1579	1	-30	1	0.000375393	0.485	0.878077	0.433437	-6.90779	16	21	11	3UTR		0	0
hsa-miR-1291	NM_001305225	GVQW3	.(((((.(((((.(((((((((((&)).)))))))....))...)))).).))))).	1602	1634	1	-25.5	1	0.000300675	0.456	0.0515663	0.289175	-6.62614	21	32	7	3UTR		0	0
hsa-miR-1291	NM_001305544	RNF43	..((((.((.(((((.(((((((.&))))))).))))))).)))).	3795	3816	1	-26.8	1	0.00060771	0.544	1.52008	2.24388	-7.97624	18	21	7	3UTR		0	1
hsa-miR-1291	NM_001305630	CYREN	..((((((((((((((...((((.&.)))).)))))))...))))))).	592	630	1	-24.2	1	0.0079849	0.529	0.0875295	0.309539	-4.957	18	24	7	3UTR		0	0
hsa-miR-1291	NM_001306093	ZADH2	.(((((.((.((.((((((((...&))))))))))...))..))))).	6942	6965	1	-25.2	1	0.00496608	0.426	2.23318	3.60189	-7.86865	17	23	10	3UTR		0	0
hsa-miR-1291	NM_001306151	DAPP1	.(((((((((((((((...(((((&))))))))).)))))...))))...)).	2262	2290	1	-20.6	1	4.64631e-05	0.676	0.0503924	0.157375	-3.79332	20	28	9	3UTR		0	0
hsa-miR-1291	NM_001306195	ARPP19	((((......(.((((((((((((&)))))))))))).)..)))).	4837	4858	1	-24.5	1	0.00161488	0.676	1.56334	2.76282	-19.4606	17	21	12	3UTR		0	0
hsa-miR-1291	NM_001308019	EXPH5	(((((.((.(((((..((((((((&))))))))..)).))).)).).)))).	8774	8801	1	-24	1	3.62089e-05	0.529	0.410955	1.50247	-7.86342	20	27	8	3UTR		0	0
hsa-miR-1291	NM_001308019	EXPH5	.((((((((((.(((((((((...&))))))))........).)).)))))......))).	7218	7254	1	-23.7	1	0.000244652	0.412	0.276153	0.0881195	-7.14013	19	36	8	3UTR		0	0
hsa-miR-1291	NM_001308020	PIK3C3	....(((((((....(((((((((&)))))))))........))))))).	5178	5203	1	-22.9	1	0.000135908	0.485	-0.00113915	0.235904	-15.7748	16	25	9	3UTR		0	0
hsa-miR-1291	NM_001308031	FER	.((((.(((((((((.(((((((.&)))))))))))).)))).)))).	9773	9796	1	-24.4	1	0.0156011	0.588	0.191746	0.00690787	-5.92733	20	23	12	3UTR		0	0
hsa-miR-1291	NM_001308101	DCUN1D1	((((((((..(((((..(((((((&)))))))..))))).....)))))))).	5268	5296	1	-30.4	1	1.73583e-05	0.456	1.46701	1.80253	-6.46952	20	28	8	3UTR		0	0
hsa-miR-1291	NM_001308147	PLEKHG3	.(((((((.(((((.(((((((((&))))).))....)).)))))))))))).	5617	5645	1	-28.9	1	0.000417611	0.368	-0.334481	-0.184709	-5.58516	21	28	12	3UTR		0	0
hsa-miR-1291	NM_001308177	NEURL1B	.((((((((((....(((((((((&))))))))))))).)))))).	2902	2923	1	-28.7	1	1.4206e-06	0.397	-0.496941	-0.175835	-10.0215	19	21	13	3UTR		0	0
hsa-miR-1291	NM_001308178	NEURL1B	.((((((((((....(((((((((&))))))))))))).)))))).	2728	2749	1	-28.7	1	1.4206e-06	0.397	-0.496941	-0.175835	-10.0215	19	21	13	3UTR		0	0
hsa-miR-1291	NM_001308189	CPEB4	((((((((((((((((((((((((&))))))........................))......))))))))))..........).))))).	7784	7850	1	-22.2	1	0.000643645	0.632	-0.140326	-0.0950132	-3.93757	24	66	10	3UTR		0	0
hsa-miR-1291	NM_001308191	CPEB4	((((((((((((((((((((((((&))))))........................))......))))))))))..........).))))).	7760	7826	1	-22.2	1	0.000643645	0.632	-0.140326	-0.0950132	-3.93757	24	66	10	3UTR		0	0
hsa-miR-1291	NM_001308203	SGIP1	.(((((((.(((((((..(((...&)))..))))..)))))))))).	5276	5298	1	-22.7	1	0.000915981	0.632	0.755944	0.0802737	-4.84971	17	22	10	3UTR		0	1
hsa-miR-1291	NM_001308204	SSR3	..(((((((....((((((((...&))))))))......))))))).	4104	4126	1	-23.3	1	0.00632023	0.515	-0.321608	1.02801	-13.6602	15	22	8	3UTR		0	0
hsa-miR-1291	NM_001308205	SSR3	..(((((((....((((((((...&))))))))......))))))).	4128	4150	1	-23.3	1	0.00632023	0.515	-0.805094	0.0450327	-13.6602	15	22	8	3UTR		0	0
hsa-miR-1291	NM_001308264	ST7L	.((((.((((((((((((.(((((&.)))))........))).))))))))).).))).	3987	4031	1	-27.1	1	0.0102515	0.559	-0.168276	0.61628	-5.69428	21	34	9	3UTR		0	1
hsa-miR-1291	NM_001308274	RNF32	..((((((((((............&.)))))))))).	1788	1811	1	-20.9	1	0.000372015	0.544	0.102888	0.0954969	-8.07147	10	12	10	3UTR		0	0
hsa-miR-1291	NM_001308281	UNC45B	((((((..((((.....(((((((&)))))))))))..)))))).	4028	4048	1	-24.2	1	2.73912e-05	0.515	0.045946	-0.117437	-10.9094	17	20	11	3UTR		0	1
hsa-miR-1291	NM_001308295	NMT2	.((((..((.((((((((((((..&.))))))))))))..))..)))).	3884	3930	1	-27.6	1	0.0119316	0.471	3.42836	4.16725	-8.48048	18	24	12	3UTR		0	0
hsa-miR-1291	NM_001308325	AKTIP	.(((((((.(((.(((((.(((..&.)))...))).))..)))))))))).	1125	1171	1	-20.2	1	0.000325367	0.603	2.3307	1.49667	-6.13885	18	26	10	3UTR		0	0
hsa-miR-1291	NM_001308334	RPGRIP1L	.(((((.((((((((.((((((((&)))))....)))...))))))))))))).	6135	6164	1	-23.4	1	0.00043685	0.662	0.307005	2.19978	-5.57006	21	29	13	3UTR		0	0
hsa-miR-1291	NM_001308339	DENND5B	.(((((((((.((((((..((...&))...))))))))))))))).	4995	5016	1	-23.3	1	7.37079e-05	0.471	1.84951	0.944898	-6.6181	17	21	15	3UTR		0	0
hsa-miR-1291	NM_001308380	DMKN	(((((...((((((((((((((((&)))))....)))).)))))))))))).	807	834	1	-27.5	1	2.29242e-06	0.471	0.300307	0.156474	-9.69585	21	27	12	3UTR		0	0
hsa-miR-1291	NM_001308383	DMKN	(((((...((((((((((((((((&)))))....)))).)))))))))))).	714	741	1	-27.5	1	2.29242e-06	0.471	0.300307	0.627398	-9.69585	21	27	12	3UTR		0	0
hsa-miR-1291	NM_001308491	ERVH48-1	.(((((((((((...(((((((..&))))))).....))))))............))))).	2156	2192	1	-24.9	1	0.000406086	0.5	-0.129341	-0.043117	-6.67474	18	36	7	3UTR		0	0
hsa-miR-1291	NM_001309193	EPHB2	.(((((((..((.((.(((((((.&)))))))))))))))))).	3646	3665	1	-24.9	1	7.55438e-06	0.471	0.455063	0.697817	-7.6144	18	19	18	3UTR		0	1
hsa-miR-1291	NM_001311255	BLOC1S6	(((((((((((..(((((......&))))).)))).))))))).	2329	2348	1	-20.7	1	0.00407245	0.676	-0.15018	0.376842	-8.57351	16	19	7	3UTR		0	0
hsa-miR-1291	NM_001311312	GGCX	.(((((...(((..((((((....&))))))))).......))))).	683	705	1	-21	1	1.95615e-05	0.529	0.492195	0.303126	-10.853	14	22	9	3UTR		0	0
hsa-miR-1291	NM_001312646	UBE2K	..(((((((((....(((.(((((&)))))..)))....))))))))).	4803	4827	1	-23.6	1	0.0216149	0.544	2.08496	2.73728	-11.1852	17	24	9	3UTR		0	0
hsa-miR-1291	NM_001312646	UBE2K	((((((((((...(.(((((....&))).)).))))))))))).	963	982	1	-21.6	1	0.000621267	0.647	2.28822	2.7764	-12.1337	16	19	11	3UTR		0	0
hsa-miR-1291	NM_001312673	PCYT1A	.((((((..((((((((((.((..&)).)))))))))))))))).	4616	4636	1	-24.4	1	4.44353e-05	0.5	5.29986	5.43467	-7.16335	18	20	16	3UTR		0	0
hsa-miR-1291	NM_001313943	RHOA	.((((((((.((..(((((.(((.&.))).)).)))..))..)))))))).	1245	1283	1	-24.5	1	0.000883434	0.515	0.118772	1.20784	-7.1818	18	26	8	3UTR		0	0
hsa-miR-1291	NM_001313947	RHOA	.((((((((.((..(((((.(((.&.))).)).)))..))..)))))))).	985	1023	1	-24.5	1	0.000883434	0.515	4.96976	3.71372	-7.1818	18	26	8	3UTR		0	0
hsa-miR-1291	NM_001313965	TFRC	(((((((.((((((((..((((..&))))...))))))))))))))).	2216	2239	1	-24.1	1	0.00141403	0.603	1.02166	0.176082	-6.25121	19	23	15	3UTR		0	0
hsa-miR-1291	NM_001314000	BECN1	.((((((.(((.((((.(((((..&))))).....)))).))))))))).	1053	1078	1	-19.7	1	0.0014279	0.574	5.08216	4.97026	-9.45376	18	25	9	3UTR		0	0
hsa-miR-1291	NM_001316311	RPL35A	(((((.((((((.(..((((((.(&).))))))..).)))))).).)))).	918	944	1	-24.8	1	0.030285	0.5	0.0823898	-0.0855197	-8.09616	19	26	6	3UTR		0	0
hsa-miR-1291	NM_001316314	PLCB3	((((((((.(((....(((((.((&))...))))).....))))))))))).	4022	4049	1	-25.6	1	3.99273e-07	0.265	0.786318	0.607729	-8.10843	18	27	11	3UTR		0	0
hsa-miR-1291	NM_001316361	BCAS1	((((((.(((((..((((.((...&)).))))...))))))))))).	1901	1923	1	-21.9	1	0.000119703	0.529	0.456178	0.889418	-7.62723	17	22	11	3UTR		0	0
hsa-miR-1291	NM_001316897	SPACA9	...(((((..((((((((((((((&)))))))))......)))))))))).	2145	2171	1	-24	1	3.26614e-06	0.603	1.6792	1.04464	-8.81344	19	26	10	3UTR		0	0
hsa-miR-1291	NM_001316898	SPACA9	...(((((..((((((((((((((&)))))))))......)))))))))).	2121	2147	1	-24	1	3.26614e-06	0.603	1.6792	1.04464	-8.81344	19	26	10	3UTR		0	0
hsa-miR-1291	NM_001316951	GPALPP1	.((((((((.(((((((.(((((.&))))).)))))..)).)))))))).	1654	1679	1	-23.6	1	0.00496583	0.75	0.144338	0.226301	-5.03583	20	25	8	3UTR		0	0
hsa-miR-1291	NM_001316973	LZIC	..((..((((((((((((..(((.&))).))))))))))))..)).	840	861	1	-21.9	1	0.00506203	0.632	0.258264	0.17978	-10.977	17	21	12	3UTR		0	0
hsa-miR-1291	NM_001317003	LYPD6B	.(((((((.(((((..(((.....&)))...)))))))))))).	904	923	1	-22.9	1	9.11511e-06	0.441	0.288346	0.534429	-5.81821	15	19	12	3UTR		0	0
hsa-miR-1291	NM_001317004	LYPD6B	.(((((((.(((((..(((.....&)))...)))))))))))).	937	956	1	-22.9	1	9.11511e-06	0.441	0.00853427	-0.00770458	-5.81821	15	19	12	3UTR		0	0
hsa-miR-1291	NM_001317006	LYPD6B	.(((((((.(((((..(((.....&)))...)))))))))))).	833	852	1	-22.9	1	9.11511e-06	0.441	0.288346	0.534429	-5.81821	15	19	12	3UTR		0	0
hsa-miR-1291	NM_001317075	BLCAP	.(((((((((.((......((((.&))))......))...))))))))).	867	892	1	-20.8	1	0.000700919	0.485	0.504136	0.943287	-8.44344	15	25	9	3UTR		0	0
hsa-miR-1291	NM_001317182	METAP2	...((((((.((((.((((.((.(&).)).)))).)))))))))).	2183	2204	1	-22.9	1	0.000410972	0.603	-0.443504	0.274844	-8.4925	17	21	10	3UTR		0	0
hsa-miR-1291	NM_001317183	METAP2	...((((((.((((.((((.((.(&).)).)))).)))))))))).	2183	2204	1	-22.9	1	0.000410972	0.603	-0.443504	0.274844	-8.4925	17	21	10	3UTR		0	0
hsa-miR-1291	NM_001317816	SLC10A7	..(((.(((((((...((.(((..&))).))..))))))).))).	1446	1466	1	-19.3	1	0.00193442	0.618	0.312983	0.53632	-8.6833	15	20	7	3UTR		0	0
hsa-miR-1291	NM_001317817	SLC10A7	...((((..((...(((((((...&)))))))))..)))).	884	900	1	-20.4	1	0.00209974	0.618	2.3567	1.63382	-15.3773	13	16	9	3UTR		0	0
hsa-miR-1291	NM_001317858	CHCHD7	.((((((((((.....((.((...&)).))......)))))))))).	1261	1283	1	-22	1	0.000211981	0.485	0.494342	0.0605204	-10.2546	14	22	10	3UTR		0	0
hsa-miR-1291	NM_001317859	CHCHD7	.((((((((((.....((.((...&)).))......)))))))))).	1089	1111	1	-22	1	0.000211981	0.485	0.494342	0.0605204	-10.2546	14	22	10	3UTR		0	0
hsa-miR-1291	NM_001317860	OIP5	.(((((((..((((((.(((((((&)))))))))))))....)))).))).	633	659	1	-24.3	1	0.0242575	0.603	1.51394	1.50159	-6.09222	20	26	13	3UTR		0	0
hsa-miR-1291	NM_001317911	PPM1L	.((((((((((.(((((((.(((.&))).))))))).))))....................))).))).	952	996	1	-26.1	1	0.000523722	0.559	0.499239	0.769322	-7.14013	20	44	7	3UTR		0	0
hsa-miR-1291	NM_001317912	PPM1L	.((((((((((.(((((((.(((.&))).))))))).))))....................))).))).	1052	1096	1	-26.1	1	0.000523722	0.559	0.499239	0.769322	-7.14013	20	44	7	3UTR		0	0
hsa-miR-1291	NM_001317916	ZNF658	.((((((((.((((((((......&.)))))))))))))))).	3806	3856	1	-26.3	1	0.0787948	0.662	-0.562528	-0.472839	-5.03583	16	18	16	3UTR		0	0
hsa-miR-1291	NM_001317991	FAM214B	(((((((((((.....((......&.)).....))))))))))).	2805	2833	1	-26	1	2.95801e-06	0.368	1.11634	1.81471	-10.3988	13	20	11	3UTR		0	1
hsa-miR-1291	NM_001318042	ZNF618	((((((((.(((((..((......&))..))))).)))))))).	8694	8713	1	-25.7	1	1.01041e-06	0.456	2.0534	3.42023	-5.96246	15	19	8	3UTR		0	1
hsa-miR-1291	NM_001318067	MAPK10	..(((((((..((((.(((((((.&))))).))))))..))))))).	4609	4631	1	-23	1	3.14782e-05	0.559	2.55359	2.39252	-9.25733	18	22	7	3UTR		0	0
hsa-miR-1291	NM_001318217	TMEM208	(((((((((((..(((((..((..&))..)))))))))..))))))).	804	827	1	-26.4	1	0.000163989	0.5	0.714355	0.517318	-8.57351	18	23	9	3UTR		0	0
hsa-miR-1291	NM_001318234	SNPH	((((((((.(((((((((((....&)))).))))))).)))))))).	2608	2630	1	-31.4	1	1.03129e-06	0.353	0.0723802	0.147148	-4.99396	19	22	8	3UTR		0	1
hsa-miR-1291	NM_030648	SETD7	.((((((..(.((((.((.(((((&))))).)).))))).)))))).	5561	5583	1	-24.4	1	3.03773e-09	0.5	6.04589	1.84066	-10.2212	18	22	6	3UTR		0	0
hsa-miR-1291	NM_030661	HOXA3	.....(((((((...(((((((..&)))))))...))))))).	2041	2059	1	-24.2	1	0.000331103	0.647	2.83372	3.60089	-16.547	14	18	7	3UTR		0	0
hsa-miR-1291	NM_030755	TMX1	.(((((((.(((.((.(((((...&)))))))...))).))))))).	2733	2755	1	-22	1	6.21363e-05	0.662	0.292906	-0.00757961	-6.37189	17	22	7	3UTR		0	0
hsa-miR-1291	NM_030761	WNT4	((((((((.(((....(((((.((&.))..))))).....))).)))))))).	2408	2454	1	-27.4	1	1.21852e-05	0.397	0.432976	0.374349	-8.10843	18	28	8	3UTR		0	0
hsa-miR-1291	NM_030799	YIPF5	((((((..(((((.(.(((.((..&.))))).).))))))))))).	917	943	1	-21.3	1	0.000123721	0.618	0.501126	0.118167	-8.88478	17	21	11	3UTR		0	0
hsa-miR-1291	NM_030803	ATG16L1	.(((((((.((((.((((.(((((&)))))))))..))))))).)))).	2194	2218	1	-25.5	1	0.00013179	0.485	0.441826	0.751618	-5.70655	20	24	9	3UTR		0	0
hsa-miR-1291	NM_030824	ZNF442	((((((((((((..(((.((((((&.))))))..))).)))))))))))).	4523	4576	1	-28.7	1	0.000342441	0.485	0.014246	-0.418119	-6.08354	21	26	12	3UTR		0	0
hsa-miR-1291	NM_030885	MAP4	.((((((((..(((.(((..((((&))))..)))..))).)))))))).	522	546	1	-26.9	1	9.58147e-05	0.529	1.35898	0.0608827	-8.59606	18	24	8	3UTR		0	0
hsa-miR-1291	NM_030915	LBH	...(((((.(((.(((((((((..&))))))))).)).).))))).	1101	1122	1	-22.2	1	0.00373777	0.544	0.543336	0.246861	-8.86006	17	21	9	3UTR		0	0
hsa-miR-1291	NM_030918	SNX27	(((((..((((((((.(((((...&))))).)))))))).......))))).	6958	6985	1	-27.8	1	0.0373144	0.588	1.28195	1.90711	-7.61527	18	27	8	3UTR		0	0
hsa-miR-1291	NM_030961	TRIM56	(((((((((.((..((((((((..&))))).))))).))))))))).	6005	6027	1	-24.9	1	0.000564364	0.529	0	0	-7.32605	19	22	9	3UTR		0	0
hsa-miR-1291	NM_030978	ARPC5L	..((.((((((.((.((((((.((&)).)))))).))))))))..)).	1967	1990	1	-22.7	1	1.77877e-05	0.382	1.00528	0.701613	-13.1583	18	23	8	3UTR		0	0
hsa-miR-1291	NM_031215	CABLES2	(((((((...((((((((((((((&))))))).)....))))))...))))))).	2696	2726	1	-27.4	1	3.0037e-05	0.471	4.64426	4.77192	-8.55011	21	30	7	3UTR		0	0
hsa-miR-1291	NM_031272	TEX14	..((((((((....(((.(((((.&)))))...)))...)))))))).	4536	4559	1	-25.1	1	2.52571e-05	0.529	2.70385	2.36566	-13.2745	16	23	8	3UTR		0	0
hsa-miR-1291	NM_031286	SH3BGRL3	.(((((((.((((.(((((((((.&)))))))))...)))).)))............)))).	654	691	1	-25	1	0.0012573	0.382	0.308252	0.941802	-5.70655	20	37	9	3UTR		0	0
hsa-miR-1291	NM_031292	PUS7L	(((((((((((.............&))))))))))).	12954	12966	1	-22.7	1	7.8964e-06	0.618	3.2285	2.83108	-10.3988	11	12	11	3UTR		0	0
hsa-miR-1291	NM_031369	HNRNPD	.(((((((((((((((........&))))))))))))))).	2239	2255	1	-22.9	1	5.58278e-05	0.706	0	0	-3.79332	15	16	15	3UTR		0	0
hsa-miR-1291	NM_031417	MARK4	.((((((.(((((...(((((...&.))).))....))))))))))).	4845	4882	1	-25.7	1	1.64015e-06	0.412	0.255827	-0.281527	-7.9323	16	23	11	3UTR		0	0
hsa-miR-1291	NM_031421	TTC25	(((((((..(((((.((((((...&)))))).))))))))).))).	2154	2175	1	-26.7	1	0.000301959	0.574	0.80499	-0.0542645	-8.04305	18	21	9	3UTR		0	0
hsa-miR-1291	NM_031448	C19orf12	(((.((((((...(((((((....&)))))))..)))))).))).	3088	3108	1	-25.9	1	0.00023188	0.368	0.070896	-0.213074	-14.4303	16	20	7	3UTR		0	1
hsa-miR-1291	NM_031449	ZMIZ2	.((((((((.....(.(((((((.&)))))))))))))))).	3943	3960	1	-25	1	8.76348e-07	0.294	0.415125	0.29285	-13.5864	16	17	16	3UTR		0	0
hsa-miR-1291	NM_031455	CCDC3	((((((((.(...(.(((.(((((&.)))))..))).)))))))))).	961	989	1	-25.6	1	1.11641e-05	0.397	0.4955	-0.175762	-13.1901	18	23	10	3UTR		0	1
hsa-miR-1291	NM_031469	SH3BGRL2	..(((((...((..(((((((.((&)))))))))..)).))))).	907	927	1	-20	1	0.00648221	0.588	0.237929	0.299976	-11.7155	16	20	9	3UTR		0	0
hsa-miR-1291	NM_031473	IFT81	.((((..((...(((((((((...&.)))))))))....))..)))).	1900	1936	1	-24.6	1	0.0177283	0.426	-0.189739	0.115883	-14.6521	15	23	9	3UTR		0	0
hsa-miR-1291	NM_031845	MAP2	.(((((((((.(((((..(((((.&)))))..)))))..).)))))))).	3416	3441	1	-22.3	1	0.00522842	0.676	0.963887	0.388946	-6.6181	19	25	8	3UTR		0	0
hsa-miR-1291	NM_031886	KCNA7	((((((((..((.(((((((((((&)))))).).)))))))))))))).	2508	2532	1	-24.9	1	0.000129078	0.529	-0.00734101	0.0683795	-7.5256	21	24	14	3UTR		0	0
hsa-miR-1291	NM_031899	GORASP1	.(((((((.(((..((((((.(((&)))))))))...................)))))))))).	1607	1646	1	-25	1	0.000172987	0.426	-0.715262	-0.284836	-6.99569	19	39	10	3UTR		0	0
hsa-miR-1291	NM_031912	SYT15	..((((((((((.(((.((((...&)))).))).........)))))))))).	3501	3529	1	-24.9	1	0.00214684	0.529	-0.391912	-0.155666	-6.24613	17	28	10	3UTR		0	0
hsa-miR-1291	NM_031944	MIXL1	.(((((((((((....((((((((&.)))..)))))...))))..)))).))).	1418	1460	1	-22.5	1	0.000339059	0.471	-0.156392	0.0313271	-6.90779	19	29	5	3UTR		0	0
hsa-miR-1291	NM_031947	SLC25A2	.(((((((((.(((((........&.)).))).))))))))).	1367	1392	1	-22.9	1	0.000568097	0.629	-0.624673	-0.272952	-6.6181	14	18	9	3UTR		0	1
hsa-miR-1291	NM_031957	KRTAP1-5	......(((((((((.(((((((.&)))))))...))))))))).	1104	1124	1	-21.5	0	0.000402303	0.647	0.617289	0.45319	-15.7996	16	20	9	3UTR		0	0
hsa-miR-1291	NM_031989	PCBP2	.(((((((.((.(((.((((....&))))..))).)).))))))).	2645	2666	1	-21.4	1	3.25121e-05	0.471	0.834771	1.42763	-8.42957	16	21	7	3UTR		0	0
hsa-miR-1291	NM_031992	EIF4H	.(((((((((((((((((((((((&))))).......))))))))))).))....))))).	860	896	1	-24.7	1	0.00139116	0.588	4.13766	2.13696	-3.79332	23	36	11	3UTR		0	0
hsa-miR-1291	NM_032012	TMEM245	.(((((((((((((((..((((((&)))))))))).)))))..)))))).	5929	5954	1	-23.3	1	6.07383e-05	0.574	5.78804	5.71746	-3.79332	21	25	10	3UTR		0	0
hsa-miR-1291	NM_032040	CCDC8	.(((((((.((..((((((((((.&))))))))))....))..))))))).	3098	3124	1	-32.4	1	1.31038e-07	0.368	1.03949	0.743721	-9.48565	19	26	10	3UTR		0	0
hsa-miR-1291	NM_032047	B3GNT5	.(((((((..(((.(((((((.((&)).)))))))..)))))))))).	2389	2412	1	-24	1	3.05158e-05	0.544	0.29872	0.510445	-6.94906	19	23	10	3UTR		0	0
hsa-miR-1291	NM_032092	PCDHGA11	..(((((..(((((..((((((((&))).))))).)))))..))))).	3031	3054	1	-26.2	1	2.65719e-05	0.456	1.10393	0.912993	-9.29552	18	23	5	3UTR		0	0
hsa-miR-1291	NM_032110	DMRTA2	(((((((....((((((((((.((&)).)))))))).))....))).)))).	2851	2878	1	-25.6	1	0.000551355	0.368	0.762776	0.816291	-11.3749	19	27	8	3UTR		0	0
hsa-miR-1291	NM_032128	SLC10A7	...((((..((...(((((((...&)))))))))..)))).	1021	1037	1	-20.4	1	0.00209974	0.618	-0.0599443	0.265242	-15.3773	13	16	9	3UTR		0	0
hsa-miR-1291	NM_032143	ZRANB3	.((((((((((((.....(((((.&.)))))...))))))))).))).	4906	4952	1	-22.4	1	0.00410585	0.544	0.0779272	0.584418	-5.61866	17	23	9	3UTR		0	0
hsa-miR-1291	NM_032167	SNX29	(((.(((..((((((.(((((.((&.)).)))))))))))..))).))).	3161	3203	1	-27.5	1	0.000131599	0.353	-0.666401	-0.32039	-10.5727	19	25	11	3UTR		0	0
hsa-miR-1291	NM_032180	FAM161A	..((((((((((.(((.(((((((&)))))))))).))..)))))))).	2030	2054	1	-23.4	1	0.00013613	0.485	2.39253	1.40113	-6.24613	20	24	10	3UTR		0	0
hsa-miR-1291	NM_032208	ANTXR1	(((((((((((((.((((.((...&)).).)).).)))))))))).))).	3866	3891	1	-24	1	0.00484392	0.471	0.282303	0.403997	-4.79441	19	25	10	3UTR		0	0
hsa-miR-1291	NM_032239	LARP1B	(.((((((((((((((........&)))))))))))))).).	1717	1734	1	-24	1	0.0057666	0.632	3.06015	2.05695	-5.10125	15	17	14	3UTR		0	0
hsa-miR-1291	NM_032279	ATP13A4	..((((((....((((((((.(((&))).))))))))....)))))).	5319	5342	1	-22.8	1	0.00418827	0.618	2.21621	2.15769	-13.4275	17	23	8	3UTR		0	0
hsa-miR-1291	NM_032285	MRI1	.((((((((((.((((........&))))..)))))))))).	1655	1672	1	-22	1	8.56217e-05	0.485	0.0498218	0.0265531	-7.14013	14	17	10	3UTR		0	0
hsa-miR-1291	NM_032288	FYTTD1	.((((((((.((.((((((((...&))))))))))...........)))))......))).	5462	5498	1	-22.2	1	6.53945e-05	0.426	0.11799	-0.200831	-6.32496	18	36	10	3UTR		0	0
hsa-miR-1291	NM_032291	SGIP1	.(((((((.(((((((..(((...&)))..))))..)))))))))).	5880	5902	1	-22.7	1	0.000915981	0.632	0.755944	0.0802737	-4.84971	17	22	10	3UTR		0	1
hsa-miR-1291	NM_032299	DCUN1D5	..(((((((((((.((...((((.&)))).....)).))))))))))).	3232	3256	1	-25.9	1	0.000124347	0.529	-0.0524202	0.0800626	-5.81384	17	24	11	3UTR		0	0
hsa-miR-1291	NM_032303	HSDL2	.(((((..(((((.((((......&)))).)))))..))))).	2015	2033	1	-21.8	1	0.000297648	0.603	0.314268	0.264112	-8.50749	14	18	5	3UTR		0	0
hsa-miR-1291	NM_032323	TMEM79	.((((((((.(((((..((((...&))))..)))))...)))))))).	1479	1502	1	-25.3	1	1.02814e-05	0.441	0.026562	-0.378039	-5.26888	17	23	8	3UTR		0	0
hsa-miR-1291	NM_032333	PRXL2A	((((((((......(((((((((.&))))))))))).)))))).	4476	4495	1	-24.9	1	0.000331793	0.544	-0.0507219	0.0705142	-14.554	17	19	11	3UTR		0	0
hsa-miR-1291	NM_032333	PRXL2A	.((((((((.((((((((..(((.&.))).)))))))).))..)))))).	5723	5754	1	-24.6	1	0.000106572	0.632	0.278921	0.119744	-5.03583	19	25	8	3UTR		0	0
hsa-miR-1291	NM_032339	MIEN1	.((((((...(((.((((((....&)))))).))).)))))).	1048	1066	1	-22.2	1	0.000370086	0.544	4.05847	3.11735	-9.2627	15	18	6	3UTR		0	0
hsa-miR-1291	NM_032339	MIEN1	.(((((..(((..((.((((((..&)))))))).)))))))).	844	862	1	-21.4	1	5.63183e-06	0.397	-0.130347	0.324875	-12.5196	16	18	8	3UTR		0	0
hsa-miR-1291	NM_032341	DDI2	.(((((((..((.....((((((.&)))))).......))..))))))).	1828	1853	1	-24.4	1	0.00217876	0.559	0.793222	0.958381	-9.20669	15	25	7	3UTR		0	1
hsa-miR-1291	NM_032347	ZNF397	((((((((.(((((((........&)))))))...)))))))).	1200	1219	1	-23.2	1	0.000869963	0.588	0.263745	0.168473	-4.99396	15	19	8	3UTR		0	0
hsa-miR-1291	NM_032351	MRPL45	..((((...((((..(((((....&.)))))))))...)))).	1332	1362	1	-20.1	1	2.05883e-05	0.441	0.0322346	0.370289	-11.463	13	18	9	3UTR		0	0
hsa-miR-1291	NM_032353	VPS25	.(((((((.((.(((....(((((&))))).))).)).))))))).	804	825	1	-21.1	1	3.93198e-05	0.529	1.03523	0.431337	-8.42957	17	21	7	3UTR		0	0
hsa-miR-1291	NM_032368	LZIC	..((..((((((((((((..(((.&))).))))))))))))..)).	940	961	1	-21.9	1	0.00506203	0.632	0.912762	0.416897	-10.977	17	21	12	3UTR		0	0
hsa-miR-1291	NM_032372	DYDC2	.((.(((((((((((...(((((.&.)))))...)))))..)))))))).	1448	1489	1	-21.9	1	0.0142403	0.603	0.0836506	-0.0515669	-7.0584	18	25	8	3UTR		0	0
hsa-miR-1291	NM_032385	FAXDC2	((((((((.((((((.((.((...&)).)))))).......)))))))))).	1252	1279	1	-23.6	1	0.0266895	0.441	-0.636225	-0.0674189	-5.22701	18	27	10	3UTR		0	1
hsa-miR-1291	NM_032403	PCDHGC3	..(((((..(((((..((((((((&))).))))).)))))..))))).	1157	1180	1	-26.2	1	2.65719e-05	0.456	1.10393	0.912993	-9.29552	18	23	5	3UTR		0	0
hsa-miR-1291	NM_032435	MAP3K21	((((((.(..((((((((((((((&))))))).)))))))....).).))))).	3496	3525	1	-26.9	1	0.0016477	0.618	1.20921	0.50251	-7.78016	21	29	7	3UTR		0	0
hsa-miR-1291	NM_032439	PHYHIPL	..(((((((..((((.((((.(((&.)))))))))))............))))))).	2355	2411	1	-20.7	1	0.045128	0.706	0.192642	0.809228	-9.25733	18	32	11	3UTR		0	0
hsa-miR-1291	NM_032442	NEURL4	((((((((...(((((..((((((&))))))))))))))))))).	5083	5103	1	-24.7	1	4.22599e-06	0.309	1.31627	1.75816	-9.06125	19	20	19	3UTR		0	0
hsa-miR-1291	NM_032458	PHF6	.(((((((...(((((..((.((.&)).))..)))))...))))))).	2642	2665	1	-18.6	1	0.000726269	0.603	1.24154	1.15797	-8.917	16	23	7	3UTR		0	0
hsa-miR-1291	NM_032485	MCM8	.(((((((..((.((((((((...&.)))))))))).....))))))).	6315	6344	1	-27.4	1	9.44099e-05	0.471	0.187708	0.0360218	-7.38135	17	24	10	3UTR		0	0
hsa-miR-1291	NM_032504	UNC80	.((((((((((..(((.((.((((&)))).)).))))))))))))).	12893	12915	1	-28	1	0.00176287	0.485	0.578409	0.466744	-8.42926	19	22	13	3UTR		0	0
hsa-miR-1291	NM_032518	COL25A1	(((((((..(((((((((......&)))))))))..)))..................)))).	2535	2572	1	-23.5	1	3.69404e-05	0.515	-0.22396	0.084205	-7.3076	16	37	9	3UTR		0	0
hsa-miR-1291	NM_032564	DGAT2	.((((((..(((((((........&)))))))..)))))).	2194	2210	1	-23.7	1	8.43062e-06	0.485	0.0287382	0.223983	-7.16335	13	16	7	3UTR		0	0
hsa-miR-1291	NM_032575	GLIS2	((((((((.(((.((.((......&))))))))))))))).	3661	3677	1	-23.5	1	7.54232e-08	0.412	1.4786	1.55079	-6.51614	15	16	15	3UTR		0	1
hsa-miR-1291	NM_032591	SLC9A7	.(((((.(((((((((((((((((&))))))..)))))))))))))))).	5208	5233	1	-31.2	1	0.00322693	0.603	-0.0649999	0.0831772	-5.33701	22	25	16	3UTR		0	0
hsa-miR-1291	NM_032632	PAPOLA	((((((((..(.((((((((....&)))))))).))))))))).	3076	3095	1	-19.7	1	0.00092205	0.75	2.31122	1.93057	-9.58327	17	19	9	3UTR		0	0
hsa-miR-1291	NM_032643	IRF5	.(((((.((((((...(((.((((&)))).))).))))))))))).	2248	2269	1	-25.5	1	3.84465e-06	0.397	0.885748	0.105227	-7.16235	18	21	11	3UTR		0	0
hsa-miR-1291	NM_032679	ZNF577	...(((((((.(((((((.((((.&)))).))).))))..))))))).	4680	4703	1	-24.2	1	4.74325e-05	0.471	0	0	-9.33931	18	23	7	3UTR		0	0
hsa-miR-1291	NM_032689	ZNF607	((((((((.(((.((((((((...&.)))))))).))).))))..........................)))).	3700	3774	1	-27.9	1	9.07523e-05	0.456	2.59566	0.811413	-6.28309	19	49	8	3UTR		0	0
hsa-miR-1291	NM_032704	TUBA1C	(((((((.((((.(((((((((((&)))))))))))................)))).....))))))).	2688	2732	1	-24.1	1	0.00552074	0.574	0.0718268	-0.154754	-7.54034	22	44	11	3UTR		0	0
hsa-miR-1291	NM_032726	PLCD4	...(((((.((((((.((((((..&.)))))))))))).))))).	2499	2541	1	-26.8	1	0.00140068	0.471	0.0461419	0.997664	-7.80398	17	20	12	3UTR		0	0
hsa-miR-1291	NM_032737	LMNB2	.(((((((.(((.((.(((((...&))))).)).))).))))))).	4473	4494	1	-26.1	1	4.05335e-05	0.471	2.28129	2.33891	-6.37189	17	21	7	3UTR		0	0
hsa-miR-1291	NM_032744	ADTRP	((((((.(......((((((.(((&))).))))))).)))))).	1203	1222	1	-21.6	1	0.000116248	0.603	0.550156	1.08978	-16.0977	16	19	7	3UTR		0	0
hsa-miR-1291	NM_032788	ZNF514	((.(((((.(((((((.((((...&)))).))).)))).))))).)).	4710	4733	1	-26.2	1	0.000130556	0.544	1.45006	0.429434	-6.5515	18	23	5	3UTR		0	1
hsa-miR-1291	NM_032800	C1orf198	..(((((((((...(((((((((.&))))))))).........................))))))))).	1787	1831	1	-29	1	0.000509688	0.353	0.0155589	-0.0127964	-10.4498	18	44	9	3UTR		0	0
hsa-miR-1291	NM_032800	C1orf198	.((((((((((.....(((((...&.))))).)))))))))).	1832	1861	1	-26.1	1	1.18517e-05	0.441	0.191539	-0.0710656	-10.2546	15	18	10	3UTR		0	0
hsa-miR-1291	NM_032808	LINGO1	((((((((...((((.(((((...&.)))))))))...)))))).)).	3069	3098	1	-26.9	1	0.000358164	0.294	0.0436474	0.260711	-9.29429	17	23	9	3UTR		0	0
hsa-miR-1291	NM_032826	SLC35B4	.((((((((..(((((...(((..&)))...))))).)))))))).	4614	4635	1	-21.8	1	0.000703892	0.588	-0.00139475	-0.209591	-7.86061	16	21	8	3UTR		0	0
hsa-miR-1291	NM_032846	RAB2B	((((((((.((...(((((((...&)))))))..)).)).).))))).	1928	1951	1	-21.4	1	0.000592014	0.632	0.830868	0.781912	-10.4867	17	23	7	3UTR		0	0
hsa-miR-1291	NM_032865	TNS4	.(((((((.((((((.(((((((.&)))))..)).))))))))......................))))).	2481	2527	1	-25.2	1	0.00200502	0.456	2.86542	3.12876	-5.08276	20	46	8	3UTR		0	0
hsa-miR-1291	NM_032870	PNISR	((((..(((.(((...((((((((&))))))))..))).))).)))).	3529	3552	1	-20.3	1	0.00797999	0.603	1.67223	3.16611	-13.0254	18	23	8	3UTR		0	0
hsa-miR-1291	NM_032880	IGSF21	.....((((((((((((((((((.&))))....)))..))))))))))).	1836	1861	1	-21.8	1	0.00135529	0.632	2.53516	2.32425	-13.6656	18	25	11	3UTR		0	0
hsa-miR-1291	NM_032918	RERG	(.(((((((((((((.(((((((.&)))))))..))))........))))))))).).	1632	1665	1	-29.9	1	0.00161232	0.603	4.44608	4.66989	-5.3343	21	33	9	3UTR		0	0
hsa-miR-1291	NM_032950	MMP28	..(((((((..((..((((.((((&)))).))))..))))))))).	1911	1932	1	-26.8	1	1.47494e-05	0.412	1.75451	2.04333	-10.6166	17	21	9	3UTR		0	0
hsa-miR-1291	NM_032970	SEC22C	..((((((((((((...((((...&.)))).)))))))))))).	6055	6103	1	-27.4	1	0.000310919	0.676	1.92489	2.63555	-5.9255	16	19	12	3UTR		0	0
hsa-miR-1291	NM_032975	DTNA	..((((((((..((((((.(((((&))))).)))))))))))))).	4508	4529	1	-22.1	1	0.00233046	0.588	0.810548	1.22381	-11.1286	19	21	14	3UTR		0	0
hsa-miR-1291	NM_032976	CASP10	((((((((((((............&)))))))))))).	4688	4701	1	-25.7	1	0.00617436	0.529	-0.161604	0.0412328	-7.05204	12	13	12	3UTR		0	1
hsa-miR-1291	NM_032976	CASP10	.(((((.((.((.((((((((...&))))))))))...))..))))).	2423	2446	1	-25.2	1	0.00104072	0.485	-0.355889	0.0635689	-7.86865	17	23	10	3UTR		0	1
hsa-miR-1291	NM_032977	CASP10	((((((((((((............&)))))))))))).	4780	4793	1	-25.7	1	0.00617436	0.529	0.0749633	0.0135293	-7.05204	12	13	12	3UTR		0	1
hsa-miR-1291	NM_032977	CASP10	.(((((.((.((.((((((((...&))))))))))...))..))))).	2515	2538	1	-25.2	1	0.00104072	0.485	-0.253583	-0.0950066	-7.86865	17	23	10	3UTR		0	1
hsa-miR-1291	NM_032996	CASP9	.(((((.((.((.((((((((...&))))))))))...))..))))).	2117	2140	1	-25.2	1	0.00927647	0.456	2.39616	2.96891	-7.86865	17	23	10	3UTR		0	0
hsa-miR-1291	NM_032998	DEDD	..(((((..((.(((.((((.((.&)).))))))).))...))))).	2007	2029	1	-21.6	1	0.000544607	0.574	5.01888	4.64369	-11.9069	16	22	7	3UTR		0	0
hsa-miR-1291	NM_033010	PCBP4	...(((((((..(((.((((((((&)))).)))).)))))))))).	1813	1834	1	-24.9	1	6.81716e-05	0.397	1.80787	2.30874	-12.9192	18	21	10	3UTR		0	0
hsa-miR-1291	NM_033083	EAF1	..((((((.((((..((((((...&)))))))))))))))).	4028	4045	1	-26.7	1	0.00111889	0.544	0.444579	0.868643	-7.60568	16	17	16	3UTR		0	0
hsa-miR-1291	NM_033107	GTPBP10	.((((((...(((.(((((.((..&)).))))).))))))))).	1365	1384	1	-21.5	1	0.00535272	0.529	-0.0283755	0.0669463	-9.2627	16	19	9	3UTR		0	0
hsa-miR-1291	NM_033110	GGACT	.((((((.(((((.((((((.((.&)))))))).))..........................))).)))))).	2170	2218	1	-24.1	1	3.81146e-05	0.574	3.47264	2.61501	-6.9638	19	48	8	3UTR		0	0
hsa-miR-1291	NM_033112	RRP36	..(((((((.((.((((((((.((&)).)))))))).)).))).)))).	878	902	1	-24.6	1	8.91195e-05	0.471	0.312454	0.0944163	-7.48864	19	24	8	3UTR		0	0
hsa-miR-1291	NM_033116	NEK9	.((((((.((((.((((.......&.)))))))).)))))).	5815	5838	1	-25.9	1	4.6972e-05	0.529	2.90225	2.6051	-7.39609	14	17	8	3UTR		0	0
hsa-miR-1291	NM_033117	RBM18	.((((((((..(((....(((((.&))))).....))).)))))))).	3795	3818	1	-19.7	1	0.000710027	0.588	1.10157	0.447995	-8.8291	16	23	8	3UTR		0	0
hsa-miR-1291	NM_033141	MAP3K9	..(((((.((((((((.(((((((&)))))))...))).)))))))))).	6419	6444	1	-27.5	1	2.45787e-05	0.441	0.7693	-0.105664	-7.27064	20	25	10	3UTR		0	1
hsa-miR-1291	NM_033160	ZNF658	.((((((((.((((((((......&.)))))))))))))))).	3649	3699	1	-26.3	1	0.0787948	0.662	-0.562528	-0.472839	-5.03583	16	18	16	3UTR		0	0
hsa-miR-1291	NM_033182	FBXO44	.((((((..((((....(((((((&)))))))))))...)))))).	916	937	1	-24.2	1	0.000918024	0.426	0.213134	0.544355	-8.98869	17	21	11	3UTR		0	0
hsa-miR-1291	NM_033210	ZNF502	..((.((..((((((((((((((.&)))))))))))))).))...)).	2878	2901	1	-21.9	1	0.0267256	0.691	-0.579074	0.0668574	-12.4461	18	23	14	3UTR		0	0
hsa-miR-1291	NM_033212	CCDC102A	.(((((((..(((((.((......&)).)))))..))))))).	2181	2199	1	-23.1	1	2.98057e-05	0.368	2.41979	1.59297	-6.32527	14	18	7	3UTR		0	0
hsa-miR-1291	NM_033215	PPP1R3F	(((((((.....(((((((((...&)))))))))))))).)).	2766	2784	1	-25.1	1	1.26242e-05	0.529	3.47593	2.61431	-14.7217	16	18	14	3UTR		0	0
hsa-miR-1291	NM_033317	DMKN	(((((...((((((((((((((((&)))))....)))).)))))))))))).	1757	1784	1	-27.5	1	2.29242e-06	0.471	0.192798	0.404403	-9.69585	21	27	12	3UTR		0	0
hsa-miR-1291	NM_033331	CDC14B	...((((((((((((..(((((((&))))))).)))))))))))).	2979	3000	1	-25.3	1	0.00020989	0.529	-0.118971	0.178813	-6.74759	19	21	12	3UTR		0	0
hsa-miR-1291	NM_033331	CDC14B	(((.(((((((....(((.(((((&)))))..)))..)))))))))).	3514	3537	1	-24.8	1	2.13958e-05	0.412	1.62719	0.808154	-13.1978	18	23	10	3UTR		0	0
hsa-miR-1291	NM_033389	SSH2	((((.(((((((((((.(((((((&))))))).)))))))))))..)))).	4590	4616	1	-30.6	1	0.00145016	0.574	0.978139	1.33416	-8.05661	22	26	11	3UTR		0	0
hsa-miR-1291	NM_033423	GZMH	.(((((((((((...(((......&.)))...))))))))))).	854	899	1	-24.1	1	0.000489911	0.456	0.628209	-0.10473	-6.67474	14	19	11	3UTR		0	0
hsa-miR-1291	NM_033503	BMF	.(.(((((.((((((.((.((...&.)).)).)))))).))))).).	1291	1326	1	-25.4	1	7.47327e-06	0.456	0.554098	0.588703	-6.6403	16	22	6	3UTR		0	0
hsa-miR-1291	NM_033542	SYS1	.((((((.((((.((((((((((.&))))))))))........)))).)))))).	750	780	1	-29.1	1	0.000121731	0.485	1.20844	0.877797	-7.39609	20	30	10	3UTR		0	0
hsa-miR-1291	NM_033637	BTRC	.((((..(((((.((((((((.((&.)).)))))))).))))))))).	1979	2015	1	-27.8	1	6.24778e-06	0.412	1.87533	1.5497	-8.5271	19	23	9	3UTR		0	1
hsa-miR-1291	NM_033637	BTRC	(((((((..((((.(.(((((.((&)).))))).).))))..))))))).	3403	3428	1	-26.5	1	3.04174e-05	0.441	0.305638	0.273775	-8.39749	19	25	7	3UTR		0	1
hsa-miR-1291	NM_033644	FBXW11	.((((((((((.....(((((((.&.))))))))))))))))).	2511	2546	1	-30.1	1	0.000359628	0.529	2.63969	2.63693	-10.2546	17	19	17	3UTR		0	0
hsa-miR-1291	NM_033645	FBXW11	.((((((((((.....(((((((.&.))))))))))))))))).	2448	2483	1	-30.1	1	0.000359628	0.529	3.6707	2.38829	-10.2546	17	19	17	3UTR		0	0
hsa-miR-1291	NM_052827	CDK2	.((((((((..((((..(((((..&)))))...)))).)))))))).	1820	1842	1	-23.6	1	0.000203245	0.588	1.27652	1.01277	-8.09365	17	22	8	3UTR		0	0
hsa-miR-1291	NM_052834	WDR7	..((((.((((((.(((((((((.&))).))))))..)))))))))).	5908	5931	1	-21.2	1	0.00161473	0.691	0.606205	0.590833	-7.35753	19	23	10	3UTR		0	0
hsa-miR-1291	NM_052855	ANKRD40	.((((..((.((.((((((((...&))))))))))....)).)))).	2187	2209	1	-22.8	1	2.58293e-05	0.441	3.20945	1.68338	-9.76961	16	22	10	3UTR		0	0
hsa-miR-1291	NM_052864	TIFA	.((((((((((.(((.........&))).))))))).))).	3476	3492	1	-21.9	1	1.45943e-05	0.441	2.17097	2.15324	-7.37318	13	16	7	3UTR		0	0
hsa-miR-1291	NM_052909	PLEKHG4B	((((((((.((.....((((((((&))))))))..................)))))))))).	8274	8311	1	-29.5	1	1.27689e-05	0.279	-0.52879	-0.379659	-11.4552	18	37	10	3UTR		0	0
hsa-miR-1291	NM_052911	ESCO1	((((((((.((((((..((((((.&)))))).)))....)))....)))))))).	3482	3512	1	-21.2	1	0.000491144	0.588	0.798535	1.14815	-5.22701	20	30	8	3UTR		0	0
hsa-miR-1291	NM_052927	PWWP2A	.((((.(((.....((((((((((&))))))))))))).)).)).	1748	1768	1	-22.2	1	5.69221e-06	0.515	0.9449	0.595241	-15.2543	17	20	13	3UTR		0	0
hsa-miR-1291	NM_052937	PCMTD1	((((((((.(((.....((((.((&.)).))))....))))))))))).	2165	2212	1	-23.3	1	4.22138e-05	0.441	2.04702	1.5307	-8.10843	17	24	11	3UTR		0	0
hsa-miR-1291	NM_052941	GBP4	...((((((((.....(((((...&))))).....)))))))).	5560	5579	1	-22.9	1	0.000298825	0.529	2.53323	2.15339	-12.9758	13	19	8	3UTR		0	1
hsa-miR-1291	NM_052968	APOA5	.(((((..(((..((((((((((.&))))))).)))...................)))..))))).	1696	1737	1	-24.6	1	0.0142767	0.412	-0.125662	0.543036	-12.2866	18	41	7	3UTR		0	0
hsa-miR-1291	NM_053052	SNAP47	.(((((((((((..(.(((((...&))))).)..))))..))))))).	1425	1448	1	-28.2	1	5.15056e-06	0.279	3.93446	2.02262	-6.17234	17	23	7	3UTR		0	0
hsa-miR-1291	NM_053064	GNG2	.(((((((((((((((...((((.&.))))....))))))))))....))))).	1962	2042	1	-26.7	1	0.000173553	0.603	-0.0252502	-0.0150325	-3.79332	19	29	10	3UTR		0	0
hsa-miR-1291	NM_053276	VIT	..((((((.((.(((((.......&))))).)))))))).	2459	2474	1	-22.3	1	0.000124503	0.529	-0.108712	-0.244916	-9.36019	13	15	8	3UTR		0	0
hsa-miR-1291	NM_053282	SH2D1B	.((((((((((((.(...((((..&.))))....).)))))))))))).	2224	2264	1	-21	1	0.000936822	0.662	0.654834	1.0061	-4.88321	17	24	12	3UTR		0	0
hsa-miR-1291	NM_054027	ANKH	....(((((((((...((.(((((&))))).)).....))))))))).	1829	1852	1	-25.4	1	0.000462715	0.412	-0.260363	0.0204367	-11.3719	16	23	9	3UTR		0	0
hsa-miR-1291	NM_054108	PLAAT5	.((((((((.(((.((....((((&))))....)).))).)))))))).	1476	1500	1	-21.9	1	0.000156739	0.603	0.0698391	0.246147	-5.89267	17	24	8	3UTR		0	0
hsa-miR-1291	NM_057161	KLHDC3	.((((((.((((((..((((((..&))))).)..)))))).))).))).	1445	1469	1	-25.6	1	0.000934544	0.382	2.00446	0.970636	-7.07546	18	24	6	3UTR		0	0
hsa-miR-1291	NM_057175	NAA15	((((((((((.....(((((((.(&).)))))))))))))).....))).	4241	4266	1	-23.7	1	0.00694099	0.574	1.40543	0.657222	-12.9906	18	25	14	3UTR		0	0
hsa-miR-1291	NM_058186	FAM3B	.((((((..(((((..(((((((.&)))))))...............))))))))))).	1195	1229	1	-25.2	1	0.000109592	0.544	-0.0312527	-0.650347	-8.13185	18	34	11	3UTR		0	0
hsa-miR-1291	NM_058190	FAM207A	.((((((.((....((((((.((.&.))))))))....)))))))).	807	845	1	-22.6	1	5.912e-07	0.412	-0.352161	-0.786702	-14.4245	16	22	8	3UTR		0	0
hsa-miR-1291	NM_058192	RPUSD1	.(((((((.(((.((.((((.(((&))).)))))).)))))))))).	1986	2008	1	-26.9	1	5.7e-07	0.441	-0.71293	-1.39243	-6.37189	19	22	10	3UTR		0	0
hsa-miR-1291	NM_058222	TECTB	.((((((((((..((.........&))..)))))))))).	1435	1450	1	-21.1	1	0.00682947	0.544	0.0102349	0.207307	-8.66231	12	15	10	3UTR		0	0
hsa-miR-1291	NM_058246	DNAJB6	(((((((((((.(.(((.......&)))..).))))))))))).	1856	1875	1	-23.2	1	2.09187e-05	0.441	-0.289171	-0.626369	-8.14122	15	19	11	3UTR		0	0
hsa-miR-1291	NM_078488	VNN2	(((((((((...............&))))))))).	1836	1846	1	-18	1	0.000136394	0.515	1.1411	0.69716	-14.4661	9	10	9	3UTR		0	1
hsa-miR-1291	NM_078628	MSL3	((((((((.(((....(((.(((.&))).)))))))))))))).	2085	2104	1	-22.3	1	5.51547e-06	0.441	0.0943504	-0.0334146	-8.10843	17	19	14	3UTR		0	0
hsa-miR-1291	NM_080283	ABCA9	(((((((.(((.....(((((((.&)))))))..)).).))))))).	5842	5864	1	-23.3	1	0.0326825	0.397	0.783166	0.474686	-12.7125	17	22	7	3UTR		0	0
hsa-miR-1291	NM_080607	VSTM2L	((((((((...(....((((((..&))))))..).)))))))).	1110	1129	1	-24.4	1	1.38575e-07	0.324	0.257259	0.592299	-12.1757	15	19	8	3UTR		0	0
hsa-miR-1291	NM_080616	NOL4L	...(((((((((.((.(((((...&)))))))))))))))).	4087	4104	1	-29.7	1	0.000104075	0.603	4.57944	3.61573	-8.03672	16	17	16	3UTR		0	1
hsa-miR-1291	NM_080792	SIRPA	.(((.((.((((.(((((((((.(&).))))))))).)))).)).))).	4488	4512	1	-24.3	1	0.00539918	0.603	0.102101	-0.013148	-11.5151	19	24	9	3UTR		0	0
hsa-miR-1291	NM_080826	ISM1	..((((.(.((((((((((((((.&))))))).......................))))))).).)))).	2503	2548	1	-23.8	1	0.000969562	0.588	0.47476	0.260219	-7.55708	19	45	7	3UTR		0	0
hsa-miR-1291	NM_080827	WFDC6	.((((((((((((((.((..((..&))..))))))))))....................)))))).	564	605	1	-20.7	1	0.00142452	0.512	0	0	-4.02637	18	41	10	3UTR		0	0
hsa-miR-1291	NM_080874	ASB5	.((((((((...(((((..(((..&)))..))))).....)))))))).	2294	2318	1	-22.7	1	0.0116309	0.75	3.44021	3.36596	-11.2074	16	24	8	3UTR		0	1
hsa-miR-1291	NM_080881	DBN1	(((((((((((...((((.((.((&.))))))))..))))))))))).	2820	2889	1	-26.9	1	0.00451885	0.309	-0.264715	0.197359	-9.43035	19	23	11	3UTR		0	1
hsa-miR-1291	NM_130797	DPP6	.(((((.((((..(((.((((((.&)))))))))..))))))))).	3676	3697	1	-22.6	1	0.000438392	0.471	-0.00233333	0.436625	-9.97295	18	21	9	3UTR		0	0
hsa-miR-1291	NM_133263	PPARGC1B	(((((((((((((((..((((.((&)).)))).)))))))).))))))).	7045	7070	1	-24	1	0.000573229	0.544	0.164549	0.238583	-4.17062	21	25	8	3UTR		0	0
hsa-miR-1291	NM_133264	WIPF2	.((((((.((.((((.(((((...&))))))))))))))))).	2634	2652	1	-23.9	1	1.37117e-05	0.471	0.47269	0.223851	-9.16478	17	18	17	3UTR		0	0
hsa-miR-1291	NM_133264	WIPF2	(((((.((.(((((..((((((.(&).))))))..)).))).)).).)))).	6864	6891	1	-22.6	1	0.000183542	0.529	0.516362	-0.0762586	-7.86342	19	27	6	3UTR		0	0
hsa-miR-1291	NM_133459	CCBE1	(.((((((((((((((((..((((&)))).)).))))))))).....))))).).	1751	1781	1	-22.8	1	0.00474345	0.529	0.190142	0.30752	-5.10125	21	30	9	3UTR		0	0
hsa-miR-1291	NM_133464	ZNF483	.((((..(((((((..((.((((.&)))).))...))))))).)))).	5680	5703	1	-25.7	1	0.00539759	0.603	0.026143	0.177263	-8.20647	17	23	7	3UTR		0	0
hsa-miR-1291	NM_133473	ZNF431	..((((.(.((((((....(((((&))))).)))))).).)))).	6058	6078	1	-21.5	1	0.000313961	0.5	-0.0367636	0.0428781	-7.79013	16	20	6	3UTR		0	0
hsa-miR-1291	NM_133486	MBNL3	..((((((((((.(((.(((((((&)))).)))))))))))))))).	6078	6100	1	-25	1	1.56021e-05	0.559	2.0795	1.9319	-6.24613	20	22	16	3UTR		0	1
hsa-miR-1291	NM_133486	MBNL3	..(((((((((((....(((((((&)))))))....))))........))))))).	9798	9829	1	-24.7	1	0.0149375	0.559	1.0308	1.5847	-6.78234	18	31	7	3UTR		0	1
hsa-miR-1291	NM_133629	RAD51D	.(((((.((.(.(((((((((...&))))))))).)..))..))))).	5081	5104	1	-26.1	1	3.37e-05	0.426	-0.192148	-0.0901755	-9.92632	17	23	9	3UTR		0	0
hsa-miR-1291	NM_133646	MAP3K20	...(((((.(((((((.((((((.&)))))).))))))))).))).	3346	3367	1	-24.3	1	1.04857e-05	0.603	-0.0730724	-0.0611894	-7.57093	18	21	9	3UTR		0	1
hsa-miR-1291	NM_134261	RORA	.(((((((.(((..((((((((..&.)))).))))..))))).))))).	3499	3561	1	-23.7	1	0.000794179	0.485	0.460196	0.118259	-6.99569	18	24	5	3UTR		0	0
hsa-miR-1291	NM_134261	RORA	((((((((((.(((((...(((((&)))))...))))).)....))))))))).	1766	1795	1	-22.9	1	0.00114143	0.515	3.35406	3.76797	-6.76235	20	29	9	3UTR		0	0
hsa-miR-1291	NM_134262	RORA	.(((((((.(((..((((((((..&.)))).))))..))))).))))).	3379	3421	1	-23.7	1	0.000794179	0.485	0.209878	0.222101	-6.99569	18	24	5	3UTR		0	0
hsa-miR-1291	NM_134262	RORA	((((((((((.(((((...(((((&)))))...))))).)....))))))))).	1626	1655	1	-22.9	1	0.00114143	0.515	0.979344	0.79492	-6.76235	20	29	9	3UTR		0	0
hsa-miR-1291	NM_134428	RFX3	.((((((.(((......((((((.&))))))...))).)))))).	3383	3403	1	-23.9	1	5.69211e-06	0.588	0.735928	1.09257	-12.5682	15	20	6	3UTR		0	1
hsa-miR-1291	NM_134442	CREB1	..((((((((((((((((((.(((&)))..)))))))))...))))))))).	7133	7160	1	-21.5	1	0.00977865	0.529	1.24772	2.43986	-4.957	21	27	9	3UTR		0	0
hsa-miR-1291	NM_138300	PYGO2	.((((((.(((....(((.(((..&))))))...))).)))))).	3121	3141	1	-21.6	1	0.00786252	0.588	0.2585	0.337451	-12.3352	15	20	6	3UTR		0	0
hsa-miR-1291	NM_138317	KCNK10	.(((((((((.(((((((.(((((&)))))))......)))))....))))))))).	7129	7161	1	-25.3	1	0.000572808	0.456	2.70591	1.18013	-6.6181	21	32	9	3UTR		0	0
hsa-miR-1291	NM_138318	KCNK10	.(((((((((.(((((((.(((((&)))))))......)))))....))))))))).	6780	6812	1	-25.3	1	0.000572808	0.456	4.61776	4.71464	-6.6181	21	32	9	3UTR		0	0
hsa-miR-1291	NM_138348	OTULIN	.((((..((((..((((((((.((&))...))))))))..)).))..)))).	5501	5528	1	-25.1	1	0.000267876	0.412	-0.143972	0.0302797	-11.8739	18	27	8	3UTR		0	0
hsa-miR-1291	NM_138369	BOD1	..(((.((((((((((((((((((&))))...)))))))))))))).))).	1719	1745	1	-26.5	1	0.00365551	0.529	0.0027516	0.279028	-6.85796	21	26	14	3UTR		0	0
hsa-miR-1291	NM_138375	CABLES1	..((((((((((.((.((.(((((&))))).))))))).))))))).	4133	4155	1	-25.5	1	1.1634e-07	0.397	-0.224886	-0.340889	-6.47918	19	22	7	3UTR		0	1
hsa-miR-1291	NM_138376	TTC5	(((.((..(.(((((((((.(...&).))))))))).)..)).))).	2060	2082	1	-22.9	1	0.00965929	0.559	0.231155	0.231129	-12.0694	16	22	9	3UTR		0	1
hsa-miR-1291	NM_138410	CMTM7	..((((((((((..(.((((((((&)))))))))))).))))))).	1810	1831	1	-29.7	1	2.91195e-06	0.406	-0.147904	-0.0825705	-7.33602	19	21	12	3UTR		0	0
hsa-miR-1291	NM_138453	RAB3C	..((((((((....((((((((..&)))).))))..)))))))).	7971	7991	1	-24.1	1	0.00807132	0.603	0.0838549	-0.108206	-13.2745	16	20	8	3UTR		0	0
hsa-miR-1291	NM_138492	PRELID2	..((((((((.((.(((((((((.&))))))))).))..........)))))))).	1146	1177	1	-30.2	1	0.000755289	0.456	-0.213696	-0.313917	-8.63862	19	31	9	3UTR		0	0
hsa-miR-1291	NM_138572	TAF8	(((((.((.(((((..((((((.(&).))))))..)).))).)).).)))).	5036	5063	1	-22.6	1	0.000162055	0.485	-0.136247	0.0235754	-7.86342	19	27	6	3UTR		0	0
hsa-miR-1291	NM_138620	DDX31	.((((...((((.((((((((((.&)))))))))).)))))))).	2048	2068	1	-25.8	1	0.000363626	0.485	0.289067	-0.0638771	-10.8407	18	20	10	3UTR		0	0
hsa-miR-1291	NM_138636	TLR8	((((((((((((..(.(((((((.&))))))).)..)))))....))))))).	3332	3360	1	-26	1	0.000540682	0.471	0	0	-6.31659	20	28	7	3UTR		0	0
hsa-miR-1291	NM_138638	CFL2	((((((((.((((....((((((.&)))))))))).)))))))).	2034	2054	1	-23.5	1	0.00146456	0.544	0.589427	0.575108	-6.8193	18	20	10	3UTR		0	0
hsa-miR-1291	NM_138713	NFAT5	..((((((((((((((((((((((&))))))))..................)))))))))................))))).	5465	5522	1	-22.9	1	0.001651	0.662	1.43269	0.606296	-4.957	22	57	9	3UTR		0	0
hsa-miR-1291	NM_138715	MSR1	((((((((..(((..((((((((.&.))))))))..))).........)))))))).	2369	2427	1	-26	1	0.00147127	0.515	-0.204457	2.10432	-7.82876	19	32	8	3UTR		0	0
hsa-miR-1291	NM_138716	MSR1	((((((((..(((..((((((((.&.))))))))..))).........)))))))).	2180	2238	1	-26	1	0.00147127	0.515	0.272201	0.907738	-7.82876	19	32	8	3UTR		0	0
hsa-miR-1291	NM_138716	MSR1	((.((((((((((((((..(((.(&).)))))))))))))....)))).)).	2140	2167	1	-21.9	1	4.42395e-05	0.471	0.255779	0.214137	-5.49511	20	27	13	3UTR		0	0
hsa-miR-1291	NM_138727	ST7L	.((((.((((((((((((.(((((&.)))))........))).))))))))).).))).	3866	3910	1	-27.1	1	0.0102515	0.559	5.21296	4.37619	-5.69428	21	34	9	3UTR		0	1
hsa-miR-1291	NM_138728	ST7L	.((((.((((((((((((.(((((&.)))))........))).))))))))).).))).	3824	3868	1	-27.1	1	0.0102515	0.559	6.04866	5.43345	-5.69428	21	34	9	3UTR		0	1
hsa-miR-1291	NM_138737	HEPH	....(.((((((((.((((((...&)))))).)))))))).).	5334	5352	1	-23.7	1	0.00271964	0.632	0.167653	0.0671496	-12.183	15	18	8	3UTR		0	0
hsa-miR-1291	NM_138799	MBOAT2	.((((((...((((((((((((((&)))))))))))))).))).))).	7513	7536	1	-21.9	1	0.0127945	0.632	1.12582	1.59804	-8.40586	20	23	14	3UTR		0	0
hsa-miR-1291	NM_138927	SON	((((((...(((....(((((((.&))))))).))).....)))))).	7885	7908	1	-24.8	1	0.000153455	0.574	3.92648	2.15725	-11.9658	16	23	7	3UTR		0	0
hsa-miR-1291	NM_138969	SDR16C5	.(((((((.((.....(((((((.&))))..)))..))))))))).	1414	1435	1	-21.9	1	0.000125715	0.368	-0.0469527	-0.537355	-11.311	16	21	9	3UTR		0	0
hsa-miR-1291	NM_138972	BACE1	.(((((((.(((.((.((((..((&))..)))).)).)))))))))).	2854	2877	1	-23	1	2.20028e-05	0.412	-0.224031	0.541088	-6.37189	18	23	10	3UTR		0	0
hsa-miR-1291	NM_138992	BACE2	.((((((((...((((((......&)).))))...)))))))).	3267	3286	1	-23	1	0.00134246	0.397	-0.2935	-0.336519	-11.2074	14	19	8	3UTR		0	0
hsa-miR-1291	NM_139125	MASP1	.((((((.((((....((((((((&))))))))...))........)).)).)))).	2975	3007	1	-24	1	2.10867e-06	0.456	3.77731	3.37173	-9.22143	18	32	8	3UTR		0	0
hsa-miR-1291	NM_139126	PPIL4	.((((.((((.(((((((((((((&)))))).....))))))).))))..)))).	2423	2453	1	-23.7	1	0.0186572	0.639	4.14195	2.13321	-8.51906	21	30	7	3UTR		0	0
hsa-miR-1291	NM_139132	NUP98	((((((((((.....((((((...&)))))))))))))))).	6335	6352	1	-26	1	4.55415e-06	0.471	1.25449	2.75984	-12.9906	16	17	16	3UTR		0	0
hsa-miR-1291	NM_139132	NUP98	.(((...(((((((((((((....&)))))))))))))..))).	6085	6104	1	-23.5	1	0.00137183	0.5	4.37149	4.52077	-11.357	16	19	13	3UTR		0	0
hsa-miR-1291	NM_139166	ABRA	.((((..((..((((((((((...&))))))))))....))..)))).	1498	1521	1	-25.6	1	0.0499324	0.515	-0.0744415	0.149863	-11.3053	16	23	10	3UTR		0	0
hsa-miR-1291	NM_139241	FGD4	.((((((.(((.((((((((....&.)))))))).))))))))).	5507	5542	1	-20.9	1	0.00222411	0.662	0.928746	0.588776	-9.45376	17	20	9	3UTR		0	0
hsa-miR-1291	NM_139245	PPM1L	.((((((((((.(((((((.(((.&))).))))))).))))....................))).))).	1285	1329	1	-26.1	1	0.000523722	0.559	0.499239	0.769322	-7.14013	20	44	7	3UTR		0	0
hsa-miR-1291	NM_139314	ANGPTL4	(((((((((((((...(((((...&)))))....)))).........))))))))).	1658	1690	1	-23.8	1	2.32723e-05	0.353	0.353684	0.236873	-5.76291	18	32	9	3UTR		0	0
hsa-miR-1291	NM_139319	SLC17A8	((((((((.(.((.((((......&)))).)).).)))))))).	2628	2647	1	-23	1	0.00594383	0.515	-0.134894	-0.0171793	-8.67558	15	19	8	3UTR		0	0
hsa-miR-1291	NM_139323	YWHAB	.(((((((((((((((((......&.))).))))..)).)))))))).	2010	2039	1	-22.1	1	0.00285057	0.618	1.09101	0.540441	-3.79332	17	23	8	3UTR		0	0
hsa-miR-1291	NM_144573	NEXN	((((((((.((..(((........&)))..)))))))))).	2362	2378	1	-19.6	1	0.000306818	0.529	3.04527	1.48719	-9.6299	13	16	10	3UTR		0	0
hsa-miR-1291	NM_144586	LYPD1	.((((((.((((.((((((.(((.&))))))))))))........).)))))).	3085	3114	1	-24	1	8.66761e-06	0.441	3.88416	4.39938	-7.39609	19	29	12	3UTR		0	0
hsa-miR-1291	NM_144597	C15orf40	(((((((((.((..(((((((.((&)))))).))))).))))))))).	8598	8621	1	-23.1	1	0.000708845	0.5	0.208591	0.0365785	-7.32605	20	23	9	3UTR		0	0
hsa-miR-1291	NM_144613	COX6B2	..(((((.(((.....(((((((.&)))))))......))).))))).	1446	1469	1	-23.8	1	0.00377431	0.471	-0.140622	0.621137	-13.7319	15	23	7	3UTR		0	0
hsa-miR-1291	NM_144659	TCP10L	((((((((((((.((.((.(((((&))))).)).)).....)))..))))))))).	2553	2584	1	-27.7	1	0.000987315	0.426	-0.0113836	0.0874226	-5.45975	21	31	9	3UTR		0	0
hsa-miR-1291	NM_144660	SAMD8	.((((((.((((..(((((((((.&)))))))))....................)))))))))).	1879	1919	1	-25.1	1	9.90234e-05	0.632	0.691042	0.785617	-8.25293	19	40	10	3UTR		0	0
hsa-miR-1291	NM_144660	SAMD8	(.((((.((((((((....(((((&))))).......)))))))).)))).).	5387	5415	1	-24.4	1	0.000111098	0.529	0.133266	-0.0370589	-6.87799	18	28	8	3UTR		0	0
hsa-miR-1291	NM_144665	SESN3	(.((((((...(((((((.(((..&)))))))))))))))).).	4448	4467	1	-21.9	1	0.00363497	0.676	0.143638	0.341522	-10.2249	17	19	16	3UTR		0	0
hsa-miR-1291	NM_144684	ZNF480	.(((((..(((((((.((.((...&)).)))))))))...))))).	2432	2453	1	-22.7	1	2.25667e-05	0.603	0.249701	-0.316708	-7.8837	16	21	9	3UTR		0	0
hsa-miR-1291	NM_144693	ZNF558	.((((((((((((.(.(((((...&.))))))...)))))))))))).	5707	5758	1	-29.3	1	0.000195416	0.5	1.14233	1.37292	-4.88321	18	23	12	3UTR		0	0
hsa-miR-1291	NM_144699	ATP1A4	..(((((((((.(((.(((((...&)))))))).))....))).)))).	3662	3686	1	-24	1	0.0229851	0.397	-0.32389	0.164329	-8.53685	17	24	8	3UTR		0	0
hsa-miR-1291	NM_144719	CCDC13	(((((((..(((...(((((((..&.)))))))..)))))))))).	3095	3124	1	-26.8	1	3.52746e-05	0.368	-0.234861	-0.36034	-10.189	17	21	10	3UTR		0	0
hsa-miR-1291	NM_144722	SPEF2	((((((((((((...(((......&)))...))))).....))))))).	2240	2264	1	-19.6	1	0.00380484	0.647	-0.160696	-0.162224	-6.81899	15	24	7	3UTR		0	0
hsa-miR-1291	NM_144969	ZDHHC15	..((((((.(((((((...(((((&))))).))))))))))).)).	4710	4731	1	-25.9	1	0.000267103	0.647	4.24975	3.48131	-6.01339	18	21	11	3UTR		0	0
hsa-miR-1291	NM_144969	ZDHHC15	.(((((((.(..((((.((((.((&)).))))))))..)))))))).	4095	4117	1	-23.8	1	0.000533756	0.544	0.545326	0.390886	-11.0213	18	22	8	3UTR		0	0
hsa-miR-1291	NM_144973	DENND5B	.(((((((((.((((((..((...&))...))))))))))))))).	5043	5064	1	-23.3	1	7.37079e-05	0.471	-0.134803	2.153	-6.6181	17	21	15	3UTR		0	0
hsa-miR-1291	NM_144988	ALG14	.(((((..((((((..((((((((&)))).)))).))))))))))).	2450	2472	1	-26	1	0.0017939	0.529	0.260554	0.156789	-8.61914	19	22	11	3UTR		0	0
hsa-miR-1291	NM_144994	ANKRD23	.(((((.(.((....(((((((((&)))))))))..))).))))).	2123	2144	1	-27.7	1	5.58247e-09	0.456	1.78938	1.56724	-12.6216	17	21	9	3UTR		0	0
hsa-miR-1291	NM_145010	ENKUR	.(((((((((((..((((.((...&.)).))))..)))....................)))))).)).	1939	2009	1	-22.3	1	0.00681993	0.456	0.548241	0.149111	-5.9393	17	43	6	3UTR		0	0
hsa-miR-1291	NM_145011	ZNF25	..((((((((.(((((........&.))))).)))))))).	1909	1950	1	-21	1	2.19069e-05	0.574	-0.478612	-0.173027	-7.78178	13	16	8	3UTR		0	0
hsa-miR-1291	NM_145026	SPATS1	((((..((((((.(((.((((((.&))))))))).))))))..)))).	2383	2406	1	-23.9	1	0.00271612	0.618	0.121834	0.154939	-11.2467	19	23	9	3UTR		0	0
hsa-miR-1291	NM_145027	KIF6	((((((((........((((((((&.)))))))))))))))).	2762	2787	1	-28.5	1	1.82017e-07	0.353	-0.296179	-0.276694	-15.5225	16	18	16	3UTR		0	0
hsa-miR-1291	NM_145049	UBLCP1	.((.((((((((.(((((.((...&.))))))))))))))))).	1648	1690	1	-26.2	1	1.97878e-05	0.588	0.553303	0.913459	-8.11448	17	19	17	3UTR		0	0
hsa-miR-1291	NM_145074	HTRA2	.(((((.(((((((((((((.(((&.)))))))))).......))))).).))))).	2046	2099	1	-28.4	1	1.91673e-06	0.412	0.413465	0.284052	-5.33701	21	32	10	3UTR		0	0
hsa-miR-1291	NM_145167	PIGM	..((..(((.(((((.((((((((&)))))))))))))))).)).	6459	6479	1	-23.4	1	0.0049416	0.662	1.05308	2.30468	-12.4526	18	20	16	3UTR		0	0
hsa-miR-1291	NM_145168	SDR42E1	.(((((((..(((((...(((((.&))))).)))))..))))))).	7280	7301	1	-25.7	1	0.000541545	0.456	-0.0452849	0.0924632	-6.32527	17	21	7	3UTR		0	0
hsa-miR-1291	NM_145185	MAP2K7	((((((((......(((((((.((&)).))))))).)))))))).	3005	3025	1	-25.9	1	8.1635e-09	0.309	-0.11233	0.0644024	-14.554	17	20	8	3UTR		0	0
hsa-miR-1291	NM_145212	MRPL30	.(((((((.((.((((.((((((.&)))))).)))).)).))))))).	1181	1204	1	-23.5	1	0.000221414	0.559	-0.205885	-0.104788	-8.19652	19	23	7	3UTR		0	0
hsa-miR-1291	NM_145212	MRPL30	.(((((.((.((.((((((((...&))))))))))...))..))))).	1389	1412	1	-22.7	1	0.000336869	0.471	0.001364	-0.346813	-7.86865	17	23	10	3UTR		0	0
hsa-miR-1291	NM_145232	CTU1	.((((.((.((((((((((((((.&)))))))).))........)))))).)))).	1550	1581	1	-24	1	0.0048996	0.412	1.55423	3.02533	-6.75067	20	31	8	3UTR		0	0
hsa-miR-1291	NM_145246	FRA10AC1	.((((..((.((((.((((((...&)))))).))))...))..)))).	1614	1637	1	-22.7	1	0.0185595	0.412	0.3639	-0.0292962	-9.21593	16	23	6	3UTR		0	0
hsa-miR-1291	NM_145269	CIBAR1	(((((((....((((.(((((...&)))))....))))....))))))).	2337	2362	1	-24.1	1	0.0182275	0.574	0.291214	0.15501	-11.6079	16	25	7	3UTR		0	0
hsa-miR-1291	NM_145269	CIBAR1	...((((..((((((.(((((...&.)))))))).............)))..)))).	3264	3306	1	-20.6	1	0.000376999	0.515	-0.050649	0.0530117	-10.1176	15	32	8	3UTR		0	0
hsa-miR-1291	NM_145273	CD300LG	((((((((.((((.(..(((((((&)))))))..).)))))))))))).	1305	1329	1	-33.7	1	2.17246e-06	0.412	-0.714135	-0.327689	-6.08385	20	24	12	3UTR		0	0
hsa-miR-1291	NM_145284	FAM122B	..(((((.(((((((....(((((&)))))))).)))).))))).	2092	2112	1	-21.6	1	4.98828e-06	0.632	0	0	-7.50368	17	20	8	3UTR		0	0
hsa-miR-1291	NM_145650	MUC15	((((((((..((((.....(((((&.))))).)))).)))))))).	1859	1889	1	-21.9	1	0.0021492	0.485	-0.18019	-0.12405	-7.20497	17	21	8	3UTR		0	0
hsa-miR-1291	NM_145701	CDCA4	.(((((...((((((((((((...&))))))))))))....................)).))).	1106	1145	1	-26.2	1	3.87719e-05	0.397	4.89657	1.6116	-8.70704	17	39	12	3UTR		0	0
hsa-miR-1291	NM_145701	CDCA4	(((((((((..(.((.((..(((.&)))..)))).)..))))))))).	1161	1184	1	-22.6	1	2.45056e-05	0.397	1.77987	3.06005	-9.52704	17	23	9	3UTR		0	0
hsa-miR-1291	NM_145702	TIGD1	..((.(((((((.((((((((((.&)))))))))).)))).))).)).	2529	2552	1	-24.6	1	0.000300618	0.632	-0.208279	-0.274415	-10.3652	19	23	10	3UTR		0	0
hsa-miR-1291	NM_145735	ARHGEF7	.((((..((((((((.(((.((((&))))))))))))))).....)))).	4152	4177	1	-22.8	1	0.0167604	0.485	1.01182	-0.0712219	-7.47102	19	25	15	3UTR		0	0
hsa-miR-1291	NM_145793	GFRA1	..((((.((((((((..(((.(((&)))..)))..)))))))).)))).	4235	4259	1	-25.1	1	9.86164e-06	0.5	0.166299	0.0629749	-6.73374	18	24	8	3UTR		0	0
hsa-miR-1291	NM_145863	ASB3	((((((...((.(((((((((...&))).)))))).)))))))).	1615	1635	1	-22.6	1	0.00138427	0.632	3.44716	2.56771	-12.1981	17	20	8	3UTR		0	0
hsa-miR-1291	NM_145866	FZD3	.((((((((((.(((.(((.....&)))..)))....)))))))))).	12999	13022	1	-23.7	1	9.84168e-06	0.588	0.282704	0.282704	-7.37318	16	23	10	3UTR		0	0
hsa-miR-1291	NM_145866	FZD3	.((((..((.(.(((((((((...&))))))))).)..))..)))).	6963	6985	1	-25.3	1	0.00532417	0.485	-0.0216878	0.0226539	-11.8273	16	22	9	3UTR		0	0
hsa-miR-1291	NM_145868	ANXA11	....((((((((((..(((((((.&))))).))..)))))))))).	5891	5912	1	-27.5	1	0.00382315	0.485	4.61153	2.66618	-10.5151	17	21	10	3UTR		0	0
hsa-miR-1291	NM_147128	ZNRF2	((((((((((......((((....&.)))).......)))))))))).	2782	2821	1	-23.6	1	0.000663078	0.676	1.58355	1.64732	-13.2236	14	23	10	3UTR		0	0
hsa-miR-1291	NM_147150	PALM2AKAP2	(.(((((..((((((.(((((((.&)))))))))))))..).)).)).).	4955	4980	1	-24.6	1	0.00363888	0.603	1.25542	1.90449	-8.70432	19	25	13	3UTR		0	0
hsa-miR-1291	NM_147180	PPP3R2	((((..((((((((((((((((..&)))))))..)))))).))))))).	1772	1796	1	-21.6	1	0.00221432	0.618	0.0421302	-0.0385184	-9.95757	20	24	7	3UTR		0	0
hsa-miR-1291	NM_147781	CTSB	.((((((((((.....(((((...&.))))))))))))))).	2750	2787	1	-29.1	1	6.84867e-05	0.5	0	0	-10.2546	15	17	15	3UTR		0	0
hsa-miR-1291	NM_147782	CTSB	.((((((((((.....(((((...&.))))))))))))))).	2719	2756	1	-29.1	1	6.84867e-05	0.5	0	0	-10.2546	15	17	15	3UTR		0	0
hsa-miR-1291	NM_147783	CTSB	.((((((((((.....(((((...&.))))))))))))))).	2705	2742	1	-29.1	1	6.84867e-05	0.5	0	0	-10.2546	15	17	15	3UTR		0	0
hsa-miR-1291	NM_148898	FOXP2	.((.(((((((((((((((.....&)))))))))))))....))..)).	4958	4982	1	-21.3	1	5.47094e-05	0.618	3.10293	3.04318	-6.82535	17	24	13	3UTR		0	0
hsa-miR-1291	NM_148921	EPN2	((((((((((((.(((..((((((&))))))))))))))..)).))))).	4565	4590	1	-23.3	1	0.000120215	0.471	1.44239	1.64845	-5.22671	21	25	14	3UTR		0	0
hsa-miR-1291	NM_148955	SNX1	.(.((((.((((((((.((((((.&)))))).........)))))))).)))).).	2694	2725	1	-25.7	1	7.08493e-05	0.426	-0.260566	-0.164894	-7.6645	19	31	8	3UTR		0	0
hsa-miR-1291	NM_152263	TPM3	.((((...((((((..(((((...&.)))))..)))))))))).	3100	3133	1	-25	1	5.40459e-07	0.456	0.059155	-0.19486	-10.5201	15	19	10	3UTR		0	0
hsa-miR-1291	NM_152267	RNF185	.(((((((((.((((.((..((((&))))..))))))))))))...))).	1717	1742	1	-23	1	0.00413254	0.441	0.100902	0.236882	-6.85115	19	25	12	3UTR		0	0
hsa-miR-1291	NM_152290	C1orf158	(((((((((((((.(.(((((((.&)))))))).))))..........))))))))).	2006	2039	1	-28.3	1	0.00116847	0.471	-0.144107	-0.0209074	-5.02746	21	33	9	3UTR		0	0
hsa-miR-1291	NM_152290	C1orf158	((((((((.((((...((((((.(&).))))))..)))))))).....)))).	1661	1689	1	-23.3	1	5.64741e-06	0.426	-0.475558	0.0963075	-6.8193	19	28	8	3UTR		0	0
hsa-miR-1291	NM_152319	C12orf54	...((((((((((((.........&)))))))))))).	565	578	1	-19.8	1	0.000164998	0.485	0.450782	0.314001	-6.74759	12	13	12	3UTR		0	0
hsa-miR-1291	NM_152320	ZNF641	.((((((....((((((((((...&))).)))))))..)))))).	2573	2593	1	-24.3	1	0.000688683	0.515	0.498294	0.388054	-11.2306	16	20	7	3UTR		0	0
hsa-miR-1291	NM_152342	CDYL2	.(((((((((((((((.((((((.&)))))))))))....))))..)))))).	2942	2970	1	-26.8	1	0.000633136	0.544	1.06181	1.0346	-3.79332	21	28	11	3UTR		0	0
hsa-miR-1291	NM_152365	KDF1	.(((((((.(.((((((((((...&))))))))..))...).))))))).	1545	1570	1	-29.3	1	8.01188e-05	0.382	1.36814	1.93523	-7.67449	18	25	8	3UTR		0	0
hsa-miR-1291	NM_152376	UBXN10	.((((((((((((..(((((((((&)))))))))....))))....)))))))).	2855	2885	1	-24.9	1	0.0395532	0.544	0.463868	0.241726	-5.38561	21	30	9	3UTR		0	0
hsa-miR-1291	NM_152381	XIRP2	..(((((.((((...(((((((..&)))))))..))))..))))).	11019	11040	1	-25.9	1	0.0240411	0.632	0.385598	0.827513	-10.1521	16	21	7	3UTR		0	0
hsa-miR-1291	NM_152386	SGPP2	(((.(((((((((((.((((((((&.))))..)))))))))))).))).))).	4360	4407	1	-27.1	1	0.000684784	0.456	1.67473	-0.30651	-7.20265	22	28	12	3UTR		0	0
hsa-miR-1291	NM_152388	TMEM237	(((((((..((((((.((((((((&)))))))))))).........))..))))))).	2917	2950	1	-27.4	1	0.00920317	0.5	1.69365	1.74581	-7.54065	21	33	12	3UTR		0	0
hsa-miR-1291	NM_152398	OCIAD2	..((((((((((((((...((((.&.)))))))))).......)))))))).	689	725	1	-22.6	1	0.000533559	0.515	0	0	-4.957	18	27	10	3UTR		0	0
hsa-miR-1291	NM_152415	VPS37A	(((((((((.(((((.((((....&))))..))))))))).))))).	1559	1581	1	-20.3	1	0.00109373	0.691	1.44832	1.36965	-5.41313	18	22	9	3UTR		0	0
hsa-miR-1291	NM_152470	RNF165	.(((((((.(((((((((((((((&)))))))).................)))))))))))))).	7314	7354	1	-31.1	1	4.32467e-05	0.368	0.712522	0.427657	-4.84971	22	40	14	3UTR		0	0
hsa-miR-1291	NM_152478	ZNF583	.((.((((((..(((.(((((...&))))))))..)).)))))).	4668	4688	1	-18.8	1	0.000888704	0.544	0.120629	-0.00534892	-13.23	16	20	8	3UTR		0	0
hsa-miR-1291	NM_152487	TLCD4	.(((.(((((((.(((((((....&.)))))))..))))))).))).	5358	5402	1	-23.8	1	0.000120408	0.691	0.411963	0.727213	-9.20149	17	22	7	3UTR		0	0
hsa-miR-1291	NM_152493	ZNF362	..((((((((((..(((((((((.&)))).))))))))))..))))).	1662	1685	1	-28.8	1	3.78783e-07	0.353	0.777059	1.74554	-7.10297	19	23	10	3UTR		0	0
hsa-miR-1291	NM_152499	CCDC24	.((((..(((...(((((((((((&)))))))))))))).)))).	1228	1248	1	-27.5	1	2.21092e-05	0.338	0.71708	-0.205885	-14.6987	18	20	14	3UTR		0	0
hsa-miR-1291	NM_152542	PPM1K	..((((((.(((.(((((.(((..&))).)))))))).)))).)).	3566	3587	1	-22.5	1	0.000169189	0.515	0.513397	0.65145	-7.30252	17	21	8	3UTR		0	0
hsa-miR-1291	NM_152551	SNRNP48	.((((..((((..((((((((...&.))))))))..)).))..)))).	3594	3629	1	-26.4	1	7.87099e-05	0.471	0.0927697	0.0589552	-11.8739	16	23	8	3UTR		0	0
hsa-miR-1291	NM_152553	RNF217	.((((((..((((...(((((...&))))).)))))))))).	7470	7487	1	-23	1	0.00518451	0.618	0.0374068	0.292012	-8.98869	15	17	10	3UTR		0	0
hsa-miR-1291	NM_152557	ZNF746	(((((((.((((....((((..((&.))..)))).)))).))))))).	2675	2720	1	-25.6	1	7.19721e-05	0.338	1.34784	0.487464	-9.36568	17	23	7	3UTR		0	0
hsa-miR-1291	NM_152558	IQCE	.(((((((........((((((((&))))))))))))))).	4981	4997	1	-27	1	1.20736e-06	0.309	-0.333814	-0.335849	-15.3783	15	16	15	3UTR		0	1
hsa-miR-1291	NM_152570	LINGO2	.(((((((..(((((.(((((((.&))))))))))))...))))))).	11925	11948	1	-27.8	1	4.81494e-06	0.544	4.71067	4.42715	-6.32527	19	23	12	3UTR		0	0
hsa-miR-1291	NM_152574	TTC39B	..((((((((((....(((((...&)))))....)))..))))))).	3006	3028	1	-23.7	1	0.0144495	0.544	1.59594	0.929193	-8.07147	15	22	7	3UTR		0	0
hsa-miR-1291	NM_152588	TMTC2	((.(((.(((.(((((.(((((((&))))))))))))...))).))).)).	3661	3687	1	-24.5	1	6.36647e-06	0.515	2.77264	0.853035	-9.86357	20	26	12	3UTR		0	0
hsa-miR-1291	NM_152596	EXD1	.(((((((....(((((((((...&)))))))))...................))))).)).	2762	2799	1	-22.7	1	0.00022384	0.603	0.0712024	0.328656	-12.2638	16	37	9	3UTR		0	0
hsa-miR-1291	NM_152618	BBS12	...(((((((.(((((((((....&))))))))))))...)))).	2737	2757	1	-21.2	1	0.000702855	0.647	0.249569	0.0823144	-9.33931	16	20	12	3UTR		0	0
hsa-miR-1291	NM_152653	UBE2E2	(((.(((((.(((((.(((((((.&))).)))))))))...)))))))).	2001	2026	1	-23.9	1	0.000502162	0.515	0.7632	0.415261	-8.44515	20	25	9	3UTR		0	0
hsa-miR-1291	NM_152671	PIKFYVE	.(((((..((((((.(((..((((&))))..))).))))))..))))).	1614	1638	1	-21.3	1	0.0115559	0.485	0.677015	0.806247	-8.3861	18	24	6	3UTR		0	0
hsa-miR-1291	NM_152686	DNAJC18	.((.((((.(((((((.((((((.&)))))).)))))))....)))).)).	2488	2514	1	-24.2	1	6.25987e-05	0.574	0.306974	0.188299	-7.88174	19	26	7	3UTR		0	0
hsa-miR-1291	NM_152707	SLC25A16	(((((((..((.....(((.((((&)))).))).....))..))))))).	5343	5368	1	-23.4	1	0.00584588	0.588	0.0351098	0.732709	-13.7689	16	25	7	3UTR		0	0
hsa-miR-1291	NM_152715	TBCEL	(((((((..(((((((........&))))))..)..))))))).	1884	1903	1	-21.2	1	3.42858e-05	0.5	-0.291363	-0.340316	-7.3076	14	19	7	3UTR		0	0
hsa-miR-1291	NM_152716	PATL1	.((((((..((((((((((.((..&.)))))))))))))))))).	2935	2965	1	-26.5	1	0.0054319	0.676	2.62277	3.66072	-7.16335	18	20	18	3UTR		0	0
hsa-miR-1291	NM_152736	ZSCAN26	(((((((((((((((((((((...&.))))))...)))))).........))))))))).	1728	1777	1	-28.6	1	0.000364711	0.574	0.284826	0.0347154	-3.93757	21	35	9	3UTR		0	0
hsa-miR-1291	NM_152748	ELAPOR2	...((((..(((((..((((.(((&)))))))..)))))..)))).	4431	4452	1	-24.8	1	0.00252391	0.574	3.49674	3.18388	-10.8531	16	21	7	3UTR		0	0
hsa-miR-1291	NM_152748	ELAPOR2	.((((((((((((((((.(((((.&)))))...))))).))).........)))))))).	2837	2872	1	-21.9	1	0.00136939	0.574	-0.694928	0.16534	-3.79332	21	35	8	3UTR		0	0
hsa-miR-1291	NM_152753	SCUBE3	(((((((((((((((.(((((...&)))).).)))..))))))))).))).	3856	3882	1	-24.8	1	5.05576e-05	0.426	1.45205	0.576511	-4.17062	20	26	9	3UTR		0	0
hsa-miR-1291	NM_152787	TAB3	.((((((((((((((((((.((((&)))))))).))).........)))))...)))))).	3590	3626	1	-26.1	1	0.00175082	0.647	2.03473	1.78178	-3.79332	22	36	8	3UTR		0	0
hsa-miR-1291	NM_152793	MTURN	.((((((.(.((.(((.((((.((&)).))))))))).).)))))).	4322	4344	1	-23.7	1	6.487e-05	0.544	0.087976	-0.0799341	-8.6386	18	22	9	3UTR		0	0
hsa-miR-1291	NM_152835	PDIK1L	..(((((((((((((...(((((.&.))))).)))))))))).))).	3326	3353	1	-20.9	1	0.00218831	0.662	1.02557	1.53577	-5.19005	18	22	10	3UTR		0	0
hsa-miR-1291	NM_152854	CD40	((((((((((((..((.(((((((&))))))).)))))).))))...............)))).	706	745	1	-24	1	0.0157591	0.441	2.18994	1.47483	-6.08354	21	39	7	3UTR		0	0
hsa-miR-1291	NM_152897	SNX21	.(((((.....((((.(((((((.&)))))))))))))))).	1263	1280	1	-23.1	1	7.27398e-05	0.515	-0.0275253	-0.0853051	-13.0074	16	17	16	3UTR		0	0
hsa-miR-1291	NM_152902	TIPRL	..((((((.(((....((((((((&))))))))......))).)))))).	2321	2346	1	-22.5	1	8.70247e-05	0.676	-0.12852	0.21015	-9.12786	17	25	8	3UTR		0	0
hsa-miR-1291	NM_152911	PAOX	((((((((((((((((((((.((.&.))))))))))))))...)))))))).	1668	1724	1	-31.3	1	5.22637e-05	0.529	0.195326	-0.443284	-3.93757	22	27	14	3UTR		0	1
hsa-miR-1291	NM_152913	TMEM130	(.((((((.(((.(((((((((((&))))))).......)))).))))))))).).	1461	1492	1	-25.6	1	0.000186132	0.471	-0.240643	-0.0748609	-7.44677	21	31	9	3UTR		0	0
hsa-miR-1291	NM_152924	ABHD2	...((((..(((((((((((((((&)))))))).))))))))))).	8149	8170	1	-26.6	1	4.52509e-06	0.485	1.50392	1.8398	-9.88456	19	21	11	3UTR		0	0
hsa-miR-1291	NM_152994	PPP1R21	(((((((((....((.((((((..&))))))))....)))))..)))).	2577	2601	1	-22.1	1	0.00321683	0.515	1.18257	0.852871	-12.8738	17	24	8	3UTR		0	0
hsa-miR-1291	NM_152999	STEAP2	((((((((...(((((((((((((&)))))).))..)))))))).))))).	5960	5986	1	-23.9	1	0.0010689	0.632	0.00653916	-0.0577218	-9.06125	21	26	8	3UTR		0	0
hsa-miR-1291	NM_153002	GPR156	((((((((..(..((((((((...&))))))))..)..))).))))).	3030	3053	1	-25.5	1	0.000258059	0.485	2.67691	4.68664	-10.8724	17	23	8	3UTR		0	0
hsa-miR-1291	NM_153002	GPR156	(((((((((((((((((((((((.&))))))))).........))))))).....))))))).	3840	3878	1	-23.7	1	7.60143e-05	0.544	2.02087	1.87418	-3.93757	23	38	9	3UTR		0	0
hsa-miR-1291	NM_153015	TMEM74	((((((((.((((..(((((((.(&).)))))))........)))).)))))))).	1751	1782	1	-23.8	1	0.00827929	0.618	0.167409	-0.0497229	-6.58625	20	31	8	3UTR		0	0
hsa-miR-1291	NM_153026	PRICKLE1	...(((((((((((((((((((((&))))))..))))))).))))....)))).	3081	3110	1	-25.9	1	6.72203e-05	0.515	3.25422	2.44266	-6.51454	21	29	7	3UTR		0	0
hsa-miR-1291	NM_153029	N4BP1	(((((((..((..((.((((((.(&).)))))))).)).....))))))).	4710	4736	1	-24.2	1	4.70653e-06	0.412	2.80459	4.3005	-12.1766	18	26	8	3UTR		0	0
hsa-miR-1291	NM_153033	KCTD7	.(((((((((((.((((.(((((.&.)))))..))))...............))))))))))).	2247	2299	1	-24.4	1	0.000373678	0.5	0.000134427	-0.0369087	-5.08246	20	39	11	3UTR		0	0
hsa-miR-1291	NM_153035	TCEANC2	.(((((((((((.((((((((.((&)))))))...)))))))).)))))).	1470	1496	1	-25.6	1	0.000828341	0.618	0.466441	1.32455	-5.08246	21	26	8	3UTR		0	0
hsa-miR-1291	NM_153042	KDM1B	.(((.....(((((((((.((((.&))))..)))))))))...))).	3080	3102	1	-23.9	1	0.000870962	0.603	0.549566	0.505177	-14.727	16	22	9	3UTR		0	0
hsa-miR-1291	NM_153050	MTMR3	(((((((.((((..(.((((((((&)))))))).)..))))..))))))).	4986	5012	1	-33.4	1	0.000225402	0.426	0.764807	0.265633	-8.63023	20	26	8	3UTR		0	0
hsa-miR-1291	NM_153050	MTMR3	...((((((((((((.((((.(((&.)))))))...)))))))))))).	6227	6279	1	-29.3	1	7.12979e-07	0.382	0.157077	-0.144157	-6.74759	19	24	12	3UTR		0	0
hsa-miR-1291	NM_153051	MTMR3	(((((((.((((..(.((((((((&)))))))).)..))))..))))))).	4959	4985	1	-33.4	1	0.000225402	0.426	0.361184	0.243392	-8.63023	20	26	8	3UTR		0	0
hsa-miR-1291	NM_153051	MTMR3	...((((((((((((.((((.(((&.)))))))...)))))))))))).	6200	6252	1	-29.3	1	7.12979e-07	0.382	0.436888	-0.16252	-6.74759	19	24	12	3UTR		0	0
hsa-miR-1291	NM_153216	POU5F2	.(((((((((((((((((((.(((&.))).))))).......))))).))))))))).	1604	1651	1	-27.5	1	0.000224091	0.5	-0.194649	-0.0532978	-3.79332	22	33	9	3UTR		0	0
hsa-miR-1291	NM_153237	TMEM252	((((((((((....((((((((..&))))))))))))))...)))).	943	965	1	-26.3	1	4.22893e-06	0.515	0.816278	2.04696	-12.2551	18	22	14	3UTR		0	0
hsa-miR-1291	NM_153257	ZNF461	(((.(((((((((((.((((((..&.)))))))))).))))))).))).	3661	3716	1	-29.4	1	0.00771563	0.5	1.24079	0.986441	-7.20265	20	24	10	3UTR		0	0
hsa-miR-1291	NM_153348	FBXW8	.((((((..(((((((..(((((.&)))))..)))))))..)))))).	3324	3347	1	-22.4	1	0.0331922	0.544	-0.04464	-0.238899	-7.16335	18	23	7	3UTR		0	0
hsa-miR-1291	NM_153369	MFSD4B	....((((((((..((((((((((&)))))).)))))))).)))).	14409	14430	1	-25	1	3.54408e-05	0.588	-0.0615184	-0.0352068	-11.6925	18	21	8	3UTR		0	0
hsa-miR-1291	NM_153371	LNX2	((((((((..((...(((((((((&)))))))))...)))))))))).	2426	2449	1	-31.7	1	0.00091061	0.559	4.73641	2.58336	-9.11789	19	23	10	3UTR		0	0
hsa-miR-1291	NM_153442	GPR26	.((((((.((((((.(((((((..&.))))))).)))))).)))..))).	8992	9026	1	-27.1	1	0.000377886	0.544	-0.634421	-0.0592169	-6.84241	19	25	7	3UTR		0	0
hsa-miR-1291	NM_153450	MED19	.(((((((.((((((((((.((((&))))))))))........))))..))))).)).	673	706	1	-21.1	1	0.00635237	0.471	2.85794	1.78532	-4.84971	21	33	10	3UTR		0	0
hsa-miR-1291	NM_153451	LTO1	((((((.....((((((((((...&))))))..)))))))))).	2318	2337	1	-24.5	1	2.15087e-06	0.471	3.25375	1.75039	-12.9186	16	19	10	3UTR		0	0
hsa-miR-1291	NM_153498	CAMK1D	.((((((((((((.((((((..((&.))..)))))).)))))))))))).	6492	6545	1	-31.7	1	1.19776e-05	0.441	0.183185	0.39308	-4.65016	20	25	12	3UTR		0	0
hsa-miR-1291	NM_153604	MYOCD	(((((((((.((..((((((((((&))).)))))))....))....))))).)))).	5580	5612	1	-23.8	1	0.00258441	0.574	0.985453	-0.0965716	-7.32605	21	32	7	3UTR		0	0
hsa-miR-1291	NM_153633	HOXC4	((((((((((((((...((((...&.)))))))))))..))).)))).	1475	1518	1	-22.5	1	0.00238331	0.574	1.61424	1.91599	-4.90607	18	23	11	3UTR		0	0
hsa-miR-1291	NM_153649	TPM3	(((((((((..(.((((((.((..&))))))))).))))))))).	2014	2034	1	-23.3	1	4.3578e-07	0.588	1.48636	2.05645	-9.29399	18	20	9	3UTR		0	0
hsa-miR-1291	NM_153707	SAXO1	.((((((.((...((((((((...&)))))))))).)))))).	1993	2011	1	-23.7	1	0.000419842	0.662	0.0322065	-0.0577427	-13.5677	16	18	10	3UTR		0	0
hsa-miR-1291	NM_153708	RTP1	((((((((((((((((((..(.((&.)).)..)))))))))...)))))).))).	1667	1722	1	-28.2	1	0.000396586	0.5	-0.185778	0.353661	-3.93757	21	30	9	3UTR		0	0
hsa-miR-1291	NM_153827	MINK1	.(((((((.((..((..(((((((&))))))).)).))))))))).	4576	4597	1	-26.9	1	3.16737e-06	0.382	1.95659	1.61116	-9.7187	18	21	9	3UTR	MIRT762291	0	0
hsa-miR-1291	NM_153837	ADGRG5	.((((((((.((..(((((((.((&)).)))))))..)).)))).)))).	3180	3205	1	-26	1	0.000551078	0.412	0.160108	0.0386357	-7.1818	19	25	7	3UTR		0	0
hsa-miR-1291	NM_153840	ADGRF1	..((((((((.((((((..((((.&))))..))))....)).)))))))).	4618	4644	1	-24	1	0.000496218	0.574	2.70787	1.33254	-7.78178	18	26	8	3UTR		0	0
hsa-miR-1291	NM_170663	MINK1	.(((((((.((..((..(((((((&))))))).)).))))))))).	4489	4510	1	-26.9	1	3.16737e-06	0.382	1.95659	1.61116	-9.7187	18	21	9	3UTR	MIRT762291	0	0
hsa-miR-1291	NM_170665	ATP2A2	.((((((..(((((...(((((((&)))))))..))))))))))).	5710	5731	1	-27.5	1	0.000129819	0.426	-0.583786	-0.47266	-8.13185	18	21	11	3UTR		0	0
hsa-miR-1291	NM_170712	RASSF1	.((((((((.(((.(((...((.(&.).))...))).))))))))))).	1594	1636	1	-23.7	1	0.00481326	0.456	0.227195	0.1935	-5.89267	17	24	11	3UTR		0	1
hsa-miR-1291	NM_170713	RASSF1	.((((((((.(((.(((...((.(&.).))...))).))))))))))).	1655	1697	1	-23.7	1	0.00481326	0.456	0.290055	-0.0675541	-5.89267	17	24	11	3UTR		0	1
hsa-miR-1291	NM_170714	RASSF1	.((((((((.(((.(((...((.(&.).))...))).))))))))))).	1777	1819	1	-23.7	1	0.00481326	0.456	1.48575	1.27648	-5.89267	17	24	11	3UTR		0	1
hsa-miR-1291	NM_170736	KCNJ15	(((((((.((((..((((.((((.&))))..))))))))))))))).	2632	2654	1	-23.8	1	2.14196e-07	0.515	-0.280087	-0.144007	-8.39718	19	22	15	3UTR		0	0
hsa-miR-1291	NM_170750	PSMD10	..(((((....((..(((((((((&))))))))).))...))).)).	509	531	1	-22	1	0.00616837	0.618	0.191227	0.148638	-13.9866	16	22	9	3UTR		0	0
hsa-miR-1291	NM_172016	TRIM39	(((((((..((....((((.(...&).)))).....))..))))))).	3122	3145	1	-24.8	1	0.0017785	0.485	0.472694	0.554611	-13.5358	14	23	7	3UTR		0	0
hsa-miR-1291	NM_172071	RC3H1	.((((((((((...(((((.((((&.))))))))).))))).))))).	8196	8226	1	-26.4	1	0.000302961	0.544	4.678	3.65649	-9.2861	19	23	9	3UTR		0	0
hsa-miR-1291	NM_172106	KCNQ2	.(((((((((((..((((((((((&)))..))).)))).....))))))))).)).	6860	6891	1	-27.8	1	0.000112219	0.382	1.25758	2.58074	-5.9393	21	31	9	3UTR		0	0
hsa-miR-1291	NM_172107	KCNQ2	.(((((((((((..((((((((((&)))..))).)))).....))))))))).)).	6914	6945	1	-27.8	1	0.000112219	0.382	0.804091	2.56099	-5.9393	21	31	9	3UTR		0	0
hsa-miR-1291	NM_172108	KCNQ2	.(((((((((((..((((((((((&)))..))).)))).....))))))))).)).	6821	6852	1	-27.8	1	0.000112219	0.382	1.72569	2.32181	-5.9393	21	31	9	3UTR		0	0
hsa-miR-1291	NM_172127	CAMK2D	.((((((((..((.((.(((.(((&))).))).)).)).)))))))).	3070	3093	1	-21.4	1	0.0526577	0.632	1.26838	0.541343	-8.71745	18	23	8	3UTR		0	0
hsa-miR-1291	NM_172128	CAMK2D	.((((((((..((.((.(((.(((&))).))).)).)).)))))))).	3026	3049	1	-21.4	1	0.0526577	0.632	-0.0368185	0.619858	-8.71745	18	23	8	3UTR		0	0
hsa-miR-1291	NM_172232	ABCA5	((((...(((((....((((((((&))))))))...))))))))).	6490	6511	1	-20.1	1	9.08859e-06	0.603	3.12442	4.12676	-14.6157	17	21	9	3UTR		0	0
hsa-miR-1291	NM_172349	NSD1	.(((((.(((.((((..(((((((&))))))))))).))).))))).	8261	8283	1	-26.7	1	0.000494819	0.412	0.374614	0.482381	-8.39483	19	22	11	3UTR		0	0
hsa-miR-1291	NM_172349	NSD1	((((((((...((((..((((...&))))..)))).)))))))).	11141	11161	1	-26.6	1	2.18679e-06	0.456	1.87689	1.36673	-9.29429	16	20	8	3UTR		0	0
hsa-miR-1291	NM_173065	IFNLR1	..(((.((((((((((((((((((&))))..........)))))))))..))))).))).	2015	2050	1	-25.5	1	0.00435248	0.471	-0.193838	-0.126235	-6.85796	21	35	9	3UTR		0	0
hsa-miR-1291	NM_173075	APBB2	.(((((((((((((((((((.(((&))).))))............)))))))))...........)))))).	7889	7936	1	-25.1	1	0.00130507	0.574	2.97084	3.4202	-3.79332	22	47	9	3UTR		0	0
hsa-miR-1291	NM_173078	SLITRK4	((.(((((.(((..((((((((((&))))))))))..)))...))))..).)).	8364	8393	1	-22.9	1	3.34646e-05	0.515	1.98388	1.87742	-8.69747	20	29	10	3UTR		0	0
hsa-miR-1291	NM_173079	RUNDC1	.(((....((((((((((((....&))))))))))))......))).	3393	3415	1	-22.8	1	0.0173458	0.588	-0.067329	0.106475	-13.6706	15	22	12	3UTR		0	0
hsa-miR-1291	NM_173084	TRIM59	.(((((.((.((.((((((((...&))))))))))....)).))))).	2168	2191	1	-22.4	1	1.7849e-05	0.471	-0.175564	-0.0144544	-7.86865	17	23	10	3UTR		0	0
hsa-miR-1291	NM_173163	NFATC3	(((((((((((((((....((((.&))))...)))))).)).))))))).	3704	3729	1	-27.2	1	1.48431e-05	0.426	1.91359	1.30374	-4.17062	19	25	7	3UTR		0	1
hsa-miR-1291	NM_173165	NFATC3	(((((((((((((((....((((.&))))...)))))).)).))))))).	3615	3640	1	-27.2	1	1.48431e-05	0.426	1.91359	1.30374	-4.17062	19	25	7	3UTR		0	1
hsa-miR-1291	NM_173167	UNC45B	((((((..((((.....(((((((&)))))))))))..)))))).	4271	4291	1	-24.2	1	2.73912e-05	0.515	0.045946	-0.117437	-10.9094	17	20	11	3UTR		0	1
hsa-miR-1291	NM_173179	SLC35C2	(((((((........((((((((.&))))))))))))))).	5817	5833	1	-25	1	0.000242524	0.412	-0.785997	-0.197297	-17.6031	15	16	15	3UTR		0	0
hsa-miR-1291	NM_173207	TGIF1	((((((((..((((((((.((((.&))))..)))....))))))))))).)).	2546	2574	1	-20.5	1	0.000114479	0.426	-0.501872	-0.220217	-6.23647	20	28	11	3UTR		0	0
hsa-miR-1291	NM_173210	TGIF1	((((((((..((((((((.((((.&))))..)))....))))))))))).)).	2473	2501	1	-20.5	1	0.000114479	0.426	-0.501872	-0.220217	-6.23647	20	28	11	3UTR		0	0
hsa-miR-1291	NM_173211	TGIF1	((((((((..((((((((.((((.&))))..)))....))))))))))).)).	2373	2401	1	-20.5	1	0.000114479	0.426	-0.501872	-0.220217	-6.23647	20	28	11	3UTR		0	0
hsa-miR-1291	NM_173216	ST6GAL1	..((((.(.((((.(((((((...&))))))).)))).).)))).	2425	2445	1	-24.5	1	0.000107191	0.5	0.547732	-0.142413	-8.41392	16	20	7	3UTR		0	0
hsa-miR-1291	NM_173217	ST6GAL1	..((((.(.((((.(((((((...&))))))).)))).).)))).	1768	1788	1	-24.5	1	0.000107191	0.5	0.547732	-0.142413	-8.41392	16	20	7	3UTR		0	0
hsa-miR-1291	NM_173359	EIF4E3	.(((((...(((((((((((((..&))))))))..)))))...))))).	871	895	1	-24	1	0.00389936	0.5	-0.17324	-0.0246031	-8.70704	18	24	8	3UTR		0	0
hsa-miR-1291	NM_173468	MOB1B	.....(((((((((((((.((((.&)))).))))))))..))))).	5882	5903	1	-21.4	1	0.000612875	0.706	0.0275063	0.0188818	-13.6656	17	21	8	3UTR		0	0
hsa-miR-1291	NM_173487	C4orf33	((..(((((((((.(((.(((...&))).)))..)))))))))..)).	2528	2551	1	-22.6	1	0.00335993	0.662	0.407322	0.20314	-9.38398	17	23	9	3UTR		0	0
hsa-miR-1291	NM_173495	PTCHD1	(((((((((((((((((..((((.&))))..............)))))))))))).............................))))).	6089	6154	1	-24.6	1	0.00221683	0.559	0.770223	0.423134	-3.93757	21	65	12	3UTR		0	0
hsa-miR-1291	NM_173496	MPP7	.((((.(..(((.((((((((((.&)))))))))))))..).)))).	2451	2473	1	-28.9	1	8.23374e-05	0.471	0.108727	0.176819	-10.3534	18	22	13	3UTR		0	0
hsa-miR-1291	NM_173505	ANKRD29	.(((.(((((((((((((((.(((&)))))))))))))))))).))).	2329	2352	1	-31.1	1	0.000554057	0.662	2.33737	2.00603	-7.91236	21	23	18	3UTR		0	0
hsa-miR-1291	NM_173511	FAM117B	((((((.(((((((((.((((...&))))))))))).)).))).))).	2521	2544	1	-23.5	1	0.00149054	0.559	1.90705	1.70037	-5.48126	19	23	11	3UTR		0	0
hsa-miR-1291	NM_173518	MCMDC2	.((((((((.(.(((((((((.((&))...))))))))).)..........)))))......))).	3452	3493	1	-21.2	1	7.57235e-05	0.441	0.0915041	-0.0821181	-8.38263	20	41	9	3UTR		0	0
hsa-miR-1291	NM_173535	CLEC4F	...(((...(((((((.((((((.&))))))))))))).....))).	2024	2046	1	-21.6	1	0.00127741	0.544	1.40392	0.420515	-11.4283	16	22	13	3UTR		0	0
hsa-miR-1291	NM_173551	ANKS6	.((((((((((.(...((((..((&)).))))...).)))))))))).	5639	5662	1	-26.9	1	9.41525e-07	0.382	2.13222	2.60965	-8.96547	17	23	10	3UTR		0	0
hsa-miR-1291	NM_173551	ANKS6	...(((((((((....(((((((.&))))))).....))).)))))).	6149	6172	1	-26.7	1	0.0077078	0.441	2.98301	4.36636	-9.62901	16	23	7	3UTR		0	0
hsa-miR-1291	NM_173566	PRR14L	.(((((((.(((((((((..(((.&)))....))))))))))).))))).	9889	9914	1	-25.2	1	2.95178e-05	0.471	2.12206	1.26394	-4.84971	19	25	11	3UTR		0	0
hsa-miR-1291	NM_173569	UBN2	(((((((((((((((....(((((&)))))..))))))))))))))).	10939	10962	1	-27	1	5.21051e-05	0.574	0.165916	0.100427	-4.17062	20	23	15	3UTR		0	0
hsa-miR-1291	NM_173570	ZDHHC23	.(((((.((((..((((..(((((&)))))...)))).))))))))).	3085	3108	1	-23.4	1	0.000113704	0.529	0.252911	0.00131143	-9.97295	18	23	9	3UTR		0	0
hsa-miR-1291	NM_173593	B4GALNT3	.(((((..((((.(((((.(((((&)))))..)))))...))))))))).	4923	4948	1	-24.8	1	2.56746e-05	0.368	-0.3906	-0.204675	-8.93978	19	25	9	3UTR		0	0
hsa-miR-1291	NM_173598	KSR2	.(((((.(((((((...((((((.&))))))))))))).))))).	11867	11887	1	-28.4	1	0.00110107	0.529	-0.565324	-0.169614	-6.30551	18	20	13	3UTR		0	0
hsa-miR-1291	NM_173601	GXYLT1	((.(((((((((((.....((((.&))))..))))))))))).)).	3004	3025	1	-25.3	1	0.00216392	0.529	0.314008	0.610332	-6.46361	17	21	11	3UTR		0	0
hsa-miR-1291	NM_173625	C17orf78	((.(((((.(((((((........&)))))))))))).)).	1025	1041	1	-20	1	0.0104829	0.618	0.791449	0.113742	-6.5515	14	16	12	3UTR		0	0
hsa-miR-1291	NM_173627	ENDOV	...(((.((((.((((((((....&)))))))).))))...))).	1605	1625	1	-24.4	1	0.000682303	0.618	-0.00695338	-0.0735139	-11.405	15	20	8	3UTR		0	0
hsa-miR-1291	NM_173642	RIMKLA	.(((((((.((.....((((((((&)))))))))).))))))).	7399	7418	1	-26.7	1	3.52574e-06	0.412	0.268772	0.772289	-11.311	17	19	10	3UTR		0	0
hsa-miR-1291	NM_173793	C22orf39	((((((((..((..(((((.((((&)))).))))).)))))))))).	3457	3479	1	-25.3	1	0.000121018	0.574	1.99355	2.25857	-8.38244	19	22	10	3UTR		0	0
hsa-miR-1291	NM_173809	BLOC1S2	((..((((..(((.((((((((..&)))))))).)))))))..)).	559	580	1	-24.3	1	0.00235537	0.574	-0.0182321	0.0258245	-11.6829	17	21	8	3UTR		0	0
hsa-miR-1291	NM_173809	BLOC1S2	.((((.....(.(((((((((...&))))))))).)...)))).	1843	1862	1	-23.8	1	2.2505e-05	0.485	1.08611	0.754076	-15.1973	14	19	9	3UTR		0	0
hsa-miR-1291	NM_173815	CES4A	(((.((((((((.....(((((((&))))))).....))))))))))).	1888	1912	1	-23.9	1	0.000115555	0.456	0.0106358	0.0373218	-10.0841	18	24	11	3UTR		0	0
hsa-miR-1291	NM_173851	SLC30A8	(((((((.(((((((.(((((((.&)))).))))))..)))).).).))))).	5272	5300	1	-24.1	1	0.00911447	0.5	0.646945	1.32397	-6.48426	21	28	6	3UTR		0	0
hsa-miR-1291	NM_173855	MORN3	..(((((((.(((((((((((((.&))))))))))..))).)).......))))).	2401	2432	1	-23.9	1	0.00356011	0.529	0.225061	-0.310469	-6.19951	20	31	10	3UTR		0	0
hsa-miR-1291	NM_174886	TGIF1	((((((((..((((((((.((((.&))))..)))....))))))))))).)).	2609	2637	1	-20.5	1	0.000114479	0.426	-0.501872	-0.220217	-6.23647	20	28	11	3UTR		0	0
hsa-miR-1291	NM_174891	CLBA1	..(((((((((....(((((((((&.))))))).))))))))))).	2084	2112	1	-29.5	1	4.55258e-05	0.412	-0.155425	-0.539907	-11.1852	18	21	11	3UTR		0	0
hsa-miR-1291	NM_174899	FBXO36	.(((((((((.(((((((((.(((&))))))).))))))))...................)))))).	1899	1941	1	-21.2	1	0.000246724	0.544	0.0176615	-0.377589	-6.6181	21	42	8	3UTR		0	0
hsa-miR-1291	NM_174913	NOP9	((((((((((((..(((((((((.&))))...)))))..)))..))))))))).	3196	3225	1	-27.7	1	3.59222e-05	0.441	0	0	-6.08354	21	29	9	3UTR		0	0
hsa-miR-1291	NM_174920	SAMD14	.((((((((..(.(((((......&)))))..)..)))))))).	2705	2724	1	-25.4	1	8.37609e-05	0.426	0.837944	0.398488	-9.14974	14	19	8	3UTR		0	1
hsa-miR-1291	NM_174926	TLCD5	.(((((((..((((((((..((..&))..))))))))...))))))).	2567	2590	1	-23	1	0.000622106	0.721	0.237419	-0.0890671	-6.09222	17	23	8	3UTR		0	0
hsa-miR-1291	NM_174929	ZMIZ2	.((((((((.....(.(((((((.&)))))))))))))))).	3720	3737	1	-25	1	8.76348e-07	0.294	0.415125	0.29285	-13.5864	16	17	16	3UTR		0	0
hsa-miR-1291	NM_174937	TCERG1L	...((((((.((((((((.(((((&)))))..))))))))...)))).)).	1970	1996	1	-25.8	1	0.000172262	0.485	2.13811	2.72155	-7.75705	19	26	8	3UTR		0	0
hsa-miR-1291	NM_175056	ZPLD1	.((((..(.((((((..(((((((&))))))))))))))....)))).	3247	3270	1	-22.7	1	0.0101972	0.632	-0.139974	0.569102	-8.52741	18	23	14	3UTR		0	0
hsa-miR-1291	NM_175066	DDX51	.((((((((((....((((((...&))))))...)))))))))).	3401	3421	1	-26	1	0.00323641	0.324	4.0688	3.09972	-10.0215	16	20	10	3UTR		0	0
hsa-miR-1291	NM_175709	CBX7	((.((((((((.....((((....&))))....)))))))).)).	3896	3916	1	-23.3	1	0.000116752	0.485	1.44672	1.61863	-11.9564	14	20	8	3UTR		0	0
hsa-miR-1291	NM_175719	TPO	((((((((...((((.((((.(((&.))).))))))))...)))))))).	3139	3191	1	-29.3	1	3.58499e-06	0.397	0	0	-9.29429	19	25	8	3UTR		0	0
hsa-miR-1291	NM_175723	SSX5	((((..((((((((((........&))).)))))))..)))).	1253	1271	1	-18	1	0.113852	0.541	0	0	-9.95757	14	18	7	3UTR		0	0
hsa-miR-1291	NM_175769	TCF23	.(((((((((((....(((((.((&))..)))))...))))))))))).	2317	2341	1	-24.2	1	0.000119853	0.412	-0.843463	-0.263115	-6.90779	18	24	11	3UTR		0	0
hsa-miR-1291	NM_175854	PAN3	((..(((((((((((..(((((((&)))))).)..)))))))))))..)).	2895	2921	1	-28.7	1	0.00127493	0.574	4.21857	2.39617	-8.76019	20	26	11	3UTR		0	0
hsa-miR-1291	NM_175861	TMTC1	..(((((..(((..(((((((((.&)))))))))..)))..))))).	8078	8100	1	-27.7	1	0.00164928	0.544	2.56694	3.35558	-10.473	17	22	9	3UTR		0	0
hsa-miR-1291	NM_175862	CD86	((((((((.(((..(.(((((...&)))))).)))..)))))))).	2347	2368	1	-23.5	1	3.34542e-06	0.5	-0.593028	-0.00745721	-7.37298	17	21	8	3UTR		0	0
hsa-miR-1291	NM_175902	OGFOD3	..((((((((((..(((((.((((&))))))))).)))))))))).	3368	3389	1	-28.8	1	7.60726e-06	0.426	-0.491775	-0.143284	-7.10297	19	21	10	3UTR		0	0
hsa-miR-1291	NM_175907	ZADH2	.(((((.((.((.((((((((...&))))))))))...))..))))).	6911	6934	1	-25.2	1	0.00496608	0.426	3.28044	3.79244	-7.86865	17	23	10	3UTR		0	0
hsa-miR-1291	NM_176787	PIGN	..((((((((((((((((((..((&.)).))))))))......)))))))))).	3660	3718	1	-25.9	1	0.0194987	0.647	0.628177	0.548909	-4.957	20	29	10	3UTR		0	0
hsa-miR-1291	NM_176816	CCDC125	..((((((((.((((.(((.....&)))))))..)))))))).	2901	2919	1	-23.6	1	0.000113266	0.515	0.736063	1.74786	-8.01482	15	18	8	3UTR		0	0
hsa-miR-1291	NM_176871	PDLIM2	.(((((.((.(..((((((((...&))))))))..)...))))))).	2587	2609	1	-25.8	1	4.84245e-05	0.412	-0.11142	-0.0384974	-11.2155	16	22	8	3UTR		0	0
hsa-miR-1291	NM_176892	CD86	((((((((.(((..(.(((((...&)))))).)))..)))))))).	2323	2344	1	-23.5	1	3.34542e-06	0.5	0.381728	0.0118945	-7.37298	17	21	8	3UTR		0	0
hsa-miR-1291	NM_177401	MIDN	.(.(((((((((((((((((((((&)))))))))))...................)))))..........))))).).	3004	3057	1	-27.4	1	7.61385e-08	0.353	1.19681	0.285049	-5.35086	22	53	11	3UTR		0	0
hsa-miR-1291	NM_177402	SYT2	.((((((((.(((((.....((((&))))....)))))...)))))))).	7387	7412	1	-24.8	1	2.05233e-05	0.441	2.92649	1.1654	-5.26888	17	25	8	3UTR		0	1
hsa-miR-1291	NM_177422	AGO3	.(((((((((((((((((((((((&)))))).........).)))))))))...........................))))))).	13987	14048	1	-24.3	1	0.00509909	0.588	0.26709	0.201342	-3.79332	23	61	9	3UTR		0	0
hsa-miR-1291	NM_177526	PLPP2	..(((((((((((((((((.((..&)))))))))))))....)))))).	1201	1225	1	-23.6	1	0.027242	0.712	0.0185486	0.230916	-4.957	19	24	13	3UTR		0	0
hsa-miR-1291	NM_177538	CYP20A1	((((..((((((.((.(((((...&)))))..)).))))))...)))).	9856	9880	1	-24.3	1	0.48229	0.5	0.0090155	0.0492675	-11.4798	17	24	6	3UTR		0	0
hsa-miR-1291	NM_177559	CSNK2A1	(((((((.((((((((((((((((&))).)))))))...........................))))))))))))).	2041	2093	1	-27	1	2.0412e-05	0.559	0.387344	0.747339	-6.25121	23	52	13	3UTR		0	0
hsa-miR-1291	NM_177559	CSNK2A1	.(((((((...((((((..((...&))..)))))).))))))).	4780	4799	1	-26.2	1	4.84007e-06	0.588	0.33048	-0.0126638	-8.917	15	19	7	3UTR		0	0
hsa-miR-1291	NM_177560	CSNK2A1	(((((((.((((((((((((((((&))).)))))))...........................))))))))))))).	1714	1766	1	-27	1	2.0412e-05	0.559	0.134292	0.152488	-6.25121	23	52	13	3UTR		0	0
hsa-miR-1291	NM_177560	CSNK2A1	.(((((((...((((((..((...&))..)))))).))))))).	4453	4472	1	-26.2	1	4.84007e-06	0.588	0.311443	0.131423	-8.917	15	19	7	3UTR		0	0
hsa-miR-1291	NM_177925	H2AJ	(((((((((((((((.((.(((((&))))).).).))))))))).)))))).	1213	1240	1	-23.3	1	0.00236307	0.618	0.536285	0.254213	-4.17062	22	27	9	3UTR		0	0
hsa-miR-1291	NM_177937	GOLM1	.(((((((.(((..(.((((((.(&.).)))))))..)))))))))).	1618	1656	1	-26.2	1	2.57014e-05	0.574	0.473858	0.350293	-7.22873	18	23	10	3UTR		0	0
hsa-miR-1291	NM_177964	LYPD6B	.(((((((.(((((..(((.....&)))...)))))))))))).	976	995	1	-22.9	1	9.11511e-06	0.441	0.00853427	-0.00770458	-5.81821	15	19	12	3UTR		0	0
hsa-miR-1291	NM_177972	TUB	.(((((((((((.((..((.(((.&)))..))..)).))))))))))).	5506	5530	1	-28	1	8.13158e-09	0.426	0.0826624	0.0900208	-5.3155	18	24	11	3UTR		0	0
hsa-miR-1291	NM_177977	HAP1	.((((((((((..((.(((((...&.))))).))...)))))))))).	2048	2085	1	-28.7	1	0.000183073	0.324	1.30512	0.594399	-8.66231	17	23	10	3UTR		0	1
hsa-miR-1291	NM_177996	EPB41L1	.(((((((((((...(((((....&))))).....))))))))))).	3788	3810	1	-30.1	1	5.81946e-06	0.382	0.664122	0.316498	-6.67474	16	22	11	3UTR		0	1
hsa-miR-1291	NM_178151	DCX	(((.((((.((....((((((...&))))))....)))))).))).	3555	3576	1	-23.2	1	0.00169932	0.529	-0.0265518	-0.0317516	-14.2542	15	21	6	3UTR		0	0
hsa-miR-1291	NM_178152	DCX	(((.((((.((....((((((...&))))))....)))))).))).	3402	3423	1	-23.2	1	0.00169932	0.529	-0.320976	-0.0342547	-14.2542	15	21	6	3UTR		0	0
hsa-miR-1291	NM_178169	RASSF3	((.(((((((((((((((((....&.)))).))))))))))))).)).	1464	1492	1	-25.8	1	0.00120685	0.515	-0.361605	0.308817	-5.49511	19	23	13	3UTR		0	0
hsa-miR-1291	NM_178191	ATP5IF1	((((((..(((((((.((((....&)))).))).)))))))))).	1185	1205	1	-21.6	1	0.000131159	0.559	-0.0185323	0.00625493	-8.02794	17	20	10	3UTR		0	0
hsa-miR-1291	NM_178570	RTN4RL2	(((((((((((((...........&.))))))))))))).	2013	2031	1	-27.5	1	9.22742e-06	0.353	-0.103233	0.221247	-5.76291	13	15	13	3UTR		0	1
hsa-miR-1291	NM_178818	CMTM4	(((((((((....(..(((.((((&)))).)))..)))))))))).	1178	1199	1	-22.9	1	0.0024673	0.544	0.299643	0.348697	-13.6093	17	21	10	3UTR		0	0
hsa-miR-1291	NM_178842	CERS3	.((((((..((((((((((((((.&))))))))))))................))..)))..))).	2418	2459	1	-23.5	1	0.0016631	0.471	0.518687	1.26392	-7.16335	20	41	12	3UTR		0	0
hsa-miR-1291	NM_180991	SLCO4C1	(((((((((((((...........&)))))).))))))).	4402	4417	1	-21	1	0.0284213	0.706	0.60201	2.12889	-5.76291	13	15	7	3UTR		0	0
hsa-miR-1291	NM_181077	GOLGA8A	((.(((((((((((((........&))))))))))))).)).	3399	3416	1	-22.4	1	0.00147787	0.632	0.772953	0.476998	-5.49511	15	17	13	3UTR	MIRT476174	0	0
hsa-miR-1291	NM_181336	LEMD2	.((((((((((((((.((......&))))))))..)))))))).	2885	2904	1	-25.8	1	7.75492e-05	0.632	1.43761	0.766055	-4.02637	16	19	8	3UTR		0	0
hsa-miR-1291	NM_181357	DCAF11	((((((((((((((((((.((((.&))))..)))))))).))).))).........)))).	2094	2130	1	-25.9	1	0.0104393	0.441	0	0	-3.93757	22	36	8	3UTR		0	0
hsa-miR-1291	NM_181449	CD300E	...((((((((...(.(((((.((&))...))))))..)))))))).	2378	2400	1	-22.7	1	0.000403866	0.529	0.0549391	-0.00433516	-12.2404	16	22	8	3UTR		0	0
hsa-miR-1291	NM_181472	CMTM7	..((((((((((..(.((((((((&)))))))))))).))))))).	1711	1732	1	-29.7	1	2.91195e-06	0.406	-0.147904	-0.0825705	-7.33602	19	21	12	3UTR		0	0
hsa-miR-1291	NM_181491	MED22	((((((..(((((((((((((((.&)))))))))))..)))))).)))).	753	778	1	-28.7	1	1.36513e-05	0.471	4.15232	2.30834	-7.7949	21	25	11	3UTR		0	1
hsa-miR-1291	NM_181504	PIK3R1	(((((.((((.((((((((((...&))))))))))................)))).))))).	5448	5485	1	-23.4	1	0.0101304	0.515	3.33583	2.9169	-8.66331	19	37	10	3UTR		0	0
hsa-miR-1291	NM_181504	PIK3R1	.(..(((.((((((.((((((...&))))))...)))))))))..).	3346	3368	1	-21.6	1	5.65691e-05	0.618	-0.000110667	-0.0370073	-11.432	16	22	9	3UTR		0	0
hsa-miR-1291	NM_181521	CMTM4	(((((((((((...((((..((((&))))..))))..))))))))))).	2424	2448	1	-26.8	1	0.0124336	0.412	0.145548	-0.0685591	-9.43035	19	24	11	3UTR		0	0
hsa-miR-1291	NM_181523	PIK3R1	(((((.((((.((((((((((...&))))))))))................)))).))))).	6773	6810	1	-23.4	1	0.0101304	0.515	3.33583	2.9169	-8.66331	19	37	10	3UTR		0	0
hsa-miR-1291	NM_181524	PIK3R1	(((((.((((.((((((((((...&))))))))))................)))).))))).	5510	5547	1	-23.4	1	0.0101304	0.515	3.33583	2.9169	-8.66331	19	37	10	3UTR		0	0
hsa-miR-1291	NM_181661	VPS13B	..(((((((..(((((.(((....&))))))))))))))).	1494	1510	1	-19.2	1	0.000438562	0.647	0.502981	-0.136819	-9.02428	15	16	15	3UTR		0	0
hsa-miR-1291	NM_181675	PPP2R2B	...((((((((.......((((((&))))))......)))))))).	9013	9034	1	-22.3	1	0.00260135	0.5	1.38162	1.03825	-12.9758	14	21	8	3UTR		0	0
hsa-miR-1291	NM_181713	UBXN2A	.(((((((((((((((.(((....&)))))))))))).................)))))).	5429	5465	1	-22.4	1	0.0117643	0.662	-0.166817	-0.161972	-3.79332	18	36	12	3UTR		0	0
hsa-miR-1291	NM_181784	SPRED2	.(((((..((((((((.(((((((&))))))).))))))))))))).	2239	2261	1	-25.4	1	0.00814353	0.559	0.309032	0.577756	-7.65065	20	22	13	3UTR		0	0
hsa-miR-1291	NM_181786	ZNF875	(((((((((((.....(((((((.&)))))).)..)))))))).))).	2860	2883	1	-24.2	1	3.61791e-06	0.382	0.0556051	0.0661203	-10.3988	18	23	8	3UTR		0	0
hsa-miR-1291	NM_181789	GLDN	.((((((((.(.(((((((((...&))))))))).)..))..)))))).	2393	2417	1	-26.4	1	2.87216e-05	0.441	0.0796667	-0.00120259	-8.38263	18	24	9	3UTR		0	0
hsa-miR-1291	NM_181828	NF2	..((((((.(((....(((.((((&)))).)))....))).)))))).	2667	2690	1	-25.1	1	3.8222e-05	0.353	0.267855	0.0666757	-9.12786	16	23	6	3UTR		0	1
hsa-miR-1291	NM_181829	NF2	..((((((.(((....(((.((((&)))).)))....))).)))))).	2670	2693	1	-25.1	1	3.8222e-05	0.353	0.267855	0.0666757	-9.12786	16	23	6	3UTR		0	1
hsa-miR-1291	NM_181830	NF2	..((((((.(((....(((.((((&)))).)))....))).)))))).	2544	2567	1	-25.1	1	3.8222e-05	0.353	0.267855	0.0666757	-9.12786	16	23	6	3UTR		0	1
hsa-miR-1291	NM_181832	NF2	..((((((.(((....(((.((((&)))).)))....))).)))))).	2808	2831	1	-25.1	1	3.8222e-05	0.353	0.267855	0.0666757	-9.12786	16	23	6	3UTR		0	1
hsa-miR-1291	NM_181877	ZSCAN2	..((((((...(((.((.((((((&)))))).)).))))))))).	2537	2557	1	-22.6	1	0.000520699	0.485	0.00208243	-0.276516	-10.8161	17	20	9	3UTR		0	0
hsa-miR-1291	NM_181888	UBE2D3	..((((...(((.((((((..(((&)))..))))))))))))).	3485	3504	1	-20.1	1	0.000996514	0.647	1.47152	2.19309	-11.1598	16	19	13	3UTR		0	0
hsa-miR-1291	NM_181890	UBE2D3	..((((...(((.((((((..(((&)))..))))))))))))).	3452	3471	1	-20.1	1	0.000996514	0.647	2.93234	3.68386	-11.1598	16	19	13	3UTR		0	0
hsa-miR-1291	NM_182503	ADAT2	((((((((((((..((((......&))))))))).)))).))).	3504	3523	1	-23.8	1	0.000693099	0.529	-0.258082	-0.43965	-6.08354	16	19	9	3UTR		0	0
hsa-miR-1291	NM_182503	ADAT2	.(((((..((((.(((((.(((((&))))).)))))))))....................))))).	5652	5693	1	-22.8	1	0.00274409	0.632	3.05231	2.78799	-8.93978	19	41	9	3UTR		0	0
hsa-miR-1291	NM_182503	ADAT2	.((.(((((((((((.........&))))))))))).)).	5138	5153	1	-22.7	1	0.0023948	0.5	0.189985	0.130982	-7.0584	13	15	11	3UTR		0	0
hsa-miR-1291	NM_182511	CBLN2	.(((((((((((..((((.(((((&))))).)))).))))))))))).	1627	1650	1	-34.6	1	1.93388e-05	0.412	6.14037	5.03847	-5.9393	20	23	11	3UTR		0	0
hsa-miR-1291	NM_182523	CMC1	((.(((((..((((((((......&))))))))..........))))).)).	5291	5318	1	-21.8	1	0.000257403	0.559	3.1509	1.3542	-7.79401	15	27	8	3UTR		0	0
hsa-miR-1291	NM_182523	CMC1	....(((((((((((.(((((...&)))))))))))...))))).	4272	4292	1	-22.5	1	0.00663252	0.603	0.0267303	0.238191	-9.77961	16	20	11	3UTR		0	0
hsa-miR-1291	NM_182527	CABP7	((.((((((((((...(((.....&)))...)))))))))).)).	2700	2720	1	-26.7	1	0.000435767	0.353	-0.358958	0.636647	-7.32045	15	20	10	3UTR		0	1
hsa-miR-1291	NM_182547	TMED4	.(((((.((((...(((((((((.&)))))))))))))..))))).	1099	1120	1	-25.5	1	0.000498825	0.515	1.39062	1.28382	-10.8298	18	21	13	3UTR		0	0
hsa-miR-1291	NM_182547	TMED4	.(((((((...((.((..(((((.&)))))..)).))...))))))).	1699	1722	1	-23.9	1	0.00538912	0.515	4.82603	5.82328	-9.77384	16	23	7	3UTR		0	0
hsa-miR-1291	NM_182587	UNC80	.((((((((((..(((.((.((((&)))).)).))))))))))))).	12821	12843	1	-28	1	0.00176287	0.485	0.433389	0.424688	-8.42926	19	22	13	3UTR		0	0
hsa-miR-1291	NM_182597	LSMEM1	.(((((((((((...((((((((.&))))))))..............)))))....)))))).	1309	1347	1	-22.6	1	0.00554501	0.588	0.00741694	0.000908422	-6.67474	19	38	8	3UTR		0	0
hsa-miR-1291	NM_182620	SKA2	...((((((((((((((((.....&))))).....))))))))))).	2342	2364	1	-22.1	1	0.000309425	0.721	0.528551	0.325792	-6.51454	16	22	11	3UTR		0	0
hsa-miR-1291	NM_182729	TXNRD1	..((((((.(((((...((((...&))))...))))))))))).	1933	1952	1	-22.7	1	0.000450324	0.471	1.97663	1.92765	-6.98189	15	19	11	3UTR		0	0
hsa-miR-1291	NM_182742	TXNRD1	..((((((.(((((...((((...&))))...))))))))))).	2060	2079	1	-22.7	1	0.000450324	0.471	1.97663	1.92765	-6.98189	15	19	11	3UTR		0	0
hsa-miR-1291	NM_182743	TXNRD1	..((((((.(((((...((((...&))))...))))))))))).	1823	1842	1	-22.7	1	0.000450324	0.471	1.97663	1.92765	-6.98189	15	19	11	3UTR		0	0
hsa-miR-1291	NM_182744	NBL1	.(((((((((((....(((((((.&)))).))).))))))))))).	1734	1755	1	-24.6	1	3.21557e-05	0.441	-0.107044	-0.463421	-6.90779	18	21	11	3UTR		0	0
hsa-miR-1291	NM_182757	RNF144B	.((((((.(.((((((((.(((((&)))))...).)))))))..).)))))).	3384	3412	1	-24.1	1	0.0272759	0.618	0.321617	-0.00931405	-7.34947	20	28	7	3UTR		0	0
hsa-miR-1291	NM_182802	MCM8	.(((((((..((.((((((((...&.)))))))))).....))))))).	6321	6350	1	-27.4	1	9.44099e-05	0.471	0.187708	0.0360218	-7.38135	17	24	10	3UTR		0	0
hsa-miR-1291	NM_182898	CREB5	.((((((((..(((.(..((((((&)))).))...).)))...)))))))).	4812	4839	1	-21.6	1	0.00105785	0.632	1.53221	2.06808	-8.59606	18	27	8	3UTR		0	0
hsa-miR-1291	NM_182899	CREB5	.((((((((..(((.(..((((((&)))).))...).)))...)))))))).	4461	4488	1	-21.6	1	0.00105785	0.632	1.53221	2.06808	-8.59606	18	27	8	3UTR		0	0
hsa-miR-1291	NM_182918	ERG	.((((((((.(((((((((((((.&)))..))))...))))))........)))))))).	3685	3720	1	-23.3	1	0.00202803	0.559	6.4268	6.24264	-5.03583	21	35	8	3UTR		0	0
hsa-miR-1291	NM_182948	PRKACB	..((((...((((((((((((((.&.)))))))).))))))..)))).	1596	1631	1	-24.1	1	0.00228436	0.588	2.19643	1.24563	-9.87071	18	23	8	3UTR		0	0
hsa-miR-1291	NM_182976	ZNF326	.(((((.((.(.(((((((((...&))))))))).)..))..))))).	3210	3233	1	-23.5	1	0.000253829	0.471	-0.0801065	-0.170024	-9.92632	17	23	9	3UTR		0	0
hsa-miR-1291	NM_182984	TRMT2A	..(((((((((..((.(((((((.&.)))).))))).....))))))))).	2414	2454	1	-28.6	1	0.000487406	0.515	-0.110733	0.673411	-9.82598	18	26	9	3UTR		0	1
hsa-miR-1291	NM_183228	IKZF3	(.(((((.(((.....(((((...&)))))...))).))))).).	5087	5107	1	-23.5	1	0.00178254	0.441	0.45205	-0.255215	-13.8762	14	20	5	3UTR		0	0
hsa-miR-1291	NM_183232	IKZF3	(.(((((.(((.....(((((...&)))))...))).))))).).	5021	5041	1	-23.5	1	0.00178254	0.441	-0.118517	-0.0828562	-13.8762	14	20	5	3UTR		0	0
hsa-miR-1291	NM_183234	RAB27A	...((((((((...(((((.(((.&.)))..)))))........)))))))).	1617	1650	1	-21.6	1	2.68831e-05	0.588	0.441008	0.236901	-12.0073	16	28	8	3UTR		0	0
hsa-miR-1291	NM_183235	RAB27A	...((((((((...(((((.(((.&.)))..)))))........)))))))).	1624	1657	1	-21.6	1	2.68831e-05	0.588	0.125798	0.162922	-12.0073	16	28	8	3UTR		0	0
hsa-miR-1291	NM_183236	RAB27A	...((((((((...(((((.(((.&.)))..)))))........)))))))).	1590	1623	1	-21.6	1	2.68831e-05	0.588	0.21333	0.330487	-12.0073	16	28	8	3UTR		0	0
hsa-miR-1291	NM_183353	RLIM	.(((((.((((((.....((((((&))))))......))))))))))).	7167	7191	1	-23.9	1	4.8835e-05	0.588	0.436614	0.763429	-7.16235	17	24	11	3UTR		0	0
hsa-miR-1291	NM_183372	NBPF11	(((((((..(((((((((((....&))))))))).))..))).)))).	3899	3922	1	-23.2	1	4.72213e-07	0.5	0.147793	0.0958675	-7.3076	18	23	9	3UTR		0	0
hsa-miR-1291	NM_183420	FBXO25	.(((((((.(...(((.((((((.&)))))))))..)))))))).	1230	1250	1	-25.2	1	1.74737e-07	0.485	0.150603	-0.350577	-12.3104	17	20	9	3UTR		0	0
hsa-miR-1291	NM_183421	FBXO25	.(((((((.(...(((.((((((.&)))))))))..)))))))).	1257	1277	1	-25.2	1	1.74737e-07	0.485	0.150603	-0.350577	-12.3104	17	20	9	3UTR		0	0
hsa-miR-1291	NM_194282	LIN54	.(((((((((.(((((((.(.(((&))).).)).)))))..))))))))).	5971	5997	1	-21.7	1	0.00650062	0.662	1.7709	1.89838	-6.6181	20	26	9	3UTR		0	0
hsa-miR-1291	NM_194285	SPTY2D1	((((((((((((..(((((((.((&)).)))).)))))))))).))))).	4741	4766	1	-24.9	1	0.00113093	0.5	1.98136	1.70533	-6.08354	21	25	10	3UTR		0	0
hsa-miR-1291	NM_194434	VAPA	.(((((.(.((...((((((((..&)))))))).))).))))).	4012	4031	1	-21.8	1	7.29446e-07	0.426	0.0559647	0.121785	-11.8862	16	19	8	3UTR		0	0
hsa-miR-1291	NM_194463	RNF128	.(((((((((((.((.(((((...&))).)).)).))...))))))))).	1882	1907	1	-21.9	1	0.0530389	0.603	1.08275	1.45257	-5.3155	18	25	9	3UTR		0	1
hsa-miR-1291	NM_198042	PDLIM2	(((((((.(((..(((((.(((..&)))...))))).)))))))))).	1332	1355	1	-23	1	0.00731548	0.456	0.0973474	-0.119468	-10.8871	18	23	10	3UTR		0	0
hsa-miR-1291	NM_198080	MSRB3	((((((.(((((...(((((((((&)))).))))).......))))))))))).	2440	2469	1	-25.2	1	8.45921e-05	0.515	1.33896	1.02485	-8.36268	20	29	11	3UTR		0	0
hsa-miR-1291	NM_198141	GANC	.(((((((.((((((...((((((&)))))).......))))))))))))).	3333	3360	1	-25.2	1	0.000196769	0.456	0.0485451	-0.0851038	-5.08276	19	27	13	3UTR		0	0
hsa-miR-1291	NM_198156	VHL	.((((((((((((((.(((.....&)).).)))))))))))))).	1084	1104	1	-25.3	1	1.30065e-05	0.456	0.375755	0.427377	-4.02637	17	20	14	3UTR		0	0
hsa-miR-1291	NM_198181	GOLGA6L9	((((((((.((..((((((((((.&)))))))))).)).))))..)))).	1810	1835	1	-23.8	1	3.33939e-05	0.574	0.950354	1.15244	-9.6299	20	25	10	3UTR		0	0
hsa-miR-1291	NM_198182	GRHL1	.(((((((.((...((((.((((.&)))).))))...))))))))).	2124	2146	1	-24.2	1	2.96791e-05	0.456	-0.421995	0.191305	-10.3425	17	22	9	3UTR		0	0
hsa-miR-1291	NM_198196	CD96	(((((((((.((((.(((..(...&)..))).))))...))))))))).	3382	3406	1	-22.6	1	0.00700538	0.588	-0.355116	-0.133718	-5.91553	17	24	9	3UTR		0	0
hsa-miR-1291	NM_198235	RNASE1	.(((((((((((.((((((((((.&))))))........))..)).))))))))))).	699	732	1	-26.3	1	0.00306974	0.529	1.84502	0.155816	-5.08246	21	33	11	3UTR		0	0
hsa-miR-1291	NM_198279	BCLAF3	(((((((..((.....((((....&.))))))..))))))).	5761	5791	1	-19.4	1	1.9599e-05	0.456	0	0	-13.7689	13	17	7	3UTR		0	0
hsa-miR-1291	NM_198320	CPM	((((((((((((((((((((((((&)))))..........)))))......................))))))).........................))).)))).	3027	3110	1	-23.2	1	0.00066795	0.485	0.129503	0.215418	-3.93757	24	83	7	3UTR		0	0
hsa-miR-1291	NM_198393	TEX14	..((((((((....(((.(((((.&)))))...)))...)))))))).	4656	4679	1	-25.1	1	2.52571e-05	0.529	2.70385	2.36566	-13.2745	16	23	8	3UTR		0	0
hsa-miR-1291	NM_198399	ARPP21	(((..((((((...(((((((((.&)))))))))...)).))))...))).	1804	1830	1	-22.9	1	0.140652	0.515	0.909678	0.863396	-16.5814	18	26	9	3UTR		0	0
hsa-miR-1291	NM_198484	ZNF621	..((((((.(((((((.(((.((.&)).)))))))))).)))))).	4210	4231	1	-25.1	1	0.00061257	0.529	0.279205	0.0367719	-6.01339	18	21	10	3UTR		0	0
hsa-miR-1291	NM_198485	TPRG1	..(((((.((.(((..(((((((.&)))))))..))).))))))).	4808	4829	1	-25	1	0.000807338	0.485	1.39216	1.45487	-11.0639	17	21	7	3UTR		0	0
hsa-miR-1291	NM_198490	RAB43	.((((((((.....(.(((((((.&)))))))))))))))).	1651	1668	1	-27.4	1	9.83344e-06	0.441	-0.377696	-0.384214	-13.5864	16	17	16	3UTR		0	1
hsa-miR-1291	NM_198491	CIBAR2	(((((((((((((.(..(((.((.&)))))..).)))))................)))))))).	1741	1780	1	-23.2	1	0.00166159	0.485	0.000326986	1.066	-5.02746	19	39	8	3UTR		0	1
hsa-miR-1291	NM_198515	CCDC172	.((((((((((((((....((((.&)))))))))))))................).)))).	1563	1599	1	-19.6	1	0.000779843	0.515	0.0623889	-0.00136864	-4.02637	18	36	13	3UTR		0	0
hsa-miR-1291	NM_198545	DRAXIN	(((((((((((((...((((((((&)))))..))).....))))))))))))).	3025	3054	1	-30.8	1	0.00190987	0.485	0.40852	0.634917	-5.76291	21	29	13	3UTR		0	0
hsa-miR-1291	NM_198571	NAT16	.((((((.(((.....(((((...&))))).))).)))))).	1608	1625	1	-25	1	2.9496e-05	0.426	0.982198	0.762542	-12.5682	14	17	6	3UTR		0	0
hsa-miR-1291	NM_198585	ENTPD8	((((((((...((((.((((..((&))..)))).)))))))))))).	1677	1699	1	-25	1	8.38412e-07	0.338	1.7772	1.64218	-9.29429	18	22	12	3UTR		0	0
hsa-miR-1291	NM_198693	KRTAP10-2	...(((((((((..(((((((...&)))))))..))))))))).	1051	1070	1	-26.8	1	1.41136e-05	0.309	-0.00675662	0.753617	-8.66051	16	19	9	3UTR		0	0
hsa-miR-1291	NM_198867	ALKBH6	.((((.((...((..((((((((.&))))))))..)))).)))).	556	576	1	-22.9	1	4.70964e-06	0.294	3.14224	2.36204	-12.4102	16	20	8	3UTR		0	0
hsa-miR-1291	NM_198890	ATG16L1	.(((((((.((((.((((.(((((&)))))))))..))))))).)))).	1705	1729	1	-25.5	1	0.00013179	0.485	0	0	-5.70655	20	24	9	3UTR		0	0
hsa-miR-1291	NM_198900	FMNL3	.((((((((((.((((((((....&.)))))))..).))))..)))))).	6222	6264	1	-26.5	1	0.00433364	0.456	0.122241	-0.441806	-7.14013	18	25	7	3UTR		0	0
hsa-miR-1291	NM_199003	THAP1	...((((((((..((((((((...&))))))))..)).)))))).	920	940	1	-20.4	1	0.000266178	0.662	0.513075	0.488847	-11.1505	16	20	8	3UTR		0	0
hsa-miR-1291	NM_199046	TEPP	(((((((((((.....(((((.((&.)).)).))).....))))))))))).	974	1024	1	-29.2	1	1.7212e-05	0.412	-0.576631	-0.0468094	-10.3988	18	27	11	3UTR		0	0
hsa-miR-1291	NM_199046	TEPP	..(((((((((..((((((((((.&))).....)))))))...))))))))).	1098	1126	1	-26.4	1	0.000184113	0.5	-0.00412265	-0.0203142	-9.59293	19	28	9	3UTR		0	0
hsa-miR-1291	NM_199129	PEDS1	((((((((((....(.(((((...&)))))))))))))))).	1228	1245	1	-25.5	1	1.42083e-08	0.353	0.398925	-0.247978	-12.4882	16	17	16	3UTR		0	0
hsa-miR-1291	NM_199169	PMEPA1	((.((((..(((...((((((((.&)))))))).................)))..)))).)).	2420	2458	1	-26.1	1	0.0135731	0.426	-0.140834	-0.466213	-11.7466	17	38	8	3UTR		0	0
hsa-miR-1291	NM_199171	PMEPA1	((.((((..(((...((((((((.&)))))))).................)))..)))).)).	2451	2489	1	-26.1	1	0.0135731	0.426	0.893843	-0.635029	-11.7466	17	38	8	3UTR		0	0
hsa-miR-1291	NM_199231	GDNF	(((((((((((....(((..((..&))..)))))))))))))).	2457	2476	1	-24.7	1	1.48705e-06	0.426	0.967015	0.573163	-10.1658	16	19	14	3UTR		0	0
hsa-miR-1291	NM_199289	NEK5	((((((((.(((((..((......&.))..))))))))))))).	2564	2599	1	-22.3	1	0.000341842	0.456	2.78101	3.84123	-5.96246	15	19	13	3UTR		0	0
hsa-miR-1291	NM_199328	CLDN8	((((((((...((((...((((((&)))))))))))))))))).	1565	1584	1	-21.2	1	0.000406269	0.603	0.689426	0.729447	-9.29429	18	19	18	3UTR		0	0
hsa-miR-1291	NM_199330	HOMER2	..((((((((((............&)))))))))).	1505	1516	1	-21.4	1	0.00457675	0.588	3.96169	4.70044	-8.07147	10	11	10	3UTR		0	0
hsa-miR-1291	NM_199344	SFT2D2	.((((((....(((((((((((..&)))))))))))...)))...))).	6450	6474	1	-24.3	1	0.00062311	0.559	-0.0815536	0.164355	-11.2306	17	24	11	3UTR		0	0
hsa-miR-1291	NM_201274	MPRIP	((((((((((.((((....(((((&)))))...)))).)))))))))).	10705	10729	1	-29	1	0.000333685	0.574	-0.513261	-0.195445	-6.9954	19	24	10	3UTR		0	0
hsa-miR-1291	NM_201397	GPX1	.((((((..(((.(((.(((((((&))))))))))))).)))))).	1003	1024	1	-24.5	1	0.000210137	0.471	1.22859	2.61102	-8.45248	19	21	13	3UTR		0	0
hsa-miR-1291	NM_201400	EEF2KMT	(((((..(((((((((.(((((((&)))))))))..))))).))..))))).	1675	1702	1	-24.1	1	0.000678385	0.412	0.654032	1.66209	-7.38222	21	27	9	3UTR		0	0
hsa-miR-1291	NM_201521	KLC4	((((((((((((((((((((((((&)))))))).))))))))))).............))))).	2222	2261	1	-36.8	1	2.4112e-07	0.353	0.567849	0.16002	-3.93757	24	39	11	3UTR		0	0
hsa-miR-1291	NM_201522	KLC4	((((((((((((((((((((((((&)))))))).))))))))))).............))))).	2619	2658	1	-36.8	1	2.4112e-07	0.353	0.567849	0.16002	-3.93757	24	39	11	3UTR		0	0
hsa-miR-1291	NM_201523	KLC4	((((((((((((((((((((((((&)))))))).))))))))))).............))))).	2493	2532	1	-36.8	1	2.4112e-07	0.353	0.567849	0.16002	-3.93757	24	39	11	3UTR		0	0
hsa-miR-1291	NM_201571	CACNB2	..((((((((((((((.(((....&.))).)))))))......))))))).	4151	4199	1	-24.5	1	0.0342151	0.647	1.22826	0.350177	-4.957	17	26	7	3UTR		0	0
hsa-miR-1291	NM_201572	CACNB2	..((((((((((((((.(((....&.))).)))))))......))))))).	4079	4127	1	-24.5	1	0.0342151	0.647	1.22826	0.350177	-4.957	17	26	7	3UTR		0	0
hsa-miR-1291	NM_201590	CACNB2	..((((((((((((((.(((....&.))).)))))))......))))))).	3535	3583	1	-24.5	1	0.0342151	0.647	1.22826	0.350177	-4.957	17	26	7	3UTR		0	0
hsa-miR-1291	NM_201596	CACNB2	..((((((((((((((.(((....&.))).)))))))......))))))).	3792	3840	1	-24.5	1	0.0342151	0.647	1.22826	0.350177	-4.957	17	26	7	3UTR		0	0
hsa-miR-1291	NM_201597	CACNB2	..((((((((((((((.(((....&.))).)))))))......))))))).	3720	3768	1	-24.5	1	0.0342151	0.647	1.22826	0.350177	-4.957	17	26	7	3UTR		0	0
hsa-miR-1291	NM_201598	EEF2KMT	(((((..(((((((((.(((((((&)))))))))..))))).))..))))).	1573	1600	1	-24.1	1	0.000678385	0.412	5.14211	1.58939	-7.38222	21	27	9	3UTR		0	0
hsa-miR-1291	NM_201631	TGM5	.((((((((..(((((((((....&))))..))))))))))))).	2594	2614	1	-24.1	1	0.000256988	0.441	0.889327	1.01069	-7.86061	17	20	13	3UTR		0	1
hsa-miR-1291	NM_201647	STAMBP	.(((((((.((...(((((.(((.&.))).)))))))))).)))).	5945	5998	1	-23.5	1	0.000399376	0.5	-0.35692	0.396102	-10.3425	17	21	10	3UTR		0	0
hsa-miR-1291	NM_203329	CD59	((.((((((((((..(((.(((..&.))).))).)))))))))).)).	1019	1060	1	-26.4	1	0.00126726	0.544	0.210546	-0.174466	-7.0874	18	23	10	3UTR		0	0
hsa-miR-1291	NM_203330	CD59	((.((((((((((..(((.(((..&.))).))).)))))))))).)).	1120	1161	1	-26.4	1	0.00126726	0.544	0.210547	-0.104712	-7.0874	18	23	10	3UTR		0	0
hsa-miR-1291	NM_203331	CD59	((.((((((((((..(((.(((..&.))).))).)))))))))).)).	948	989	1	-26.4	1	0.00126726	0.544	-0.238064	-0.0513712	-7.0874	18	23	10	3UTR		0	0
hsa-miR-1291	NM_203376	TMEM81	...((((((((((..(((((((((&)))))))))......)))).)))).)).	989	1017	1	-23.5	1	0.0290674	0.471	1.62423	1.77485	-8.10683	19	28	9	3UTR		0	0
hsa-miR-1291	NM_203390	RBM12B	(((((((((((((((((((.....&)))..))))).))))))).)))).	5847	5871	1	-23.5	1	4.43817e-05	0.559	0.0995975	-0.282449	-3.93757	19	24	7	3UTR		0	0
hsa-miR-1291	NM_203504	G3BP2	..(((..((((...(.((((((((&)))))))))..))))..))).	1584	1605	1	-22	1	0.000316525	0.515	2.4647	2.227	-14.1275	16	21	9	3UTR		0	0
hsa-miR-1291	NM_205842	NCKAP1	.((((((((((((....(((((((&)))))))..)))))))........................))))).	4922	4968	1	-24.8	1	0.0101435	0.603	0.118284	-0.117461	-5.61866	19	46	7	3UTR		0	0
hsa-miR-1291	NM_206839	MORF4L1	((((...((((.((((.((((((.&.)))))))))).))))...)))).	2043	2077	1	-22.9	1	0.00161936	0.647	0	0	-14.8481	18	24	10	3UTR		0	0
hsa-miR-1291	NM_206853	QKI	(((((((.((((((((((((.(((&.)))))))))))).))..).))))))).	9434	9482	1	-26.4	1	1.25693e-06	0.441	1.8109	1.42357	-6.25121	22	28	12	3UTR		0	0
hsa-miR-1291	NM_206854	QKI	(((((((.((((((((((((.(((&.)))))))))))).))..).))))))).	10713	10761	1	-26.4	1	1.25693e-06	0.441	1.8109	1.42357	-6.25121	22	28	12	3UTR		0	0
hsa-miR-1291	NM_206855	QKI	(((((((.((((((((((((.(((&.)))))))))))).))..).))))))).	11660	11708	1	-26.4	1	1.25693e-06	0.441	1.8109	1.42357	-6.25121	22	28	12	3UTR		0	0
hsa-miR-1291	NM_206876	PPP1CB	..((((((((.(((((((((((..&)))))))).........))).)))).....)))).	2348	2383	1	-21.5	1	6.59489e-05	0.588	3.73335	3.70097	-7.78178	19	35	8	3UTR		0	0
hsa-miR-1291	NM_206914	EEF1AKMT3	.(((((((((((((((((((....&.))))).)))).)))))))))).	2020	2070	1	-25.3	1	0.00131542	0.559	0.283134	0.0831289	-3.79332	19	23	10	3UTR		0	0
hsa-miR-1291	NM_206933	USH2A	.(((((((((.(((((.(((((((&))))))).))...............))).))))))))).	16443	16482	1	-26.3	1	0.000484469	0.618	3.56891	3.93894	-6.6181	21	39	9	3UTR		0	0
hsa-miR-1291	NM_206964	FAM3B	.((((((..(((((..(((((((.&)))))))...............))))))))))).	1051	1085	1	-25.2	1	0.000109592	0.544	-0.0312527	-0.650347	-8.13185	18	34	11	3UTR		0	0
hsa-miR-1291	NM_207012	AP3M1	.(((((((((((..((((((((((&))))))))))....).))).)).)).))).	2993	3023	1	-25.6	1	6.19953e-05	0.441	1.77034	2.84251	-5.9393	21	30	10	3UTR		0	0
hsa-miR-1291	NM_207118	GTF2H5	(((((..(((((((((..((((((&))))))..))))).))))))))).	6922	6946	1	-23.2	1	0.0443526	0.515	-0.104952	0.00800335	-7.38222	20	24	9	3UTR		0	0
hsa-miR-1291	NM_207127	PAOX	((((((((((((((((((((.((.&.))))))))))))))...)))))))).	1257	1313	1	-31.3	1	5.22637e-05	0.529	0.195326	-0.443284	-3.93757	22	27	14	3UTR		0	1
hsa-miR-1291	NM_207317	ZNF474	.(((((((...(.((..((((((.&))))))..)))))))))).	1549	1568	1	-20.9	1	0.000151731	0.559	-0.163496	0.0484988	-10.4392	16	19	10	3UTR		0	0
hsa-miR-1291	NM_207327	CDPF1	.(((((.(((((((((.(((.(((&))))))))))))).))))))).	1114	1136	1	-26.4	1	0.00135465	0.397	0.214896	0.932002	-5.33701	20	22	13	3UTR		0	0
hsa-miR-1291	NM_207344	SPRYD4	((((((...((((((((((.(((.&)))..))))))))))....))).))).	10329	10356	1	-24.5	1	0.000102886	0.588	0.131219	0.49623	-8.85129	19	27	10	3UTR		0	0
hsa-miR-1291	NM_207351	PRRT3	((((((((..(.(.((((.((...&)))))).).)..)))))))).	3093	3114	1	-25.8	1	1.37523e-08	0.353	0.123739	0.269757	-10.4401	16	21	8	3UTR		0	0
hsa-miR-1291	NM_207355	POTEB3	.(((((((((((....(((((((.&))))))).))))).............)))))).	3529	3562	1	-25.4	1	5.60994e-07	0.441	1.5671	1.20559	-6.90779	18	33	7	3UTR		0	0
hsa-miR-1291	NM_207359	GADL1	.....(((..((((((((((((((&))))))))))))))...))).	2529	2550	1	-23	1	0.0447656	0.794	2.94601	4.40008	-15.9645	17	21	14	3UTR		0	0
hsa-miR-1291	NM_207365	AADACL2	.((((((((((((.(((..((...&)).)))...)))).)))))))).	4668	4691	1	-22	1	0.000330075	0.676	0.0599081	0.016403	-4.65016	17	23	8	3UTR		0	0
hsa-miR-1291	NM_207368	MCRIP1	.((.((((((...((((((.(((.&))).)))))))))))))).	1235	1254	1	-24.7	1	1.48289e-05	0.313	-0.0979725	0.131859	-14.2861	17	19	14	3UTR		0	0
hsa-miR-1291	NM_207372	SH2D4B	(((((.((((((...((((((((.&))))))))................)))))).))))).	2439	2476	1	-25.2	1	0.000286405	0.603	0.379586	-0.219804	-8.71995	19	37	8	3UTR		0	0
hsa-miR-1291	NM_207406	BEND4	.((.(((.(.((((((((((((..&)))))))))))).).))))).	4070	4091	1	-26.8	1	9.69418e-05	0.426	-0.335119	-0.260798	-10.3815	18	21	12	3UTR		0	0
hsa-miR-1291	NM_207435	C12orf76	(((((((((((..((.........&))..))))))))))).	1313	1329	1	-22	1	8.38463e-05	0.456	0.00709445	0.266462	-8.80656	13	16	11	3UTR		0	0
hsa-miR-1291	NM_207517	ADAMTSL3	((((((((((((((((.((((...&)))))))))...))))))))))).	6378	6402	1	-23.3	1	0.120156	0.529	0.0931504	0.12168	-3.93757	20	24	11	3UTR		0	0
hsa-miR-1291	NM_207518	PRKACA	..((((((.(((.(.((((((((.&)))))))).)...)))...)))))).	1396	1422	1	-25.3	1	0.00120293	0.441	1.25663	2.56165	-8.03797	18	26	8	3UTR		0	0
hsa-miR-1291	NM_207584	IFNAR2	.((((((..(((((((...((...&))...))))))))))))).	1995	2014	1	-23.6	1	1.36736e-06	0.441	-0.432896	0.11132	-7.16335	15	19	13	3UTR		0	0
hsa-miR-1291	NM_207660	ZC3H14	((((((((((.((((.........&)))).)))))))))).	16097	16113	1	-26.5	1	0.000210995	0.485	-0.815048	-0.358928	-6.9954	14	16	10	3UTR		0	0
hsa-miR-1291	NM_207661	ZC3H14	((((((((((.((((.........&)))).)))))))))).	16151	16167	1	-26.5	1	0.000210995	0.485	0	0	-6.9954	14	16	10	3UTR		0	0
hsa-miR-1291	NM_207662	ZC3H14	((((((((((.((((.........&)))).)))))))))).	15488	15504	1	-26.5	1	0.000210995	0.485	-0.815048	-0.358928	-6.9954	14	16	10	3UTR		0	0
hsa-miR-1291	NM_213589	RAPH1	..((((((((((((((((((....&))))))......)))).)))))))).	9608	9634	1	-24.1	1	0.0205784	0.603	0.251252	0.524006	-4.957	18	26	8	3UTR		0	0
hsa-miR-1291	NM_213607	CCDC103	.(((((((((((((((((((((((&))).))))))))))))...))))............)))).	2206	2246	1	-27.4	1	5.09784e-05	0.412	3.17609	3.29445	-3.79332	23	40	12	3UTR		0	0
hsa-miR-1291	NM_213611	SLC25A3	.((((..(((((.((((((((...&.)))))))))))..))..)))).	4518	4546	1	-25.9	1	0.000169985	0.426	0.137982	0.0407718	-8.5271	17	23	11	3UTR		0	0
hsa-miR-1291	NM_213622	STAMBP	.(((((((.((...(((((.(((.&.))).)))))))))).)))).	6459	6512	1	-23.5	1	0.000399376	0.5	0.48341	0.28424	-10.3425	17	21	10	3UTR		0	0
hsa-miR-1291	NM_213651	SLC25A24	..((((..(.((((((.((((((.&)))))))))))).)..)))).	2546	2567	1	-21.3	1	0.00258143	0.662	0	0	-10.0568	17	21	12	3UTR		0	0
hsa-miR-1291	NM_213655	WNK1	.((((((((((((((((.(((...&))).))))))).)))))))..)).	10238	10262	1	-23.3	1	0.000309563	0.529	0.461249	0.862447	-3.79332	19	24	7	3UTR		0	0
hsa-miR-1291	XM_005244966	PLEKHA6	.(((((((.((.(.(((((.(.((&.)).)))))).).)).))))))).	3925	3977	1	-25.6	1	2.05293e-06	0.397	0	0	-9.05336	18	24	7	3UTR		0	1
hsa-miR-1291	XM_005244993	NFASC	((((((((.((.....((((((..&)))))))))))))))).	7971	7988	1	-26.3	1	5.74351e-05	0.397	0	0	-11.4552	16	17	16	3UTR		0	1
hsa-miR-1291	XM_005245364	GATAD2B	.(((((...(((((.(((.((((.&)))).))).)))))))))).	2512	2532	1	-21.4	1	0.0084013	0.456	0	0	-9.44249	17	20	10	3UTR		0	0
hsa-miR-1291	XM_005245510	SNX27	(((((..((((((((.(((((...&))))).)))))))).......))))).	5777	5804	1	-27.8	1	0.0373144	0.588	0	0	-7.61527	18	27	8	3UTR		0	0
hsa-miR-1291	XM_005246086	ATG16L1	.(((((((.((((.((((.(((((&)))))))))..))))))).)))).	1772	1796	1	-25.5	1	0.00013179	0.485	0	0	-5.70655	20	24	9	3UTR		0	0
hsa-miR-1291	XM_005246469	GPD2	(.(((((((((.....(((((((.&)))))))))))))))).).	4660	4679	1	-25	1	0.000281327	0.559	0	0	-11.5625	17	19	16	3UTR		0	0
hsa-miR-1291	XM_005246708	NYAP2	.(((((((((((((((.(((....&))).))))))))).................)))))).	8364	8401	1	-23.8	1	0.000322026	0.603	0	0	-3.79332	18	37	9	3UTR		0	0
hsa-miR-1291	XM_005246720	USP37	((((((((((((....((.(((..&)))))..........))).))))))))).	3522	3551	1	-23.6	1	0.00433497	0.559	0	0	-7.05204	17	29	9	3UTR		0	1
hsa-miR-1291	XM_005246721	USP37	((((((((((((....((.(((..&)))))..........))).))))))))).	3414	3443	1	-23.6	1	0.00433497	0.559	0	0	-7.05204	17	29	9	3UTR		0	1
hsa-miR-1291	XM_005246724	USP37	((((((((((((....((.(((..&)))))..........))).))))))))).	3384	3413	1	-23.6	1	0.00433497	0.559	0	0	-7.05204	17	29	9	3UTR		0	1
hsa-miR-1291	XM_005246865	CSRNP3	(((((..((((((..(((((....&.)))))..))))))....))))).	7440	7494	1	-21.4	1	0.000126723	0.529	0	0	-8.97451	16	24	6	3UTR		0	0
hsa-miR-1291	XM_005246948	ANKRD44	...(((((((((.((.((.((((.&)))).))..)).))))))))).	3276	3298	1	-21.8	1	4.53574e-05	0.426	0	0	-8.03672	17	22	9	3UTR		0	0
hsa-miR-1291	XM_005247269	ZDHHC23	.(((((.((((..((((..(((((&)))))...)))).))))))))).	3141	3164	1	-23.4	1	0.000113704	0.529	0	0	-9.97295	18	23	9	3UTR		0	0
hsa-miR-1291	XM_005247269	ZDHHC23	(((((((....((.((((((....&)))))).))....))))))).	1777	1798	1	-22.3	1	1.32153e-05	0.544	0	0	-12.2317	15	21	7	3UTR		0	0
hsa-miR-1291	XM_005247270	ZDHHC23	.(((((.((((..((((..(((((&)))))...)))).))))))))).	4617	4640	1	-23.4	1	0.000113704	0.529	0	0	-9.97295	18	23	9	3UTR		0	0
hsa-miR-1291	XM_005247270	ZDHHC23	(((((((....((.((((((....&)))))).))....))))))).	3253	3274	1	-22.3	1	1.32153e-05	0.544	0	0	-12.2317	15	21	7	3UTR		0	0
hsa-miR-1291	XM_005247442	LEKR1	((((((((((...(((.(((((.(&.).))))))))))))).))))).	653	683	1	-21.2	1	0.0257769	0.618	0	0	-11.3983	19	23	13	3UTR		0	0
hsa-miR-1291	XM_005247823	B3GNT5	((((((((((((.(((((((.(((&)))..))))).)).)))).)))))))).	4026	4054	1	-23.9	1	0.000213409	0.662	0	0	-5.22671	22	28	8	3UTR		0	0
hsa-miR-1291	XM_005247825	B3GNT5	((((((((((((.(((((((.(((&)))..))))).)).)))).)))))))).	3982	4010	1	-23.9	1	0.000213409	0.662	0	0	-5.22671	22	28	8	3UTR		0	0
hsa-miR-1291	XM_005248378	SPEF2	((.((((..((((((((((((...&))))))))))....))....))))..)).	3127	3156	1	-21	1	0.0182777	0.662	0	0	-8.86514	18	29	10	3UTR		0	0
hsa-miR-1291	XM_005248551	WDR41	(.(((((((((..((.((((((((&))))))))))......................))))))))).).	3323	3367	1	-25.7	1	0.00149469	0.529	0	0	-9.97023	20	44	10	3UTR		0	0
hsa-miR-1291	XM_005250239	TSPAN12	.....((..(((((((((((....&)))))))))))..)).	2096	2112	1	-19.8	0	0.0165649	0.706	0	0	-17.0356	13	16	11	3UTR		0	0
hsa-miR-1291	XM_005250760	WWP1	.(((((((.(((((((((((((((&)))))))).)))))...)).)))).))).	3578	3607	1	-26.7	1	0.000223318	0.676	0	0	-4.84971	22	29	8	3UTR		0	0
hsa-miR-1291	XM_005251996	MUSK	..((((((((((((((..(((...&)))..))))................)))))))))).	4720	4756	1	-20.7	1	0.0028052	0.618	0	0	-4.957	17	36	10	3UTR		0	0
hsa-miR-1291	XM_005253067	SLC1A2	.(((((((..((((((((((.((.&)).))))))))))..))))))).	7861	7884	1	-28.6	1	0.000389647	0.632	0	0	-6.09222	19	23	10	3UTR		0	0
hsa-miR-1291	XM_005253067	SLC1A2	.((((((((....(((((.((((.&))))..))))).....)))))))).	4850	4875	1	-25.5	1	0.000132325	0.574	0	0	-12.4965	17	25	8	3UTR		0	0
hsa-miR-1291	XM_005253102	TSPAN4	((((((((.(((.(((((((....&))))).)).))).)))))))).	1233	1255	1	-27.5	1	4.76992e-07	0.324	0	0	-6.28309	18	22	8	3UTR		0	0
hsa-miR-1291	XM_005253109	TUB	.(((((((((((.((..((.(((.&)))..))..)).))))))))))).	5347	5371	1	-28	1	8.13158e-09	0.426	0	0	-5.3155	18	24	11	3UTR		0	0
hsa-miR-1291	XM_005253944	BRAP	.(((((...((((((.((((((..&))))))...))))))..............))))).	2136	2171	1	-25.1	1	1.40093e-05	0.5	0	0	-8.94009	17	35	6	3UTR		0	0
hsa-miR-1291	XM_005255633	NUDT16L1	.(((((((((((..(((((((...&))).))))........))))))))))).	6724	6752	1	-29.5	1	2.20458e-05	0.353	0	0	-5.9393	18	28	11	3UTR		0	0
hsa-miR-1291	XM_005256321	SPG7	...(((((((((..(((.(.((((&)))).).)))..))))))))).	1851	1873	1	-25	1	0.021543	0.397	0	0	-8.66051	17	22	9	3UTR		0	0
hsa-miR-1291	XM_005256564	MPRIP	((((((((((.((((....(((((&)))))...)))).)))))))))).	10530	10554	1	-29	1	0.000333685	0.574	0	0	-6.9954	19	24	10	3UTR		0	0
hsa-miR-1291	XM_005256832	GAS7	(((((.((((((((((((((.(((&)))..)))))))).))))))..).)))).	2916	2945	1	-24.6	1	0.000144389	0.632	0	0	-5.83853	22	29	8	3UTR		0	0
hsa-miR-1291	XM_005257083	WIPF2	(((((.((.(((((..((((((.(&).))))))..)).))).)).).)))).	6848	6875	1	-22.6	1	0.000183542	0.529	0	0	-7.86342	19	27	6	3UTR		0	0
hsa-miR-1291	XM_005257084	WIPF2	(((((.((.(((((..((((((.(&).))))))..)).))).)).).)))).	6806	6833	1	-22.6	1	0.000183542	0.529	0	0	-7.86342	19	27	6	3UTR		0	0
hsa-miR-1291	XM_005257262	SNX11	.(((...((((((((.(((((...&)))))))))))))...))).	1315	1335	1	-24.9	1	0.000157543	0.515	0	0	-11.5901	16	20	13	3UTR		0	0
hsa-miR-1291	XM_005257552	RARA	.(((((((((.(.((....(((((&))))))).).))))))))).	3642	3662	1	-25.2	1	4.68398e-05	0.309	0	0	-8.14028	17	20	9	3UTR		0	0
hsa-miR-1291	XM_005257822	RECQL5	.(((((((.((..((.((((((((&)))))))))).))))))))).	2515	2536	1	-31.8	1	1.2159e-08	0.324	0	0	-9.7187	19	21	10	3UTR		0	1
hsa-miR-1291	XM_005258515	IRGQ	.((((((((((..((((.((....&)).))))..)))))))).)).	4933	4954	1	-25.1	1	4.30856e-06	0.471	0	0	-8.42926	16	21	8	3UTR		0	0
hsa-miR-1291	XM_005259472	SH2D3A	((((((((((((....(((.(...&.).)))......)))))))))))).	1677	1723	1	-28	1	1.70923e-05	0.397	0	0	-7.05204	16	25	12	3UTR		0	0
hsa-miR-1291	XM_005260007	WIZ	.((((((..(((((((((((((((&)))))))).)))))))..............)))))).	6418	6455	1	-28	1	0.000143497	0.368	0	0	-7.16335	21	37	8	3UTR		0	0
hsa-miR-1291	XM_005260010	WIZ	.((((((..(((((((((((((((&)))))))).)))))))..............)))))).	4192	4229	1	-28	1	0.000143497	0.368	0	0	-7.16335	21	37	8	3UTR		0	0
hsa-miR-1291	XM_005260835	PANK2	.((((.((((((((.((.((((((&))))))..)).))))))))...)))).	1644	1671	1	-21.5	1	0.00324388	0.574	0	0	-6.42973	20	27	8	3UTR		0	1
hsa-miR-1291	XM_005260889	SNPH	((((((((.(((((((((((....&)))).))))))).)))))))).	2132	2154	1	-31.4	1	1.03129e-06	0.353	0	0	-4.99396	19	22	8	3UTR		0	1
hsa-miR-1291	XM_005261793	KIAA1671	..((((((((((.((((((((((.&))))))..)))))))).)))))).	6233	6257	1	-29	1	8.30494e-06	0.559	0	0	-6.24613	20	24	8	3UTR		0	0
hsa-miR-1291	XM_005262774	THAP6	(((((((((((((((((((.((..&)).)))))))).)).......))))))))).	1842	1873	1	-22.7	1	0.00896692	0.544	0	0	-3.93757	21	31	9	3UTR		0	0
hsa-miR-1291	XM_005262898	MFSD8	.((((((((((((((....((((.&))))....))))))).))))))).	2802	2826	1	-21.6	1	0.000179649	0.662	0	0	-4.02637	18	24	7	3UTR		0	0
hsa-miR-1291	XM_005263280	ABRAXAS1	..(((((((((..((((((((...&.)))))))).))))))....))).	2597	2647	1	-22.7	1	5.01554e-05	0.662	0	0	-9.59293	17	24	8	3UTR		0	0
hsa-miR-1291	XM_005263543	MFN2	..(((((.(((...((((((....&))))))..))).))))).	3940	3958	1	-24	1	0.000231461	0.515	0	0	-12.7634	14	18	6	3UTR		0	0
hsa-miR-1291	XM_005263545	MFN2	..(((((.(((...((((((....&))))))..))).))))).	3790	3808	1	-24	1	0.000231461	0.515	0	0	-12.7634	14	18	6	3UTR		0	0
hsa-miR-1291	XM_005263728	RALB	.((.(((((((((.(((..(((((&)))))..))).)).))))))))).	1831	1855	1	-23.1	1	7.35457e-05	0.456	0	0	-7.68219	19	24	9	3UTR		0	0
hsa-miR-1291	XM_005264850	LRRC3B	(((((...((.(((((((..(((.&)))..))))))).))))))).	7903	7924	1	-22.3	1	5.09547e-05	0.456	0	0	-12.5206	17	21	7	3UTR		0	0
hsa-miR-1291	XM_005265798	CPLX2	((((((.(((((..(((((((.((&)).)))))))))))).))).))).	3218	3242	1	-25.2	1	9.08065e-07	0.412	0	0	-7.62723	20	24	12	3UTR		0	1
hsa-miR-1291	XM_005266185	ZNF84	(((.((((((((((((((((.((.&.)).)))))))))).)).)))).))).	7069	7116	1	-28.6	1	0.00247271	0.529	0	0	-6.9696	21	27	10	3UTR		0	0
hsa-miR-1291	XM_005266419	ATP8A2	((((((((.(((.....((((.((&)).))))))))))))))).	8889	8908	1	-24.3	1	3.88481e-07	0.324	0	0	-8.10843	17	19	15	3UTR		0	1
hsa-miR-1291	XM_005267119	TNFAIP3	..((((((((....((((((....&))))))...)))))))).	3350	3368	1	-22.2	1	0.00649769	0.647	0	0	-13.2745	14	18	8	3UTR		0	0
hsa-miR-1291	XM_005267200	SYNJ2	.(((((((.(((..((((......&))))..)))))))))).	5543	5560	1	-23	1	4.86813e-05	0.559	0	0	-6.99569	14	17	10	3UTR		0	0
hsa-miR-1291	XM_005267418	ACIN1	((((((((.(((....((((.((.&.)).))))...))).)))))))).	2500	2541	1	-24	1	2.14951e-06	0.426	0	0	-8.10843	17	24	8	3UTR		0	0
hsa-miR-1291	XM_005267683	MAP3K9	..(((((.((((((((.(((((((&)))))))...))).)))))))))).	6057	6082	1	-27.5	1	2.45787e-05	0.441	0	0	-7.27064	20	25	10	3UTR		0	1
hsa-miR-1291	XM_005269231	SLC16A7	...((((((((....((((.((((&))))))))..)))))))).	7885	7904	1	-23.4	1	0.011954	0.397	0	0	-12.7428	16	19	8	3UTR		0	0
hsa-miR-1291	XM_005269498	PIK3AP1	.(((((((...(((..(((((...&)))))...)))))))).)).	2958	2978	1	-22.1	1	7.64502e-06	0.515	0	0	-9.88549	15	20	8	3UTR		0	0
hsa-miR-1291	XM_005272316	HSF1	..((((((.((.(((((((((.((&.))...))))))))).))....)))))).	1856	1893	1	-28.9	1	2.8929e-06	0.279	0	0	-9.36019	19	29	9	3UTR		0	0
hsa-miR-1291	XM_005273810	DLG2	...((((.(((...((((((((.(&).)).))))))...))).)))).	3881	3904	1	-22.5	1	0.0517225	0.529	0	0	-14.3209	16	23	6	3UTR		0	0
hsa-miR-1291	XM_005274035	KMT5B	.((((((.(((....((((((...&))))))...))).)))))).	5288	5308	1	-25	1	0.000454457	0.5	0	0	-12.3352	15	20	6	3UTR		0	0
hsa-miR-1291	XM_005274140	RAB3IL1	.((((((..((((((((((((((.&.)))))))....)))))))..)))).)).	1705	1752	1	-27.1	1	0.00327844	0.426	0	0	-7.16335	20	29	7	3UTR		0	0
hsa-miR-1291	XM_005274374	MTMR2	....(((.((((((((((((.((.&.)).)))))))).)))).))).	3487	3514	1	-23.3	1	0.000854331	0.588	0	0	-11.8602	17	22	8	3UTR		0	0
hsa-miR-1291	XM_005274668	IRAK1	.((((((..(((.((.((((((((&))))))))))...)))..................)))))).	2555	2596	1	-24.4	1	0.000112359	0.324	0	0	-8.68553	19	41	10	3UTR		0	0
hsa-miR-1291	XM_006710441	EPHB2	.(((((((..((.((.(((((((.&)))))))))))))))))).	3836	3855	1	-24.9	1	7.55438e-06	0.471	0	0	-7.6144	18	19	18	3UTR		0	1
hsa-miR-1291	XM_006711141	CELF3	((.((((((((((.(((((.....&))))).))))))))))..)).	5022	5043	1	-26.1	1	0.0500645	0.603	0	0	-6.35195	17	21	10	3UTR		0	0
hsa-miR-1291	XM_006711334	MEF2D	.(.((((.((((((((((..(...&)..)))))))))).))).).).	2963	2985	1	-27.1	1	2.82564e-05	0.353	0	0	-7.6645	16	22	10	3UTR		0	0
hsa-miR-1291	XM_006711977	FOSL2	.(((((((.((((((((((((((.&)))))).)..))))...)))))))))).	4422	4450	1	-28.7	1	1.12146e-05	0.412	0	0	-4.84971	21	28	10	3UTR		0	0
hsa-miR-1291	XM_006712875	TTLL4	((((((.((((((((.((((((((&)))))).........)).))))..)))))))))).	5460	5495	1	-26.1	1	0.0164961	0.544	0	0	-5.71431	22	35	10	3UTR		0	0
hsa-miR-1291	XM_006712875	TTLL4	.(((((((..((..(..((((((.&))))))..)..))..))))))).	4751	4774	1	-24.9	1	6.04e-05	0.456	0	0	-8.47124	16	23	7	3UTR		0	0
hsa-miR-1291	XM_006713093	ALS2CL	(((.((((.((((..((((((...&))))))..))))))))))).	2171	2191	1	-26.4	1	7.98765e-05	0.412	0	0	-9.61828	17	20	11	3UTR		0	0
hsa-miR-1291	XM_006713451	NR1D2	..((((((((((((((((((....&)))).....)))))))).)))))).	2682	2707	1	-20.6	1	0.00613768	0.691	0	0	-4.957	18	25	8	3UTR		0	0
hsa-miR-1291	XM_006714158	TRIM2	.((((((((((((((.(((.((.(&).)).))).)))))))))).....)))).	3751	3780	1	-25.7	1	0.000816209	0.647	0	0	-4.02637	20	29	10	3UTR		0	0
hsa-miR-1291	XM_006714160	TRIM2	.((((((((((((((.(((.((.(&).)).))).)))))))))).....)))).	4551	4580	1	-25.7	1	0.000816209	0.647	0	0	-4.02637	20	29	10	3UTR		0	0
hsa-miR-1291	XM_006714161	TRIM2	.((((((((((((((.(((.((.(&).)).))).)))))))))).....)))).	4548	4577	1	-25.7	1	0.000816209	0.647	0	0	-4.02637	20	29	10	3UTR		0	0
hsa-miR-1291	XM_006714812	DELE1	((((((((.((((.(((((.(...&).))).))...)))))))))))).	3831	3855	1	-28.3	1	1.31203e-05	0.353	0	0	-5.8508	18	24	12	3UTR		0	0
hsa-miR-1291	XM_006715043	DAAM2	(.((((((((((...((((((...&.))))))...)))))))))).).	5716	5764	1	-30.8	1	2.7391e-06	0.456	0	0	-7.98267	17	23	10	3UTR		0	0
hsa-miR-1291	XM_006715082	MYLK4	(((((((((....(((((.(((((&.))))))))))....))))))).)).	2925	2974	1	-30.2	1	1.34077e-05	0.353	0	0	-12.6408	19	26	10	3UTR		0	0
hsa-miR-1291	XM_006715082	MYLK4	((((((((.(((.((((((((...&)))).))))...)))..)))))))).	5507	5533	1	-25.9	1	0.00039075	0.544	0	0	-6.28309	19	26	8	3UTR		0	0
hsa-miR-1291	XM_006717720	INPP5F	.(((((((((.(((((((((((.(&).))))))...))))))))................)))))).	2938	2980	1	-22.1	1	2.25141e-05	0.456	0	0	-6.6181	21	42	8	3UTR		0	0
hsa-miR-1291	XM_006717725	ZSWIM8	((((((((((((.((.((((((((&))))))...)).)).))).))))))))).	5918	5947	1	-27.2	1	0.000997484	0.441	0	0	-5.45975	22	29	9	3UTR		0	0
hsa-miR-1291	XM_006718373	TSPAN18	((((((((.((((((...((((((&.)))))).....))))))..)))))))).	1727	1774	1	-28.8	1	8.01829e-06	0.397	0	0	-5.22701	20	29	8	3UTR		0	0
hsa-miR-1291	XM_006719111	LMO3	(((((((((((.((((........&)))).))))))))))).	2536	2553	1	-25.1	1	0.00051557	0.662	0	0	-7.28438	15	17	11	3UTR		0	0
hsa-miR-1291	XM_006720601	DNAJA4	(.((((((((((.(((((((((((&)))))))))))............................))))....)))))).).	2080	2136	1	-25.3	1	0.00191503	0.441	0	0	-6.39038	22	56	11	3UTR		0	1
hsa-miR-1291	XM_006720953	ATF7IP2	((((..((((((.((.(((((...&)))))..)).))))))...)))).	2701	2725	1	-22.9	1	0.152675	0.529	0	0	-11.4798	17	24	6	3UTR		0	0
hsa-miR-1291	XM_006720953	ATF7IP2	((((.((((..((((..(((((((&)))))))))))..))))...................)))).	2375	2416	1	-20.2	1	1.20895e-05	0.559	0	0	-12.3569	19	41	11	3UTR		0	0
hsa-miR-1291	XM_006721612	KIAA0753	.(((((((..(((.((((((((((&))).)))))))...)))))))))).	3121	3146	1	-29.3	1	2.54654e-06	0.441	0	0	-6.94906	20	25	10	3UTR		0	0
hsa-miR-1291	XM_006722609	APC2	.((((((((.(((.((.((((...&)))))).)))..)))))))).	8674	8695	1	-27	1	0.000192135	0.368	0	0	-5.89267	17	21	8	3UTR		0	1
hsa-miR-1291	XM_006723381	ZNF329	.(.(((((.((((((.((......&.))))))))))))).).	2444	2506	1	-20.3	1	3.50355e-05	0.603	0	0	-6.6403	14	17	13	3UTR		0	0
hsa-miR-1291	XM_006724002	KCNJ15	(((((((.((((..((((.((((.&))))..))))))))))))))).	4386	4408	1	-23.8	1	2.14196e-07	0.515	0	0	-8.39718	19	22	15	3UTR		0	0
hsa-miR-1291	XM_006724504	NLGN4X	(((((((.(((((((.(.(((...&))).).)))))))))))))).	4238	4259	1	-22.2	1	1.31835e-08	0.529	0	0	-6.48426	18	21	14	3UTR		0	0
hsa-miR-1291	XM_006724507	RPS6KA3	((((((((((........((((((&)))))))))))))))).	5722	5739	1	-23.1	1	0.000430323	0.441	0	0	-13.2236	16	17	16	3UTR		0	0
hsa-miR-1291	XM_006724730	FAM122B	..(((((.(((((((....(((((&)))))))).)))).))))).	3009	3029	1	-21.6	1	4.98828e-06	0.632	0	0	-7.50368	17	20	8	3UTR		0	0
hsa-miR-1291	XM_011509328	NFASC	((((((((.((.....((((((..&)))))))))))))))).	7813	7830	1	-26.3	1	5.74351e-05	0.397	0	0	-11.4552	16	17	16	3UTR		0	1
hsa-miR-1291	XM_011509708	MSTO1	.(((((((.(((((((..(((...&)))..))))))).)))..)))).	2630	2653	1	-21.2	1	0.00181331	0.471	0	0	-4.84971	17	23	7	3UTR		0	0
hsa-miR-1291	XM_011510976	GPC1	..((((((((((..(((((.(((.&)))..)))))..)))))))))).	3453	3476	1	-28.5	1	2.72555e-08	0.368	0	0	-7.10297	18	23	10	3UTR		0	0
hsa-miR-1291	XM_011510978	GPD2	(.(((((((((.....(((((((.&)))))))))))))))).).	4765	4784	1	-25	1	0.000281327	0.559	0	0	-11.5625	17	19	16	3UTR		0	0
hsa-miR-1291	XM_011512041	AGPS	((((((((.((((((((..((...&))..)))))))).))).))))).	6503	6526	1	-22.9	1	0.00358814	0.574	0	0	-4.99396	18	23	8	3UTR		0	0
hsa-miR-1291	XM_011512041	AGPS	.((((((((((((((..(((.(((&)))))).)))))))))))))).	5230	5252	1	-21.5	1	0.000303739	0.676	0	0	-4.02637	20	22	14	3UTR		0	0
hsa-miR-1291	XM_011512169	STK17B	(((((((((.(((..((((((((.&)))))).........))..)))..))))).)))).	3046	3081	1	-21.9	1	0.000827308	0.691	0	0	-6.77237	20	35	6	3UTR		0	0
hsa-miR-1291	XM_011512175	GPR55	(((((((..(((..((.((((.((&)).)))).))..))).))))))).	4103	4127	1	-25.8	1	1.91138e-07	0.382	0	0	-9.45357	18	24	7	3UTR		0	0
hsa-miR-1291	XM_011512175	GPR55	.(((..(((((.(((((((((((.&)))))))))..................)).))))).))).	2722	2762	1	-25.5	1	0.00554748	0.471	0	0	-13.1601	19	40	9	3UTR		0	0
hsa-miR-1291	XM_011512619	ZDHHC23	.(((((.((((..((((..(((((&)))))...)))).))))))))).	4340	4363	1	-23.4	1	0.000113704	0.529	0	0	-9.97295	18	23	9	3UTR		0	0
hsa-miR-1291	XM_011512619	ZDHHC23	(((((((....((.((((((....&)))))).))....))))))).	2976	2997	1	-22.3	1	1.32153e-05	0.544	0	0	-12.2317	15	21	7	3UTR		0	0
hsa-miR-1291	XM_011512632	ARMC8	.((((..(((((.((.(((((...&))))))).))))))))).	2946	2964	1	-20.4	1	4.26291e-06	0.647	0	0	-8.76015	16	18	9	3UTR		0	0
hsa-miR-1291	XM_011512671	UBXN7	.((((((((((((....((((((.&))))))))))))))))..)).	10065	10086	1	-22.4	1	0.000845281	0.559	0	0	-5.61866	18	21	16	3UTR		0	0
hsa-miR-1291	XM_011513235	CHCHD6	.((((((((((..(((((((((((&))))))))))))))))...................))))).	1451	1492	1	-30.5	1	1.56033e-06	0.441	0	0	-8.42926	21	41	16	3UTR		0	0
hsa-miR-1291	XM_011513998	FBXL7	((((((((((((.((.((((((((&))))))..)).)).)))..............)))).))))).	2161	2203	1	-24.3	1	0.00131502	0.471	0	0	-5.45975	22	42	6	3UTR		0	0
hsa-miR-1291	XM_011514249	FARS2	...((((((.(((.((((.(((((&)))))..)))).))))))).)).	1999	2022	1	-23.7	1	0.00854894	0.426	0	0	-8.61389	18	23	7	3UTR		0	0
hsa-miR-1291	XM_011514862	ZSCAN26	(((((((((((((((((((((...&.))))))...)))))).........))))))))).	2465	2514	1	-28.6	1	0.000364711	0.574	0	0	-3.93757	21	35	9	3UTR		0	0
hsa-miR-1291	XM_011515316	GRB10	.(((((((.(((....((((((((&))))))).)....)))))))))).	2263	2287	1	-27	1	4.31141e-06	0.426	0	0	-7.96418	18	24	10	3UTR		0	0
hsa-miR-1291	XM_011515477	TNS3	.(((((((.((((((((...(((.&)))..))))))))))).)))).	6674	6696	1	-24.6	1	0.000317083	0.515	0	0	-4.84971	18	22	11	3UTR		0	0
hsa-miR-1291	XM_011515921	ELAPOR2	.((((((((((((((((.(((((.&)))))...))))).))).........)))))))).	3189	3224	1	-21.9	1	0.00136939	0.574	0	0	-3.79332	21	35	8	3UTR		0	0
hsa-miR-1291	XM_011516020	OR2F1	..(((((((.((((..((((((..&))))))...))))...))))))).	3060	3084	1	-23.9	1	0.0025101	0.588	0	0	-7.16801	17	24	7	3UTR		0	0
hsa-miR-1291	XM_011516666	SGCE	.((.((.(((..((.(((((((((&))))))))).))..)))...)).)).	3183	3209	1	-21.3	1	0.00610723	0.559	0	0	-15.2761	18	26	9	3UTR		0	0
hsa-miR-1291	XM_011517212	SDC2	((((.(.((.......((((((((&)))))))).....)).).)))).	2864	2887	1	-19.5	1	0.000114777	0.662	0	0	-20.1289	15	23	8	3UTR		0	0
hsa-miR-1291	XM_011519933	DUSP8	.((((((..(((((.(((.(((.(&).)))...))).))))).)))))).	2704	2729	1	-26.3	1	0.000442415	0.456	0	0	-7.8988	18	25	6	3UTR		0	0
hsa-miR-1291	XM_011520207	TCP11L1	.((((((((.((....(((((...&)))))..))..)))))))).	8008	8028	1	-26.2	1	1.77421e-06	0.529	0	0	-8.1503	15	20	8	3UTR		0	0
hsa-miR-1291	XM_011520285	SLC1A2	.(((((((..((((((((((.((.&)).))))))))))..))))))).	7898	7921	1	-28.6	1	0.000389647	0.632	0	0	-6.09222	19	23	10	3UTR		0	0
hsa-miR-1291	XM_011520285	SLC1A2	.((((((((....(((((.((((.&))))..))))).....)))))))).	4887	4912	1	-25.5	1	0.000132325	0.574	0	0	-12.4965	17	25	8	3UTR		0	0
hsa-miR-1291	XM_011520337	TSPAN4	((((((((.(((.(((((((....&))))).)).))).)))))))).	1535	1557	1	-27.5	1	4.76992e-07	0.324	0	0	-6.28309	18	22	8	3UTR		0	0
hsa-miR-1291	XM_011520459	TSPAN18	((((((((.((((((...((((((&.)))))).....))))))..)))))))).	1628	1675	1	-28.8	1	8.01829e-06	0.397	0	0	-5.22701	20	29	8	3UTR		0	0
hsa-miR-1291	XM_011520763	LMO3	(((((((((((.((((........&)))).))))))))))).	2291	2308	1	-25.1	1	0.00051557	0.662	0	0	-7.28438	15	17	11	3UTR		0	0
hsa-miR-1291	XM_011520997	WNK1	.((((((((((((((((.(((...&))).))))))).)))))))..)).	10707	10731	1	-23.3	1	0.000309563	0.529	0	0	-3.79332	19	24	7	3UTR		0	0
hsa-miR-1291	XM_011521005	WNK1	.((((((((((((((((.(((...&))).))))))).)))))))..)).	9186	9210	1	-23.3	1	0.000309563	0.529	0	0	-3.79332	19	24	7	3UTR		0	0
hsa-miR-1291	XM_011521369	BAHD1	((.((((((((.....((((((.(&).)))))).....)))))))).)).	3216	3241	1	-26.6	1	0.00684771	0.426	0	0	-11.9564	17	25	8	3UTR		0	0
hsa-miR-1291	XM_011521623	MYO9A	..(((((.((((..(.(((((((.&)))).))))..))))))))).	8262	8283	1	-24.1	1	0.000866929	0.485	0	0	-9.64966	17	21	9	3UTR		0	0
hsa-miR-1291	XM_011521856	RAB27A	...((((((((...(((((.(((.&.)))..)))))........)))))))).	1509	1542	1	-21.6	1	2.68831e-05	0.588	0	0	-12.0073	16	28	8	3UTR		0	0
hsa-miR-1291	XM_011521856	RAB27A	..(((((.((((....(((((...&)))))...)))).).)))).	2719	2739	1	-21.3	1	0.000179197	0.5	0	0	-10.3851	14	20	5	3UTR		0	0
hsa-miR-1291	XM_011522882	CMTM4	(((((((((((...((((..((((&))))..))))..))))))))))).	2296	2320	1	-26.8	1	0.0124336	0.412	0	0	-9.43035	19	24	11	3UTR		0	0
hsa-miR-1291	XM_011523030	CES4A	(((.((((((((.....(((((((&))))))).....))))))))))).	1877	1901	1	-23.9	1	0.000115555	0.456	0	0	-10.0841	18	24	11	3UTR		0	0
hsa-miR-1291	XM_011523279	SIAH1	(((((((((((..(((((((((..&))).))))))..)))........))))).))).	8001	8034	1	-24	1	4.11213e-05	0.5	0	0	-8.57351	20	33	6	3UTR		0	0
hsa-miR-1291	XM_011523284	MTHFSD	.(((((((((((....((((((((&)))))))))))))........................)))))).	1368	1412	1	-28.1	1	0.0010748	0.368	0	0	-6.90779	19	44	13	3UTR		0	0
hsa-miR-1291	XM_011523480	VPS9D1	..((((((((.....((((((.((&)).)))))))))))))).	2442	2460	1	-24.1	1	4.41367e-05	0.309	0	0	-14.01	16	18	14	3UTR		0	0
hsa-miR-1291	XM_011524044	GAS7	(((((.((((((((((((((.(((&)))..)))))))).))))))..).)))).	2940	2969	1	-24.6	1	0.000144389	0.632	0	0	-5.83853	22	29	8	3UTR		0	0
hsa-miR-1291	XM_011524428	ANKFN1	(((((((((((((((((((((...&.))))))))..))....))))))))))).	5315	5358	1	-28.6	1	0.00401656	0.544	0	0	-3.93757	21	29	11	3UTR		0	0
hsa-miR-1291	XM_011524440	RETREG3	((((((...((((.((.((((((.&)))))).)).)))))))))).	3055	3076	1	-25.1	1	0.000122397	0.426	0	0	-9.70813	18	21	10	3UTR		0	0
hsa-miR-1291	XM_011524490	SAMD14	.((((((((..(.(((((......&.)))))..)..)))))))).	1496	1549	1	-25.2	1	8.37609e-05	0.426	0	0	-9.14974	14	20	8	3UTR		0	1
hsa-miR-1291	XM_011524697	SNX11	.(((...((((((((.(((((...&)))))))))))))...))).	1357	1377	1	-24.9	1	0.000157543	0.515	0	0	-11.5901	16	20	13	3UTR		0	0
hsa-miR-1291	XM_011525844	DCC	.(((((((((((....(.((((((&)))))).)..)))))).))))).	4107	4130	1	-25.1	1	0.0131886	0.574	0	0	-6.90779	18	23	6	3UTR		0	0
hsa-miR-1291	XM_011525892	PIGN	..((((((((((((((((((..((&.)).))))))))......)))))))))).	3682	3740	1	-25.9	1	0.0194987	0.647	0	0	-4.957	20	29	10	3UTR		0	0
hsa-miR-1291	XM_011525893	PIGN	..((((((((((((((((((..((&.)).))))))))......)))))))))).	3633	3691	1	-25.9	1	0.0194987	0.647	0	0	-4.957	20	29	10	3UTR		0	0
hsa-miR-1291	XM_011525895	PIGN	..((((((((((((((((((..((&.)).))))))))......)))))))))).	3542	3600	1	-25.9	1	0.0194987	0.647	0	0	-4.957	20	29	10	3UTR		0	0
hsa-miR-1291	XM_011525896	PIGN	..((((((((((((((((((..((&.)).))))))))......)))))))))).	3688	3746	1	-25.9	1	0.0194987	0.647	0	0	-4.957	20	29	10	3UTR		0	0
hsa-miR-1291	XM_011525910	ZNF521	.(((((((((((..(.((((((((&)))))))))))))).........)))))).	7665	7695	1	-27.2	1	0.000202215	0.441	0	0	-6.17234	20	30	14	3UTR		0	0
hsa-miR-1291	XM_011526175	CCDC102B	((.((((.(((((((.........&.))))))).)))).)).	2243	2277	1	-21	1	3.31065e-06	0.529	0	0	-8.0418	13	17	7	3UTR		0	0
hsa-miR-1291	XM_011526249	SERPINB12	.(((((((.(((((((((.((((.&.))))..)))))))............)).))))))).	1835	1888	1	-25.7	1	0.000898828	0.515	0	0	-4.84971	20	37	7	3UTR		0	0
hsa-miR-1291	XM_011526614	AKT2	.((((((((((..((.((.(((((&))))).)).))...)))))))))).	2102	2127	1	-28.4	1	9.8212e-06	0.353	0	0	-8.66231	19	25	10	3UTR		0	1
hsa-miR-1291	XM_011527092	ZNF701	((((((.(((((((((((.((...&))..))))))))))).).))))).	2284	2308	1	-27.1	1	0.0178154	0.574	0	0	-5.48126	19	24	11	3UTR		0	0
hsa-miR-1291	XM_011527092	ZNF701	(((((((.((((((((((......&)))))).....))))))))))).	3285	3308	1	-24.8	1	0.000144337	0.412	0	0	-6.25121	17	23	11	3UTR		0	0
hsa-miR-1291	XM_011527840	ARHGEF18	((((((((((((..((((.((((.&))))..))))..)))).....)))))))).	3398	3428	1	-25.1	1	0.000558796	0.574	0	0	-6.08354	20	30	8	3UTR		0	0
hsa-miR-1291	XM_011528163	WIZ	.((((((..(((((((((((((((&)))))))).)))))))..............)))))).	4253	4290	1	-28	1	0.000143497	0.368	0	0	-7.16335	21	37	8	3UTR		0	0
hsa-miR-1291	XM_011528604	COMMD7	.((((((...((.((.(((((((.&))))))))).)).)))))).	1257	1277	1	-26.7	1	5.2132e-07	0.397	0	0	-9.92804	17	20	9	3UTR		0	0
hsa-miR-1291	XM_011528673	EPB41L1	.(((((((((((...(((((....&))))).....))))))))))).	6127	6149	1	-30.1	1	5.81946e-06	0.382	0	0	-6.67474	16	22	11	3UTR		0	1
hsa-miR-1291	XM_011528811	KCNQ2	.(((((((((((..((((((((((&)))..))).)))).....))))))))).)).	6904	6935	1	-27.8	1	0.000112219	0.382	0	0	-5.9393	21	31	9	3UTR		0	0
hsa-miR-1291	XM_011528831	SLC35C2	.((.((((.((.((((((((((..&)).)))))))).)).)))))).	2164	2186	1	-24.3	1	0.000593324	0.515	0	0	-11.2285	18	22	8	3UTR		0	0
hsa-miR-1291	XM_011529101	CBFA2T2	.(((((.((((((((.(((((((.&)))))))...)))))))).))).)).	2656	2682	1	-27.8	1	0.00370528	0.632	0	0	-5.57006	20	26	8	3UTR		0	0
hsa-miR-1291	XM_011529561	KCNJ15	(((((((.((((..((((.((((.&))))..))))))))))))))).	2459	2481	1	-23.8	1	2.14196e-07	0.515	0	0	-8.39718	19	22	15	3UTR		0	0
hsa-miR-1291	XM_011530017	KIAA0930	((((((((.(((((((.(.((...&.)).).)))))))))).))))).	5462	5502	1	-26.4	1	3.73004e-06	0.382	0	0	-4.99396	18	23	10	3UTR		0	0
hsa-miR-1291	XM_011530556	PPM1F	.(((((((.((.....(((((...&)))))...))))))))).	4259	4277	1	-26.7	1	0.00103256	0.441	0	0	-11.311	14	18	9	3UTR	MIRT654856	0	1
hsa-miR-1291	XM_011531430	NLGN4Y	(((((((.(((((((.(.(((...&))).).)))))))))))))).	4032	4053	1	-22.2	1	9.41234e-09	0.529	0	0	-6.48426	18	21	14	3UTR		0	0
hsa-miR-1291	XM_011531616	ASB5	.((((((((...(((((..(((..&)))..))))).....)))))))).	2402	2426	1	-22.7	1	0.0116309	0.75	0	0	-11.2074	16	24	8	3UTR		0	1
hsa-miR-1291	XM_011531617	ASB5	.((((((((...(((((..(((..&)))..))))).....)))))))).	2986	3010	1	-22.7	1	0.0116309	0.75	0	0	-11.2074	16	24	8	3UTR		0	1
hsa-miR-1291	XM_011531783	TMEM131L	(((.((((((.((.((.((((...&)))).)).)).))))))))).	5457	5478	1	-24.6	1	0.00036134	0.412	0	0	-10.6512	17	21	9	3UTR		0	0
hsa-miR-1291	XM_011531832	MFSD8	.((((((((((((((....((((.&))))....))))))).))))))).	2688	2712	1	-21.6	1	0.000179649	0.662	0	0	-4.02637	18	24	7	3UTR		0	0
hsa-miR-1291	XM_011532148	RNF150	.(((((((.((...(((((((...&.)))))))..))))))))).	6330	6360	1	-29	1	5.5111e-05	0.485	0	0	-10.3425	16	20	9	3UTR		0	0
hsa-miR-1291	XM_011532289	CAMK2D	.((((((((..((.((.(((.(((&))).))).)).)).)))))))).	2862	2885	1	-21.4	1	0.0526577	0.632	0	0	-8.71745	18	23	8	3UTR		0	0
hsa-miR-1291	XM_011533210	ARHGAP25	.((((((..(((((.(.(((((.(&).)))))).))))))))))).	1645	1666	1	-20.1	1	1.07624e-07	0.441	0	0	-7.8988	18	21	11	3UTR		0	0
hsa-miR-1291	XM_011533329	CISH	.((((((..(((.((((((((((.&))))).)))))..........)))..))).))).	4695	4729	1	-26.1	1	4.14718e-05	0.456	0	0	-8.45248	19	34	5	3UTR		0	0
hsa-miR-1291	XM_011533752	ATP2B2	....((((((.((((((((((.((&))))))))))))....)))))).	6609	6632	1	-24.8	1	0.00161118	0.515	0	0	-12.3713	18	23	12	3UTR		0	0
hsa-miR-1291	XM_011534249	ACTR8	(((((((((((.(((((((((...&))))))......))).)))).)))............)))).	6591	6632	1	-23.9	1	3.9048e-05	0.471	0	0	-7.28438	20	41	6	3UTR		0	0
hsa-miR-1291	XM_011534419	CPLX2	((((((.(((((..(((((((.((&)).)))))))))))).))).))).	3606	3630	1	-25.2	1	9.08065e-07	0.412	0	0	-7.62723	20	24	12	3UTR		0	1
hsa-miR-1291	XM_011535500	RNF217	.((((((..((((...(((((...&))))).)))))))))).	7243	7260	1	-23	1	0.00518451	0.618	0	0	-8.98869	15	17	10	3UTR		0	0
hsa-miR-1291	XM_011535818	LIN28B	.(((((((((((((((((((((((&))))))))))...))))))).......))).))).	4498	4533	1	-27.6	1	0.0173299	0.662	0	0	-3.79332	23	35	10	3UTR		0	0
hsa-miR-1291	XM_011535943	ECHDC1	..((((.((((...(((((((.((&.)))))))))...)))))))).	1003	1043	1	-23.3	1	0.000612474	0.529	0	0	-11.9935	17	22	9	3UTR		0	0
hsa-miR-1291	XM_011536111	PTP4A1	.(((((((.((.(((.(((.....&)))..))).)).))))))).	1041	1061	1	-20.8	1	0.00696022	0.618	0	0	-8.42957	15	20	7	3UTR		0	0
hsa-miR-1291	XM_011536116	EPM2A	..((((((((((.(((((......&)))))......)))))).)))).	1469	1492	1	-22.4	1	0.0032342	0.603	0	0	-6.24613	15	23	6	3UTR		0	0
hsa-miR-1291	XM_011536846	GNG2	.(((((((((((((((...((((.&.))))....))))))))))....))))).	1808	1888	1	-26.7	1	0.000173553	0.603	0	0	-3.79332	19	29	10	3UTR		0	0
hsa-miR-1291	XM_011536908	EXD2	(((((((((((((((((((((...&)))))).)))............))))))))...)))).	3407	3445	1	-27	1	0.000459178	0.559	0	0	-3.93757	21	38	8	3UTR		0	0
hsa-miR-1291	XM_011536940	AP5M1	(((((((((((((((((((.(((.&.)))))))))))))))...............))))))).	11458	11516	1	-28.7	1	0.00482999	0.618	0	0	-3.93757	22	39	15	3UTR		0	0
hsa-miR-1291	XM_011537007	GALNT16	.(((((((.((.....(((((((.&)))))))....))))))))).	2001	2022	1	-27.9	1	0.000872898	0.426	0	0	-11.311	16	21	9	3UTR		0	1
hsa-miR-1291	XM_011537732	CDK2	.((((((((..((((..(((((..&)))))...)))).)))))))).	2066	2088	1	-23.6	1	0.000203245	0.588	0	0	-8.09365	17	22	8	3UTR		0	0
hsa-miR-1291	XM_011537946	PRICKLE1	...(((((((((((((((((((((&))))))..))))))).))))....)))).	2856	2885	1	-25.9	1	6.72203e-05	0.515	0	0	-6.51454	21	29	7	3UTR		0	0
hsa-miR-1291	XM_011537947	PRICKLE1	...(((((((((((((((((((((&))))))..))))))).))))....)))).	3087	3116	1	-25.9	1	6.72203e-05	0.515	0	0	-6.51454	21	29	7	3UTR		0	0
hsa-miR-1291	XM_011538238	RACGAP1	.(((((((((....((((((((..&))))))))...)))))).))).	2120	2142	1	-25.3	1	0.0017956	0.588	0	0	-12.1109	17	22	8	3UTR		0	0
hsa-miR-1291	XM_011538272	TAFA2	.(((((((.(((.((((((((.((&.)))))))))).)))..))).)))).	2202	2249	1	-23.5	1	0.00430785	0.529	0	0	-6.13885	20	26	10	3UTR		0	0
hsa-miR-1291	XM_011538272	TAFA2	(.(((((((..((((((((.((((&)))).)).......)))))).))))))).).	970	1001	1	-20.8	1	0.00202187	0.588	0	0	-9.16853	20	31	7	3UTR		0	0
hsa-miR-1291	XM_011539528	INPP5F	....((((((((((((((((.(((&))).))))....))).....))))))))).	4230	4260	1	-21.4	1	0.0099564	0.559	0	0	-9.54656	19	30	9	3UTR		0	0
hsa-miR-1291	XM_011539634	GFRA1	..((((.((((((((..(((.(((&)))..)))..)))))))).)))).	4592	4616	1	-25.1	1	9.86164e-06	0.5	0	0	-6.73374	18	24	8	3UTR		0	0
hsa-miR-1291	XM_011540268	DYDC2	.((.(((((((((((...(((((.&.)))))...)))))..)))))))).	1270	1311	1	-21.9	1	0.0142403	0.603	0	0	-7.0584	18	25	8	3UTR		0	0
hsa-miR-1291	XM_011540270	DYDC2	.((.(((((((((((...(((((.&.)))))...)))))..)))))))).	1117	1158	1	-21.9	1	0.0142403	0.603	0	0	-7.0584	18	25	8	3UTR		0	0
hsa-miR-1291	XM_011540626	MAB21L3	(((((((((((((.(((((.(((.&.)))..)))))..))))))))).)))).	1449	1491	1	-29.3	1	1.35649e-05	0.5	0	0	-4.79441	21	28	9	3UTR		0	0
hsa-miR-1291	XM_011541028	WDR47	....(((((((..(.((((((((.&)))))))).)........))))))).	3283	3309	1	-20.9	1	0.0018402	0.574	0	0	-14.9179	16	26	8	3UTR		0	0
hsa-miR-1291	XM_011541396	KCNA2	.((((((..((((((.(((.(((.&)))...)))))))))....)))))).	4339	4365	1	-24.6	1	8.28232e-05	0.471	0	0	-7.3964	18	26	9	3UTR		0	0
hsa-miR-1291	XM_011541399	KCNA2	.((((((..((((((.(((.(((.&)))...)))))))))....)))))).	4428	4454	1	-24.6	1	8.28232e-05	0.471	0	0	-7.3964	18	26	9	3UTR		0	0
hsa-miR-1291	XM_011541812	AMIGO1	.((((((((..(((((((((((..&))))))))))).)))))))).	3470	3491	1	-25.6	1	0.00175679	0.574	0	0	-7.86061	19	21	11	3UTR		0	0
hsa-miR-1291	XM_011541891	RHCE	(((((...(((((((((..(((((&.))))).....)))))))))..))))).	3256	3307	1	-27.8	1	0.0023222	0.526	0	0	-9.69585	19	28	9	3UTR		0	0
hsa-miR-1291	XM_011542091	LUZP1	.((((((((((((.((.(((....&)))))..))))))))).))).	8331	8352	1	-24	1	0.003888	0.544	0	0	-4.65016	17	21	9	3UTR		0	0
hsa-miR-1291	XM_011542232	ESPN	..((((((.(((..(((((((.((&.)))))))))...))).)))))).	4353	4384	1	-26	1	0.00122475	0.324	0	0	-8.15936	18	24	9	3UTR		0	0
hsa-miR-1291	XM_011543160	POC5	(((((((.....((((((((.((.&))))))))))....))))))).	1818	1840	1	-22.7	1	1.93461e-05	0.618	0	0	-14.7217	17	22	10	3UTR		0	0
hsa-miR-1291	XM_011543250	EFNA5	((((((((((....(.((((((..&)))))))..))))).))))).	4821	4842	1	-21.1	1	0.00362993	0.544	0	0	-12.4882	17	21	7	3UTR		0	0
hsa-miR-1291	XM_011543795	POTEB3	((((((......((((((.((...&)).)))))).......)))))).	1804	1827	1	-21.6	1	5.77487e-05	0.588	0	0	-16.2654	14	23	6	3UTR		0	0
hsa-miR-1291	XM_011544607	PLEKHA2	..((((((((((.((....(((((&))))).)).)))))))))).	2383	2403	1	-24.4	1	0.000314236	0.515	0	0	-6.47918	17	20	10	3UTR		0	0
hsa-miR-1291	XM_011544607	PLEKHA2	.((((((((((((((((.......&)))))))))).))).))).	1817	1836	1	-24	1	0.0181782	0.588	0	0	-3.79332	16	19	10	3UTR		0	0
hsa-miR-1291	XM_011545152	ACER3	.((((.((((((((.((((((((.&))))))).).))))).))).)))).	1008	1033	1	-26.5	1	0.000925209	0.515	0	0	-6.42973	20	25	7	3UTR		0	0
hsa-miR-1291	XM_011545315	PPFIA1	.((((...(((((((((.(((...&))).))))))))))))).	4692	4710	1	-23.7	1	0.00027639	0.456	0	0	-9.55161	16	18	13	3UTR		0	0
hsa-miR-1291	XM_011545563	RPS6KA3	((((((((((........((((((&)))))))))))))))).	5740	5757	1	-23.1	1	0.000430323	0.441	0	0	-13.2236	16	17	16	3UTR		0	0
hsa-miR-1291	XM_011546133	ADA2	(((((..(((.(((((((((.((.&)).)))))))))....)))...))))).	1903	1931	1	-20.8	1	0.00397061	0.559	0	0	-10.207	19	28	9	3UTR		0	0
hsa-miR-1291	XM_016999990	TTC34	.(((((((((((..((((((....&))))))....))))))))))).	2014	2036	1	-29.6	1	6.44821e-06	0.368	0	0	-5.9393	17	22	11	3UTR		0	0
hsa-miR-1291	XM_017000124	TDRKH	((((((((((((....(((((...&)))))....)))))))).....)))).	2150	2177	1	-25.7	1	0.000111297	0.544	0	0	-7.05204	17	27	8	3UTR		0	0
hsa-miR-1291	XM_017000144	GLMN	((((.(((((((.....((((((.&)))))))))))))..)))).	2117	2137	1	-19.4	1	0.00247203	0.632	0	0	-11.1711	17	20	13	3UTR		0	0
hsa-miR-1291	XM_017000154	CHRM3	((((((((((((.((...((((((&)))))).)).)))))))).)))).	7828	7852	1	-23.6	1	9.4599e-05	0.559	0	0	-5.45975	20	24	8	3UTR		0	0
hsa-miR-1291	XM_017000154	CHRM3	..(((((((((((...((......&))..))))))))))).	6144	6160	1	-23.6	1	0.000121211	0.5	0	0	-6.78234	13	16	11	3UTR		0	0
hsa-miR-1291	XM_017000417	FAM78B	(((.((((((((((((((.((...&))..)))...)))))))))))))).	2608	2633	1	-25.3	1	0.00548549	0.588	0	0	-6.9696	19	25	14	3UTR		0	0
hsa-miR-1291	XM_017001213	KCNA2	.((((((..((((((.(((.(((.&)))...)))))))))....)))))).	4320	4346	1	-24.6	1	8.28232e-05	0.471	0	0	-7.3964	18	26	9	3UTR		0	0
hsa-miR-1291	XM_017001280	FAM177B	.(((((((((((((((((((....&.)))))..))))))))..))).))).	3477	3535	1	-21.9	1	0.000111168	0.662	0	0	-3.79332	19	26	8	3UTR		0	0
hsa-miR-1291	XM_017001362	NFIA	.(((((.(((((....((((((.(&).))))))...)))))))))).	2023	2045	1	-20.7	1	0.0134312	0.603	0	0	-8.45148	17	22	10	3UTR		0	0
hsa-miR-1291	XM_017001363	NFIA	.((.((((((((((((.((((...&))))))).))))))))).)).	6930	6951	1	-27.9	1	0.000378042	0.529	0	0	-6.82535	18	21	9	3UTR		0	0
hsa-miR-1291	XM_017001812	TMEM234	.(((((((..(((((((((((((.&))).)))...)))))))..............))))))).	2091	2130	1	-25	1	0.00407105	0.412	0	0	-6.09222	20	39	7	3UTR		0	0
hsa-miR-1291	XM_017002262	PRDM2	.((((((.(((((((..((((((.&))))))))))))).)))))).	4837	4858	1	-33.5	1	2.69058e-06	0.338	0	0	-6.34001	19	21	13	3UTR		0	0
hsa-miR-1291	XM_017002373	KIAA0319L	.(((((((((((.(((........&))).))))))))))).	3916	3932	1	-24.3	1	0.00747452	0.544	0	0	-5.08246	14	16	11	3UTR		0	1
hsa-miR-1291	XM_017002417	SNX27	(((((..((((((((.(((((...&))))).)))))))).......))))).	6523	6550	1	-27.8	1	0.0373144	0.588	0	0	-7.61527	18	27	8	3UTR		0	0
hsa-miR-1291	XM_017002541	EFCAB2	(((((((..((....(((......&.)))...))..))))))).	3508	3545	1	-21.9	1	0.000524545	0.456	0	0	-13.5358	12	19	7	3UTR		0	0
hsa-miR-1291	XM_017003798	PTPN18	.(((.((((((....(((((((((&)))))))))..)))))).))).	1691	1713	1	-28	1	2.6353e-05	0.426	0	0	-14.1406	18	22	9	3UTR		0	0
hsa-miR-1291	XM_017004004	INPP5D	.((((((..(((((((((((.(((&.)))))).))))))))...)))))).	3734	3793	1	-27.3	1	4.12266e-06	0.485	0	0	-7.16335	20	26	8	3UTR		0	0
hsa-miR-1291	XM_017004072	PLEKHM3	..(((((((((((((.((((((((&))))))))...............))))))))).........................)))).	8355	8417	1	-24.8	1	0.00144052	0.5	0	0	-5.19005	21	62	9	3UTR		0	0
hsa-miR-1291	XM_017004328	VIT	..((((((.((.(((((.......&))))).)))))))).	2495	2510	1	-22.3	1	0.000124503	0.529	0	0	-9.36019	13	15	8	3UTR		0	0
hsa-miR-1291	XM_017004343	PRKAG3	.(((((((((((((..(((((((.&))).))))...................))))))))))))).	2376	2417	1	-29	1	0.000261317	0.426	0	0	-4.76182	20	41	13	3UTR		0	1
hsa-miR-1291	XM_017004452	TMEM127	.(((((((((((..(..(((((((&)))))))....)...))))).................)))))).	901	945	1	-24.8	1	0.0136709	0.426	0	0	-6.17234	19	44	7	3UTR		0	0
hsa-miR-1291	XM_017005170	VAMP8	..((((..((((...(((((((((&)))))))))...)))))))).	819	840	1	-23.6	1	0.000224925	0.5	0	0	-11.6957	17	21	9	3UTR		0	0
hsa-miR-1291	XM_017005795	GPR156	((((((((..(..((((((((...&))))))))..)..))).))))).	2966	2989	1	-25.5	1	0.000258059	0.485	0	0	-10.8724	17	23	8	3UTR		0	0
hsa-miR-1291	XM_017005871	USF3	((((((((((((((((((((((((&)))).....)))))))))))..................)))..........................)))))).	12282	12356	1	-25.1	1	0.00184579	0.5	0	0	-3.93757	24	74	11	3UTR		0	0
hsa-miR-1291	XM_017006272	GRM7	((((((((((((..((((((....&.))))))..)))...))))))))).	4233	4272	1	-23.4	1	0.000131515	0.529	0	0	-6.08354	18	25	9	3UTR		0	0
hsa-miR-1291	XM_017006386	TAFA1	((((.((((((((.((((.(((((&))))).).))).))))))))...)))).	2334	2362	1	-28.7	1	0.00503852	0.544	0	0	-8.91345	21	28	8	3UTR		0	0
hsa-miR-1291	XM_017006475	NKTR	.(((((((.(((.((((((((((.&.))))))).)))))).))).)))).	6572	6611	1	-26.2	1	4.64275e-05	0.412	0	0	-6.13885	20	25	7	3UTR		0	0
hsa-miR-1291	XM_017006475	NKTR	.(((((((((.((.(((((((...&))))).)).)).).)))))))).	6462	6485	1	-25.1	1	8.62904e-05	0.485	0	0	-7.47494	18	23	8	3UTR		0	0
hsa-miR-1291	XM_017006483	ATP2B2	....((((((.((((((((((.((&))))))))))))....)))))).	6543	6566	1	-24.8	1	0.00161118	0.515	0	0	-12.3713	18	23	12	3UTR		0	0
hsa-miR-1291	XM_017006487	ATP2B2	....((((((.((((((((((.((&))))))))))))....)))))).	6568	6591	1	-24.8	1	0.00161118	0.515	0	0	-12.3713	18	23	12	3UTR		0	0
hsa-miR-1291	XM_017006489	ATP2B2	....((((((.((((((((((.((&))))))))))))....)))))).	6770	6793	1	-24.8	1	0.00161118	0.515	0	0	-12.3713	18	23	12	3UTR		0	0
hsa-miR-1291	XM_017006554	CCDC174	.(((((((.((.(...(((((...&)))))...).))))))))).	2087	2107	1	-23.9	1	3.2233e-05	0.412	0	0	-10.0219	15	20	9	3UTR		0	0
hsa-miR-1291	XM_017006556	TIMMDC1	.((((((((((..(((((((((.(&.).)))))))..))..)))..))).)))).	759	797	1	-22.2	1	0.000227074	0.603	0	0	-8.42926	20	30	7	3UTR		0	0
hsa-miR-1291	XM_017006635	DCUN1D1	.(((((.((((((((((.(((...&.))).)))))).)))).))))).	1597	1630	1	-31	1	0.00261751	0.588	0	0	-5.33701	18	23	6	3UTR		0	0
hsa-miR-1291	XM_017007052	GORASP1	.(((((((.(((..((((((.(((&)))))))))...................)))))))))).	1490	1529	1	-25	1	0.000172987	0.426	0	0	-6.99569	19	39	10	3UTR		0	0
hsa-miR-1291	XM_017007120	NR2C2	.(((((((((((..(.((((((((&.)))))....)))).....))))))))))).	3120	3165	1	-26.7	1	0.000539787	0.397	0	0	-6.17234	20	31	11	3UTR		0	0
hsa-miR-1291	XM_017007529	SLC4A7	.((((((((......((((.....&))))......)))))))).	3010	3029	1	-19.2	1	0.00015673	0.618	0	0	-14.0888	12	19	8	3UTR		0	0
hsa-miR-1291	XM_017007944	TRIM2	.((((((((((((((.(((.((.(&).)).))).)))))))))).....)))).	4539	4568	1	-25.7	1	0.000816209	0.647	0	0	-4.02637	20	29	10	3UTR		0	0
hsa-miR-1291	XM_017007946	TRIM2	.((((((((((((((.(((.((.(&).)).))).)))))))))).....)))).	3856	3885	1	-25.7	1	0.000816209	0.647	0	0	-4.02637	20	29	10	3UTR		0	0
hsa-miR-1291	XM_017007947	TRIM2	.((((((((((((((.(((.((.(&).)).))).)))))))))).....)))).	3853	3882	1	-25.7	1	0.000816209	0.647	0	0	-4.02637	20	29	10	3UTR		0	0
hsa-miR-1291	XM_017007948	TRIM2	.((((((((((((((.(((.((.(&.).)).))).)))))))))).....)))).	3787	3835	1	-26	1	0.000816209	0.647	0	0	-4.02637	20	30	10	3UTR		0	0
hsa-miR-1291	XM_017007950	TRIM2	.((((((((((((((.(((.((.(&).)).))).)))))))))).....)))).	4259	4288	1	-25.7	1	0.000816209	0.647	0	0	-4.02637	20	29	10	3UTR		0	0
hsa-miR-1291	XM_017008476	RNF150	.(((((((.((...(((((((...&.)))))))..))))))))).	6221	6251	1	-29	1	5.5111e-05	0.485	0	0	-10.3425	16	20	9	3UTR		0	0
hsa-miR-1291	XM_017008693	QRFPR	.(((((((((((..(((((((((.&))))))..)))..)))))))).....))).	1324	1354	1	-24.9	1	8.30586e-05	0.485	0	0	-5.9393	20	30	8	3UTR		0	0
hsa-miR-1291	XM_017009469	SPINK14	(((((((((((((((.........&))))))))).)))))).	863	880	1	-22.3	1	0.0104531	0.588	0	0	-4.17062	15	17	9	3UTR		0	0
hsa-miR-1291	XM_017012067	GRB10	.(((((((.(((....((((((((&))))))).)....)))))))))).	2323	2347	1	-27	1	4.31141e-06	0.426	0	0	-7.96418	18	24	10	3UTR		0	0
hsa-miR-1291	XM_017012416	COA1	.(.(((((((..((((.((((...&))))..))))))))))).).	1057	1077	1	-23.2	1	2.74091e-05	0.485	0	0	-11.5224	16	20	11	3UTR		0	0
hsa-miR-1291	XM_017012594	CYREN	...(((((.((((((.(((((((.&))).))))))))))...))))).	1938	1961	1	-26.8	1	2.0914e-06	0.426	0	0	-7.80398	18	23	10	3UTR		0	0
hsa-miR-1291	XM_017012594	CYREN	(((((((..(((..((((..(((.&)))..)))).)))))))))).	5793	5814	1	-25.3	1	4.79827e-07	0.441	0	0	-9.45357	17	21	10	3UTR		0	0
hsa-miR-1291	XM_017012678	CALN1	.(((((((.((((((((((((...&.))))))))))))..))).......................)))).	3559	3616	1	-28.5	1	0.00050114	0.515	0	0	-4.84971	19	46	12	3UTR		0	0
hsa-miR-1291	XM_017012776	CCDC126	..((.(((.((.(((.((((((((&))))))))))).)).))).)).	930	952	1	-21.1	1	0.000260024	0.647	0	0	-13.7123	18	22	11	3UTR		0	0
hsa-miR-1291	XM_017012801	FOXP2	.((.(((((((((((((((.....&)))))))))))))....))..)).	5382	5406	1	-21.3	1	5.47094e-05	0.618	0	0	-6.82535	17	24	13	3UTR		0	0
hsa-miR-1291	XM_017013350	TRIQK	..((((((.(((((((((((((((&.))).))))))).................))))).)))))).	3052	3113	1	-25	1	0.0039948	0.691	0	0	-6.01339	21	42	7	3UTR		0	0
hsa-miR-1291	XM_017013467	ASAP1	(((((((((((((.((..((((((&)))))))).)))..)))))))).)).	5187	5213	1	-24.1	1	0.00178939	0.559	0	0	-4.79441	21	26	8	3UTR		0	0
hsa-miR-1291	XM_017013603	NTAQ1	((((((((...((.(((..((((.&))))..))).)))))))))).	3108	3129	1	-23.3	1	0.000162826	0.471	0	0	-9.91808	17	21	10	3UTR		0	0
hsa-miR-1291	XM_017013719	PLEKHA2	..((((((((((.((....(((((&))))).)).)))))))))).	2206	2226	1	-24.4	1	0.000314236	0.515	0	0	-6.47918	17	20	10	3UTR		0	0
hsa-miR-1291	XM_017013719	PLEKHA2	.((((((((((((((((.......&)))))))))).))).))).	1640	1659	1	-24	1	0.0181782	0.588	0	0	-3.79332	16	19	10	3UTR		0	0
hsa-miR-1291	XM_017013861	TUSC3	.((((.((((((((((........&)))))))))).)))).	1655	1671	1	-21.1	1	4.72301e-05	0.515	0	0	-5.69428	14	16	10	3UTR		0	0
hsa-miR-1291	XM_017013888	SHARPIN	(((((((..((...((((......&))))...))..))))))).	1724	1743	1	-23.5	1	0.00162832	0.485	0	0	-12.8004	13	19	7	3UTR		0	0
hsa-miR-1291	XM_017014199	SEMA4D	.(((((...(((...(((((((((&)))))))))..)))..))))).	6034	6056	1	-27.8	1	2.45033e-06	0.382	0	0	-11.5885	17	22	9	3UTR		0	0
hsa-miR-1291	XM_017014447	ANKS6	(((((((..((((.(.(((((((.&)))))))).)))).................)).))))).	1510	1549	1	-23.3	1	0.000194313	0.382	0	0	-8.39749	19	39	8	3UTR		0	0
hsa-miR-1291	XM_017014561	CDK20	.((((.((((((.....((((((.&)))))).)))))).)))).	1576	1595	1	-24.8	1	1.38536e-05	0.441	0	0	-8.80875	16	19	6	3UTR		0	0
hsa-miR-1291	XM_017014665	ST6GALNAC6	.(((((((((((.(((((((((((&))).)))))....)))..)))....)))))))).	1274	1308	1	-27.8	1	0.000103251	0.441	0	0	-5.08246	22	34	8	3UTR		0	1
hsa-miR-1291	XM_017015185	FSD1L	.((((((((((..(((...((((.&))))..)))..)))))))))).	6576	6598	1	-21.1	1	0.0013545	0.529	0	0	-8.42926	17	22	10	3UTR		0	0
hsa-miR-1291	XM_017015235	AOPEP	((..((((.(((..(((((((...&))))))).))).))))..)).	2666	2687	1	-24.3	1	0.000298721	0.441	0	0	-11.7295	16	21	7	3UTR		0	0
hsa-miR-1291	XM_017015253	MPDZ	.(((((.(.(((((.(.(((((..&)))))).)))))).))))).	6267	6287	1	-23.4	1	0.00536188	0.559	0	0	-7.12885	17	20	6	3UTR		0	0
hsa-miR-1291	XM_017016317	WAC	((((.((((((((((.........&)))))))))).)).)).	2784	2801	1	-19.2	1	0.0275982	0.662	0	0	-8.28966	14	17	10	3UTR		0	0
hsa-miR-1291	XM_017016383	RNLS	.((((((.((((.((....(((((&)))))....)))))))))))).	4846	4868	1	-22.5	1	7.04489e-05	0.529	0	0	-7.62914	17	22	12	3UTR		0	0
hsa-miR-1291	XM_017016713	TSPAN14	.(((((((((.(((((((((....&)))))).....)))..))))))))).	2224	2250	1	-26.6	1	0.00042726	0.485	0	0	-6.6181	18	26	9	3UTR		0	0
hsa-miR-1291	XM_017017296	DRD2	.((((((((((.(...(((((((.&.)))))))....).)))))))))).	1727	1773	1	-31.9	1	4.38499e-07	0.412	0	0	-8.96547	18	25	10	3UTR		0	0
hsa-miR-1291	XM_017017310	MARK2	((((((((.(((.(((((((((((&))))))))))).)))..)))))))).	3742	3768	1	-37.6	1	1.29908e-06	0.338	0	0	-6.28309	22	26	11	3UTR		0	0
hsa-miR-1291	XM_017017555	DKK3	((((((((.((((...((((((.(&).)))).)).....)))).)))))))).	1338	1366	1	-24.1	1	0.00840372	0.426	0	0	-6.8193	19	28	8	3UTR		0	0
hsa-miR-1291	XM_017018136	SLC1A2	.(((((((..((((((((((.((.&)).))))))))))..))))))).	8681	8704	1	-28.6	1	0.000389647	0.632	0	0	-6.09222	19	23	10	3UTR		0	0
hsa-miR-1291	XM_017018136	SLC1A2	.((((((((....(((((.((((.&))))..))))).....)))))))).	5670	5695	1	-25.5	1	0.000132325	0.574	0	0	-12.4965	17	25	8	3UTR		0	0
hsa-miR-1291	XM_017018137	SLC1A2	.(((((((..((((((((((.((.&)).))))))))))..))))))).	7901	7924	1	-28.6	1	0.000389647	0.632	0	0	-6.09222	19	23	10	3UTR		0	0
hsa-miR-1291	XM_017018137	SLC1A2	.((((((((....(((((.((((.&))))..))))).....)))))))).	4890	4915	1	-25.5	1	0.000132325	0.574	0	0	-12.4965	17	25	8	3UTR		0	0
hsa-miR-1291	XM_017018138	SLC1A2	.(((((((..((((((((((.((.&)).))))))))))..))))))).	7885	7908	1	-28.6	1	0.000389647	0.632	0	0	-6.09222	19	23	10	3UTR		0	0
hsa-miR-1291	XM_017018138	SLC1A2	.((((((((....(((((.((((.&))))..))))).....)))))))).	4874	4899	1	-25.5	1	0.000132325	0.574	0	0	-12.4965	17	25	8	3UTR		0	0
hsa-miR-1291	XM_017018139	SLC1A2	.(((((((..((((((((((.((.&)).))))))))))..))))))).	7926	7949	1	-28.6	1	0.000389647	0.632	0	0	-6.09222	19	23	10	3UTR		0	0
hsa-miR-1291	XM_017018139	SLC1A2	.((((((((....(((((.((((.&))))..))))).....)))))))).	4915	4940	1	-25.5	1	0.000132325	0.574	0	0	-12.4965	17	25	8	3UTR		0	0
hsa-miR-1291	XM_017018188	STX3	(((((((((((((((.((.((((.&)))).)).))...))))))))))....))).	2163	2194	1	-24.5	1	0.000147566	0.441	0	0	-4.17062	21	31	10	3UTR		0	0
hsa-miR-1291	XM_017018188	STX3	.((((((.(((((((((((.((((&)))).))...........)))))))).).))..............)))).	909	959	1	-21.6	1	0.000182843	0.471	0	0	-6.10696	21	50	8	3UTR		0	0
hsa-miR-1291	XM_017018195	STX3	(((((((((((((((.((.((((.&)))).)).))...))))))))))....))).	2052	2083	1	-24.5	1	0.000147566	0.441	0	0	-4.17062	21	31	10	3UTR		0	0
hsa-miR-1291	XM_017018195	STX3	.((((((.(((((((((((.((((&)))).))...........)))))))).).))..............)))).	798	848	1	-21.6	1	0.000182843	0.471	0	0	-6.10696	21	50	8	3UTR		0	0
hsa-miR-1291	XM_017018287	RIC3	...(((((((((((((((((.(((&))).))))))))))))...))).)).	1967	1993	1	-24.4	1	0.00061191	0.529	0	0	-6.51454	20	26	12	3UTR		0	0
hsa-miR-1291	XM_017018720	ERP29	..(((((((((.(((.(((((((.&))))))))).).))))................))))).	828	866	1	-23.7	1	0.00111668	0.485	0	0	-8.53685	19	38	9	3UTR		0	0
hsa-miR-1291	XM_017019175	FBXW8	.((((((..(((((((..(((((.&)))))..)))))))..)))))).	3097	3120	1	-22.4	1	0.0331922	0.544	0	0	-7.16335	18	23	7	3UTR		0	0
hsa-miR-1291	XM_017019280	C12orf42	.((((((...((((((...(((((&)))))...))))))...........................)))))).	1709	1757	1	-22.2	1	0.0208106	0.544	0	0	-8.40586	17	48	6	3UTR		0	0
hsa-miR-1291	XM_017019297	C12orf76	(((((((((((..((.........&))..))))))))))).	981	997	1	-22	1	8.38463e-05	0.456	0	0	-8.80656	13	16	11	3UTR		0	0
hsa-miR-1291	XM_017019761	SINHCAF	..((((((((((((((((((((((&))))).))..))))))))))........................))))).	1612	1662	1	-21.6	1	0.000243365	0.618	0	0	-4.957	22	50	10	3UTR		0	0
hsa-miR-1291	XM_017020848	DCLK1	.(((((((((.(((((((((((..&.))))).).))))))).))))))).	1560	1590	1	-25	1	0.000329557	0.574	0	0	-6.6181	20	25	7	3UTR		0	0
hsa-miR-1291	XM_017021363	EVL	(((((((((((...(((((.((((&)))))))))....................))).)))))))).	2830	2872	1	-26.6	1	4.38064e-06	0.353	0	0	-9.43035	20	42	9	3UTR		0	0
hsa-miR-1291	XM_017021376	GNG2	.(((((((((((((((...((((.&.))))....))))))))))....))))).	2601	2652	1	-26.7	1	0.000173553	0.603	0	0	-3.79332	19	29	10	3UTR		0	0
hsa-miR-1291	XM_017021377	GNG2	.(((((((((((((((...((((.&.))))....))))))))))....))))).	2509	2589	1	-26.7	1	0.000173553	0.603	0	0	-3.79332	19	29	10	3UTR		0	0
hsa-miR-1291	XM_017021421	EXD2	(((((((((((((((((((((...&)))))).)))............))))))))...)))).	3354	3392	1	-27	1	0.000459178	0.559	0	0	-3.93757	21	38	8	3UTR		0	0
hsa-miR-1291	XM_017021440	TDP1	.(((((((((((..((((......&))))...))))...))))))).	2969	2991	1	-21.2	1	6.88755e-06	0.471	0	0	-5.9393	15	22	7	3UTR		0	0
hsa-miR-1291	XM_017021787	TRIP11	..((((((((.....(((.(((((&))))).))))))))).)).	6504	6523	1	-21.7	1	2.53273e-06	0.632	0	0	-14.01	16	19	9	3UTR		0	0
hsa-miR-1291	XM_017021870	ARPP19	((((......(.((((((((((((&)))))))))))).)..)))).	4770	4791	1	-24.5	1	0.00161488	0.676	0	0	-19.4606	17	21	12	3UTR		0	0
hsa-miR-1291	XM_017022254	NTRK3	(((((((.((((.....(((((((&)))))))..........))))))))))).	4732	4761	1	-24.5	1	9.74535e-06	0.397	0	0	-9.36568	18	29	11	3UTR		0	0
hsa-miR-1291	XM_017022283	SCAPER	..((((((((((.(((((((....&))))))))))))....))))).	4170	4192	1	-27.3	1	1.62827e-05	0.397	0	0	-6.24613	17	22	12	3UTR		0	0
hsa-miR-1291	XM_017022378	DPP8	.(((((((.(((.((.((((((.(&).)))))).)).))).)))).))).	6456	6481	1	-24.7	1	8.43973e-05	0.544	0	0	-6.37189	19	25	6	3UTR		0	0
hsa-miR-1291	XM_017022394	UACA	.(((((.((...((((((((.(((&))).).))))))))).))))).	4437	4459	1	-22.1	1	3.06849e-05	0.647	0	0	-12.7511	18	22	9	3UTR		0	0
hsa-miR-1291	XM_017022419	DTWD1	(((((........((.(((((((.&)))))))))........))))).	1495	1518	1	-20.1	1	0.00210648	0.647	0	0	-19.6885	14	23	9	3UTR		0	0
hsa-miR-1291	XM_017023106	KCTD13	(((((.((.(((((..((((((.(&).))))))..))))).)).).)))).	2491	2517	1	-25.7	1	3.85498e-06	0.441	0	0	-7.86342	19	26	6	3UTR		0	0
hsa-miR-1291	XM_017023651	TVP23A	(((((..(((((((.(((((((..&))))))).)...))))))......................))))).	2782	2828	1	-25.4	1	0.00116469	0.441	0	0	-8.11767	19	46	7	3UTR		0	0
hsa-miR-1291	XM_017023666	ZNF768	(.(((((((((.((((.(((((((&)))))))....)))...).))))))).)).).	1971	2003	1	-25	1	0.00522642	0.426	0	0	-8.44805	21	32	7	3UTR		0	0
hsa-miR-1291	XM_017023711	ATF7IP2	((((..((((((.((.(((((...&)))))..)).))))))...)))).	1441	1465	1	-22.9	1	0.152675	0.529	0	0	-11.4798	17	24	6	3UTR		0	0
hsa-miR-1291	XM_017023711	ATF7IP2	((((.((((..((((..(((((((&)))))))))))..))))...................)))).	1115	1156	1	-20.2	1	1.20895e-05	0.559	0	0	-12.3569	19	41	11	3UTR		0	0
hsa-miR-1291	XM_017023793	ZNRF1	((((.(((.((((((..((((((.&))))))))))))))).)))).	1966	1987	1	-23.7	1	1.30518e-06	0.353	0	0	-9.34605	19	21	15	3UTR		0	0
hsa-miR-1291	XM_017023889	ZNF276	(((((((..((((((.(((.(((.&))).)))))))))..........))))))).	4487	4518	1	-25.4	1	0.00307542	0.478	0	0	-7.54065	19	31	9	3UTR		0	0
hsa-miR-1291	XM_017024322	SAMD14	.((((((((..(.(((((......&.)))))..)..)))))))).	2693	2746	1	-25.2	1	8.37609e-05	0.426	0	0	-9.14974	14	20	8	3UTR		0	1
hsa-miR-1291	XM_017024512	ENDOV	...(((.((((.((((((((....&)))))))).))))...))).	1783	1803	1	-24.4	1	0.000682303	0.618	0	0	-11.405	15	20	8	3UTR		0	0
hsa-miR-1291	XM_017024796	BCAS3	.(((...(((((((((((((.(((&)))))))))......)))))))...))).	2335	2364	1	-22	1	0.133699	0.441	0	0	-11.357	19	29	9	3UTR		0	0
hsa-miR-1291	XM_017024813	PNPO	(((((((((((((.((((((((((&)))..))))))).))))))))..))))).	880	909	1	-26.6	1	0.000976152	0.544	0	0	-4.79441	23	29	8	3UTR		0	0
hsa-miR-1291	XM_017024813	PNPO	.(((((((.(((...(((((....&)))))..))).))))))).	1033	1052	1	-25.1	1	1.13974e-08	0.397	0	0	-7.73113	15	19	7	3UTR		0	0
hsa-miR-1291	XM_017025560	CBLN2	.(((((((((((..((((.(((((&))))).)))).))))))))))).	1285	1308	1	-34.6	1	1.93388e-05	0.412	0	0	-5.9393	20	23	11	3UTR		0	0
hsa-miR-1291	XM_017025681	NEDD4L	...(((((((((....((.((((.&)))).))..))))))))).	4211	4230	1	-24.8	1	0.00040169	0.471	0	0	-9.62901	15	19	9	3UTR		0	0
hsa-miR-1291	XM_017025686	PIGN	..((((((((((((((((((..((&.)).))))))))......)))))))))).	2816	2874	1	-25.9	1	0.0194987	0.647	0	0	-4.957	20	29	10	3UTR		0	0
hsa-miR-1291	XM_017025746	SMAD2	...(((((((((..(.((((((((&)))))))))..)))))).....))).	2652	2678	1	-23.4	1	3.6419e-05	0.603	0	0	-8.89356	18	26	9	3UTR		0	0
hsa-miR-1291	XM_017025749	SMAD2	(((((((..(((.(((((......&.))))))))..))))))).	7102	7125	1	-22.8	1	0.00283214	0.559	0	0	-8.59673	15	19	8	3UTR		0	0
hsa-miR-1291	XM_017026063	NAPG	((((((((((....(((.((((((&)))))).))))))))))))).	2836	2857	1	-20.3	1	0.0300559	0.618	0	0	-12.2551	19	21	13	3UTR		0	0
hsa-miR-1291	XM_017026664	ZNF844	.(((((((..((.(((((((((((&.)))))......))))))))..))))))).	6165	6206	1	-28.3	1	0.00049202	0.471	0	0	-7.38135	20	30	8	3UTR		0	0
hsa-miR-1291	XM_017026688	ZNF875	.((((((((.((.((.((((((((&))))))))))))...))))).))).	4443	4468	1	-26	1	2.50927e-05	0.441	0	0	-6.55801	20	25	12	3UTR		0	0
hsa-miR-1291	XM_017026688	ZNF875	(((((((((((.....(((((((.&)))))).)..)))))))).))).	4837	4860	1	-24.2	1	3.61791e-06	0.382	0	0	-10.3988	18	23	8	3UTR		0	0
hsa-miR-1291	XM_017026702	ZNF875	.((((((((.((.((.((((((((&))))))))))))...))))).))).	2521	2546	1	-26	1	2.50927e-05	0.441	0	0	-6.55801	20	25	12	3UTR		0	0
hsa-miR-1291	XM_017026702	ZNF875	(((((((((((.....(((((((.&)))))).)..)))))))).))).	2915	2938	1	-24.2	1	3.61791e-06	0.382	0	0	-10.3988	18	23	8	3UTR		0	0
hsa-miR-1291	XM_017026877	FXYD3	.(((((((.((((...(((((((.&)))))))...))........))))))))).	558	588	1	-27.5	1	0.000285348	0.426	0	0	-6.67505	18	30	9	3UTR		0	0
hsa-miR-1291	XM_017026878	FXYD3	.(((((((.((((...(((((((.&)))))))...))........))))))))).	477	507	1	-27.5	1	0.000285348	0.426	0	0	-6.67505	18	30	9	3UTR		0	0
hsa-miR-1291	XM_017026927	PLEKHJ1	.((((((((((.((((((((....&))))))))..)))))))))).	1056	1077	1	-24.8	1	0.00683815	0.544	0	0	-7.14013	18	21	10	3UTR		0	0
hsa-miR-1291	XM_017027011	MEIS3	...(((((((((....(((((...&))))).))))))))).	2091	2107	1	-25.6	1	8.31672e-05	0.353	0	0	-9.62901	14	16	9	3UTR		0	0
hsa-miR-1291	XM_017027335	ELL	..(.((((((((..((.(((((((&)))))))...))..))))))))).	3225	3249	1	-25.7	1	0.000843043	0.5	0	0	-10.135	18	24	9	3UTR		0	0
hsa-miR-1291	XM_017027422	AP3D1	.(((((((.((.(.((.(((.(((&.))).))))).).)).))))))).	3469	3505	1	-24	1	1.17582e-06	0.338	0	0	-9.05336	18	24	7	3UTR		0	0
hsa-miR-1291	XM_017027563	LOC105372412	(.(((((((((..((...(((((.&)))))...)).))))))))).).	1566	1589	1	-22.1	1	3.52134e-08	0.412	0	0	-9.97023	17	23	9	3UTR		0	0
hsa-miR-1291	XM_017027717	EPB41L1	.(((((((((((...(((((....&))))).....))))))))))).	4086	4108	1	-30.1	1	5.81946e-06	0.382	0	0	-6.67474	16	22	11	3UTR		0	1
hsa-miR-1291	XM_017027968	RALGAPB	..((((((((((((((.((((((.&)))))).)).)))))))))...........))).	6300	6334	1	-23	1	0.0097929	0.618	0	0	-4.957	20	34	9	3UTR		0	0
hsa-miR-1291	XM_017028281	DSCAM	((((((((..((.((((((((.((&))..)))))))).)).......))).))))).	6366	6398	1	-25.3	1	0.000942935	0.426	0	0	-7.5256	20	32	8	3UTR		0	0
hsa-miR-1291	XM_017029113	DEPDC5	((((((((..((.((((.......&))))))..)))))))).	2503	2520	1	-20.3	1	0.00757383	0.559	0	0	-7.5256	14	17	8	3UTR		0	0
hsa-miR-1291	XM_017029115	DEPDC5	((((((((..((.((((.......&))))))..)))))))).	2269	2286	1	-20.3	1	0.00757383	0.559	0	0	-7.5256	14	17	8	3UTR		0	0
hsa-miR-1291	XM_017029316	TCEANC	.(((((((.(((.((((((.(((.&.)))))).))))))))).)))).	1708	1751	1	-23	1	2.55935e-05	0.559	0	0	-6.13885	19	23	9	3UTR		0	0
hsa-miR-1291	XM_017029400	TAB3	.(((((..((((((((.(((((..&))).)).))))))))))))).	3624	3645	1	-21.5	1	8.44799e-05	0.559	0	0	-7.65065	18	21	13	3UTR		0	0
hsa-miR-1291	XM_017029475	NHSL2	.(((((((((((((((..((.(((&.))))).))))))))))))))).	13902	13927	1	-27	1	0.000269374	0.574	0	0	-3.79332	20	23	15	3UTR		0	0
hsa-miR-1291	XM_017029476	NHSL2	.(((((((((((((((..((.(((&.))))).))))))))))))))).	10019	10044	1	-27	1	0.000269374	0.574	0	0	-3.79332	20	23	15	3UTR		0	0
hsa-miR-1291	XM_017029563	PAK3	.((((((..(((((.((((.....&)).)).)))))..)))))).	3084	3104	1	-23.3	1	0.00106495	0.632	0	0	-7.8988	15	20	6	3UTR		0	0
hsa-miR-1291	XM_017029563	PAK3	.((((.((((((((..(((((((.&)))))))..))))))))................)))).	6508	6546	1	-22.6	1	0.00751023	0.574	0	0	-6.66278	19	38	8	3UTR		0	0
hsa-miR-1291	XM_017029713	RPS6KA3	((((((((((........((((((&)))))))))))))))).	5727	5744	1	-23.1	1	0.000430323	0.441	0	0	-13.2236	16	17	16	3UTR		0	0
hsa-miR-1291	XM_017029715	RPS6KA3	((((((((((........((((((&)))))))))))))))).	5780	5797	1	-23.1	1	0.000430323	0.441	0	0	-13.2236	16	17	16	3UTR		0	0
hsa-miR-1291	XM_017029716	RPS6KA3	((((((((((........((((((&)))))))))))))))).	5877	5894	1	-23.1	1	0.000430323	0.441	0	0	-13.2236	16	17	16	3UTR		0	0
hsa-miR-1291	XM_017029717	RPS6KA3	((((((((((........((((((&)))))))))))))))).	5612	5629	1	-23.1	1	0.000430323	0.441	0	0	-13.2236	16	17	16	3UTR		0	0
hsa-miR-1291	XM_017029718	RPS6KA3	((((((((((........((((((&)))))))))))))))).	5585	5602	1	-23.1	1	0.000430323	0.441	0	0	-13.2236	16	17	16	3UTR		0	0
hsa-miR-1291	XM_017029744	WNK3	.(((((((...((((((.((((((&)))).)).))))))....))))))).	8466	8492	1	-23.9	1	0.0296166	0.691	0	0	-8.917	19	26	7	3UTR		0	0
hsa-miR-1291	XM_017029892	USP26	.(((((((((((((((..((((..&.))))..))))))..........))))))))).	3101	3152	1	-23.9	1	0.0243428	0.603	0	0	-3.79332	19	33	9	3UTR		0	0
hsa-miR-1291	XM_024446047	SMAD5	.(((((.(((((((((((..(...&.)..)).)))))))))))))).	3876	3909	1	-26.6	1	6.58002e-05	0.5	0	0	-5.33701	17	22	14	3UTR		0	0
hsa-miR-1291	XM_024446050	MCC	.((((((.(((((((((.......&.))))))))).)))))).	7507	7533	1	-23.7	1	0.00198821	0.544	0	0	-6.10696	15	18	9	3UTR		0	0
hsa-miR-1291	XM_024446389	BICRAL	.((((((((..(((((..(((...&)))..)))))..)))))))).	5354	5375	1	-21.6	1	8.38407e-05	0.544	0	0	-7.86061	16	21	8	3UTR		0	0
hsa-miR-1291	XM_024446544	DEK	.((((((((((..(((..((((..&))))..)))..)))))))))).	2447	2469	1	-21.3	1	0.000225092	0.632	0	0	-8.42926	17	22	10	3UTR		0	0
hsa-miR-1291	XM_024446602	HCRTR1	.(((((.((((((((.(((.((((&.)))))))))))))))..))))).	2210	2253	1	-28.2	1	0.000796768	0.485	0	0	-5.57006	20	24	15	3UTR		0	0
hsa-miR-1291	XM_024446603	HCRTR1	.(((((.((((((((.(((.((((&)))))))))))))))..))))).	2152	2175	1	-27.8	1	0.000796768	0.485	0	0	-5.57006	20	23	15	3UTR		0	0
hsa-miR-1291	XM_024446666	RNF32	..((((((((((............&.)))))))))).	1920	1943	1	-20.9	1	0.000372015	0.544	0	0	-8.07147	10	12	10	3UTR		0	0
hsa-miR-1291	XM_024446666	RNF32	((((((((((((((((........&))))))))))......................)))))).	1504	1543	1	-20.7	1	0.00134682	0.618	0	0	-3.93757	16	39	10	3UTR		0	0
hsa-miR-1291	XM_024446993	CCDC126	..((.(((.((.(((.((((((((&))))))))))).)).))).)).	833	855	1	-21.1	1	0.000260024	0.647	0	0	-13.7123	18	22	11	3UTR		0	0
hsa-miR-1291	XM_024447005	CREB5	.((((((((..(((.(..((((((&)))).))...).)))...)))))))).	4357	4384	1	-21.6	1	0.00105785	0.632	0	0	-8.59606	18	27	8	3UTR		0	0
hsa-miR-1291	XM_024447159	ASPH	.((((((((((((.(((((.....&)))))..))))....)))))))).	4582	4606	1	-22.8	1	0.0084264	0.603	0	0	-4.65016	17	24	8	3UTR		0	0
hsa-miR-1291	XM_024447447	ANKS6	(((((((..((((.(.(((((((.&)))))))).)))).................)).))))).	2402	2441	1	-23.3	1	0.000194313	0.382	0	0	-8.39749	19	39	8	3UTR		0	0
hsa-miR-1291	XM_024448228	SYT15	.(((((((.(((((((..((((((&))))))))))))).))))))).	2638	2660	1	-26.2	1	7.49339e-05	0.471	0	0	-4.84971	20	22	13	3UTR		0	0
hsa-miR-1291	XM_024448228	SYT15	..((((((((((.(((.((((...&)))).))).........)))))))))).	4406	4434	1	-24.9	1	0.00214684	0.529	0	0	-6.24613	17	28	10	3UTR		0	0
hsa-miR-1291	XM_024448315	ENAH	(((((((((((((((..((((((.&))))))...))))..........))))))))))).	12508	12543	1	-24.5	1	0.0484843	0.456	0	0	-4.17062	21	35	11	3UTR		0	0
hsa-miR-1291	XM_024448414	TMEM234	.(((((((..(((((((((((((.&))).)))...)))))))..............))))))).	1967	2006	1	-25	1	0.00387446	0.412	0	0	-6.09222	20	39	7	3UTR		0	0
hsa-miR-1291	XM_024448693	CCDC82	(((((((((((...((((.((((.&)))).))))..............))))))))))).	5482	5517	1	-26.7	1	7.20274e-05	0.529	0	0	-9.43035	19	35	11	3UTR		0	0
hsa-miR-1291	XM_024448963	TAFA2	.(((((((.(((.((((((((.((&.)))))))))).)))..))).)))).	2066	2113	1	-23.5	1	0.00430785	0.529	0	0	-6.13885	20	26	10	3UTR		0	0
hsa-miR-1291	XM_024448963	TAFA2	(.(((((((..((((((((.((((&)))).)).......)))))).))))))).).	834	865	1	-20.8	1	0.00202187	0.588	0	0	-9.16853	20	31	7	3UTR		0	0
hsa-miR-1291	XM_024449058	LMO3	(((((((((((.((((........&)))).))))))))))).	2271	2288	1	-25.1	1	0.00051557	0.662	0	0	-7.28438	15	17	11	3UTR		0	0
hsa-miR-1291	XM_024449281	CABP1	((((((..(((..((.((((((((&)))))))))).))))))))).	1657	1678	1	-28.8	1	1.54914e-10	0.294	0	0	-12.6639	19	21	10	3UTR		0	0
hsa-miR-1291	XM_024449508	ESRRB	((((((((.(((((((((((((..&.))))).))).)).))))))))))).	2701	2754	1	-30.1	1	2.6566e-07	0.397	0	0	-4.99396	21	26	11	3UTR		0	0
hsa-miR-1291	XM_024449528	PLEKHG3	.(((((((.(((((.(((((((((&))))).))....)).)))))))))))).	5409	5437	1	-28.9	1	0.000417611	0.368	0	0	-5.58516	21	28	12	3UTR		0	0
hsa-miR-1291	XM_024449528	PLEKHG3	.((((((..(((((((((..((((&)))).)).))))))).....)))))).	5815	5842	1	-26	1	8.95594e-06	0.412	0	0	-7.16335	19	27	7	3UTR		0	0
hsa-miR-1291	XM_024449577	RAB15	.(((((((.((((((((..((...&))..)))))))).))))).)).	2670	2692	1	-24.2	1	3.45544e-05	0.485	0	0	-4.84971	17	22	8	3UTR		0	0
hsa-miR-1291	XM_024449975	ZSCAN2	..((((((...(((.((.((((((&)))))).)).))))))))).	2580	2600	1	-22.6	1	0.000520699	0.485	0	0	-10.8161	17	20	9	3UTR		0	0
hsa-miR-1291	XM_024449976	ZSCAN2	..((((((...(((.((.((((((&)))))).)).))))))))).	2009	2029	1	-22.6	1	0.000520699	0.485	0	0	-10.8161	17	20	9	3UTR		0	0
hsa-miR-1291	XM_024450575	MRPL10	((((((((((((((((((((....&.))))))))))...................)).)))))))).	1166	1214	1	-23.7	1	0.000906134	0.588	0	0	-3.93757	20	42	10	3UTR		0	0
hsa-miR-1291	XM_024450813	BCAS3	.(((...(((((((((((((.(((&)))))))))......)))))))...))).	2260	2289	1	-22	1	0.133699	0.441	0	0	-11.357	19	29	9	3UTR		0	0
hsa-miR-1291	XM_024450861	ELAC2	.(((((((.(((.((..(((((((&))))))))).)))..))))))).	2803	2826	1	-25.7	1	4.38045e-07	0.441	0	0	-6.37189	19	23	9	3UTR		0	0
hsa-miR-1291	XM_024451135	NEDD4L	...(((((((((....((.((((.&)))).))..))))))))).	4498	4517	1	-24.8	1	0.00040169	0.471	0	0	-9.62901	15	19	9	3UTR		0	0
hsa-miR-1291	XM_024451136	NEDD4L	...(((((((((....((.((((.&)))).))..))))))))).	4467	4486	1	-24.8	1	0.00040169	0.471	0	0	-9.62901	15	19	9	3UTR		0	0
hsa-miR-1291	XM_024451250	LDLRAD4	.((((((((((.(((((((((((.&)))))))..................)))))))))))...))).	3822	3865	1	-26.7	1	0.000260665	0.412	0	0	-7.14013	21	43	11	3UTR		0	0
hsa-miR-1291	XM_024451299	MFN2	..(((((.(((...((((((....&))))))..))).))))).	4035	4053	1	-24	1	0.000231461	0.515	0	0	-12.7634	14	18	6	3UTR		0	0
hsa-miR-1291	XM_024451393	ZNF558	.(((((((((....((((((((..&))))))))...)))))))..)).	2066	2089	1	-25.6	1	0.00210753	0.544	0	0	-12.1109	17	23	8	3UTR		0	0
hsa-miR-1291	XM_024451417	AKT2	.((((((((((..((.((.(((((&))))).)).))...)))))))))).	2117	2142	1	-28.4	1	9.8212e-06	0.353	0	0	-8.66231	19	25	10	3UTR		0	1
hsa-miR-1291	XM_024451469	ZNF875	.((((((((.((.((.((((((((&))))))))))))...))))).))).	3014	3039	1	-26	1	2.50927e-05	0.441	0	0	-6.55801	20	25	12	3UTR		0	0
hsa-miR-1291	XM_024451469	ZNF875	(((((((((((.....(((((((.&)))))).)..)))))))).))).	3408	3431	1	-24.2	1	3.61791e-06	0.382	0	0	-10.3988	18	23	8	3UTR		0	0
hsa-miR-1291	XM_024451616	MEIS3	...(((((((((....(((((...&))))).))))))))).	1633	1649	1	-25.6	1	8.31672e-05	0.353	0	0	-9.62901	14	16	9	3UTR		0	0
hsa-miR-1291	XM_024451617	MEIS3	...(((((((((....(((((...&))))).))))))))).	2036	2052	1	-25.6	1	8.31672e-05	0.353	0	0	-9.62901	14	16	9	3UTR		0	0
hsa-miR-1291	XM_024451629	WIZ	.((((((..(((((((((((((((&)))))))).)))))))..............)))))).	5289	5326	1	-28	1	0.000143497	0.368	0	0	-7.16335	21	37	8	3UTR		0	0
hsa-miR-1291	XM_024452251	PMM1	.(((((((((.((((.((((..((&)).))))))))))).....)))))).	1140	1166	1	-23	1	0.000171113	0.353	0	0	-6.85115	19	26	11	3UTR		0	0
hsa-miR-1291	XM_024452387	GPR143	.((((((....(((((..(((...&))))))))....)))))).	1139	1158	1	-21.7	1	0.00148363	0.485	0	0	-11.2306	14	19	8	3UTR		0	0
hsa-miR-1291	XM_024452983	LIMS2	((((((((.(((....(((((((.&))))))).....)))...)))))))).	1773	1800	1	-30.2	1	3.82646e-05	0.294	0	0	-8.10843	18	27	8	3UTR		0	1
hsa-miR-1291	XM_024452986	LIMS2	((((((((.(((....(((((((.&))))))).....)))...)))))))).	1210	1237	1	-30.2	1	3.82646e-05	0.294	0	0	-8.10843	18	27	8	3UTR		0	1
hsa-miR-1291	XM_024452990	MBD5	(((((((((..(.((((((((...&)))))))))))))))))).	6628	6647	1	-24	1	4.57595e-05	0.471	0	0	-9.29399	18	19	18	3UTR		0	0
hsa-miR-1291	XM_024453172	ELMOD3	.(((((.(((((.((.(((((((.&))))))).)).)))))...))))).	2173	2198	1	-26	1	0.00372115	0.515	0	0	-6.85919	19	25	7	3UTR		0	0
hsa-miR-1291	XM_024453172	ELMOD3	.(((((((.(((..(.((((.(((&)))..)))))..)))))))))).	2314	2337	1	-23.5	1	6.84906e-05	0.441	0	0	-7.22873	18	23	10	3UTR		0	0
hsa-miR-1291	XM_024453388	TIGIT	(((((((((((((((.........&)))))))).))))).)).	12193	12211	1	-23.5	1	0.00391198	0.691	0	0	-4.17062	15	18	8	3UTR		0	0
hsa-miR-1291	XM_024453554	CTPS1	((((((.((((((.(((((((...&.))))))).................)))))).)).)))).	2387	2432	1	-24.2	1	0.000777534	0.529	0	0	-6.3381	19	40	7	3UTR		0	0
hsa-miR-1291	XM_024453601	DCUN1D1	.(((((.((((((((((.(((...&.))).)))))).)))).))))).	1049	1082	1	-31	1	0.00261751	0.588	0	0	-5.33701	18	23	6	3UTR		0	0
hsa-miR-1291	XM_024453814	SEC22C	.((((((..(((((((((((((((&)))))))).....)))..))))..))).))).	1042	1074	1	-28.1	1	8.37869e-06	0.485	0	0	-7.16335	21	32	8	3UTR		0	0
hsa-miR-1291	XM_024453814	SEC22C	..((((((((((((...((((...&.)))).)))))))))))).	1334	1382	1	-27.4	1	0.000310919	0.676	0	0	-5.9255	16	19	12	3UTR		0	0
hsa-miR-1291	XM_024453816	SEC22C	.((((((..(((((((((((((((&)))))))).....)))..))))..))).))).	5887	5919	1	-28.1	1	8.37869e-06	0.485	0	0	-7.16335	21	32	8	3UTR		0	0
hsa-miR-1291	XM_024453816	SEC22C	..((((((((((((...((((...&.)))).)))))))))))).	6179	6227	1	-27.4	1	0.000310919	0.676	0	0	-5.9255	16	19	12	3UTR		0	0
hsa-miR-1291	XM_024453846	IQSEC1	.(((((((.(((....((((((..&)))))).)))))))))).	5823	5841	1	-27.9	1	9.03856e-09	0.353	0	0	-7.96418	16	18	10	3UTR		0	0
hsa-miR-1291	XM_024454240	SNX25	(((((((((.((((((...(((.(&).))))))))).))))))))).	4017	4039	1	-23.1	1	0.000576423	0.691	0	0	-5.18008	19	22	9	3UTR		0	0
hsa-miR-1291	XM_024454349	MGAT4B	(((((((..(((..(((..(((((&))))).)))..)))))))))).	1840	1862	1	-24.4	1	1.42051e-06	0.324	0	0	-9.45357	18	22	10	3UTR		0	0
hsa-miR-1291	NM_014563	TRAPPC2	(((((.((((((....(((((.((&)))))))...))))))..))))).	2275	2299	1	-22.7	1	7.81915e-05	0.559	4.52051	2.09815	-8.953	18	24	7	3UTR		0	0
hsa-miR-1291	NM_014580	SLC2A8	.(((((((((((((..((((((.(&).))))))...))))))))..........).)))).	1827	1863	1	-24.8	1	0.000231542	0.456	-0.571507	0.53311	-4.76182	20	36	8	3UTR		0	0
hsa-miR-1291	NM_014620	HOXC4	((((((((((((((...((((...&)))))))))))..))).)))).	2058	2080	1	-22.7	1	0.00238331	0.574	1.73345	2.09226	-4.90607	18	22	11	3UTR		0	0
hsa-miR-1291	NM_014630	ZNF592	.((((((((((....((((.((((&.)))).))))..)))))))))).	5514	5560	1	-30.9	1	9.35831e-06	0.412	0.175602	-0.038821	-10.0215	18	23	10	3UTR		0	0
hsa-miR-1291	NM_014672	PRORP	.((((((((..((((((((((...&)))).)))..)))..)))))))).	5446	5470	1	-25.4	1	0.00859452	0.515	0.360956	0.314084	-7.86061	18	24	8	3UTR		0	0
hsa-miR-1291	NM_014677	RIMS2	.(((((((.(((.(((((((((((&))))))))))))))))).)))).	6515	6538	1	-34.1	1	0.00222988	0.544	0.0981739	-0.308085	-6.13885	21	23	17	3UTR		0	0
hsa-miR-1291	NM_014687	RUBCN	(((((((.(((......((((...&))))......))).))))))).	8970	8992	1	-23.1	1	0.0112979	0.574	4.74011	3.08446	-12.7125	14	22	7	3UTR		0	0
hsa-miR-1291	NM_014712	SETD1A	.(((((((.((((...(((.....&)))..))))))))))).	5427	5444	1	-24	1	6.68834e-10	0.309	0.591774	0.211329	-6.67505	14	17	11	3UTR		0	0
hsa-miR-1291	NM_014721	PHACTR2	..(((((.((((((((((((((((&))))))))))).......))))).))))).	7047	7077	1	-32.7	1	0.00103661	0.5	0.443623	0.246269	-7.27064	21	30	11	3UTR		0	0
hsa-miR-1291	NM_014723	SNPH	((((((((.(((((((((((....&)))).))))))).)))))))).	2031	2053	1	-31.4	1	1.03129e-06	0.353	0.0723802	0.147148	-4.99396	19	22	8	3UTR		0	1
hsa-miR-1291	NM_014728	FRMPD4	..((((((((.(.((((.((((((&))))))..))))))))))))).	5355	5377	1	-28.7	1	2.67294e-06	0.441	0	0	-9.07091	19	22	13	3UTR		0	0
hsa-miR-1291	NM_014732	KIAA0513	.((((((((((((((((((((((.&))))))).))))))))))))..............))).	5383	5421	1	-26.9	1	7.77735e-05	0.559	-0.0883608	-0.373965	-3.79332	22	38	12	3UTR		0	0
hsa-miR-1291	NM_014747	RIMS3	((((((.(((((..((...(((((&.)))))))..))))))))))).	3924	3954	1	-24.5	1	0.00010586	0.471	-0.0121917	-0.104148	-7.62723	18	22	11	3UTR		0	1
hsa-miR-1291	NM_014757	MAML1	...(((((((((((((((((....&)))))))))...)))))))).	5328	5349	1	-26.4	1	6.69704e-05	0.515	1.14865	1.46587	-6.51454	17	21	9	3UTR		0	0
hsa-miR-1291	NM_014758	SNX19	(((((((.(((((((...(((...&))).))))))).))))))).	5250	5270	1	-28.1	1	0.000676112	0.544	-0.159816	-0.0586977	-6.48426	17	20	7	3UTR		0	1
hsa-miR-1291	NM_014763	MRPL19	.((((..((((.((((((((((..&.)))))))))).))))...)))).	3876	3912	1	-31	1	0.000113071	0.529	0.244473	-0.0864567	-10.5848	18	24	10	3UTR		0	0
hsa-miR-1291	NM_014773	DELE1	((((((((.((((.(((((.(...&).))).))...)))))))))))).	4439	4463	1	-28.3	1	1.31203e-05	0.353	0.745946	0.161205	-5.8508	18	24	12	3UTR		0	0
hsa-miR-1291	NM_014779	TSC22D2	.((((((.((((((..((......&.))..)))))).)))))).	10687	10713	1	-24.4	1	0.00145381	0.559	0.0455158	0.0520364	-7.07546	14	19	6	3UTR		0	0
hsa-miR-1291	NM_014789	ZNF623	..(((((.((((....(((((...&)))))..)))).))))).	1922	1940	1	-23.3	1	0.000216423	0.471	0.441357	-0.579958	-10.3851	14	18	5	3UTR		0	0
hsa-miR-1291	NM_014813	LRIG2	.(((((.((((((.((((((.(((&))))))))).))....)))).))))).	5632	5659	1	-24.4	1	0.000602292	0.5	2.5747	1.87656	-6.19385	20	27	9	3UTR		0	0
hsa-miR-1291	NM_014823	WNK1	.((((((((((((((((.(((...&))).))))))).)))))))..)).	8738	8762	1	-23.3	1	0.000309563	0.529	0.641108	0.639253	-3.79332	19	24	7	3UTR		0	0
hsa-miR-1291	NM_014828	TOX4	((((((((.((((((.........&))))))))).))))).	2088	2104	1	-22.3	1	7.68665e-05	0.485	0.456344	0.651089	-5.22701	14	16	9	3UTR		0	0
hsa-miR-1291	NM_014830	ZBTB39	..((((((.(((.(.((((.((((&)))).)))).).))))))))).	3348	3370	1	-25.9	1	0.00057023	0.471	0.402987	0.52463	-8.03797	18	22	9	3UTR		0	0
hsa-miR-1291	NM_014864	FAM20B	(((((((((...(((((((((...&))))).....)))).....))))))))).	2669	2698	1	-24.1	1	0.0121159	0.588	0.0643262	-0.148005	-11.3517	18	29	9	3UTR		0	0
hsa-miR-1291	NM_014867	KBTBD11	.((((((((((.....(((.((((&)).)).)))..)))))))))).	3113	3135	1	-27.2	1	1.61713e-05	0.279	-0.398491	-0.471552	-10.2546	17	22	10	3UTR		0	0
hsa-miR-1291	NM_014868	RNF10	.((((((((((((....((((((.&.)))))).....))).))))))))).	3249	3280	1	-28.4	1	0.000228903	0.471	-0.232463	0.137314	-5.61866	18	26	9	3UTR		0	0
hsa-miR-1291	NM_014870	ZBTB40	.(((((((((((..(.((((((((&))))))))))))).............................))))))).	6228	6278	1	-25.4	1	0.000284296	0.632	0.0700342	0.0744549	-6.17234	20	50	13	3UTR		0	0
hsa-miR-1291	NM_014873	LPGAT1	.((((((.((((((((((..((((&.)))))))))......))))).)))))).	6924	6980	1	-25.3	1	7.35068e-05	0.485	4.33687	4.28136	-6.10696	20	29	9	3UTR		0	0
hsa-miR-1291	NM_014874	MFN2	..(((((.(((...((((((....&.))))))..))).))))).	3657	3682	1	-24.7	1	0.000231461	0.515	0.536725	-0.052296	-12.7634	14	19	6	3UTR		0	0
hsa-miR-1291	NM_014883	FAM13A	.((((((((((((.(((.(((((.&))))).)))..)))))))).)))).	5601	5626	1	-23.4	1	0.0160098	0.529	2.51324	1.76454	-4.65016	20	25	8	3UTR		0	0
hsa-miR-1291	NM_014887	N4BP2L2	.((((..((...((((((((....&))))))))....))..)))).	4494	4515	1	-20.5	1	0.00286578	0.515	0.280648	0.130136	-14.6521	14	21	8	3UTR		0	0
hsa-miR-1291	NM_014893	NLGN4Y	(((((((.(((((((.(.(((...&))).).)))))))))))))).	3861	3882	1	-22.2	1	9.41234e-09	0.529	1.65159	0.877729	-6.48426	18	21	14	3UTR		0	0
hsa-miR-1291	NM_014920	CILK1	.((((((....((((.(((.....&)))))))...)))))).	4122	4139	1	-20.4	1	0.00029296	0.603	2.22319	2.27406	-11.4637	13	17	7	3UTR		0	0
hsa-miR-1291	NM_014941	MORC2	.(((((((.(((...(((.(((..&))).))).)))))))))).	5188	5207	1	-24.6	1	8.35033e-06	0.412	0.110467	0.391661	-7.73113	16	19	10	3UTR		0	0
hsa-miR-1291	NM_014943	ZHX2	((((((((.(((.((((((.....&)))))).....))).)).)))))).	3154	3179	1	-22.7	1	0.000112922	0.456	0.810919	0.758093	-6.28309	17	25	6	3UTR		0	0
hsa-miR-1291	NM_014947	FOXJ3	...((((((((....((((((...&))))))..)))))))).	4068	4085	1	-23.4	1	0.0002718	0.485	4.66972	4.68477	-12.7428	14	17	8	3UTR		0	0
hsa-miR-1291	NM_014964	EPN2	((((((((((((.(((..((((((&))))))))))))))..)).))))).	4736	4761	1	-23.3	1	0.000120215	0.471	1.44239	1.64845	-5.22671	21	25	14	3UTR		0	0
hsa-miR-1291	NM_014971	EFR3B	.(((((((((((..(.(((((.((&)).))))))))))))))))).	6604	6625	1	-24.9	1	3.86149e-07	0.426	-0.504434	0.0140023	-6.17234	19	21	17	3UTR		0	0
hsa-miR-1291	NM_014977	ACIN1	((((((((.(((....((((.((.&.)).))))...))).)))))))).	4684	4725	1	-24	1	2.14951e-06	0.426	1.56028	0.733666	-8.10843	17	24	8	3UTR		0	0
hsa-miR-1291	NM_014979	SV2C	.(((((((.((((((.((((((((&))))))))))))))..............))))))).	8714	8750	1	-29.4	1	1.4474e-06	0.441	0.0554909	-0.391842	-5.08276	21	36	14	3UTR		0	0
hsa-miR-1291	NM_014979	SV2C	(((((((((....(((((..(((.&)))..)))))....))))))))).	4164	4188	1	-28	1	0.000459085	0.471	-0.0207978	0.121703	-12.6408	17	24	9	3UTR		0	0
hsa-miR-1291	NM_015023	WDTC1	.(((((.((((((((.(((((((.&))))))).))))))..)).))))).	2611	2636	1	-26.9	1	0.000114338	0.441	1.55046	1.40066	-5.57006	20	25	7	3UTR		0	0
hsa-miR-1291	NM_015027	PDXDC1	.(((((..((((((((((.(((((&))))).)))))))))).......................))).)).	2966	3012	1	-23.6	1	0.00145102	0.559	1.74055	3.00669	-7.65065	20	46	10	3UTR		0	0
hsa-miR-1291	NM_015037	ZSWIM8	((((((((((((.((.((((((((&))))))...)).)).))).))))))))).	5928	5957	1	-27.2	1	0.000997484	0.441	1.17812	1.48729	-5.45975	22	29	9	3UTR		0	0
hsa-miR-1291	NM_015071	ARHGAP26	(((((.((((....((.(((((((&)))))))..))....)))).))))).	2877	2903	1	-24.1	1	3.236e-06	0.5	1.8282	1.64934	-14.1561	18	26	7	3UTR		0	0
hsa-miR-1291	NM_015071	ARHGAP26	.(((((.(((((((.(((((((((&))))).........................)))).)))))))........................))))).	4719	4791	1	-23.7	1	0.00211372	0.574	-0.164254	0.185342	-6.07246	21	72	7	3UTR		0	0
hsa-miR-1291	NM_015085	RAP1GAP2	(((((..(((((..((((((((((&)))))))))).........))))).))))).	2425	2456	1	-29	1	5.84536e-05	0.368	0.675847	0.297521	-9.52819	20	31	10	3UTR		0	0
hsa-miR-1291	NM_015090	NFASC	((((((((.((.....((((((..&)))))))))))))))).	7929	7946	1	-26.3	1	5.74351e-05	0.397	-0.0490142	-0.4911	-11.4552	16	17	16	3UTR		0	1
hsa-miR-1291	NM_015101	COLGALT2	(((((((....(((((((((.((.&)))))))))))....))))))).	2290	2313	1	-23.6	1	0.00436639	0.618	0.442211	0.146642	-11.3749	18	23	11	3UTR		0	0
hsa-miR-1291	NM_015134	MPRIP	((((((((((.((((....(((((&)))))...)))).)))))))))).	10642	10666	1	-29	1	0.000333685	0.574	-0.513261	-0.195445	-6.9954	19	24	10	3UTR		0	0
hsa-miR-1291	NM_015138	RTF1	.(((.(((.((((((.((((((((&))))).))).))))))))).))).	4211	4235	1	-23.7	1	9.61415e-07	0.485	0.877992	1.60975	-9.2018	20	24	9	3UTR		0	0
hsa-miR-1291	NM_015146	SEPTIN8	.((((((((.(((((.(((((((.&)))))))))))))))))))).	3729	3750	1	-26.2	1	0.000358054	0.647	4.16341	5.22346	-5.26888	20	21	20	3UTR		0	0
hsa-miR-1291	NM_015150	RFTN1	.(((((((..(((.(((..(((.(&).)))..))).)))...))))))).	2314	2339	1	-23	1	9.73157e-05	0.382	2.4493	2.20541	-6.94906	17	25	7	3UTR		0	0
hsa-miR-1291	NM_015156	RCOR1	((((((((((((....((((((.(&.).))))))....)))))))).)))).	4594	4632	1	-26.5	1	0.000239493	0.485	0.172981	0.0374292	-7.05204	19	27	8	3UTR		0	0
hsa-miR-1291	NM_015198	COBL	(((((((((..(((((((((((((&))))))))..)))))............))))))))).	4509	4546	1	-27.7	1	0.0017154	0.559	1.57763	3.35273	-8.00486	22	37	9	3UTR		0	0
hsa-miR-1291	NM_015203	RPRD2	...((((((((.....(((((...&)))))..)))))))).	5267	5283	1	-21.2	1	0.000384477	0.529	0.497516	0.456289	-12.9758	13	16	8	3UTR		0	0
hsa-miR-1291	NM_015216	PPIP5K2	(((.(((.((((.(((((.(((((&))))).))))))))).))).))).	8805	8829	1	-24.4	1	0.000498764	0.662	0.171987	0.0544733	-10.5724	20	24	9	3UTR		0	0
hsa-miR-1291	NM_015216	PPIP5K2	.((((.((((((.((((...((..&))...)))))))))).)))).	9450	9471	1	-22.9	1	0.000338652	0.441	0.529657	-0.137486	-6.98341	16	21	10	3UTR		0	0
hsa-miR-1291	NM_015271	TRIM2	.((((((((((((((.(((.((.(&).)).))).)))))))))).....)))).	3745	3774	1	-25.7	1	0.000816209	0.647	0.408981	0.341868	-4.02637	20	29	10	3UTR		0	0
hsa-miR-1291	NM_015277	NEDD4L	...(((((((((....((.((((.&)))).))..))))))))).	4874	4893	1	-24.8	1	0.00040169	0.471	-0.478168	-0.126445	-9.62901	15	19	9	3UTR		0	0
hsa-miR-1291	NM_015279	TBC1D30	...((((..((((((((((((...&))))))))))...))..)))).	4769	4791	1	-23.7	1	6.93775e-06	0.515	0.131744	-0.086085	-9.88456	16	22	10	3UTR		0	0
hsa-miR-1291	NM_015283	DPY19L1	.(((.((((((((((((..(((((&)))))..)).))))))))).)...))).	2603	2631	1	-20.3	1	0.0114542	0.574	1.53691	1.12316	-7.91236	20	28	9	3UTR		0	0
hsa-miR-1291	NM_015285	WDR7	..((((.((((((.(((((((((.&))).))))))..)))))))))).	6007	6030	1	-21.2	1	0.00161473	0.691	0.606205	0.590833	-7.35753	19	23	10	3UTR		0	0
hsa-miR-1291	NM_015324	RRP8	..(((((((.((((..(((((((.&)))))))...))))))))...))).	2986	3011	1	-22.9	1	2.1077e-05	0.544	0.0990542	0.173189	-7.16801	18	25	8	3UTR		0	0
hsa-miR-1291	NM_015327	SMG5	.((((((((((((......(((((&))))))))))))).)))).	4131	4150	1	-26.3	1	0.000322221	0.397	5.38901	5.39272	-5.61866	17	19	13	3UTR		0	0
hsa-miR-1291	NM_015329	MAU2	.(((((((.((...(((((((.((&))..)))))))...)).))))))).	3309	3334	1	-27.8	1	1.55102e-06	0.368	0.288174	-0.252868	-10.3425	18	25	7	3UTR		0	0
hsa-miR-1291	NM_015336	ZDHHC17	(((((((((((...(((((.....&.)))))....))))))).)))).	4255	4286	1	-25.6	1	0.000167272	0.603	0.562191	0.270594	-9.43035	16	23	7	3UTR		0	0
hsa-miR-1291	NM_015345	DAAM2	(.((((((((((...((((((...&.))))))...)))))))))).).	5750	5798	1	-30.8	1	2.7391e-06	0.456	0.799863	0.267273	-7.98267	17	23	10	3UTR		0	0
hsa-miR-1291	NM_015349	BICRAL	.((((((((..(((((..(((...&)))..)))))..)))))))).	5462	5483	1	-21.6	1	8.38407e-05	0.544	0.581214	0.627471	-7.86061	16	21	8	3UTR		0	0
hsa-miR-1291	NM_015358	MORC3	......((((.((((((((((...&)))))))))).)))).	4148	4164	1	-22.4	0	0.0440751	0.721	2.49776	1.46844	-18.3913	14	16	10	3UTR		0	0
hsa-miR-1291	NM_015421	TMEM186	((((((((((((((.....((((.&.))))....))))))))).....))))).	826	907	1	-23.5	1	0.00162156	0.618	2.52775	1.64996	-4.90607	18	29	9	3UTR		0	0
hsa-miR-1291	NM_015433	EEF1AKMT3	.(((((((((((((((((((....&.))))).)))).)))))))))).	1881	1931	1	-25.3	1	0.00131542	0.559	0.283134	0.0831289	-3.79332	19	23	10	3UTR		0	0
hsa-miR-1291	NM_015436	RCHY1	.(((((.((.(.(((((((((...&))))))))).)..))..))))).	2657	2680	1	-26.1	1	0.000676965	0.485	-0.165051	-0.0669734	-9.92632	17	23	9	3UTR		0	0
hsa-miR-1291	NM_015458	MTMR9	(((((..(((.(((.((..(((((&)))))..)).)))))).))))).	6372	6395	1	-22.2	1	8.05998e-06	0.588	0.94147	0.458462	-10.9424	18	23	6	3UTR		0	0
hsa-miR-1291	NM_015459	ATL3	(((((.((.(((((..((((((.(&).))))))..)).))).)).).)))).	4850	4877	1	-22.6	1	0.000212123	0.426	0.0320775	0.423594	-7.86342	19	27	6	3UTR		0	0
hsa-miR-1291	NM_015463	CNRIP1	.((((...((((((..((((((..&)).))))..)))))))))).	1319	1339	1	-21.8	1	3.23145e-05	0.485	3.48248	3.11406	-10.5201	16	20	10	3UTR		0	0
hsa-miR-1291	NM_015471	NSL1	.(((((.((.(.(((((((((...&))))))))).)..))..))))).	7905	7928	1	-26.1	1	0.000214305	0.426	-0.0959397	0.159157	-9.92632	17	23	9	3UTR		0	0
hsa-miR-1291	NM_015477	SIN3A	(((((((((....(..(((.((((&)))).)))..)....))))))))).	6420	6445	1	-23.5	1	0.000141521	0.426	3.75138	3.21417	-13.6093	17	25	9	3UTR		0	0
hsa-miR-1291	NM_015483	KBTBD2	((((((((((((((((((......&.))))))).))))))..))))).	3039	3079	1	-26.6	1	0.000194112	0.544	5.65502	3.56802	-3.93757	18	23	7	3UTR		0	0
hsa-miR-1291	NM_015491	PNISR	((((..(((.(((...((((((((&))))))))..))).))).)))).	3449	3472	1	-20.3	1	0.00797999	0.603	2.65777	2.68788	-13.0254	18	23	8	3UTR		0	0
hsa-miR-1291	NM_015547	ACOT11	(.((((((.(((.((((((((...&)))))))))))))).))).).	4412	4433	1	-27.4	1	4.20176e-05	0.441	-0.120843	-0.0658778	-7.44677	18	21	14	3UTR		0	0
hsa-miR-1291	NM_015595	ARHGEF26	((((((.((((...(((((((...&)))))))))))..)))))).	2846	2866	1	-24.6	1	1.7672e-05	0.574	1.46076	0.490505	-10.974	17	20	11	3UTR		0	0
hsa-miR-1291	NM_015617	PYGO1	(((((.((((((((..(((((...&)))))..)).))))))...............))))).	4585	4622	1	-22.7	1	0.00805948	0.559	0.674775	0.634755	-6.80703	18	37	6	3UTR		0	0
hsa-miR-1291	NM_015646	RAP1B	.(((((.((.(.((((((((((..&.)))))))))).)..))..))))).	10879	10909	1	-24.4	1	0.00152156	0.529	-0.167346	-0.0214411	-9.92632	18	25	10	3UTR		0	0
hsa-miR-1291	NM_015649	IRF2BP1	...((((((((((((..(((((((&)))))))))).))))))))).	2372	2393	1	-23.8	1	0.000290433	0.382	-0.0483178	0.687726	-6.74759	19	21	10	3UTR		0	0
hsa-miR-1291	NM_015658	NOC2L	((((((((.((....(((.((...&)))))....)))))))))).	2729	2749	1	-24.8	1	4.54547e-05	0.489	0	0	-11.2222	15	20	10	3UTR		0	0
hsa-miR-1291	NM_015659	RSL1D1	.(((((..(((((((.((((((((&)))))))))).......)))))))))).	2337	2365	1	-23.7	1	0.000515701	0.544	-0.0818031	-0.0897377	-7.8837	20	28	10	3UTR		0	0
hsa-miR-1291	NM_015693	INTU	((((...(((((((..((((((((&)))))))).))))))).)))).	5835	5857	1	-28.2	1	0.000800717	0.662	0.26963	0.0495489	-12.4698	19	22	8	3UTR		0	0
hsa-miR-1291	NM_015704	DESI1	.(((.((((..((((((((((((.&)))))))))))).)))).))).	3723	3745	1	-23.1	1	0.00667929	0.603	0.648431	1.24898	-11.9796	19	22	12	3UTR		0	0
hsa-miR-1291	NM_015722	CALY	..(((((....((((.((((((((&)))))))).))))..))))).	2087	2108	1	-28.8	1	0.000130878	0.456	0.957733	0.435829	-12.6274	17	21	8	3UTR		0	0
hsa-miR-1291	NM_015848	KRT76	((((((((...(((((((((.(((&))).))))).................)))).)))))))).	2105	2145	1	-25	1	2.11816e-05	0.397	0.74172	0.600413	-9.06125	20	40	8	3UTR		0	1
hsa-miR-1291	NM_015850	FGFR1	.((((.(((((.....(((((.((&)))))))......))))).)))).	4347	4371	1	-23.9	1	0.00808702	0.412	3.2612	4.17144	-12.1556	16	24	7	3UTR		0	0
hsa-miR-1291	NM_015850	FGFR1	.((((..((((((.(((((((((.&))))))))).)))..))).................)))).	5093	5133	1	-23.4	1	0.0010905	0.471	0.425203	0.46585	-8.09481	19	40	9	3UTR		0	0
hsa-miR-1291	NM_015866	PRDM2	.((((((.(((((((..((((((.&))))))))))))).)))))).	6076	6097	1	-33.5	1	2.69058e-06	0.338	0.837413	1.21547	-6.34001	19	21	13	3UTR		0	0
hsa-miR-1291	NM_015881	DKK3	((((((((.((((...((((((.(&).)))).)).....)))).)))))))).	1541	1569	1	-24.1	1	0.00840372	0.426	2.95774	0.792057	-6.8193	19	28	8	3UTR		0	0
hsa-miR-1291	NM_015885	PCF11	.(((((((.((..((.((((((((&)))).))))))..))))))))).	5075	5098	1	-28.3	1	4.62174e-06	0.647	1.84118	3.54624	-9.7187	19	23	9	3UTR		0	1
hsa-miR-1291	NM_015913	TXNDC12	((((((.(((((.((((((((...&)))))))).)).))).).))..))).	777	803	1	-22.5	1	0.00375294	0.515	1.13354	1.51062	-6.77039	19	26	8	3UTR		0	0
hsa-miR-1291	NM_015993	PLLP	((((((((.(((....(((((.((&)).)))))....)))..)))))))).	717	743	1	-25.8	1	0.000135038	0.309	-0.144757	-0.0159132	-8.10843	18	26	8	3UTR		0	0
hsa-miR-1291	NM_015995	KLF13	(.((((((.((((((((((((...&)))))))...)))))..)))))).).	3777	3803	1	-26.7	1	0.0129239	0.441	1.35021	1.3194	-6.15764	19	26	7	3UTR		0	0
hsa-miR-1291	NM_016011	MECR	.((((((((((((...(((((...&)))))...........)))))))))))).	1199	1228	1	-26.9	1	7.0537e-08	0.368	-0.509474	0.191512	-5.61866	17	29	12	3UTR		0	0
hsa-miR-1291	NM_016020	TFB1M	.((((((.(((((((((.......&))))))))))))))).	2156	2172	1	-22.9	1	0.000243939	0.5	4.75169	3.94405	-6.10696	15	16	15	3UTR		0	0
hsa-miR-1291	NM_016021	UBE2J1	.((((((....(((((((((....&.))))))))))))))).	3318	3365	1	-22.5	1	1.56761e-05	0.5	1.37322	1.45274	-11.2306	15	17	15	3UTR		0	0
hsa-miR-1291	NM_016032	ZDHHC9	(((((((((.((.(((((((....&.))))))))).)).))))))).	1806	1840	1	-25.5	1	4.66272e-05	0.471	2.22874	1.88102	-6.46921	18	22	9	3UTR		0	0
hsa-miR-1291	NM_016056	TMBIM4	((((((((.(((((..((......&.))..))))))))))))).	2678	2712	1	-22.3	1	0.000363422	0.471	3.44926	2.77031	-5.96246	15	19	13	3UTR		0	0
hsa-miR-1291	NM_016080	GLOD4	((((((((((((((..(((((...&.)))))..)).....)))))))))))).	1228	1261	1	-23.1	1	0.000762789	0.574	3.01197	3.60792	-4.90607	19	28	12	3UTR		0	0
hsa-miR-1291	NM_016097	IER3IP1	((((((((((((....((......&))...)))))).....)))))).	2092	2115	1	-22.1	1	0.010349	0.544	0.177077	0.281364	-7.05204	14	23	6	3UTR		0	0
hsa-miR-1291	NM_016115	ASB3	((((((...((.(((((((((...&))).)))))).)))))))).	1824	1844	1	-22.6	1	0.00138427	0.632	3.50308	2.36312	-12.1981	17	20	8	3UTR		0	0
hsa-miR-1291	NM_016120	RLIM	.(((((.((((((.....((((((&))))))......))))))))))).	7105	7129	1	-23.9	1	4.8835e-05	0.588	0.423123	0.369835	-7.16235	17	24	11	3UTR		0	0
hsa-miR-1291	NM_016125	RNFT1	(((((((((((((.(.((..((((&))))....))).)))).........))))))))).	1439	1474	1	-22.1	1	0.000504066	0.618	4.69269	4.26309	-5.02746	20	35	9	3UTR		0	0
hsa-miR-1291	NM_016132	MYEF2	(.((((((.((((((.(((.....&))).)))))))))))).).	4133	4152	1	-22.7	1	0.00106515	0.5	0.289462	0.709138	-6.39069	16	19	12	3UTR		0	0
hsa-miR-1291	NM_016166	PIAS1	....((.(.(((((((((((((((&))))))))))))).)).).)).	3483	3505	1	-24.1	1	0.000415281	0.588	0.858544	1.07277	-12.1466	18	22	13	3UTR		0	0
hsa-miR-1291	NM_016179	TRPC4	((((((...(((((((((((....&)))))))))))............)))))).	5095	5125	1	-23.3	1	0.000380627	0.588	0.775159	1.58329	-8.85129	17	30	11	3UTR		0	0
hsa-miR-1291	NM_016183	MRTO4	..((((.((((((((((((((...&.)))))......)))))))))..)))).	1543	1600	1	-28.2	1	0.000114653	0.441	-0.348887	-0.197389	-6.50069	18	28	9	3UTR		0	0
hsa-miR-1291	NM_016185	JPT1	.(((((((.(((((((((.((...&.)).)))))))....))...))))))).	1258	1291	1	-24.2	1	0.00135951	0.5	2.43967	2.93474	-4.84971	18	28	7	3UTR		0	0
hsa-miR-1291	NM_016200	LSM8	((((((((.(((.((.((..((((&)))).))))))))))))))).	3244	3265	1	-22	1	3.0249e-05	0.603	0.14479	-0.00851789	-6.51614	19	21	15	3UTR		0	0
hsa-miR-1291	NM_016206	VGLL3	..(((.....(((((.((((((((&)))))))).)))))..))).	2858	2878	1	-22.9	1	0.000837989	0.632	0.528813	0.45241	-13.2472	16	20	8	3UTR		0	0
hsa-miR-1291	NM_016210	C3orf18	.((((((((..((((.(((((((.&)))))))))))..........................)))))))).	1295	1341	1	-27.7	1	9.95269e-05	0.426	0.239271	0.0879382	-8.09365	19	46	11	3UTR		0	0
hsa-miR-1291	NM_016218	POLK	...(((((((((.(((((((((((&)))))))..)))).))).....)))))).	9769	9798	1	-26.3	1	0.00800031	0.618	-0.0149004	0.421409	-7.80367	20	29	7	3UTR		0	0
hsa-miR-1291	NM_016218	POLK	(((((((..((...(((.(((...&.))).))).))..))))))).	7182	7226	1	-24.1	1	0.00371568	0.5	-0.159591	0.169137	-12.8004	15	21	7	3UTR		0	0
hsa-miR-1291	NM_016230	CYB5R4	.(((((((.((((..((((.((((&.)))).))))))))))))..))).	2546	2584	1	-25.7	1	1.02351e-06	0.485	0.825079	0.073152	-6.442	19	24	12	3UTR		0	0
hsa-miR-1291	NM_016230	CYB5R4	.(.((((((...(((((((.(((.&))).))))))).)))))).).	5705	5726	1	-23.4	1	0.000143585	0.588	0.31421	-0.0215432	-12.7649	17	21	7	3UTR		0	0
hsa-miR-1291	NM_016235	GPRC5B	(((((..(((((.((((((.((.(&).)).)))))))))))))))).	4131	4153	1	-26.4	1	1.22524e-06	0.397	2.18215	3.58828	-8.67135	19	22	16	3UTR		0	0
hsa-miR-1291	NM_016240	SCARA3	((((((...(((..(.(((((((.&)))))))))))..)))))).	2609	2629	1	-27.2	1	2.35576e-07	0.426	1.58271	-0.120367	-11.2303	17	20	11	3UTR		0	0
hsa-miR-1291	NM_016247	IMPG2	.((((((((((.....(((((...&))))).....))..)))))))).	4198	4221	1	-21.9	1	5.95785e-05	0.559	0.157224	0.15515	-10.2546	15	23	8	3UTR		0	0
hsa-miR-1291	NM_016257	HPCAL4	..((((((.(((.(((((..((((&)))).))))).))).)))))).	4061	4083	1	-27.4	1	0.00109678	0.588	6.69344	5.45393	-7.30252	18	22	6	3UTR		0	1
hsa-miR-1291	NM_016257	HPCAL4	..((((((.(((..((((.(((((&))))).....))))..))))))))).	3063	3089	1	-24.9	1	0.000118163	0.574	0.788962	0.922039	-8.15936	18	26	9	3UTR		0	1
hsa-miR-1291	NM_016282	AK3	.(((((((..((((((((((....&)))))).))))))))))).	2517	2536	1	-25.6	1	4.8481e-06	0.471	-0.235338	-0.0960088	-6.09222	17	19	11	3UTR		0	0
hsa-miR-1291	NM_016304	RSL24D1	..(((((((..((((((((.....&))))))))))))))).	1588	1604	1	-18.2	1	0.00394581	0.706	4.43501	4.67048	-9.02428	15	16	15	3UTR		0	0
hsa-miR-1291	NM_016320	NUP98	((((((((((.....((((((...&)))))))))))))))).	6557	6574	1	-26	1	4.55415e-06	0.471	1.25449	2.75984	-12.9906	16	17	16	3UTR		0	0
hsa-miR-1291	NM_016320	NUP98	.(((...(((((((((((((....&)))))))))))))..))).	6307	6326	1	-23.5	1	0.00137183	0.5	4.37149	4.52077	-11.357	16	19	13	3UTR		0	0
hsa-miR-1291	NM_016329	SFMBT1	..((((((.(((((.((((((((.&)))))))...................).))))))))..))).	3176	3218	1	-22.8	1	0.000267166	0.618	3.65536	3.81813	-6.74884	19	42	8	3UTR		0	0
hsa-miR-1291	NM_016338	IPO11	.((((((((.((....((.(((.(&).))).))....)))))))))).	3964	3987	1	-24	1	1.96717e-06	0.441	0.0722266	0.0561939	-8.1503	16	23	10	3UTR		0	1
hsa-miR-1291	NM_016343	CENPF	..((((((((((((((........&.)))))))))))))).	9575	9600	1	-26.1	1	0.000103371	0.574	-0.408626	-0.333934	-4.957	14	16	14	3UTR		0	0
hsa-miR-1291	NM_016400	HYPK	(((((((((.....((((......&))))..))))))))).	2081	2097	1	-20.7	1	0.00159183	0.515	0.237608	-0.138741	-13.4976	13	16	9	3UTR		0	0
hsa-miR-1291	NM_016417	GLRX5	((((((.(((...((((((((...&.))))))))...))).)))))).	644	682	1	-27.2	1	3.40869e-05	0.632	0.465249	0.191366	-12.942	17	23	8	3UTR		0	0
hsa-miR-1291	NM_016418	NF2	..((((((.(((....(((.((((&)))).)))....))).)))))).	2870	2893	1	-25.1	1	3.8222e-05	0.353	0.267855	0.0666757	-9.12786	16	23	6	3UTR		0	1
hsa-miR-1291	NM_016472	GSKIP	.((((((..((((((.........&)))))).)))))).	578	592	1	-17.6	1	0.000140797	0.559	-0.315707	2.01927	-7.3964	12	14	6	3UTR		0	0
hsa-miR-1291	NM_016474	CCDC174	.(((((((.((.(...(((((...&)))))...).))))))))).	2326	2346	1	-23.9	1	3.2233e-05	0.412	-0.0878474	-0.239279	-10.0219	15	20	9	3UTR		0	0
hsa-miR-1291	NM_016483	PHF7	((((((((.((........(((((&)))))..........)))))))))).	1885	1911	1	-22.2	1	0.00672675	0.456	0.255342	0.263465	-11.4552	15	26	10	3UTR		0	0
hsa-miR-1291	NM_016497	MRPL51	.(((((.((((.((((((......&)).)))).)))).))))).	718	737	1	-19.4	1	3.77521e-06	0.574	0.565798	0.738676	-8.68381	15	19	5	3UTR		0	0
hsa-miR-1291	NM_016500	PBDC1	.(((((((((((.((((.((....&)).))))..)))))))).))).	911	933	1	-22.5	1	0.00282081	0.515	0.625069	0.351198	-5.08246	17	22	8	3UTR		0	0
hsa-miR-1291	NM_016513	CILK1	.((((((....((((.(((.....&)))))))...)))))).	4233	4250	1	-20.4	1	0.00029296	0.603	2.46556	3.17281	-11.4637	13	17	7	3UTR		0	0
hsa-miR-1291	NM_016516	VPS54	((((((((((.......(((((((&))))))).)))))))))).	4428	4447	1	-25.4	1	0.000398817	0.632	1.29437	1.02129	-13.2236	17	19	10	3UTR		0	0
hsa-miR-1291	NM_016548	GOLM1	.(((((((.(((..(.((((((.(&.).)))))))..)))))))))).	1641	1679	1	-26.2	1	2.57014e-05	0.574	0.370023	0.473858	-7.22873	18	23	10	3UTR		0	0
hsa-miR-1291	NM_016565	COA4	(((((((((((.((((........&)))).)))))).).)))).	641	660	1	-18.4	1	0.0088712	0.544	2.3629	2.74381	-7.28438	15	19	6	3UTR		0	0
hsa-miR-1291	NM_016571	LGSN	((((((((((((..(.((((....&)))).)..)))...))))))))).	4652	4676	1	-23.8	1	0.00973577	0.544	3.24507	2.95096	-6.31659	17	24	9	3UTR		0	0
hsa-miR-1291	NM_016610	TLR8	((((((((((((..(.(((((((.&))))))).)..)))))....))))))).	3469	3497	1	-26	1	0.000540682	0.471	0.0107156	-0.0704573	-6.31659	20	28	7	3UTR		0	0
hsa-miR-1291	NM_016613	GASK1B	.((((((.((.((((((((((.((&)).)).))))))))....)).)))))).	3912	3940	1	-24.9	1	0.000348647	0.529	-0.287025	1.35242	-8.93173	20	28	8	3UTR		0	0
hsa-miR-1291	NM_016619	PLAC8	.(((((.((.(.(((((((((...&.))))))))).)..)).))))).	1173	1226	1	-29.2	1	0.000452373	0.441	1.65786	0.874807	-9.92632	17	23	9	3UTR		0	0
hsa-miR-1291	NM_016621	PHF21A	.((((((((((..(((((((((.(&).))))).)))))))))))..))).	5089	5114	1	-27.5	1	8.67731e-07	0.485	7.12821	6.2925	-8.42926	20	25	11	3UTR		0	0
hsa-miR-1291	NM_016625	RSRC1	((((((((.((((((((.......&.))))))))..))))...)))).	2318	2373	1	-21.5	1	0.000677001	0.647	0	0	-4.99396	16	23	8	3UTR		0	0
hsa-miR-1291	NM_016654	GABPB1	(((((((..(((....((((((.(&.).))))))..)))...))))))).	3202	3260	1	-26.7	1	0.0220584	0.426	2.2414	2.30414	-10.4221	17	25	7	3UTR		0	0
hsa-miR-1291	NM_016724	FOLR1	.(((((.((((.......(((((.&)))))....))))))))).	969	988	1	-20.2	1	2.09917e-05	0.485	-0.00989673	0.155797	-11.7983	14	19	9	3UTR		0	0
hsa-miR-1291	NM_016725	FOLR1	.(((((.((((.......(((((.&)))))....))))))))).	903	922	1	-20.2	1	2.09917e-05	0.485	-0.00989673	0.155797	-11.7983	14	19	9	3UTR		0	0
hsa-miR-1291	NM_016729	FOLR1	.(((((.((((.......(((((.&)))))....))))))))).	878	897	1	-20.2	1	2.09917e-05	0.485	-0.00989673	0.155797	-11.7983	14	19	9	3UTR		0	0
hsa-miR-1291	NM_016732	RALY	(((.((((.(((((((((((....&))))))))))).))))..))).	5662	5684	1	-25.1	1	0.000971017	0.485	-0.373027	0.0487645	-8.02599	18	22	11	3UTR		0	0
hsa-miR-1291	NM_016821	OGG1	(((((.((((((((....(((((.&)))))..))).))))).))))).	1841	1864	1	-21.9	1	0.0503043	0.618	0.383112	0.163762	-6.80703	18	23	5	3UTR		0	0
hsa-miR-1291	NM_016823	CRK	((((((((.(((.(..(((..(((&)))..)))..).))))))))))).	1852	1876	1	-27	1	0.000406204	0.515	1.76008	1.46456	-7.25159	18	24	11	3UTR		0	0
hsa-miR-1291	NM_016831	PER3	((((((((((((((((...(((((&.)))))....))))))))))).))))).	6156	6215	1	-28.3	1	0.0214353	0.676	0.622908	0.157565	-3.93757	21	28	11	3UTR		0	0
hsa-miR-1291	NM_016835	MAPT	..(((((((((((....((((((.&))))))....))))).............)))))).	3137	3172	1	-24.8	1	2.72409e-08	0.353	-0.32537	-0.546497	-6.78234	17	35	6	3UTR		0	0
hsa-miR-1291	NM_016841	MAPT	..(((((((((((....((((((.&))))))....))))).............)))))).	1919	1954	1	-24.8	1	2.72409e-08	0.353	-0.341436	-0.540377	-6.78234	17	35	6	3UTR		0	0
hsa-miR-1291	NM_016938	EFEMP2	(.(((((((((((((.(((((...&))))).................)))))))))...........................)))).).	1686	1751	1	-23.9	1	0.00435544	0.353	0.722439	1.71593	-5.3343	19	65	9	3UTR		0	0
hsa-miR-1291	NM_016948	PARD6A	.(((((((..((.((.(((((...&)))))))))))))))).	1191	1208	1	-23.9	1	5.07873e-05	0.471	0.355133	0.661501	-7.6144	16	17	16	3UTR		0	0
hsa-miR-1291	NM_017412	FZD3	.((((((((((.(((.(((.....&)))..)))....)))))))))).	13045	13068	1	-23.7	1	9.84168e-06	0.588	0.465746	0.288424	-7.37318	16	23	10	3UTR		0	0
hsa-miR-1291	NM_017431	PRKAG3	.(((((((((((((..(((((((.&))).))))...................))))))))))))).	1807	1848	1	-29	1	0.000261317	0.426	0.142025	0.26008	-4.76182	20	41	13	3UTR		0	1
hsa-miR-1291	NM_017447	C21orf91	((((((((...((((((.((.(((&))))).)))))))))))))).	1114	1135	1	-22	1	4.71625e-06	0.647	0.162582	0.458877	-9.06125	19	21	14	3UTR		0	0
hsa-miR-1291	NM_017449	EPHB2	.(((((((..((.((.(((((((.&)))))))))))))))))).	3739	3758	1	-24.9	1	7.55438e-06	0.471	0.455063	0.697817	-7.6144	18	19	18	3UTR		0	1
hsa-miR-1291	NM_017457	CYTH2	..((.(((((.(((((((......&))))))).))))).)).	4507	4524	1	-23.8	1	0.00215728	0.544	0.0809009	0.124644	-11.9008	14	17	7	3UTR		0	0
hsa-miR-1291	NM_017460	CYP3A4	.((((((.((....(.((((((((&))))))))))))))))).	2157	2175	1	-22.3	1	0.000215991	0.647	3.25323	2.01422	-14.6576	17	18	17	3UTR		0	0
hsa-miR-1291	NM_017482	ADD2	((((((.....((((.((((((((&)))).)))))))))))))).	3673	3693	1	-24	1	8.21129e-06	0.485	0.461678	0.231624	-13.1516	18	20	14	3UTR		0	0
hsa-miR-1291	NM_017488	ADD2	(((((((((((.(((..(((((((&)).)))..))..))).))))).)))))).	5164	5193	1	-26.9	1	4.54841e-05	0.485	0.168994	0.0224432	-7.51743	21	29	6	3UTR		0	0
hsa-miR-1291	NM_017490	MARK2	((((((((.(((.(((((((((((&))))))))))).)))..)))))))).	3609	3635	1	-37.6	1	1.29908e-06	0.338	0.417359	0.589958	-6.28309	22	26	11	3UTR		0	0
hsa-miR-1291	NM_017509	KLK15	.((((((...(((((..(((((((&))))))).))))).)))))).	1230	1251	1	-23.1	1	0.00543342	0.618	1.118	1.13389	-8.6389	18	21	7	3UTR		0	0
hsa-miR-1291	NM_017510	TMED9	.((((((.(((...((((((((.(&.).))))))))..))))))))).	1288	1337	1	-28.7	1	1.62941e-05	0.485	0.261677	0.409024	-11.5997	18	23	9	3UTR		0	0
hsa-miR-1291	NM_017563	IL17RD	.(((((((.((((..(((((....&))))).)))).))))))).	6813	6832	1	-25.8	1	2.10532e-05	0.529	1.46936	1.38604	-6.442	16	19	7	3UTR		0	0
hsa-miR-1291	NM_017583	TRIM44	...(((((((((((((.((((((.&))))))))))))))..................))))).	3685	3723	1	-27	1	0.0434774	0.559	2.43456	1.14558	-6.51454	19	38	14	3UTR		0	0
hsa-miR-1291	NM_017602	OTUD5	.(((((((((...(((((.((...&))..))))))))..)))))).	2821	2842	1	-24.1	1	3.26721e-07	0.515	2.77571	1.81557	-11.254	16	21	8	3UTR		0	0
hsa-miR-1291	NM_017620	ILF3	.(((((((.((((..((((((((.&))))).).))..))))))))))).	5766	5790	1	-25.7	1	1.03312e-08	0.412	-0.378425	-0.32139	-6.442	19	24	11	3UTR		0	0
hsa-miR-1291	NM_017643	MBTD1	...((((((((((((...(((...&))).)))))))))))).	2360	2377	1	-21.4	1	0.00163491	0.5	0.778952	0.711377	-6.74759	15	17	12	3UTR		0	0
hsa-miR-1291	NM_017646	TRIT1	..((((.(((((.((((.((((..&)))).))))..))))).)))).	1476	1498	1	-23.7	1	0.00013026	0.485	0.240306	-0.117869	-7.78982	17	22	5	3UTR		0	0
hsa-miR-1291	NM_017650	PPP1R9A	..((((((((((((.(((((((((&))))))).)).)))))....)))).......))).	4426	4461	1	-25.3	1	0.00256679	0.5	0.179057	1.17734	-5.69245	21	35	7	3UTR		0	0
hsa-miR-1291	NM_017650	PPP1R9A	((.((((((.(((((((..((((.&))))..))))))))))))).)).	5459	5482	1	-24	1	0.00115549	0.632	-0.0323745	0.57871	-6.73762	19	23	13	3UTR		0	0
hsa-miR-1291	NM_017653	DYM	.(((((((((.((.(((..(((((&)))))..).)).))...))))))))).	3735	3762	1	-25	1	6.82522e-06	0.397	0.103977	0.256971	-7.47494	19	27	9	3UTR		0	0
hsa-miR-1291	NM_017660	GATAD2A	.(((((((.(((.(((.((((...&)))).))).))).))))))).	4915	4936	1	-25.5	1	8.05694e-07	0.426	-0.302703	-0.489371	-6.13885	17	21	7	3UTR		0	0
hsa-miR-1291	NM_017672	TRPM7	..(((((.((...(((((((((((&))))).)))))))).).)))).	10209	10231	1	-22.2	1	0.000744679	0.588	2.4021	2.43597	-14.7313	18	22	8	3UTR		0	0
hsa-miR-1291	NM_017679	BCAS3	.(((...(((((((((((((.(((&)))))))))......)))))))...))).	2873	2902	1	-22	1	0.133699	0.441	0.138646	0.888972	-11.357	19	29	9	3UTR		0	0
hsa-miR-1291	NM_017680	ASPN	(((((((......((((((((...&.))))))))))))))).	1987	2027	1	-22.3	1	0.000705835	0.706	4.40561	2.82349	-16.0108	15	17	15	3UTR		0	0
hsa-miR-1291	NM_017691	LRRC49	.((((((.((((((..(((((((.&)))))))..).....))).)).)))))).	4620	4649	1	-25.8	1	0.000746831	0.485	0.384394	0.200566	-7.07546	19	29	7	3UTR		0	0
hsa-miR-1291	NM_017693	BIVM	((((...((..(((((((((((((&)))))))))))))..))....)))).	3387	3413	1	-23.7	1	0.0409522	0.544	0.416667	0.616793	-15.5685	19	26	13	3UTR		0	0
hsa-miR-1291	NM_017707	ASAP3	((((((((.((((((((((((...&)))))))))..................))).)))))))).	3297	3337	1	-29.4	1	0.000736262	0.426	4.01892	4.08595	-4.99396	20	40	9	3UTR		0	0
hsa-miR-1291	NM_017744	ST7L	.((((.((((((((((((.(((((&.)))))........))).))))))))).).))).	3917	3961	1	-27.1	1	0.0102515	0.559	6.04866	5.43345	-5.69428	21	34	9	3UTR		0	1
hsa-miR-1291	NM_017763	RNF43	..((((.((.(((((.(((((((.&))))))).))))))).)))).	3998	4019	1	-26.8	1	0.00060771	0.544	0.93269	1.82949	-7.97624	18	21	7	3UTR		0	1
hsa-miR-1291	NM_017768	LRRC40	((((((.(.((((..((((((((.&))))))))....)))).).)))))).	1982	2008	1	-26.6	1	0.00364839	0.632	4.31882	3.06987	-8.12994	19	26	8	3UTR		0	0
hsa-miR-1291	NM_017771	PXK	.(((((((((((..(((((.((((&))))))))).)))...)))))))).	2432	2457	1	-21.5	1	0.00160603	0.574	0.484069	0.11738	-5.9393	20	25	9	3UTR		0	0
hsa-miR-1291	NM_017773	LAX1	..((((((((((((..(((.((((&.)))).)))..)).))....)))))))).	2364	2399	1	-25.5	1	0.000545614	0.544	-0.00251307	0.210469	-5.9255	19	29	8	3UTR		0	0
hsa-miR-1291	NM_017773	LAX1	((((((((((((.......(((((&)))))......))))))).))))).	1930	1955	1	-20.1	1	0.00609976	0.588	0.305921	-0.221861	-7.05204	17	25	7	3UTR		0	0
hsa-miR-1291	NM_017779	DEPDC1	.((((((..(((((((........&))))))).)))))).	3830	3845	1	-20.2	1	7.90719e-05	0.544	0.730636	1.84433	-7.16335	13	15	7	3UTR		0	0
hsa-miR-1291	NM_017793	RPP25	.(((((.((((.....((((((((&)))))))).........................))))..))))).	2013	2058	1	-23.9	1	0.000140273	0.5	3.80943	3.78774	-11.7983	17	45	8	3UTR		0	0
hsa-miR-1291	NM_017799	TMEM260	..(((.((.(((((..(((((((.&)))))))..))))))).))).	4112	4133	1	-22.2	1	0.0132603	0.662	1.72725	2.13691	-8.88285	17	21	7	3UTR		0	1
hsa-miR-1291	NM_017824	MARCHF5	.(((((((((((((((((((((((&)))))).)))))).)))...)))))))).	3015	3044	1	-27.6	1	0.000455845	0.529	0.144027	0.246985	-3.79332	23	29	8	3UTR		0	0
hsa-miR-1291	NM_017836	SLC41A3	((((((((((((((((.((((((.&))))))))))))....)).))........)))))).	1958	1994	1	-23.6	1	0.000370887	0.441	-0.153412	0.571028	-3.93757	22	36	12	3UTR		0	0
[truncated: 37,678 more rows]
