# Supplementary material for: The Micro-RNA Cargo of Extracellular Vesicles Released by Human Adipose Tissue-Derived Mesenchymal Stem Cells Is Modified by Obesity
Source: Front Cell Dev Biol. 2021 May 20;9:660851. doi: 10.3389/fcell.2021.660851 (PMC8173369; doi:10.3389/fcell.2021.660851)
Supplement: Supplementary file 3 [file Table_2.xlsx]

## Sheet: miRWalk_miRNA_Targets (5)
mirnaid	refseqid	genesymbol	duplex	start	end	bindingp	energy	seed	accessibility	au	phylopstem	phylopflank	me	number_of_pairings	binding_region_length	longest_consecutive_pairings	position	validated	TargetScan	miRDB
hsa-miR-10525-3p	NM_032024	LRMDA	..(((..((((((((((((((&)))))).))))))))..))).	3617	3638	0.953846	-22.1	1	8.48774e-06	0.632	0	0	-8.40165	17	21	8	3UTR		0	0
hsa-miR-10525-3p	NM_207315	CMPK2	((.((.(..((((((((((..&))))))))))..)..)))).	1884	1904	0.953846	-17.6	1	0.0202554	0.485	6.0722	3.1859	-10.7661	15	20	10	3UTR		0	0
hsa-miR-10525-3p	NM_005595	NFIA	...((((((((.(((((((..&)).))))))))))))).	6760	6777	0.953846	-17.2	1	0.00185419	0.691	5.13133	4.64516	-9.86134	15	17	13	3UTR		0	0
hsa-miR-10525-3p	NM_006030	CACNA2D2	(((((((..((.(((((((..&)))))))))..))))))).	4188	4207	0.953846	-21	1	2.7098e-06	0.471	6.19279	5.49015	-10.6544	16	19	9	3UTR		0	0
hsa-miR-10525-3p	NM_006814	PSMF1	..((..((.((((((((((((&))))))))))))))..)).	6764	6783	0.953846	-22.5	1	0.000140375	0.5	-0.00792685	-0.0196283	-12.0334	16	19	14	3UTR		0	0
hsa-miR-10525-3p	NM_001323408	PSMF1	..((..((.((((((((((((&))))))))))))))..)).	5566	5585	0.953846	-22.5	1	0.000140375	0.5	-0.00792685	-0.0196283	-12.0334	16	19	14	3UTR		0	0
hsa-miR-10525-3p	NM_002240	KCNJ6	..((..((((((((((((...&.))))))))))))..)).	17801	17840	0.953846	-21	1	0.000206227	0.471	4.13667	1.84013	-10.977	14	18	12	3UTR		0	0
hsa-miR-10525-3p	NM_001005505	CACNA2D2	(((((((..((.(((((((..&)))))))))..))))))).	4194	4213	0.953846	-21	1	2.7098e-06	0.471	6.19279	5.49015	-10.6544	16	19	9	3UTR		0	0
hsa-miR-10525-3p	NM_001080467	MYO5B	...(((((((((.(((((((.&))).))))))))))))).	8433	8451	0.953846	-18.8	1	0.025436	0.662	5.95477	3.92261	-7.80367	16	18	13	3UTR		0	0
hsa-miR-10525-3p	NM_001134673	NFIA	...((((((((.(((((((..&)).))))))))))))).	6852	6869	0.953846	-17.2	1	0.00185419	0.691	5.13133	4.64516	-9.86134	15	17	13	3UTR		0	0
hsa-miR-10525-3p	NM_001145511	NFIA	...((((((((.(((((((..&)).))))))))))))).	6996	7013	0.953846	-17.2	1	0.00185419	0.691	5.13133	4.64516	-9.86134	15	17	13	3UTR		0	0
hsa-miR-10525-3p	NM_001145512	NFIA	...((((((((.(((((((..&)).))))))))))))).	6961	6978	0.953846	-17.2	1	0.00185419	0.691	5.13133	4.64516	-9.86134	15	17	13	3UTR		0	0
hsa-miR-10525-3p	NM_001174051	CACNA2D2	(((((((..((.(((((((..&)))))))))..))))))).	4209	4228	0.953846	-21	1	2.7098e-06	0.471	6.19279	5.49015	-10.6544	16	19	9	3UTR		0	0
hsa-miR-10525-3p	NM_001202469	NIPSNAP2	....(((((((((...(((((&)))))...))))))))).	1360	1378	0.953846	-15.5	1	0.0136148	0.691	5.32987	5.16903	-11.3719	14	18	9	3UTR		0	0
hsa-miR-10525-3p	NM_001256549	PCGF5	..((((((((.(((((((...&.)).))))).)))))))).	1356	1381	0.961538	-18.9	1	0.00684724	0.588	1.63734	1.568	-7.78178	15	19	8	3UTR		0	0
hsa-miR-10525-3p	NM_001256760	HTR2C	((.((((((..(((.((((((&)))))))))...)))))))).	4305	4326	0.961538	-18.1	1	0.0231019	0.676	0	0	-10.2978	17	21	9	3UTR		0	0
hsa-miR-10525-3p	NM_001256761	HTR2C	((.((((((..(((.((((((&)))))))))...)))))))).	4119	4140	0.961538	-18.1	1	0.0231019	0.676	0	0	-10.2978	17	21	9	3UTR		0	0
hsa-miR-10525-3p	NM_001257101	PCGF5	..((((((((.(((((((...&.)).))))).)))))))).	1268	1293	0.961538	-18.9	1	0.00684724	0.588	0.606732	1.33394	-7.78178	15	19	8	3UTR		0	0
hsa-miR-10525-3p	NM_001282851	HEY1	(((((((..((((((((((((&.)))).)))))))).))))))).	1685	1732	0.961538	-23.7	1	0.00553964	0.603	4.19932	4.49543	-7.3076	19	23	8	3UTR		0	0
hsa-miR-10525-3p	NM_001289003	PHLPP2	((((((((...(((.((((..&.)))).))).)))))))).	7656	7692	0.961538	-19	1	0.000202142	0.471	5.07419	3.35266	-9.79669	15	19	8	3UTR		0	0
hsa-miR-10525-3p	NM_001290265	CERS1	((.((((((((((((((((((&)))))))))))).....)))))).)).	1608	1635	0.961538	-23	1	0.000214437	0.426	3.53089	4.44591	-5.49511	20	27	12	3UTR		0	0
hsa-miR-10525-3p	NM_001292008	SSR1	.(((((((((((((((..(((&))).))))))))).)))))).	8067	8088	0.961538	-20.6	1	0.068925	0.5	1.4881	0.741606	-3.79332	18	21	9	3UTR		0	0
hsa-miR-10525-3p	NM_032373	PCGF5	..((((((((.(((((((...&.)).))))).)))))))).	1353	1378	0.961538	-18.9	1	0.00684724	0.588	1.63734	1.568	-7.78178	15	19	8	3UTR		0	0
hsa-miR-10525-3p	NM_144719	CCDC13	(.((....(((((((((((..&)))))))))))...)).).	3584	3603	0.961538	-20.9	0	0.00115432	0.485	0.422928	1.46613	-14.9786	14	19	11	3UTR		0	0
hsa-miR-10525-3p	NM_152653	UBE2E2	.(((((((..((((.((((..&))))))))..))))))).	2453	2471	0.961538	-21.6	1	1.47315e-05	0.574	-0.0720595	0.0305546	-6.82767	15	18	8	3UTR		0	0
hsa-miR-10525-3p	NM_170692	RASAL2	(((((..(((((((.((((((&))))))...)))))))..))))).	5461	5485	0.961538	-20.5	1	0.00257918	0.647	-0.131107	0.104995	-8.11767	18	24	7	3UTR		0	0
hsa-miR-10525-3p	NM_178509	STXBP4	.((((((((.(((((((((((&))))))))))).))...)))))).	13182	13206	0.961538	-23.2	1	0.047078	0.603	-0.23394	-0.0246806	-5.03583	19	24	11	3UTR		0	0
hsa-miR-10525-3p	NM_199512	CCDC80	.((((((((((((((((....&)))))))))).)))))).	7847	7865	0.961538	-16.6	1	0.00081723	0.529	0.20465	0.153709	-3.79332	16	18	10	3UTR		0	0
hsa-miR-10525-3p	NM_015020	PHLPP2	((((((((...(((.((((..&.)))).))).)))))))).	7510	7546	0.961538	-19	1	0.000202142	0.471	4.51193	3.78194	-9.79669	15	19	8	3UTR		0	0
hsa-miR-10525-3p	NM_021977	SLC22A3	.(((((((.((((((((((((&)))))))))))).).............................)))))).	1949	1999	0.961538	-23.4	1	0.000958992	0.529	-0.267411	-0.226603	-4.84971	19	50	12	3UTR		0	0
hsa-miR-10525-3p	NM_002345	LUM	(((((((.(((((((.(((..&.))))))))))))))))).	2333	2377	0.961538	-18.1	1	0.0926149	0.676	5.93825	3.42317	-6.48426	17	19	17	3UTR		0	0
hsa-miR-10525-3p	NM_004778	PTGDR2	((((((((..((.(.((((..&))))).))..)))))))).	2085	2104	0.961538	-19	1	0.000686087	0.441	-0.236752	1.62927	-8.26105	15	19	8	3UTR		0	0
hsa-miR-10525-3p	NM_004841	RASAL2	(((((..(((((((.((((((&))))))...)))))))..))))).	4794	4818	0.961538	-20.5	1	0.00257918	0.647	-0.131107	0.104995	-8.11767	18	24	7	3UTR		0	0
hsa-miR-10525-3p	NM_006813	PNRC1	.(((((((((((((..((.(.&).))..))))))))))))).	1333	1353	0.961538	-17.1	1	0.0125907	0.691	4.51568	3.87146	-4.76182	16	20	13	3UTR		0	0
hsa-miR-10525-3p	NM_007250	KLF8	((.((((.((((((((((((.&)))).)))))))))))))).	7271	7291	0.961538	-21.3	1	0.00193971	0.691	0	0	-7.80875	18	20	14	3UTR		0	0
hsa-miR-10525-3p	NM_012258	HEY1	(((((((..((((((((((((&.)))).)))))))).))))))).	1847	1894	0.961538	-23.7	1	0.00553964	0.603	4.98704	4.942	-7.3076	19	23	8	3UTR		0	0
hsa-miR-10525-3p	NM_014379	KCNV1	(((((((((.(((((((....&)))).))).))))))))).	4850	4869	0.961538	-21	1	0.000357263	0.735	4.05986	5.03357	-5.18008	16	19	9	3UTR		0	0
hsa-miR-10525-3p	NM_001324099	KLF8	((.((((.((((((((((((.&)))).)))))))))))))).	6255	6275	0.961538	-21.3	1	0.00193971	0.691	0	0	-7.80875	18	20	14	3UTR		0	0
hsa-miR-10525-3p	NM_001346032	RIPOR2	(((((((....((((((((..&)))))))))))).))).	3393	3410	0.961538	-17.2	1	0.000162551	0.515	3.02137	3.53257	-11.3749	15	17	12	3UTR		0	0
hsa-miR-10525-3p	NM_001370225	UBE2E2	.(((((((..((((.((((..&))))))))..))))))).	2476	2494	0.961538	-21.6	1	1.47315e-05	0.574	-0.0720595	0.0305546	-6.82767	15	18	8	3UTR		0	0
hsa-miR-10525-3p	NM_001375756	TFDP2	((((((((((((.((((((..&.))).))))))))))))))).	3502	3547	0.961538	-24.4	1	3.01249e-06	0.5	-0.265774	-0.260372	-5.22671	18	21	15	3UTR		0	0
hsa-miR-10525-3p	NM_000208	INSR	.(((((.(((((((((((...&)))))))).........))).))))).	6174	6201	0.961538	-19.7	1	0.000671629	0.456	3.7522	3.45364	-5.33701	16	27	8	3UTR		0	0
hsa-miR-10525-3p	NM_000610	CD44	...(((((..((((((((((.&))))))))))))))).	2630	2646	0.961538	-17.2	1	0.00092843	0.529	0.200429	0.420962	-8.81344	15	16	15	3UTR		0	0
hsa-miR-10525-3p	NM_000726	CACNB4	...(((((.((((((((((..&))).)))))))))))).	7826	7843	0.961538	-18	1	0.00318709	0.706	3.31137	2.96254	-7.57093	15	17	12	3UTR		0	0
hsa-miR-10525-3p	NM_000868	HTR2C	((.((((((..(((.((((((&)))))))))...)))))))).	4214	4235	0.961538	-18.1	1	0.0231019	0.676	0	0	-10.2978	17	21	9	3UTR		0	0
hsa-miR-10525-3p	NM_001001389	CD44	...(((((..((((((((((.&))))))))))))))).	2501	2517	0.961538	-17.2	1	0.00092843	0.529	0.200429	0.420962	-8.81344	15	16	15	3UTR		0	0
hsa-miR-10525-3p	NM_001001390	CD44	...(((((..((((((((((.&))))))))))))))).	1883	1899	0.961538	-17.2	1	0.00092843	0.529	0.200429	0.420962	-8.81344	15	16	15	3UTR		0	0
hsa-miR-10525-3p	NM_001001391	CD44	...(((((..((((((((((.&))))))))))))))).	1487	1503	0.961538	-17.2	1	0.00092843	0.529	0.200429	0.420962	-8.81344	15	16	15	3UTR		0	0
hsa-miR-10525-3p	NM_001001392	CD44	...(((((..((((((((((.&))))))))))))))).	867	883	0.961538	-17.2	1	0.00092843	0.529	0.200429	0.420962	-8.81344	15	16	15	3UTR		0	0
hsa-miR-10525-3p	NM_001040708	HEY1	(((((((..((((((((((((&.)))).)))))))).))))))).	1859	1906	0.961538	-23.7	1	0.00553964	0.603	4.98704	4.52491	-7.3076	19	23	8	3UTR		0	0
hsa-miR-10525-3p	NM_001145338	ZBTB22	.(((((((((...((((((((&))))))))))))))))).	2364	2382	0.961538	-20.3	1	5.48111e-05	0.456	3.19734	3.29315	-11.254	17	18	17	3UTR		0	0
hsa-miR-10525-3p	NM_001145971	RDH13	.(((((((.(((((((.....&.)))))))))))))).	1516	1539	0.961538	-18	1	0.029938	0.471	3.53135	2.57241	-4.84971	14	16	14	3UTR		0	0
hsa-miR-10525-3p	NM_001159296	KLF8	((.((((.((((((((((((.&)))).)))))))))))))).	6719	6739	0.961538	-21.3	1	0.00193971	0.691	0	0	-7.80875	18	20	14	3UTR		0	0
hsa-miR-10525-3p	NM_001178138	TFDP2	((((((((((((.((((((..&.))).))))))))))))))).	4028	4073	0.961538	-24.4	1	3.01249e-06	0.5	-0.304953	-0.0954773	-5.22671	18	21	15	3UTR		0	0
hsa-miR-10525-3p	NM_001178139	TFDP2	((((((((((((.((((((..&.))).))))))))))))))).	3990	4035	0.961538	-24.4	1	3.01249e-06	0.5	-0.223828	-0.0415876	-5.22671	18	21	15	3UTR		0	0
hsa-miR-10525-3p	NM_001190900	PDYN	.((((..((.(((((.(((((&))))))))))))..)))).	1554	1573	0.961538	-17.6	1	0.000333473	0.603	-0.168477	1.01953	-8.71353	16	19	12	3UTR		0	0
hsa-miR-10525-3p	NM_001198616	MAP7	((((((((.((((((......&.)))))))))))))).	3534	3554	0.961538	-17.7	1	0.113882	0.691	4.42483	3.75587	-5.22701	14	16	14	3UTR		0	0
hsa-miR-10525-3p	NM_001198618	MAP7	((((((((.((((((......&.)))))))))))))).	3809	3829	0.961538	-17.7	1	0.113882	0.691	4.14394	3.63592	-5.22701	14	16	14	3UTR		0	0
hsa-miR-10525-3p	NM_176805	MRPS11	.((((((..((((((((.((.&.))))))))))..)))))).	3223	3253	0.965812	-21.1	1	0.000649271	0.485	-0.073237	-0.301174	-7.16335	16	20	10	3UTR		0	0
hsa-miR-10525-3p	NM_022839	MRPS11	.((((((..((((((((.((.&.))))))))))..)))))).	3322	3352	0.965812	-21.1	1	0.000649271	0.485	-0.073237	-0.301174	-7.16335	16	20	10	3UTR		0	0
hsa-miR-10525-3p	NM_001290983	DLG1	.((((((((((((........&.)))))))))))).	3129	3148	0.969231	-19	1	0.0105825	0.588	5.52086	5.05335	-5.61866	12	14	12	3UTR		0	0
hsa-miR-10525-3p	NM_175061	JAZF1	.((((.((((((((..(((..&.))).)))))))))))).	3029	3054	0.969231	-17.1	1	0.000492463	0.632	1.37825	1.38192	-6.66278	15	18	12	3UTR		0	0
hsa-miR-10525-3p	NM_004087	DLG1	.((((((((((((........&.)))))))))))).	3077	3096	0.969231	-19	1	0.0105825	0.588	5.96255	3.98675	-5.61866	12	14	12	3UTR		0	0
hsa-miR-10525-3p	NM_004871	GOSR1	..(((((((((((...((((.&.)))).))))))))))).	3568	3599	0.969231	-17.8	1	0.000156357	0.588	0.263093	0.270134	-6.78234	15	18	11	3UTR		0	0
hsa-miR-10525-3p	NM_001363865	DLG1	.((((((((((((........&.)))))))))))).	3014	3033	0.969231	-19	1	0.0105825	0.588	4.30121	4.7229	-5.61866	12	14	12	3UTR		0	0
hsa-miR-10525-3p	NM_001366203	DLG1	.((((((((((((........&.)))))))))))).	3012	3031	0.969231	-19	1	0.0105825	0.588	3.64787	4.9416	-5.61866	12	14	12	3UTR		0	0
hsa-miR-10525-3p	NM_001366204	DLG1	.((((((((((((........&.)))))))))))).	2830	2849	0.969231	-19	1	0.0105825	0.588	5.91753	4.17526	-5.61866	12	14	12	3UTR		0	0
hsa-miR-10525-3p	NM_001366205	DLG1	.((((((((((((........&.)))))))))))).	2893	2912	0.969231	-19	1	0.0105825	0.588	5.91753	4.17526	-5.61866	12	14	12	3UTR		0	0
hsa-miR-10525-3p	NM_001366206	DLG1	.((((((((((((........&.)))))))))))).	2960	2979	0.969231	-19	1	0.0105825	0.588	4.42989	4.43187	-5.61866	12	14	12	3UTR		0	0
hsa-miR-10525-3p	NM_001366207	DLG1	.((((((((((((........&.)))))))))))).	2896	2915	0.969231	-19	1	0.0105825	0.588	5.91753	4.17526	-5.61866	12	14	12	3UTR		0	0
hsa-miR-10525-3p	NM_001366208	DLG1	.((((((((((((........&.)))))))))))).	2948	2967	0.969231	-19	1	0.0105825	0.588	4.30121	4.7229	-5.61866	12	14	12	3UTR		0	0
hsa-miR-10525-3p	NM_001366209	DLG1	.((((((((((((........&.)))))))))))).	3216	3235	0.969231	-19	1	0.0105825	0.588	3.54503	4.48837	-5.61866	12	14	12	3UTR		0	0
hsa-miR-10525-3p	NM_001366210	DLG1	.((((((((((((........&.)))))))))))).	3282	3301	0.969231	-19	1	0.0105825	0.588	3.54503	4.48837	-5.61866	12	14	12	3UTR		0	0
hsa-miR-10525-3p	NM_001366211	DLG1	.((((((((((((........&.)))))))))))).	3252	3271	0.969231	-19	1	0.0105825	0.588	3.54503	4.48837	-5.61866	12	14	12	3UTR		0	0
hsa-miR-10525-3p	NM_001366212	DLG1	.((((((((((((........&.)))))))))))).	3345	3364	0.969231	-19	1	0.0105825	0.588	5.09834	4.67049	-5.61866	12	14	12	3UTR		0	0
hsa-miR-10525-3p	NM_001366213	DLG1	.((((((((((((........&.)))))))))))).	3279	3298	0.969231	-19	1	0.0105825	0.588	3.54503	4.48837	-5.61866	12	14	12	3UTR		0	0
hsa-miR-10525-3p	NM_001366214	DLG1	.((((((((((((........&.)))))))))))).	3378	3397	0.969231	-19	1	0.0105825	0.588	5.19548	5.25199	-5.61866	12	14	12	3UTR		0	0
hsa-miR-10525-3p	NM_001366215	DLG1	.((((((((((((........&.)))))))))))).	3411	3430	0.969231	-19	1	0.0105825	0.588	5.09834	4.67049	-5.61866	12	14	12	3UTR		0	0
hsa-miR-10525-3p	NM_001366216	DLG1	.((((((((((((........&.)))))))))))).	3162	3181	0.969231	-19	1	0.0105825	0.588	4.3359	4.79783	-5.61866	12	14	12	3UTR		0	0
hsa-miR-10525-3p	NM_001366217	DLG1	.((((((((((((........&.)))))))))))).	3381	3400	0.969231	-19	1	0.0105825	0.588	5.09834	4.67049	-5.61866	12	14	12	3UTR		0	0
hsa-miR-10525-3p	NM_001366219	DLG1	.((((((((((((........&.)))))))))))).	3291	3310	0.969231	-19	1	0.0105825	0.588	5.40741	4.95661	-5.61866	12	14	12	3UTR		0	0
hsa-miR-10525-3p	NM_001366221	DLG1	.((((((((((((........&.)))))))))))).	2672	2691	0.969231	-19	1	0.0105825	0.588	3.2149	3.89588	-5.61866	12	14	12	3UTR		0	0
hsa-miR-10525-3p	NM_001366222	DLG1	.((((((((((((........&.)))))))))))).	2636	2655	0.969231	-19	1	0.0105825	0.588	3.67311	4.71247	-5.61866	12	14	12	3UTR		0	0
hsa-miR-10525-3p	NM_001007024	GOSR1	..(((((((((((...((((.&.)))).))))))))))).	3584	3615	0.969231	-17.8	1	0.000156357	0.588	0.263093	0.270134	-6.78234	15	18	11	3UTR		0	0
hsa-miR-10525-3p	NM_001007025	GOSR1	..(((((((((((...((((.&.)))).))))))))))).	3562	3593	0.969231	-17.8	1	0.000156357	0.588	0.263093	0.270134	-6.78234	15	18	11	3UTR		0	0
hsa-miR-10525-3p	NM_001098424	DLG1	.((((((((((((........&.)))))))))))).	3011	3030	0.969231	-19	1	0.0105825	0.588	5.96255	3.98675	-5.61866	12	14	12	3UTR		0	0
hsa-miR-10525-3p	NM_001204386	DLG1	.((((((((((((........&.)))))))))))).	2975	2994	0.969231	-19	1	0.0105825	0.588	4.74666	4.02205	-5.61866	12	14	12	3UTR		0	0
hsa-miR-10525-3p	NM_001204388	DLG1	.((((((((((((........&.)))))))))))).	2537	2556	0.969231	-19	1	0.0105825	0.588	6.27844	5.25034	-5.61866	12	14	12	3UTR		0	0
hsa-miR-10525-3p	NM_001282715	OLFML2A	(((((((((((.(((((((..&.))))..)).).))))))))))).	3623	3673	0.974359	-22	1	0.000292398	0.368	0.198993	0.677275	-7.28438	18	24	11	3UTR		0	0
hsa-miR-10525-3p	NM_182487	OLFML2A	(((((((((((.(((((((..&.))))..)).).))))))))))).	4229	4279	0.974359	-22	1	0.000292398	0.368	0.198993	0.677275	-7.28438	18	24	11	3UTR		0	0
hsa-miR-10525-3p	NM_198562	C3orf62	...(((((((.((((((((..&.)))))))).))))))).	1426	1465	0.974359	-21.5	1	8.52046e-07	0.515	0.167826	0.0311439	-9.33931	15	18	8	3UTR		0	0
hsa-miR-10525-3p	XM_017000683	NTNG1	((.((((...(((((((((((&))))))))))).)))).)).	2475	2495	0.974359	-20.4	1	0.000478722	0.574	0	0	-10.1076	17	20	11	3UTR		0	0
hsa-miR-10525-3p	XM_024450656	ZNF652	((.(((((((.((((((((..&))))))))))))))))).	3415	3433	0.974359	-21	1	6.16722e-05	0.5	0	0	-8.31989	17	18	17	3UTR		0	0
hsa-miR-10525-3p	NM_020726	NLN	.(((((.((((((.(((((..&)))))....))))))))))).	6639	6660	0.974359	-19.2	1	0.0738086	0.529	-0.276781	0.206971	-6.19385	16	21	11	3UTR		0	0
hsa-miR-10525-3p	NM_020919	ALS2	.(((.(((((((((((.((((&)))).)))))))))))))).	5585	5605	0.974359	-22	1	0.000978701	0.485	0.682534	0.605051	-7.91236	18	20	14	3UTR		0	0
hsa-miR-10525-3p	NM_002504	NFX1	.((((((.(.(((((((((..&)))))))))).)))))).	4417	4435	0.974359	-21.2	1	0.00553553	0.515	-0.342123	0.0371722	-7.34947	16	18	10	3UTR		0	0
hsa-miR-10525-3p	NM_003720	PSMG1	.((((((((((.(((((((..&.))).)))))))))))))).	1245	1276	0.974359	-21.2	1	0.000870915	0.426	3.21684	2.53055	-7.14013	17	20	14	3UTR		0	0
hsa-miR-10525-3p	NM_003754	EIF3F	.((((.((((((((.((((..&))))..)))))))).)))).	3434	3454	0.974359	-24.8	1	0.0204235	0.5	-0.102546	-0.122799	-6.42973	16	20	8	3UTR		0	0
hsa-miR-10525-3p	NM_000911	OPRD1	((((((((((.((((((....&))))))))))))).))).	5115	5133	0.974359	-20.3	1	2.02577e-05	0.471	-0.190104	-0.0555891	-6.76235	16	18	13	3UTR		0	0
hsa-miR-10525-3p	NM_001135179	ZDHHC3	((((..((((((.((((((..&))))))))))))..)))).	9870	9889	0.974359	-22.1	1	5.85412e-05	0.471	0	0	-11.2467	16	19	12	3UTR		0	0
hsa-miR-10525-3p	NM_001164347	ZBTB20	...((((((((.((((((((.&)))))))))))))))).	5420	5437	0.974359	-22.2	1	8.16524e-06	0.574	0.00413233	-0.213397	-9.86134	16	17	16	3UTR		0	0
hsa-miR-10525-3p	NM_001171873	UGT3A1	...((((((((((.((((((.&)))))).)))))))))).	1854	1872	0.974359	-21.4	1	0.0092275	0.529	0.0588038	0.0336196	-7.37138	16	18	10	3UTR		0	0
hsa-miR-10525-3p	NM_001202439	NCR3LG1	.(((.(((((((((.((((..&)))))))))))))))).	6177	6194	0.974359	-21.9	1	7.27173e-06	0.5	0	0	-8.64781	16	17	16	3UTR		0	0
hsa-miR-10525-3p	NM_012426	SF3B3	.(((.(((((((.((((((..&))).))).))))))).))).	9552	9572	0.974359	-19.7	1	1.64442e-06	0.515	0.982829	0.258259	-9.20149	16	20	7	3UTR		0	0
hsa-miR-10525-3p	NM_207344	SPRYD4	.(((((((((((((((.....&))))))..))))))))).	3205	3223	0.980769	-21.2	1	0.00276989	0.471	5.17939	3.10033	-3.79332	15	18	9	3UTR		0	0
hsa-miR-10525-3p	XM_005255955	CHST6	...((((((.(((((((((((&)))))))))))...)))))).	2130	2151	0.980769	-25.2	1	0.00541679	0.426	0	0	-7.75705	17	21	11	3UTR		0	0
hsa-miR-10525-3p	NM_025205	MED28	.(((((.(((((((.((((..&.)))).))))))).))))).	2590	2612	0.980769	-21.2	1	0.000282261	0.441	-0.459171	-0.0125495	-6.07246	16	20	7	3UTR		0	0
hsa-miR-10525-3p	NM_006703	NUDT3	.(((((((.((((((((((..&)))))))).)).))))))).	1913	1933	0.980769	-22.8	1	0.003328	0.529	-0.428621	-0.220596	-4.84971	17	20	8	3UTR		0	0
hsa-miR-10525-3p	NM_007186	CEP250	.((((((((.(((((((((..&))).)))))).)))))))).	15050	15070	0.980769	-22	1	0.000206926	0.426	-0.550592	0.0784102	-5.03583	17	20	8	3UTR		0	0
hsa-miR-10525-3p	NM_001859	SLC31A1	.(((((.((((.((((((((.&))))))))))))..))))).	4021	4041	0.980769	-23.1	1	0.00763802	0.485	0.51446	0.163858	-8.68381	17	20	12	3UTR		0	0
hsa-miR-10525-3p	NM_001130924	TMEM201	.(((((.((((((((((((..&))))..))))))))))))).	2755	2775	0.980769	-23	1	0.000385357	0.368	-0.793913	-0.564878	-5.33701	17	20	13	3UTR		0	0
hsa-miR-10525-3p	NM_001253676	TBPL1	...((((((((..((((((..&.))))))..)))))))).	4212	4239	1	-22.5	1	0.0125748	0.515	0	0	-11.1505	14	18	8	3UTR		0	0
hsa-miR-10525-3p	NM_001253884	ALPK1	...(((((.(((.((((((..&)))))).)))))))).	4991	5007	1	-18.7	1	0.0361562	0.515	-0.208078	0.141377	-8.86006	14	16	8	3UTR		0	0
hsa-miR-10525-3p	NM_001256135	CSE1L	.((((((((((((((.(((..&.)))))))))..)))))))).	3306	3339	1	-20.4	1	0.0455436	0.662	1.50647	1.76955	-4.02637	17	21	9	3UTR		0	0
hsa-miR-10525-3p	NM_001256141	FSBP	((.((((((((((((......&.)))))))))))).)).	4771	4791	1	-17.8	1	0.0461476	0.618	3.13549	2.90222	-5.72816	14	17	12	3UTR		0	0
hsa-miR-10525-3p	NM_001256167	ZNF620	.(((.(((.((((((((((((&)))))))))...))).)))..))).	2333	2358	1	-20.9	1	9.86621e-05	0.647	0.356288	0.212631	-8.96875	18	25	9	3UTR		0	0
hsa-miR-10525-3p	NM_001256271	VSX1	((((((((((((((..(((..&.)))..))))).)))))).))).	1226	1277	1	-19.7	1	0.0180721	0.441	4.31942	3.31461	-4.90607	17	23	6	3UTR		0	0
hsa-miR-10525-3p	NM_001256272	VSX1	((((((((((((((..(((..&.)))..))))).)))))).))).	1424	1458	1	-19.7	1	0.0180721	0.441	4.10134	3.07876	-4.90607	17	23	6	3UTR		0	0
hsa-miR-10525-3p	NM_001256316	CHST9	.(((((((((.((((((((((&)))))))))))))))).))).	4180	4201	1	-20.6	1	0.0167548	0.662	-0.00080292	0.0239999	-6.6181	19	21	16	3UTR		0	0
hsa-miR-10525-3p	NM_001256405	KDM2A	((((((..((((((((.....&))))))))....)))))).	4589	4608	1	-18.4	1	0.0163232	0.544	1.25815	0.852271	-7.7949	14	19	8	3UTR		0	0
hsa-miR-10525-3p	NM_001256427	PDLIM5	(((((((((.((.(((((...&))))))).))))))))).	1600	1618	1	-17.3	1	0.00418927	0.559	0.417192	0.206644	-6.46921	16	18	9	3UTR		0	0
hsa-miR-10525-3p	NM_001256648	ZNF43	.....(((((((.((((((((&)))))))).))))))).	4189	4206	1	-19	1	0.0252412	0.721	0	0	-14.9547	15	17	8	3UTR		0	0
hsa-miR-10525-3p	NM_001257135	LIF	...((..(((.((((((((((&)))))))))).)...))..)).	1304	1326	1	-18.9	1	0.000547559	0.412	1.13046	0.769756	-12.784	15	22	10	3UTR		0	0
hsa-miR-10525-3p	NM_001257160	CEP41	(((......((((((((((((&)))))))))))).....))).	1236	1257	1	-18.7	0	0.00045972	0.676	-0.106514	0.131612	-17.9033	15	21	12	3UTR		0	0
hsa-miR-10525-3p	NM_001258205	TRPV3	(((((..((((.((((((((.&))))))))..))))....))))).	5153	5177	1	-20.1	1	0.000167712	0.544	2.40209	3.10276	-10.729	17	24	8	3UTR		0	0
hsa-miR-10525-3p	NM_001258392	CLPB	((.((((((((((((.(((..&)))..)))))))))))))).	5666	5686	1	-21.8	1	0.0017542	0.529	0.303269	0.337634	-5.72816	17	20	14	3UTR		0	0
hsa-miR-10525-3p	NM_001258393	CLPB	((.((((((((((((.(((..&)))..)))))))))))))).	5579	5599	1	-21.8	1	0.0017542	0.529	0.175817	0.244777	-5.72816	17	20	14	3UTR		0	0
hsa-miR-10525-3p	NM_001258394	CLPB	((.((((((((((((.(((..&)))..)))))))))))))).	5863	5883	1	-21.8	1	0.0017542	0.529	0	0	-5.72816	17	20	14	3UTR		0	0
hsa-miR-10525-3p	NM_001258432	NDRG1	.(((((((((((.((......&)).))))))))))).	1940	1955	1	-17.3	1	0.0015865	0.603	6.08101	5.00159	-5.3155	13	15	11	3UTR		0	0
hsa-miR-10525-3p	NM_001259	CDK6	.((((.(((.(((.(((((((&))))))).)))))).)))).	3590	3610	1	-19	1	0.0198436	0.559	0.708747	0.783937	-7.79363	17	20	7	3UTR		0	0
hsa-miR-10525-3p	NM_001261418	EIF2B3	(((((((((((((((((((..&.))))))))))..........))))).)))).	1512	1556	1	-22.8	1	0.000715937	0.529	5.05342	4.11107	-3.93757	19	32	10	3UTR		0	0
hsa-miR-10525-3p	NM_001261839	TTPAL	(((((((((.((((.((((((&)))))).........)))).))))))))).	1636	1666	1	-20.3	1	0.00337865	0.529	-0.0324097	0.250734	-5.91553	19	30	9	3UTR		0	0
hsa-miR-10525-3p	NM_001261839	TTPAL	((.(((((.((((((((((..&))))))))))..))))).)).	1863	1884	1	-19.7	1	0.0373951	0.544	-0.0687729	0.194309	-6.5515	17	21	10	3UTR		0	0
hsa-miR-10525-3p	NM_001265	CDX2	(((((.((....(((((((..&.)))))))....))..))))).	2463	2510	1	-19.5	1	5.97617e-05	0.426	4.47297	4.87351	-14.309	14	22	7	3UTR		0	0
hsa-miR-10525-3p	NM_001267614	GPR161	(.(((((.(((((((.(((((&))))).))))))).))))).).	5898	5920	1	-20.3	1	0.000109239	0.515	0.0373824	-0.349806	-7.64793	18	22	7	3UTR		0	0
hsa-miR-10525-3p	NM_001267708	ZNF706	...(((((..(((((((((((&)))))))))))..))))).	1272	1291	1	-19.9	1	0.00404341	0.515	0.789093	0.670039	-8.81344	16	19	11	3UTR		0	0
hsa-miR-10525-3p	NM_001267709	ZNF706	...(((((..(((((((((((&)))))))))))..))))).	1243	1262	1	-19.9	1	0.00404341	0.515	0.409388	0.863574	-8.81344	16	19	11	3UTR		0	0
hsa-miR-10525-3p	NM_001269	RCC1	((..((((((((((((.....&))))))))))))..)).	2007	2024	1	-17	1	0.00559192	0.426	-0.740392	0.586498	-8.52714	14	17	12	3UTR		0	0
hsa-miR-10525-3p	NM_001269050	CTCFL	((((((.(((((((..((...&))..))))))).)))))).	1841	1860	1	-17.9	1	9.13485e-05	0.632	3.35204	3.39602	-6.44976	15	19	7	3UTR		0	0
hsa-miR-10525-3p	NM_001270528	RNF111	(((((((.((.((((.(((((&))))).)))).)).))))))).	3989	4011	1	-23.8	1	0.000374496	0.632	1.12286	1.79827	-9.30903	18	22	7	3UTR		0	0
hsa-miR-10525-3p	NM_001270531	WTAP	.(((((.(((((((((((...&.))))))))))).))))).	1474	1512	1	-20.7	1	0.0939485	0.721	3.39347	1.91244	-5.33701	16	19	11	3UTR		0	1
hsa-miR-10525-3p	NM_001270572	CSNK1G3	.((((((((.(((((((((((&)))))))))...)).)).)))))).	2675	2700	1	-23	1	0.00148031	0.559	1.85408	1.0176	-5.03583	19	25	9	3UTR		0	0
hsa-miR-10525-3p	NM_001270573	CSNK1G3	.((((((((.(((((((((((&)))))))))...)).)).)))))).	2641	2666	1	-23	1	0.00148031	0.559	1.85408	1.0176	-5.03583	19	25	9	3UTR		0	0
hsa-miR-10525-3p	NM_001270574	CSNK1G3	.((((((((.(((((((((((&)))))))))...)).)).)))))).	2533	2558	1	-23	1	0.00148031	0.559	1.85408	1.0176	-5.03583	19	25	9	3UTR		0	0
hsa-miR-10525-3p	NM_001270726	BCL2L13	...(((((.(((((.((((..&)))))))))))))).	3125	3140	1	-19.2	1	1.3075e-05	0.5	0.147921	0.444574	-8.30638	14	15	14	3UTR		0	0
hsa-miR-10525-3p	NM_001270727	BCL2L13	...(((((.(((((.((((..&)))))))))))))).	2981	2996	1	-19.2	1	1.3075e-05	0.5	0.147921	0.444574	-8.30638	14	15	14	3UTR		0	0
hsa-miR-10525-3p	NM_001270728	BCL2L13	...(((((.(((((.((((..&)))))))))))))).	2788	2803	1	-19.2	1	1.3075e-05	0.5	0.2471	-0.23817	-8.30638	14	15	14	3UTR		0	0
hsa-miR-10525-3p	NM_001270729	BCL2L13	...(((((.(((((.((((..&)))))))))))))).	2966	2981	1	-19.2	1	1.3075e-05	0.5	0.2471	-0.23817	-8.30638	14	15	14	3UTR		0	0
hsa-miR-10525-3p	NM_001270731	BCL2L13	...(((((.(((((.((((..&)))))))))))))).	3053	3068	1	-19.2	1	1.3075e-05	0.5	0.2471	-0.23817	-8.30638	14	15	14	3UTR		0	0
hsa-miR-10525-3p	NM_001270732	BCL2L13	...(((((.(((((.((((..&)))))))))))))).	2896	2911	1	-19.2	1	1.3075e-05	0.5	0.2471	-0.23817	-8.30638	14	15	14	3UTR		0	0
hsa-miR-10525-3p	NM_001270734	BCL2L13	...(((((.(((((.((((..&)))))))))))))).	2909	2924	1	-19.2	1	1.3075e-05	0.5	0.2471	-0.23817	-8.30638	14	15	14	3UTR		0	0
hsa-miR-10525-3p	NM_001270735	BCL2L13	...(((((.(((((.((((..&)))))))))))))).	2752	2767	1	-19.2	1	1.3075e-05	0.5	0.2471	-0.23817	-8.30638	14	15	14	3UTR		0	0
hsa-miR-10525-3p	NM_001270934	JAKMIP2	......((.((((((((((..&)))))))))).)).	5203	5217	1	-19.6	0	0.000363256	0.559	0.596481	0.843904	-16.6229	12	14	10	3UTR		0	0
hsa-miR-10525-3p	NM_001270941	JAKMIP2	......((.((((((((((..&)))))))))).)).	5266	5280	1	-19.6	0	0.000363256	0.559	1.03134	0.725816	-16.6229	12	14	10	3UTR		0	0
hsa-miR-10525-3p	NM_001270974	HYDIN	.(((((((((((((..(((((&))))))))))))).........))))).	19654	19682	1	-19.4	1	0.0276937	0.544	1.39884	2.27783	-4.76182	18	28	13	3UTR		0	0
hsa-miR-10525-3p	NM_001271581	DNAJC10	((((((((((((((((((...&.)))))))))))).....)))))).	12788	12841	1	-26.8	1	0.00636112	0.5	-0.305257	-0.0735114	-3.93757	18	25	12	3UTR		0	0
hsa-miR-10525-3p	NM_001271893	TWIST2	(((((((((((((((((....&.)))).))).)))))))))).	819	876	1	-20.6	1	0.00983171	0.529	0.188232	-0.354959	-3.93757	17	21	10	3UTR		0	0
hsa-miR-10525-3p	NM_001272042	RPS6KB1	((((..((((((((((.((((&)))).))).)))))))..)))).	4035	4058	1	-20.5	1	0.000251617	0.603	0.769338	1.22355	-9.95757	18	23	7	3UTR		0	0
hsa-miR-10525-3p	NM_001272043	RPS6KB1	((((..((((((((((.((((&)))).))).)))))))..)))).	3068	3091	1	-20.5	1	0.000251617	0.603	2.67898	3.23364	-9.95757	18	23	7	3UTR		0	0
hsa-miR-10525-3p	NM_001272044	RPS6KB1	((((..((((((((((.((((&)))).))).)))))))..)))).	4233	4256	1	-20.5	1	0.000251617	0.603	0.769338	1.22355	-9.95757	18	23	7	3UTR		0	0
hsa-miR-10525-3p	NM_001272071	AP1S2	((..((((((((((.......&))))))))))..)).	900	915	1	-15.7	1	0.0314228	0.721	0.271052	0.408171	-9.49563	12	15	10	3UTR		0	0
hsa-miR-10525-3p	NM_001277308	GOLGA8O	.((((.(((((((((((((((&))))).)))))))))))))).	2243	2264	1	-20.6	1	0.00123282	0.574	1.23454	1.29085	-5.69428	19	21	14	3UTR		0	0
hsa-miR-10525-3p	NM_001277731	AOC3	...((.((((((.(((((...&))))).)))))).)).	3247	3263	1	-18.7	1	0.023309	0.456	0.405753	-0.270647	-9.70463	13	16	6	3UTR		0	0
hsa-miR-10525-3p	NM_001277842	CCNT1	.(((((.(((..((((((((.&))))))))..)))))))).	5013	5032	1	-20.4	1	0.0202868	0.662	0.593166	2.78385	-11.5086	16	19	8	3UTR		0	0
hsa-miR-10525-3p	NM_001277961	STIM1	.(((((.((((((((.((((.&.)))))))))))).))))).	3177	3213	1	-20.1	1	0.00121359	0.441	0.224976	1.19232	-5.57006	17	20	12	3UTR		0	0
hsa-miR-10525-3p	NM_001277962	STIM1	.(((((.((((((((.((((.&.)))))))))))).))))).	2935	2971	1	-20.1	1	0.00121359	0.441	0.224976	1.19232	-5.57006	17	20	12	3UTR		0	0
hsa-miR-10525-3p	NM_001278064	GRM1	((.((((((.(((((((....&.))))))))))))))).	5163	5186	1	-19.7	1	0.00307159	0.706	0.515881	1.3799	-6.73762	15	17	15	3UTR		0	0
hsa-miR-10525-3p	NM_001278065	GRM1	((.((((((.(((((((....&.))))))))))))))).	5234	5257	1	-19.7	1	0.00307159	0.706	0.515881	1.3799	-6.73762	15	17	15	3UTR		0	0
hsa-miR-10525-3p	NM_001278066	GRM1	((.((((((.(((((((....&.))))))))))))))).	5077	5100	1	-19.7	1	0.00307159	0.706	0.515881	1.3799	-6.73762	15	17	15	3UTR		0	0
hsa-miR-10525-3p	NM_001278067	GRM1	((.((((((.(((((((....&.))))))))))))))).	4992	5015	1	-19.7	1	0.00307159	0.706	0.515881	1.3799	-6.73762	15	17	15	3UTR		0	0
hsa-miR-10525-3p	NM_001278172	SDHC	...(((((..(((((((((..&)))))))))....))))).	4251	4270	1	-19.4	1	0.0140876	0.529	-0.144332	0.930473	-8.81344	14	19	9	3UTR		0	0
hsa-miR-10525-3p	NM_001278231	ZNF189	..(((.(.(((((((((((..&))))))))))).).))).	2919	2937	1	-21.6	1	0.000298602	0.603	0.64997	0.595178	-9.17159	15	18	11	3UTR		0	0
hsa-miR-10525-3p	NM_001278240	ZNF189	..(((.(.(((((((((((..&))))))))))).).))).	3040	3058	1	-21.6	1	0.000298602	0.603	0.887574	0.627849	-9.17159	15	18	11	3UTR		0	0
hsa-miR-10525-3p	NM_001278282	RPE	.((.((((.(((((((((.((&)).))))))))).)))).)).	1170	1191	1	-20.1	1	0.000842143	0.662	0.778187	0.391062	-7.88174	17	21	9	3UTR		0	0
hsa-miR-10525-3p	NM_001278283	RPE	.((.((((.(((((((((.((&)).))))))))).)))).)).	1250	1271	1	-20.1	1	0.000842143	0.662	0.778187	0.391062	-7.88174	17	21	9	3UTR		0	0
hsa-miR-10525-3p	NM_001278285	RPE	.((.((((.(((((((((.((&)).))))))))).)))).)).	1078	1099	1	-20.1	1	0.000842143	0.662	0.778187	0.391062	-7.88174	17	21	9	3UTR		0	0
hsa-miR-10525-3p	NM_001278286	RPE	.((.((((.(((((((((.((&)).))))))))).)))).)).	1094	1115	1	-20.1	1	0.000842143	0.662	0.778187	0.391062	-7.88174	17	21	9	3UTR		0	0
hsa-miR-10525-3p	NM_001278288	RPE	.((.((((.(((((((((.((&)).))))))))).)))).)).	1085	1106	1	-20.1	1	0.000842143	0.662	0.778187	0.391062	-7.88174	17	21	9	3UTR		0	0
hsa-miR-10525-3p	NM_001278549	PDK1	(((((.((((((..(((((..&.))))).)))))).))))).	9181	9216	1	-21.4	1	0.0268063	0.544	-0.430126	0.0874995	-7.9845	16	20	6	3UTR		0	0
hsa-miR-10525-3p	NM_001278625	CRNKL1	(((.((.(((((((((.....&.))))))))).)).))).	3855	3879	1	-17.4	1	0.00049364	0.691	5.72096	4.3311	-8.51328	14	18	9	3UTR		0	0
hsa-miR-10525-3p	NM_001278628	CRNKL1	(((.((.(((((((((.....&.))))))))).)).))).	3500	3524	1	-17.4	1	0.00049364	0.691	5.52554	5.69642	-8.51328	14	18	9	3UTR		0	0
hsa-miR-10525-3p	NM_001278650	B3GALT5	((((((((((..(((((((..&.))))))).....)))))))))).	8646	8686	1	-24.3	1	0.000573371	0.588	0	0	-10.1092	17	24	10	3UTR		0	0
hsa-miR-10525-3p	NM_001278661	ZNF254	(((((((((.(((..((((..&))))..)))..))))))))).	3996	4017	1	-18.4	1	0.00434018	0.779	-0.526702	-0.49307	-6.77237	16	21	9	3UTR		0	0
hsa-miR-10525-3p	NM_001278727	RFXANK	(((((((..(((...(((((.&)))))..)))..))))))).	1189	1209	1	-18.7	1	0.0412686	0.441	1.00839	2.32563	-10.189	15	20	7	3UTR		0	0
hsa-miR-10525-3p	NM_001278728	RFXANK	(((((((..(((...(((((.&)))))..)))..))))))).	914	934	1	-18.7	1	0.0412686	0.441	3.45103	3.73154	-10.189	15	20	7	3UTR		0	0
hsa-miR-10525-3p	NM_001280560	ANP32E	.......(((((((((((((.&))))))))))))).	1651	1665	1	-17.2	0	0.0289603	0.676	0.251033	0.523642	-17.1102	13	14	13	3UTR		0	0
hsa-miR-10525-3p	NM_001281726	BTD	.(((((((.((((((((....&.)))))))).).)))))).	2288	2313	1	-21.1	1	0.000569898	0.485	0.103468	0.13559	-4.84971	15	19	8	3UTR		0	0
hsa-miR-10525-3p	NM_001282146	NLGN4X	...((((((((((((((((..&))))))).....))))))))).	3285	3307	1	-20.4	1	1.72457e-05	0.485	2.61174	2.82225	-6.51454	16	22	9	3UTR		0	0
hsa-miR-10525-3p	NM_001282189	UBXN8	.((((.(((((((((((((((&))))))))))))))).)))).	1196	1217	1	-21.4	1	0.000737352	0.676	0.0396377	0.109521	-5.69428	19	21	15	3UTR		0	0
hsa-miR-10525-3p	NM_001282199	UBXN8	.((((.(((((((((((((((&))))))))))))))).)))).	1184	1205	1	-21.4	1	0.000737352	0.676	0.0396377	0.109521	-5.69428	19	21	15	3UTR		0	0
hsa-miR-10525-3p	NM_001282307	STK25	(.((((((((.(((((((...&.))))))).)))))))).).	3354	3389	1	-23.9	1	2.52111e-05	0.5	0	0	-7.92602	16	20	8	3UTR		0	0
hsa-miR-10525-3p	NM_001282359	ZNF107	(((((((((.(((..((((..&))))..))).))))))))).	5541	5561	1	-17.6	1	0.00519019	0.765	0.469089	0.0315921	-6.77237	16	20	9	3UTR		0	0
hsa-miR-10525-3p	NM_001282360	ZNF107	(((((((((.(((..((((..&))))..))).))))))))).	5445	5465	1	-17.6	1	0.00519019	0.765	0.469089	0.0315921	-6.77237	16	20	9	3UTR		0	0
hsa-miR-10525-3p	NM_001282380	ARPIN	(.(((((..((((((((....&)))))))).))))).).	3492	3509	1	-19.7	1	0.00221799	0.485	0.0386248	-0.0143478	-8.47127	14	17	8	3UTR		0	0
hsa-miR-10525-3p	NM_001282394	WNK2	(((((((.(((((((......&))))))).))))))).	7996	8012	1	-19.1	1	0.000304346	0.515	0.495567	1.17702	-6.48426	14	16	7	3UTR		0	0
hsa-miR-10525-3p	NM_001282431	ARL4C	((((((((((((.(((((...&.)).))))))))))))))).	2445	2486	1	-21.4	1	5.64957e-06	0.559	-0.203691	0.187075	-5.22671	17	20	15	3UTR		0	0
hsa-miR-10525-3p	NM_001282472	GOLGA8J	.((((.(((((((((((((((&))))).)))))))))))))).	2244	2265	1	-20.6	1	0.00123282	0.574	1.73783	1.21218	-5.69428	19	21	14	3UTR		0	0
hsa-miR-10525-3p	NM_001282484	GOLGA8R	.((((.(((((((((((((((&))))).)))))))))))))).	2240	2261	1	-20.6	1	0.00123282	0.574	0.475229	-0.123406	-5.69428	19	21	14	3UTR		0	0
hsa-miR-10525-3p	NM_001282490	GOLGA8H	.((((.(((((((((((((((&))))).)))))))))))))).	2242	2263	1	-20.6	1	0.00123282	0.574	0.729205	1.00438	-5.69428	19	21	14	3UTR		0	0
hsa-miR-10525-3p	NM_001282493	GOLGA8K	.((((.(((((((((((((((&))))).)))))))))))))).	2237	2258	1	-20.6	1	0.00123282	0.574	0	0	-5.69428	19	21	14	3UTR		0	0
hsa-miR-10525-3p	NM_001282551	BTBD3	.(((((.(((((((((.....&)))))))))))))).	1691	1706	1	-19.2	1	0.000217695	0.5	0.672694	2.23494	-5.33701	14	15	14	3UTR		0	0
hsa-miR-10525-3p	NM_001282801	SENP7	....(((((((((.(((((..&)))))))))))))).	3443	3458	1	-20	1	0.0155874	0.603	0.974024	0.8777	-10.4034	14	15	14	3UTR		0	0
hsa-miR-10525-3p	NM_001282802	SENP7	....(((((((((.(((((..&)))))))))))))).	3591	3606	1	-20	1	0.0155874	0.603	0.954107	1.48443	-10.4034	14	15	14	3UTR		0	0
hsa-miR-10525-3p	NM_001282803	SENP7	....(((((((((.(((((..&)))))))))))))).	3198	3213	1	-20	1	0.0155874	0.603	2.1877	2.1769	-10.4034	14	15	14	3UTR		0	0
hsa-miR-10525-3p	NM_001282850	PPP4R3B	..(((((.((((((((((...&.))))))))))))))).	4567	4599	1	-19.9	1	0.00679575	0.632	4.97202	5.07557	-7.27064	15	17	15	3UTR		0	0
hsa-miR-10525-3p	NM_001282902	TRPS1	.(((.((((((((((((....&))).)))))))))))).	7676	7693	1	-17	1	0.00161448	0.647	5.23787	5.3372	-7.91236	15	17	12	3UTR		0	0
hsa-miR-10525-3p	NM_001283014	NUDT13	((((((.((.(((((((((..&.))))))))))))))))).	1411	1432	1	-21.1	1	0.000641843	0.706	0.145037	0.0976003	-6.72377	17	19	17	3UTR		0	0
hsa-miR-10525-3p	NM_001283015	NUDT13	((((((.((.(((((((((..&.))))))))))))))))).	1566	1587	1	-21.1	1	0.000641843	0.706	0.145037	0.0976003	-6.72377	17	19	17	3UTR		0	0
hsa-miR-10525-3p	NM_001283016	NUDT13	((((((.((.(((((((((..&.))))))))))))))))).	1750	1771	1	-21.1	1	0.000641843	0.706	0.393977	0.285445	-6.72377	17	19	17	3UTR		0	0
hsa-miR-10525-3p	NM_001283017	NUDT13	((((((.((.(((((((((..&.))))))))))))))))).	1643	1664	1	-21.1	1	0.000641843	0.706	0.393977	0.285445	-6.72377	17	19	17	3UTR		0	0
hsa-miR-10525-3p	NM_001283026	NAPB	.((((((...(((((((((..&.))))))))).)))))).	2549	2580	1	-23.7	1	1.09754e-05	0.456	0.282003	0.0167481	-8.40586	15	18	9	3UTR		0	0
hsa-miR-10525-3p	NM_001283049	USP8	.(((((((.((((((((....&)))))))).).)))))).	5465	5483	1	-21.1	1	4.04314e-05	0.471	-0.873774	-0.150779	-4.84971	15	18	8	3UTR		0	0
hsa-miR-10525-3p	NM_001284210	MED6	((.((((((.((((.((((..&)))))))).)))))))).	1598	1616	1	-17.7	1	0.00148942	0.441	3.26726	1.56489	-7.47307	16	18	8	3UTR		0	0
hsa-miR-10525-3p	NM_001284230	MAP3K9	.(((.(((.(((((((((...&))))))))))))))).	3902	3918	1	-18	1	1.31013e-05	0.412	0.432394	0.172638	-8.96875	15	16	15	3UTR		0	0
hsa-miR-10525-3p	NM_001284231	MAP3K9	...((((((.(((((((((..&)))))))..)).)))))).	5828	5847	1	-20.1	1	0.000951936	0.529	-0.0976596	-0.0947131	-7.75705	15	19	7	3UTR		0	0
hsa-miR-10525-3p	NM_001284234	GTDC1	.(((((((((.(((.((((..&)))).))).))))))))).	5946	5965	1	-21.7	1	0.00032373	0.485	-0.340315	-0.0933215	-7.35355	16	19	9	3UTR		0	0
hsa-miR-10525-3p	NM_001284235	GTDC1	.((((.((((((((.......&)))))))))))).	1356	1369	1	-16.1	1	0.025687	0.647	-0.0702993	0.0853426	-6.66278	12	13	12	3UTR		0	0
hsa-miR-10525-3p	NM_001284240	CCSER2	.(((((.((.((((((((.(.&).)))))))))).))))).	6958	6977	1	-20.6	1	0.000220531	0.559	-0.386563	-0.00106666	-6.57952	16	19	10	3UTR		0	0
hsa-miR-10525-3p	NM_001284243	CCSER2	.(((((.((.((((((((.(.&).)))))))))).))))).	5189	5208	1	-20.6	1	0.000220531	0.559	-0.386563	-0.00106666	-6.57952	16	19	10	3UTR		0	0
hsa-miR-10525-3p	NM_001284337	RRP12	....((((((((((.((((..&.)))))))))))))).	4204	4222	1	-20.8	1	0.000903125	0.515	4.5079	3.77991	-10.282	14	16	14	3UTR		0	0
hsa-miR-10525-3p	NM_001284403	PTCD2	.(((....(((.((((((((.&)))))))))))....))).	4402	4421	1	-20.3	1	0.0134798	0.5	0.0467172	-0.128844	-17.0174	14	19	11	3UTR		0	0
hsa-miR-10525-3p	NM_001284404	PTCD2	.(((....(((.((((((((.&)))))))))))....))).	4532	4551	1	-20.3	1	0.0134798	0.5	0	0	-17.0174	14	19	11	3UTR		0	0
hsa-miR-10525-3p	NM_001284405	PTCD2	.(((....(((.((((((((.&)))))))))))....))).	4650	4669	1	-20.3	1	0.0134798	0.5	0	0	-17.0174	14	19	11	3UTR		0	0
hsa-miR-10525-3p	NM_001285399	AIPL1	((((((((.((.((.((((..&)))))))))))))))).	2617	2634	1	-20.6	1	0.00628214	0.382	3.72415	3.92145	-9.07622	16	17	16	3UTR		0	0
hsa-miR-10525-3p	NM_001285400	AIPL1	((((((((.((.((.((((..&)))))))))))))))).	2587	2604	1	-20.6	1	0.00628214	0.382	4.11993	3.6648	-9.07622	16	17	16	3UTR		0	0
hsa-miR-10525-3p	NM_001286035	ARNT	...(((.(((((((.((((..&)))))))))))))).	4686	4701	1	-17.9	1	0.000302319	0.485	1.02271	0.81165	-8.79368	14	15	14	3UTR		0	0
hsa-miR-10525-3p	NM_001286036	ARNT	...(((.(((((((.((((..&)))))))))))))).	4639	4654	1	-17.9	1	0.000302319	0.485	2.38607	1.80107	-8.79368	14	15	14	3UTR		0	0
hsa-miR-10525-3p	NM_001286050	FAM168A	(((((.((..(((((((((((&)))))))))))..))..))))).	3284	3307	1	-24.4	1	3.0659e-05	0.515	0.312444	0.591897	-8.13743	18	23	11	3UTR		0	0
hsa-miR-10525-3p	NM_001286167	FANCA	((.(((((..(((((((((..&)))))))))))))).)).	4869	4887	1	-20.7	1	9.19374e-06	0.456	2.11277	1.5388	-7.79401	16	18	14	3UTR		0	0
hsa-miR-10525-3p	NM_001286229	DTL	.(((((((((.(((((((((.&)))))))))))))).)))).	2944	2964	1	-22.6	1	0.00463184	0.647	0.446792	0.435582	-6.6181	18	20	14	3UTR		0	0
hsa-miR-10525-3p	NM_001286230	DTL	.(((((((((.(((((((((.&)))))))))))))).)))).	3048	3068	1	-22.6	1	0.00463184	0.647	0.446792	0.435582	-6.6181	18	20	14	3UTR		0	0
hsa-miR-10525-3p	NM_001286407	RPUSD2	((((((((.((((((.((...&)).)))))).)))))))).	1951	1970	1	-18.6	1	0.0068504	0.691	0	0	-5.22701	16	19	8	3UTR		0	0
hsa-miR-10525-3p	NM_001286409	SCML4	...(((((((((((.......&.))))))))))).	2455	2474	1	-18	1	0.00126159	0.515	0.838139	0.191607	-7.48304	11	13	11	3UTR		0	0
hsa-miR-10525-3p	NM_001286514	ATF7IP	.(((((((.((((((((((..&.))))))))))))))))).	5085	5116	1	-26.5	1	0.0293184	0.5	0.0617227	0.0517	-4.84971	17	19	17	3UTR		0	0
hsa-miR-10525-3p	NM_001286615	ANO4	((.((((((((((((......&)))))))))))).)).	3502	3518	1	-17.3	1	0.00243086	0.603	0	0	-5.72816	14	16	12	3UTR		0	1
hsa-miR-10525-3p	NM_001286790	CNOT6L	(((((.((((((((((.((..&.)).))))))))))))))).	4889	4914	1	-20.6	1	0.00303964	0.544	2.10194	3.44188	-5.83853	17	20	15	3UTR		0	0
hsa-miR-10525-3p	NM_001287183	HNF4A	((((((((.((..((((....&))))..)))))))))).	1643	1660	1	-18.7	1	1.4095e-06	0.397	0.479678	0.60381	-9.6299	14	17	10	3UTR		0	0
hsa-miR-10525-3p	NM_001287218	RPS6KC1	.((((((((((((.(((((..&.))))))))....))))))))).	4872	4909	1	-19.3	1	0.00189561	0.529	2.92569	1.81042	-4.65016	17	23	9	3UTR		0	0
hsa-miR-10525-3p	NM_001287219	RPS6KC1	.((((((((((((.(((((..&.))))))))....))))))))).	4911	4948	1	-19.3	1	0.00189561	0.529	2.92569	1.81042	-4.65016	17	23	9	3UTR		0	0
hsa-miR-10525-3p	NM_001287220	RPS6KC1	.((((((((((((.(((((..&.))))))))....))))))))).	4706	4743	1	-19.3	1	0.00189561	0.529	2.92569	1.81042	-4.65016	17	23	9	3UTR		0	0
hsa-miR-10525-3p	NM_001287221	RPS6KC1	.((((((((((((.(((((..&.))))))))....))))))))).	4766	4803	1	-19.3	1	0.00189561	0.529	2.92569	1.81042	-4.65016	17	23	9	3UTR		0	0
hsa-miR-10525-3p	NM_001287252	CCNI2	(((((((....((((((((..&))))))))..))))))).	2290	2308	1	-21.1	1	0.00160391	0.588	0.415189	-0.156353	-11.3749	15	18	8	3UTR		0	0
hsa-miR-10525-3p	NM_001287512	TTC26	.((((((((.(((((.(((((&.))))))))))...)))))))).	3758	3791	1	-19.2	1	0.0170712	0.676	0.227361	0.347426	-5.26888	18	23	10	3UTR		0	0
hsa-miR-10525-3p	NM_001288582	TTC14	(((..((((((((((((((..&))))))))))))))...))).	2326	2347	1	-20.1	1	0.00910385	0.647	-0.227696	0.110666	-11.0886	17	21	14	3UTR		0	0
hsa-miR-10525-3p	NM_001288787	TOM1L2	...((((((.(((((((((..&))))......))))))))))).	1938	1960	1	-18	1	0.00362478	0.426	-0.233167	-0.516152	-7.75705	15	22	11	3UTR		0	0
hsa-miR-10525-3p	NM_001289133	BTBD7	((((((.((((((((......&)))))))).)))))).	3195	3211	1	-18.2	1	0.000388688	0.529	1.99861	1.30641	-5.71431	14	16	8	3UTR		0	0
hsa-miR-10525-3p	NM_001289823	FURIN	((.(((((.((((((((((..&))))))))))))))))).	3141	3159	1	-21.7	1	0.000113733	0.353	-0.325172	-0.239682	-6.5515	17	18	17	3UTR		0	0
hsa-miR-10525-3p	NM_001289824	FURIN	((.(((((.((((((((((..&))))))))))))))))).	3320	3338	1	-21.7	1	0.000113733	0.353	-0.325172	-0.239682	-6.5515	17	18	17	3UTR		0	0
hsa-miR-10525-3p	NM_001290214	CTBP2	(((((((((.((((.......&))))))))))))).	3672	3686	1	-16.7	1	0.0135681	0.515	-0.115669	0.21229	-6.14858	13	14	13	3UTR		0	1
hsa-miR-10525-3p	NM_001290223	DOCK1	(((((((((((((((((((..&.)))).))))).)))))))))).	5960	5985	1	-22	1	0.0147963	0.456	-0.741389	-0.271327	-3.93757	19	23	10	3UTR		0	0
hsa-miR-10525-3p	NM_001291101	CACNA2D2	...((((..((.(((((((((&))))))))).)))))).	4911	4928	1	-18.1	1	0.00498865	0.647	2.97442	3.5894	-13.2314	15	17	9	3UTR		0	0
hsa-miR-10525-3p	NM_001291858	IGF1R	...(((((((((((..(....&)..))))))))))).	9339	9354	1	-18.8	1	8.11229e-05	0.559	1.26964	0.967885	-7.48304	12	15	11	3UTR		0	0
hsa-miR-10525-3p	NM_001291932	SEC14L2	.((((.(.((((((((((((.&))))))))...)))).)..)))).	4051	4075	1	-19.5	1	0.000927838	0.515	0.213087	0.0774945	-8.00792	17	24	8	3UTR		0	0
hsa-miR-10525-3p	NM_001292048	RAB5A	.(((((((((((((.((((..&.))))))...))))))))))).	2001	2038	1	-17.2	1	0.000382305	0.662	2.15697	3.19663	-4.52877	17	22	11	3UTR		0	0
hsa-miR-10525-3p	NM_001293642	CA12	...(((((((((((.......&))))))))))).	5370	5382	1	-17.9	1	0.00422828	0.441	0	0	-7.48304	11	12	11	3UTR		0	0
hsa-miR-10525-3p	NM_001297622	HNRNPR	.((((((((.(.(((((....&.))))).)..)))))))).	2567	2594	1	-19.1	1	0.116086	0.735	0	0	-8.38263	14	19	8	3UTR		0	0
hsa-miR-10525-3p	NM_001300746	TMEM53	((((((((((.((((((....&.))))))))))))).))).	1252	1292	1	-20	1	2.09014e-05	0.426	0.34327	0.333727	-6.76235	16	19	13	3UTR		0	0
hsa-miR-10525-3p	NM_001300747	TMEM53	((((((((((.((((((....&.))))))))))))).))).	1284	1324	1	-20	1	2.09014e-05	0.426	0.0357698	1.42866	-6.76235	16	19	13	3UTR		0	0
hsa-miR-10525-3p	NM_001300771	LYPLAL1	.(((((((((((((((.....&.)))))))))).))))).	2016	2054	1	-18.6	1	0.0288981	0.721	0	0	-3.79332	15	18	10	3UTR		0	0
hsa-miR-10525-3p	NM_001300823	PRDM5	.(((((((((.((((.((((.&)))).)))).)...)))))))).	2603	2626	1	-20	1	0.000155944	0.706	0.0440591	0.300403	-6.85115	17	23	8	3UTR		0	0
hsa-miR-10525-3p	NM_001300851	RC3H1	(((((.((((((((((((((.&.)))))).))))).))).))))).	9229	9259	1	-21	1	0.00908415	0.559	3.17959	3.1271	-5.83853	19	24	6	3UTR		0	0
hsa-miR-10525-3p	NM_001300863	TEX38	...((((....((((((((((&))))))))))..)))).	654	671	1	-20	1	0.0966329	0.5	0.4188	0.522325	-13.9518	14	17	10	3UTR		0	0
hsa-miR-10525-3p	NM_001300864	TEX38	...((((....((((((((((&))))))))))..)))).	582	599	1	-20	1	0.0966329	0.5	0.4188	0.522325	-13.9518	14	17	10	3UTR		0	0
hsa-miR-10525-3p	NM_001300936	SRSF10	.((((..(((((((((((...&))))))))))).)))).	2689	2706	1	-19.4	1	0.0903605	0.691	1.30601	1.07452	-7.23797	15	17	11	3UTR		0	0
hsa-miR-10525-3p	NM_001300941	C12orf66	...((((((...(((((((..&))))))))))))).	2337	2351	1	-17.4	1	0.000699194	0.529	0.57488	0.360225	-13.9286	13	14	13	3UTR		0	0
hsa-miR-10525-3p	NM_001300985	PTBP2	...((((((((.((((((((.&)))))))).)))))))).	4300	4318	1	-24	1	0.000149954	0.529	0.504048	0.0892473	-9.86134	16	18	8	3UTR		0	0
hsa-miR-10525-3p	NM_001300986	PTBP2	...((((((((.((((((((.&)))))))).)))))))).	4309	4327	1	-24	1	0.000149954	0.529	0.504048	0.0892473	-9.86134	16	18	8	3UTR		0	0
hsa-miR-10525-3p	NM_001300989	PTBP2	...((((((((.((((((((.&)))))))).)))))))).	4285	4303	1	-24	1	0.000149954	0.529	0.504048	0.0892473	-9.86134	16	18	8	3UTR		0	0
hsa-miR-10525-3p	NM_001301036	TMCC3	.....((((((.(((((((..&))))))))))))).	5669	5683	1	-18.3	1	0.000471796	0.676	0.530054	1.47835	-17.0124	13	14	13	3UTR		0	0
hsa-miR-10525-3p	NM_001301084	ARHGEF12	(((((((((((.((.......&))))))))))))).	7179	7193	1	-17.2	1	2.99836e-05	0.574	0.248034	-0.0879059	-8.25288	13	14	13	3UTR		0	0
hsa-miR-10525-3p	NM_001301129	POLR2F	(((((.(((((((((((((..&.))))))).))))))))))).	1358	1392	1	-22.8	1	0.00242271	0.441	-0.0995039	-0.12632	-5.83853	18	21	11	3UTR		0	0
hsa-miR-10525-3p	NM_001303497	SAMD9L	.((((((((((((.(((....&))))))))))))...))).	5878	5897	1	-17.7	1	0.0373706	0.662	0.717059	0.775039	-4.65016	15	19	12	3UTR		0	0
hsa-miR-10525-3p	NM_001303618	CD226	...((((((.((((((((((.&)))))))))).)))))).	9219	9237	1	-21.1	1	0.0140343	0.721	-0.0362228	-0.0419868	-7.75705	16	18	10	3UTR		0	0
hsa-miR-10525-3p	NM_001304284	USP6	(((((((..(((((.((((..&)))).)))))..))))))).	7468	7488	1	-23.2	1	0.00315127	0.485	0.714097	0.919388	-8.04305	16	20	7	3UTR		0	0
hsa-miR-10525-3p	NM_001304331	PPFIA4	(((((((((.(((((((.(((&)))..))))).......)).))))))))).	6293	6323	1	-19.5	1	0.00976942	0.588	0.208205	0.459179	-5.18008	19	30	9	3UTR		0	1
hsa-miR-10525-3p	NM_001304420	SLMAP	((((((((((((((((..(((&.)))..))))).))))))))))).	4810	4842	1	-21	1	0.000895522	0.676	1.93222	1.47785	-3.93757	19	24	11	3UTR		0	0
hsa-miR-10525-3p	NM_001304421	SLMAP	((((((((((((((((..(((&.)))..))))).))))))))))).	3954	3986	1	-21	1	0.000895522	0.676	1.93222	1.47785	-3.93757	19	24	11	3UTR		0	0
hsa-miR-10525-3p	NM_001304548	CFAP47	..(((((((((((((((((..&.)))))))))))).))))).	9846	9868	1	-20.5	1	0.00725953	0.721	0.105432	-0.0903687	-4.957	17	20	12	3UTR		0	0
hsa-miR-10525-3p	NM_001304782	CRTAM	.(((((((.((((((((....&.)))))))).).)))))).	1248	1282	1	-21.1	1	5.79388e-05	0.471	-0.104201	-0.27695	-4.84971	15	19	8	3UTR		0	0
hsa-miR-10525-3p	NM_001305581	LRMDA	..(((..((((((((((((((&)))))).))))))))..))).	3587	3608	1	-22.1	1	8.48774e-06	0.632	0.988257	1.66862	-8.40165	17	21	8	3UTR		0	0
hsa-miR-10525-3p	NM_001306093	ZADH2	.(((((((((.((((((....&.))))))))))))))).	6048	6086	1	-20.9	1	1.8885e-05	0.456	0.629259	1.05687	-6.6181	15	17	15	3UTR		0	0
hsa-miR-10525-3p	NM_001307975	TMPO	(((((((.((((.((((((..&))))))..))))))))))).	3803	3823	1	-21.1	1	0.0206009	0.691	0.125307	1.50376	-7.54034	17	20	11	3UTR		0	0
hsa-miR-10525-3p	NM_001307979	PRICKLE3	.(((((((.(.(.(((((((.&))))))).).)))))))).	2592	2611	1	-18.6	1	0.000131625	0.5	1.92788	2.90148	-8.96362	16	19	8	3UTR		0	0
hsa-miR-10525-3p	NM_001307986	ST8SIA5	(((((.((.((((((((....&)))))))).)).))))).	9595	9613	1	-19.2	1	0.0101402	0.5	-0.0627032	-0.150779	-6.89492	15	18	8	3UTR		0	0
hsa-miR-10525-3p	NM_001307987	ST8SIA5	(((((.((.((((((((....&)))))))).)).))))).	9394	9412	1	-19.2	1	0.0101402	0.5	-0.194405	0.0196092	-6.89492	15	18	8	3UTR		0	0
hsa-miR-10525-3p	NM_001308006	LIPG	((((((.((((((((.(((((&.))))).)))))))).)))))).	3625	3670	1	-20.6	1	0.0238517	0.588	0.017621	0.157075	-5.71431	19	23	8	3UTR		0	0
hsa-miR-10525-3p	NM_001308044	RBM23	(((((((.((((.(((((...&))))))))).))))))).	5055	5073	1	-18.3	1	0.000153442	0.574	0.494964	0.0854946	-7.54034	16	18	9	3UTR		0	0
hsa-miR-10525-3p	NM_001308112	KLHL28	.((((((((((((((((((..&.))))))))).))))))))).	4317	4353	1	-23.1	1	0.0018479	0.676	0.658074	0.343073	-3.79332	18	21	9	3UTR		0	0
hsa-miR-10525-3p	NM_001308154	RAB15	(.(((((((.((((.((((..&))))))))))))).)).).	2549	2568	1	-18.4	1	0.00311954	0.574	1.81739	1.80767	-7.07921	16	19	13	3UTR		0	0
hsa-miR-10525-3p	NM_001308213	ZNF346	(((((((....((((((((..&)))))))))))).))).	2587	2604	1	-16.7	1	0.00099868	0.471	0.398276	0.103145	-11.3749	15	17	12	3UTR		0	0
hsa-miR-10525-3p	NM_001308223	ZNF346	(((((((....((((((((..&)))))))))))).))).	1984	2001	1	-16.7	1	0.00099868	0.471	0.398276	0.103145	-11.3749	15	17	12	3UTR		0	0
hsa-miR-10525-3p	NM_001308248	EVI5	......((.((((((((((..&)))))))))).)).	4811	4825	1	-18.9	0	0.000307897	0.529	0.66949	1.52297	-16.6229	12	14	10	3UTR		0	0
hsa-miR-10525-3p	NM_001308269	ZNF121	......(((((.(((((((..&)))))))))))).	1826	1839	1	-19.3	0	0.00537071	0.559	-0.201344	-0.00579444	-18.9134	12	13	12	3UTR		0	0
hsa-miR-10525-3p	NM_001310	CREBL2	(((((((((((((((.(((((&))))).))))))))))............................))))).	3552	3602	1	-18.2	1	0.00392823	0.691	0.552254	0.53537	-4.17062	20	50	10	3UTR		0	0
hsa-miR-10525-3p	NM_001311178	SLMAP	((((((((((((((((..(((&.)))..))))).))))))))))).	2543	2584	1	-21	1	0.000895522	0.676	1.75917	1.13237	-3.93757	19	24	11	3UTR		0	0
hsa-miR-10525-3p	NM_001311179	SLMAP	.((((((((((((((.(((..&.))).)))))))))))))).	1034	1095	1	-23.5	1	0.0332607	0.574	1.69713	2.64488	-4.02637	17	20	14	3UTR		0	0
hsa-miR-10525-3p	NM_001313858	ARL6IP1	((.((((((((.(((((....&))))).)))))))))).	2111	2128	1	-18.3	1	0.000323724	0.721	5.19608	3.75618	-8.84192	15	17	10	3UTR		0	0
hsa-miR-10525-3p	NM_001313959	AFF1	.((((((..(((((((((...&))))))))).)))))).	4324	4341	1	-17.8	1	0.00485025	0.721	0.334456	1.32937	-7.16335	15	17	9	3UTR		0	0
hsa-miR-10525-3p	NM_001314052	KLF4	((((((((((((((.......&))))....)))))))))).	2238	2257	1	-18	1	0.00244448	0.5	1.18755	0.907359	-4.90607	14	19	10	3UTR		0	0
hsa-miR-10525-3p	NM_001314057	MBNL1	(((((((.(.(((.(((((..&))))))))).))))))).	2834	2852	1	-18	1	0.00284615	0.574	3.10941	2.81166	-8.35056	16	18	9	3UTR		0	0
hsa-miR-10525-3p	NM_001316	CSE1L	.((((((((((((((.(((..&.)))))))))..)))))))).	3474	3507	1	-20.4	1	0.0455436	0.662	1.27205	1.37103	-4.02637	17	21	9	3UTR		0	0
hsa-miR-10525-3p	NM_001316321	CCDC57	...(((((((((((.((((((&))))))))).)))).)))).	5714	5734	1	-19.2	1	0.00732882	0.426	0.130032	1.47505	-7.24999	17	20	9	3UTR		0	0
hsa-miR-10525-3p	NM_001317086	ZPR1	......((.((((((((((..&)))))))))).)).	4670	4684	1	-18.9	0	0.000324329	0.559	0.306727	0.196971	-16.6229	12	14	10	3UTR		0	0
hsa-miR-10525-3p	NM_001317122	AGO1	(((((((.((((((((((...&.))))))))))))))))).	12330	12359	1	-23.5	1	0.00223268	0.559	0	0	-6.25121	17	19	17	3UTR		0	0
hsa-miR-10525-3p	NM_001317123	AGO1	(((((((.((((((((((...&.))))))))))))))))).	12235	12264	1	-23.5	1	0.00223268	0.559	0	0	-6.25121	17	19	17	3UTR		0	0
hsa-miR-10525-3p	NM_001317851	HEMK1	((((((((.((((((((((..&))))))).....))))))))))).	9093	9117	1	-23.1	1	0.00410238	0.5	0	0	-4.99396	18	24	11	3UTR		0	0
hsa-miR-10525-3p	NM_001317860	OIP5	((((((.(....(((((((..&)))))))..).)))))).	650	668	1	-19.8	1	0.00496159	0.618	2.46948	1.42013	-13.9517	14	18	7	3UTR		0	0
hsa-miR-10525-3p	NM_001317944	BSPRY	.(((((((((((.(((((...&))))).))))))))))).	1689	1707	1	-21	1	0.00790461	0.456	0.0754797	-0.280051	-5.08246	16	18	11	3UTR		0	0
hsa-miR-10525-3p	NM_001318040	ZNF618	((.(((...(((((((((((.&)))))))))))...))))).	3284	3304	1	-20.3	1	0.00104152	0.529	2.03156	2.11344	-10.4088	16	20	11	3UTR		0	0
hsa-miR-10525-3p	NM_001318042	ZNF618	((.(((...(((((((((((.&)))))))))))...))))).	3383	3403	1	-20.3	1	0.00104152	0.529	3.73392	1.93025	-10.4088	16	20	11	3UTR		0	0
hsa-miR-10525-3p	NM_001318051	NDUFS4	.((((((((..((((((((((&)))))..)))))....)))))))).	516	541	1	-19.6	1	0.00238345	0.676	4.09156	2.86606	-7.86061	18	25	8	3UTR		0	0
hsa-miR-10525-3p	NM_030636	EEPD1	.((..(((((((((.((((..&))))..))))))))).)).	4084	4103	1	-20.4	1	4.53652e-05	0.426	0.0341394	0.1245	-11.6798	15	19	9	3UTR		0	0
hsa-miR-10525-3p	NM_030806	C1orf21	.(((((.((.(((((((....&)))))))))...))))).	3443	3461	1	-17.3	1	0.00160423	0.515	0.300375	0.425929	-6.57952	14	18	9	3UTR		0	0
hsa-miR-10525-3p	NM_030807	SLC2A11	(.(((((((((((((((((..&)))))))...))).))).)))).).	1776	1801	1	-18.5	1	0.00138839	0.529	0.360231	0.0227379	-5.10125	18	25	7	3UTR		0	0
hsa-miR-10525-3p	NM_030810	TXNDC5	(((((((((..(((((.....&.)))))..))))))))).	1507	1530	1	-17.3	1	0.00652071	0.662	0.640983	0.126028	-8.00486	14	18	9	3UTR		0	0
hsa-miR-10525-3p	NM_030813	CLPB	((.((((((((((((.(((..&)))..)))))))))))))).	5756	5776	1	-21.8	1	0.0017542	0.529	0.153057	0.209273	-5.72816	17	20	14	3UTR		0	0
hsa-miR-10525-3p	NM_030920	ANP32E	.......(((((((((((((.&))))))))))))).	1872	1886	1	-17.2	0	0.0289603	0.676	1.49421	0.983508	-17.1102	13	14	13	3UTR		0	0
hsa-miR-10525-3p	NM_030927	TSPAN14	..((((.((((((((((((..&))).))))))))).)))).	2382	2401	1	-18.9	1	0.00032212	0.574	0.509817	0.277668	-6.50069	16	19	9	3UTR		0	0
hsa-miR-10525-3p	NM_030961	TRIM56	(((((((....((((((((..&))))))))))))))).	8038	8054	1	-20.9	1	0.000915274	0.544	-0.212439	0.0392814	-11.3749	15	16	15	3UTR		0	0
hsa-miR-10525-3p	NM_031422	CHST9	.(((((((((.((((((((((&)))))))))))))))).))).	4218	4239	1	-20.6	1	0.0167548	0.662	0.197622	0.0232914	-6.6181	19	21	16	3UTR		0	0
hsa-miR-10525-3p	NM_031442	TMEM47	..(((((((((((..((((..&))))..)))))).))))).	2456	2475	1	-18.8	1	0.209461	0.676	1.28238	1.87508	-6.54929	15	19	6	3UTR		0	0
hsa-miR-10525-3p	NM_031445	AMMECR1L	...(((((((((((.(((((.&)))))..).)))))))))).	2112	2132	1	-20.3	1	0.0457429	0.529	0.195612	0.653213	-7.24999	16	20	10	3UTR		0	0
hsa-miR-10525-3p	NM_031480	RIOK1	...((((((.((((..(((..&.)))..)))))))))).	2249	2268	1	-18.9	1	2.15489e-05	0.588	0.0280257	0.149345	-8.72555	13	17	10	3UTR		0	0
hsa-miR-10525-3p	NM_032043	BRIP1	(((....((((((((((((..&))))))))))))....))).	7407	7427	1	-18.2	0	0.0106147	0.632	2.80347	2.13365	-14.5333	15	20	12	3UTR		0	0
hsa-miR-10525-3p	NM_032144	RAB6C	..((((((.((((((((((((&)))))))...))))))))))).	2266	2288	1	-20.6	1	0.151692	0.588	0.0995423	0.255207	-6.01339	18	22	11	3UTR		0	0
hsa-miR-10525-3p	NM_032153	ZIC4	..(((((((.(((((((((..&)).)))))))..))))))).	1307	1327	1	-20.4	1	0.0122492	0.559	4.85587	4.69975	-6.19951	16	20	7	3UTR		0	0
hsa-miR-10525-3p	NM_032180	FAM161A	((.((((.(((((((((((..&))))))))))).)))))).	3343	3362	1	-19.4	1	0.000328793	0.691	0.868922	1.67115	-7.80875	17	19	11	3UTR		0	0
hsa-miR-10525-3p	NM_032294	CAMKK1	(((.((((((((((((((...&)))))))))))..))).))).	3073	3094	1	-18	1	6.2077e-05	0.412	4.38432	3.41321	-6.9696	17	21	11	3UTR		0	0
hsa-miR-10525-3p	NM_032299	DCUN1D5	(((((((((((.((.......&)).))))))))))).	1431	1446	1	-17.9	1	0.000229219	0.559	-0.00240364	0.0990491	-8.25288	13	15	11	3UTR		0	0
hsa-miR-10525-3p	NM_032324	NTPCR	(((((.((((.(((.((((..&))))))).)))).))))).	3312	3331	1	-19.5	1	0.0040095	0.456	-0.233908	-0.368392	-9.39876	16	19	7	3UTR		0	0
hsa-miR-10525-3p	NM_032338	LLPH	...((((((.((((((((((.&))))))).))).)))).)).	4130	4150	1	-20.1	1	0.00545534	0.515	0.689689	0.519668	-7.75705	16	20	7	3UTR		0	0
hsa-miR-10525-3p	NM_032357	CCDC115	(((((..((((((.(((((..&))))).))))))))))).	830	848	1	-19.2	1	0.0622334	0.529	0.0393306	-0.16352	-8.23906	16	18	11	3UTR		0	0
hsa-miR-10525-3p	NM_032361	THOC3	.((....((((((((((((((&)))))).))))))))....)).	1289	1311	1	-19.5	0	0.000942651	0.588	3.36403	3.69625	-14.389	16	22	8	3UTR		0	0
hsa-miR-10525-3p	NM_032410	HOOK3	.(((((((.((((((((((..&)))))))))).))))))).	9393	9412	1	-21.2	1	0.000321173	0.676	0.043878	0.370144	-4.84971	17	19	10	3UTR		0	0
hsa-miR-10525-3p	NM_032410	HOOK3	((((((((((((((..(((..&.))))))))))))....))))).	4669	4705	1	-19.4	1	0.00234649	0.441	-0.274903	-0.0456664	-4.90607	17	23	12	3UTR		0	0
hsa-miR-10525-3p	NM_032427	MAML2	.(((((((((((((((.....&.)))))))))))...)))).	6773	6798	1	-17.6	1	0.0662884	0.618	1.76286	2.01356	-3.79332	15	20	11	3UTR		0	0
hsa-miR-10525-3p	NM_032440	LCOR	......((((((((.((((((&)))))))))))))).	2708	2723	1	-17.5	0	0.0335124	0.574	4.07306	3.17784	-16.302	14	15	14	3UTR		0	0
hsa-miR-10525-3p	NM_032493	AP1M1	.(((.((((..((((((((..&)))))))).....))))))).	10615	10636	1	-19.7	1	0.00111671	0.544	0.0818892	0.150007	-11.9796	15	21	8	3UTR		0	0
hsa-miR-10525-3p	NM_032528	ST6GAL2	((.(((((((((((.((((..&))))..)))))))).))))).	2523	2544	1	-21.2	1	0.00369047	0.5	0.780904	0.470142	-6.23056	17	21	8	3UTR		0	0
hsa-miR-10525-3p	NM_032737	LMNB2	.(((((.((((((..(((...&)))..))))))))))).	2666	2683	1	-17.4	1	8.71767e-05	0.441	1.01558	1.08792	-6.9293	14	17	11	3UTR		0	0
hsa-miR-10525-3p	NM_032741	AGPAT1	......(((((((((((((((&))))))))).))).))).	1732	1750	1	-18.2	0	0.00438695	0.426	2.00727	2.50506	-15.5666	15	18	9	3UTR		0	0
hsa-miR-10525-3p	NM_032782	HAVCR2	.(((((((((((((.((.(((&.))).)))))))))))).))).	1242	1294	1	-21.2	1	0.00025091	0.574	0.359729	0.0570022	-4.52877	18	22	12	3UTR		0	0
hsa-miR-10525-3p	NM_032797	AIFM2	...((((((((((((((((..&))))))))))....................)))))).	1798	1835	1	-19.8	1	0.000243844	0.574	0.0835911	-0.101063	-6.51454	16	37	10	3UTR		0	0
hsa-miR-10525-3p	NM_032816	CEP89	..(((...(((((((((((..&)))))))))))...))).	5540	5558	1	-20.1	1	4.39891e-05	0.426	3.34864	2.82455	-10.7153	14	18	11	3UTR		0	0
hsa-miR-10525-3p	NM_032816	CEP89	((((((((((.((((((....&))))))))))))).))).	2676	2694	1	-20.3	1	0.00213677	0.5	0.111694	-0.178524	-6.76235	16	18	13	3UTR		0	0
hsa-miR-10525-3p	NM_032826	SLC35B4	.(((((.((((((.(((((((&)))))))...))))))))))).	3498	3520	1	-19.7	1	0.00352076	0.529	-0.287434	0.00735091	-6.19385	18	22	11	3UTR		0	0
hsa-miR-10525-3p	NM_032838	ZNF566	.(((((((((((.((((....&.)))).))))))))))).	1949	1997	1	-24	1	0.00014962	0.647	0.0501016	-0.145083	-5.08246	15	18	11	3UTR		0	0
hsa-miR-10525-3p	NM_032867	MICALCL	....(((((.(((((((((..&)))))))))))))).	2962	2977	1	-17.7	1	0.00306706	0.691	2.1929	1.91924	-10.7891	14	15	14	3UTR		0	0
hsa-miR-10525-3p	NM_032900	ARHGAP19	..(((.((((((((((((((.&)))))))).)))))).))).	2128	2148	1	-19.3	1	0.00276919	0.662	0.0294863	0.19331	-6.85796	17	20	8	3UTR		0	0
hsa-miR-10525-3p	NM_032959	POLR2J2	((((((((..((((.((....&.)))))))))))))).	996	1038	1	-17.7	1	8.96706e-06	0.294	0.470882	0.352209	-6.97192	14	16	14	3UTR		0	0
hsa-miR-10525-3p	NM_032968	PCDH11X	......(.(((((((((((..&))))))))))).).	6002	6016	1	-17.8	0	0.00186251	0.574	0	0	-17.8802	12	14	11	3UTR		0	0
hsa-miR-10525-3p	NM_032969	PCDH11X	......(.(((((((((((..&))))))))))).).	5972	5986	1	-17.8	0	0.00186251	0.574	0	0	-17.8802	12	14	11	3UTR		0	0
hsa-miR-10525-3p	NM_032973	PCDH11Y	......(.(((((((((((..&))))))))))).).	6665	6679	1	-17.8	0	0.000978784	0.574	0	0	-17.8802	12	14	11	3UTR		0	0
hsa-miR-10525-3p	NM_032992	CASP6	.(((((((((((.(((((...&.)))))..))))))))))).	1014	1065	1	-21.7	1	0.00273982	0.735	0.496591	2.78784	-5.08246	16	20	11	3UTR		0	0
hsa-miR-10525-3p	NM_033029	LMLN	((((((.(((((((..((...&.))..))))))).)))))).	5522	5554	1	-20.3	1	0.00311008	0.559	0.395448	0.202192	-6.44976	15	20	7	3UTR		0	1
hsa-miR-10525-3p	NM_033056	PCDH15	(((((((.((((((((((((.&))))))))....))))))))))).	6752	6776	1	-23.7	1	0.00292023	0.706	0.678705	0.651418	-6.25121	19	24	11	3UTR		0	1
hsa-miR-10525-3p	NM_033058	TRIM55	.((((((((.(((((((.(((&.))).)))).)))..)))))))).	2423	2463	1	-20.4	1	0.000354652	0.559	0.500338	0.306649	-5.03583	18	24	8	3UTR		0	0
hsa-miR-10525-3p	NM_033114	ZCRB1	..(((((.((((.((((((..&)))))).))))))))).	1614	1631	1	-15.5	1	0.0154387	0.588	6.27048	3.31711	-8.55977	15	17	9	3UTR		0	0
hsa-miR-10525-3p	NM_033130	SIGLEC10	(((((((..(((((.((((..&))))))))))))).))).	2307	2325	1	-17.4	1	4.41069e-06	0.5	0.1124	0.378658	-8.04305	16	18	13	3UTR		0	0
hsa-miR-10525-3p	NM_033141	MAP3K9	...((((((.(((((((((..&)))))))..)).)))))).	6639	6658	1	-20.1	1	0.000951936	0.529	-0.396829	-0.193044	-7.75705	15	19	7	3UTR		0	0
hsa-miR-10525-3p	NM_033171	B3GALT5	((((((((((..(((((((..&.))))))).....)))))))))).	8894	8934	1	-24.3	1	0.000573371	0.588	-0.318133	0.0114931	-10.1092	17	24	10	3UTR		0	0
hsa-miR-10525-3p	NM_033172	B3GALT5	((((((((((..(((((((..&.))))))).....)))))))))).	8734	8774	1	-24.3	1	0.000573371	0.588	-0.318133	0.0114931	-10.1092	17	24	10	3UTR		0	0
hsa-miR-10525-3p	NM_033184	KRTAP2-4	((((((((((((((((((((.&))))))))..))))))....)))))).	590	617	1	-24.4	1	0.0774493	0.632	1.78784	1.57223	-3.93757	20	27	8	3UTR		0	0
hsa-miR-10525-3p	NM_033224	PURB	..((((((((((((..(((((&)))))..)))))).)))))).	4648	4669	1	-19.7	1	0.0131115	0.588	1.17371	1.23805	-5.9255	17	21	6	3UTR		0	0
hsa-miR-10525-3p	NM_033238	PML	(((((.(((((((.(((....&))))))))))..))))).	3992	4010	1	-19.7	1	0.0159095	0.471	-0.32602	-0.031087	-6.69537	15	18	10	3UTR		0	0
hsa-miR-10525-3p	NM_033428	DMAC1	..((((((((..(((.((((.&)))).)))..)))))))).	1449	1468	1	-19.8	1	0.0074325	0.618	-0.176631	-0.150519	-11.3616	15	19	8	3UTR		0	0
hsa-miR-10525-3p	NM_033489	CDK11B	...(((((.((.((((((((.&)))))))).))))))).	2726	2743	1	-20.3	1	6.38366e-09	0.338	4.46489	4.38348	-10.9177	15	17	8	3UTR		0	0
hsa-miR-10525-3p	NM_033510	DISP2	.(((((.((((((((......&.)))))))).))))).	5038	5058	1	-18	1	0.135328	0.632	-0.441403	-0.0575572	-5.57006	13	16	8	3UTR		0	0
hsa-miR-10525-3p	NM_033512	TSPYL5	(((.((((((((((((((.((&.)).)))))))).)))))).))).	3910	3955	1	-23.9	1	0.00952853	0.632	0.0817304	0.0621432	-6.9696	19	24	8	3UTR		0	0
hsa-miR-10525-3p	NM_033655	CNTNAP3	...(((((((((((.......&))))))))))).	7119	7131	1	-18.3	1	0.011579	0.574	-0.128368	-0.283238	-7.48304	11	12	11	3UTR		0	0
hsa-miR-10525-3p	NM_052859	RFT1	(((((((((((.(((((....&.))))))))))))).))).	4749	4788	1	-20.1	1	0.0120159	0.441	3.99785	3.80631	-7.28438	16	19	13	3UTR		0	0
hsa-miR-10525-3p	NM_052909	PLEKHG4B	(((.((((((((((((.((..&)).)))))))))))).))).	6902	6922	1	-22.2	1	0.0161167	0.662	0.182	0.102513	-6.9696	17	20	12	3UTR		0	0
hsa-miR-10525-3p	NM_052971	LEAP2	(((((((.....((((((...&.)))))).....))))))).	709	734	1	-17.4	1	0.0118519	0.471	-0.286194	-0.170068	-14.7217	13	20	7	3UTR		0	0
hsa-miR-10525-3p	NM_053041	COMMD7	(((..((((((.(((((....&)))))))))))))).	1010	1025	1	-17.4	1	0.00197669	0.588	1.4948	2.83125	-14.4354	14	15	14	3UTR		0	0
hsa-miR-10525-3p	NM_053045	TMEM203	..(((..((.((.((((((..&)))))).))))..))).	974	991	1	-17.8	1	0.000133914	0.603	4.63635	4.33292	-10.9333	13	17	6	3UTR		0	0
hsa-miR-10525-3p	NM_053056	CCND1	..((((((((((((.((((((&)))))).))...)))))))))).	3461	3484	1	-22.4	1	3.40586e-05	0.529	0.555659	0.615432	-5.69245	18	23	10	3UTR		0	0
hsa-miR-10525-3p	NM_058175	COL6A2	...(((((((((.(.((((..&)))))))))))))).	3093	3108	1	-17.9	1	0.000523702	0.368	5.29135	2.86766	-8.53912	14	15	14	3UTR		0	0
hsa-miR-10525-3p	NM_058203	SPAG11B	.(((...(((.((((((((((&)))))))))).)))............))).	579	609	1	-20	1	0.00987132	0.471	-0.153466	-0.44896	-14.1818	16	30	10	3UTR		0	0
hsa-miR-10525-3p	NM_078471	MYO18A	..(((((((((((..(((...&.)))..))))))))))).	9285	9317	1	-20.1	1	0.0197957	0.5	1.5776	2.38705	-6.54929	14	18	11	3UTR		0	0
hsa-miR-10525-3p	NM_080424	SP110	(((.((..(((((((((((..&)))))))))))..))))).	2865	2884	1	-21.3	1	0.00232128	0.574	-0.113512	-0.0362536	-10.8269	16	19	11	3UTR		0	0
hsa-miR-10525-3p	NM_080491	GAB2	..(((((.(((((((((....&.))))))))).))))).	3374	3421	1	-20.7	1	3.78018e-05	0.426	-0.307578	-0.155741	-7.27064	14	17	9	3UTR		0	0
hsa-miR-10525-3p	NM_080677	DYNLL2	.(((......(((((((((((&)))))))))))......))).	5137	5158	1	-20.4	1	0.00921154	0.471	0.754888	0.090246	-15.9695	14	21	11	3UTR		0	0
hsa-miR-10525-3p	NM_080796	DIDO1	.......(((((((((((((.&))))))))))))).	2359	2373	1	-20.4	0	0.00332565	0.632	3.15127	2.7133	-17.1102	13	14	13	3UTR		0	0
hsa-miR-10525-3p	NM_080820	DTD1	..(((((.(((((((((((..&)))))))))))))))).	883	900	1	-23.1	1	2.70843e-07	0.279	0.0646907	-0.161255	-7.27064	16	17	16	3UTR		0	0
hsa-miR-10525-3p	NM_080823	SRMS	..((((((((((...((((..&)))))))))))))).	2319	2334	1	-17.8	1	0.000254359	0.309	1.38184	0.533825	-7.83842	14	15	14	3UTR		0	0
hsa-miR-10525-3p	NM_080836	STK35	.......((((((((((((..&)))))))))).)).	4734	4748	1	-19.5	0	0.000886065	0.471	-0.154178	0.172405	-17.1102	12	14	10	3UTR		0	0
hsa-miR-10525-3p	NM_100264	WAC	......(((((((((.(((((&)))))))))))))).	3091	3106	1	-17.4	0	0.00736819	0.647	2.08501	3.64782	-15.7996	14	15	14	3UTR		0	0
hsa-miR-10525-3p	NM_100486	WAC	......(((((((((.(((((&)))))))))))))).	3056	3071	1	-17.4	0	0.00736819	0.647	2.08501	3.64782	-15.7996	14	15	14	3UTR		0	0
hsa-miR-10525-3p	NM_130391	PTPRD	...((((.((((((((((...&)))))))))))))).	5948	5963	1	-17	1	0.000280904	0.618	4.51128	4.32482	-8.82818	14	15	14	3UTR		0	0
hsa-miR-10525-3p	NM_130392	PTPRD	...((((.((((((((((...&)))))))))))))).	5890	5905	1	-17	1	0.000280904	0.618	6.23331	4.53938	-8.82818	14	15	14	3UTR		0	0
hsa-miR-10525-3p	NM_130393	PTPRD	...((((.((((((((((...&)))))))))))))).	5860	5875	1	-17	1	0.000280904	0.618	5.65998	4.04334	-8.82818	14	15	14	3UTR		0	0
hsa-miR-10525-3p	NM_130759	GIMAP1	((((((((.(((((.(((...&.)))))))).)))))))).	2623	2671	1	-22.1	1	4.19245e-05	0.338	-0.185891	-0.0340096	-5.72941	16	19	8	3UTR		0	0
hsa-miR-10525-3p	NM_130831	OPA1	..(((((((((((((((....&)))))........)))))))))).	6071	6095	1	-19.4	1	0.0180766	0.618	-0.0646571	0.0745516	-4.957	15	24	10	3UTR		0	0
hsa-miR-10525-3p	NM_130833	OPA1	..(((((((((((((((....&)))))........)))))))))).	6182	6206	1	-19.4	1	0.0180766	0.618	-0.0646571	0.0745516	-4.957	15	24	10	3UTR		0	0
hsa-miR-10525-3p	NM_130834	OPA1	..(((((((((((((((....&)))))........)))))))))).	6233	6257	1	-19.4	1	0.0180766	0.618	-0.0646571	0.0745516	-4.957	15	24	10	3UTR		0	0
hsa-miR-10525-3p	NM_130835	OPA1	..(((((((((((((((....&)))))........)))))))))).	6236	6260	1	-19.4	1	0.0180766	0.618	-0.0646571	0.0745516	-4.957	15	24	10	3UTR		0	0
hsa-miR-10525-3p	NM_130836	OPA1	..(((((((((((((((....&)))))........)))))))))).	6290	6314	1	-19.4	1	0.0180766	0.618	-0.0646571	0.0745516	-4.957	15	24	10	3UTR		0	0
hsa-miR-10525-3p	NM_130837	OPA1	..(((((((((((((((....&)))))........)))))))))).	6344	6368	1	-19.4	1	0.0180766	0.618	-0.0646571	0.0745516	-4.957	15	24	10	3UTR		0	0
hsa-miR-10525-3p	NM_133370	YTHDC1	((((((((((((((..((...&.))..)))))..))))))))).	5466	5500	1	-18.9	1	0.00203878	0.5	2.27963	2.77025	-4.90607	16	22	9	3UTR		0	0
hsa-miR-10525-3p	NM_133371	MYOZ3	(((((((...(((((.((((.&.)))))))))...))))))).	2576	2612	1	-21.4	1	9.39599e-05	0.5	0.0317559	-0.13613	-8.78315	16	21	9	3UTR		0	0
hsa-miR-10525-3p	NM_133374	ZNF618	((.(((...(((((((((((.&)))))))))))...))))).	3104	3124	1	-20.3	1	0.00104152	0.529	2.03156	2.11344	-10.4088	16	20	11	3UTR		0	0
hsa-miR-10525-3p	NM_133445	GRIN3A	......(((.(((((((((..&))))))))).))).	6221	6235	1	-18.1	0	0.0028959	0.485	2.9811	2.98141	-16.8091	12	14	9	3UTR		0	0
hsa-miR-10525-3p	NM_133646	MAP3K20	(((((((....(((((((.(.&).)))))))))))))).	3931	3948	1	-18.8	1	4.30631e-05	0.412	-0.0606129	-0.116384	-11.3749	15	17	14	3UTR		0	0
hsa-miR-10525-3p	NM_133647	SLC12A6	((.(((.(((((((.(((...&))))))))))))))).	4816	4832	1	-18	1	0.00364105	0.559	3.08007	4.85828	-7.77425	15	16	15	3UTR		0	0
hsa-miR-10525-3p	NM_138381	OXNAD1	.(((...(((((((((((...&.))))))))))).))).	3783	3821	1	-19.3	1	0.00121211	0.544	-0.285985	-0.128071	-11.357	14	17	11	3UTR		0	0
hsa-miR-10525-3p	NM_138384	MTG1	..((((((..((((((((.((&)).)))))))))))))).	1423	1441	1	-21.2	1	5.72429e-05	0.426	-0.370636	-0.375354	-7.2559	16	18	14	3UTR		0	0
hsa-miR-10525-3p	NM_138400	NOM1	((((((((((((((..(((..&.)))..)))).)))))))))).	4335	4368	1	-21.3	1	0.0331517	0.441	-0.145565	-0.0269842	-4.90607	17	22	10	3UTR		0	0
hsa-miR-10525-3p	NM_138412	RDH13	.(((((((.(((((((.....&.)))))))))))))).	1651	1674	1	-18	1	0.029938	0.471	3.36065	2.01727	-4.84971	14	16	14	3UTR		0	0
hsa-miR-10525-3p	NM_138446	MALSU1	....((((((((((.(((((.&))))))))))))))).	1444	1460	1	-17.7	1	0.00628738	0.603	3.71724	3.24669	-10.282	15	16	15	3UTR		0	0
hsa-miR-10525-3p	NM_138633	AKAP7	..((((.((((((((((((..&.)))))))....))))))))).	1758	1782	1	-19.5	1	0.0023307	0.676	0.151929	0.816779	-6.50069	16	22	9	3UTR		0	0
hsa-miR-10525-3p	NM_138727	ST7L	.......(((((((((((...&.))))))))))).	2576	2605	1	-20.1	0	0.00147665	0.485	-0.202034	3.00316	-17.1102	11	13	11	3UTR		0	0
hsa-miR-10525-3p	NM_138771	CCDC126	((((((((((((((.((((((&))))))...)))))))))...........))))).	1709	1744	1	-19.3	1	0.00111834	0.676	0.84498	0.583633	-4.67302	20	35	9	3UTR		0	0
hsa-miR-10525-3p	NM_138959	VANGL1	.(((((((.(((((((((((.&))))..)))))))...))))))).	6921	6945	1	-19.1	1	0.0320673	0.618	-0.217636	-0.259251	-4.84971	18	24	7	3UTR		0	0
hsa-miR-10525-3p	NM_139015	SPPL3	.((((((((((..((.(((..&.))).))..)))))))))).	1649	1685	1	-20.1	1	0.00509013	0.529	1.16006	1.20577	-8.66231	15	20	10	3UTR		0	0
hsa-miR-10525-3p	NM_139318	KCNH5	..(((((((((((((((((((&.)))).))))))..))))))))).	5678	5713	1	-20.7	1	0.00749107	0.647	0.178367	0.132344	-4.957	19	24	9	3UTR		0	0
hsa-miR-10525-3p	NM_139320	CHRFAM7A	(((((((...(((..((((..&))))..)))...))))))).	1922	1942	1	-19.5	1	0.00274537	0.441	0	0	-10.1424	14	20	7	3UTR		0	0
hsa-miR-10525-3p	NM_144607	CYB5D1	......((.(((((((((((.&))))))))))).)).	1497	1512	1	-20.3	0	0.00401047	0.574	-0.396441	0.0574484	-16.6229	13	15	11	3UTR		0	0
hsa-miR-10525-3p	NM_145019	FAM124A	......((.((((((((((..&)))))))))).)).	3778	3792	1	-19.2	0	0.000351735	0.529	0.146007	-0.0786899	-16.6229	12	14	10	3UTR		0	0
hsa-miR-10525-3p	NM_145026	SPATS1	...(((((((((((((.....&.))))))))))))).	3987	4021	1	-20.1	1	0.00714344	0.574	0.290475	-0.127097	-6.51454	13	15	13	3UTR		0	0
hsa-miR-10525-3p	NM_145068	TRPV3	(((((..((((.((((((((.&))))))))..))))....))))).	5150	5174	1	-20.1	1	0.000167712	0.544	2.40209	3.10276	-10.729	17	24	8	3UTR		0	0
hsa-miR-10525-3p	NM_145207	SPATA5	((((.(((.((((((((((..&))))))))))....))))))).	4601	4623	1	-22.6	1	0.000325802	0.588	0.087918	-0.0189445	-9.113	17	22	10	3UTR		0	0
hsa-miR-10525-3p	NM_145273	CD300LG	...((.(((((((((((((((&))))))))))))))).)).	1839	1858	1	-24.7	1	0.000807012	0.426	-0.11346	0.0129257	-8.4155	17	19	15	3UTR		0	0
hsa-miR-10525-3p	NM_145866	FZD3	.(((((((((((((..(((..&)))..))))).)))))))).	6501	6521	1	-18.2	1	0.00329902	0.544	0.170732	0.117495	-4.76182	16	20	8	3UTR		0	0
hsa-miR-10525-3p	NM_152230	IPMK	...((((((((((((((....&)))))))..))))))).	3186	3203	1	-17.5	1	0.0483339	0.779	-0.167237	-0.169714	-6.51454	14	17	7	3UTR		0	0
hsa-miR-10525-3p	NM_152352	FAM210A	......((.((((((((((..&)))))))))).)).	3863	3877	1	-19.6	0	0.00402801	0.456	0.853598	1.09934	-16.6229	12	14	10	3UTR		0	0
hsa-miR-10525-3p	NM_152380	TBX15	((((((....((((.((((((&)))))))))))))))).	2723	2740	1	-18.6	1	0.00117097	0.426	4.46898	4.76738	-10.8292	16	17	16	3UTR		0	0
hsa-miR-10525-3p	NM_152440	C12orf66	...((((((...(((((((..&))))))))))))).	2496	2510	1	-17.4	1	0.000699194	0.529	1.63141	0.509962	-13.9286	13	14	13	3UTR		0	0
hsa-miR-10525-3p	NM_152455	ZSCAN29	.(((((((((((((((.((..&.)).)))))))).))))))).	4467	4510	1	-22.1	1	0.000145457	0.588	1.42671	1.12021	-3.79332	17	21	8	3UTR		0	0
hsa-miR-10525-3p	NM_152542	PPM1K	((((((((((.((((((....&.))))))))))))).))).	4069	4094	1	-20.3	1	3.94941e-05	0.515	0.178588	-0.0747771	-6.76235	16	19	13	3UTR		0	0
hsa-miR-10525-3p	NM_152542	PPM1K	(((((((.(..((((((....&)))))).).))))))).	5972	5989	1	-18.5	1	0.0054511	0.588	1.00939	2.2829	-10.3185	14	17	7	3UTR		0	0
hsa-miR-10525-3p	NM_152630	TENT5D	..(((((((((.((.......&.))))))))))).	1582	1603	1	-15.3	1	0.136288	0.735	0.536066	0.379342	-9.2723	11	13	11	3UTR		0	0
hsa-miR-10525-3p	NM_152703	SAMD9L	.((((((((((((.(((....&))))))))))))...))).	6254	6273	1	-17.7	1	0.0373706	0.662	0.0787831	0.228341	-4.65016	15	19	12	3UTR		0	0
hsa-miR-10525-3p	NM_152724	RSU1	(((((...((((((.(((...&))))))))).....))))).	2139	2159	1	-15	1	0.529636	0.603	1.04987	1.02422	-10.4313	14	20	9	3UTR		0	0
hsa-miR-10525-3p	NM_152791	ZNF555	.((((((((((((((((....&.)))))))))).)))))).	6058	6106	1	-25.1	1	0.000105022	0.397	-0.144324	-0.0228506	-3.79332	16	19	10	3UTR		0	0
hsa-miR-10525-3p	NM_152834	TMEM18	.(((((((((((((((((...&.)))))))..)))))))))).	3629	3670	1	-20.6	1	0.00792577	0.559	-0.33505	-0.704758	-3.79332	17	21	10	3UTR		0	0
hsa-miR-10525-3p	NM_152871	FAS	.((((((((((.((.......&.)))))))))))).	2887	2935	1	-18.3	1	0.00482139	0.618	-0.540417	-0.0816196	-8.10863	12	14	12	3UTR		0	0
hsa-miR-10525-3p	NM_152872	FAS	.((((((((((.((.......&.)))))))))))).	2925	2973	1	-18.3	1	0.00482139	0.618	-0.540417	-0.0816196	-8.10863	12	14	12	3UTR		0	0
hsa-miR-10525-3p	NM_153050	MTMR3	(.((((((((.(((.((((..&))))))).)))))))).).	5257	5276	1	-19.9	1	0.00922659	0.5	0.207488	0.493527	-8.66147	16	19	8	3UTR		0	0
hsa-miR-10525-3p	NM_153051	MTMR3	(.((((((((.(((.((((..&))))))).)))))))).).	5230	5249	1	-19.9	1	0.00922659	0.5	0.162969	0.615956	-8.66147	16	19	8	3UTR		0	0
hsa-miR-10525-3p	NM_153256	PROSER2	..((((((((((.(((((...&)))))..)))))))))).	2009	2027	1	-21.1	1	5.3347e-05	0.632	-0.0100298	0.178248	-6.24613	15	18	10	3UTR		0	0
hsa-miR-10525-3p	NM_153271	SNX33	.(((((((((.(.(.((....&))).).))))))))).	4258	4274	1	-17.9	1	1.10512e-09	0.382	0.429722	0.734325	-8.64268	13	16	9	3UTR		0	0
hsa-miR-10525-3p	NM_153332	ERI1	.((((.(((((((((((((..&.))))))))).)))).)))).	4028	4065	1	-22.8	1	0.00010491	0.529	0	0	-5.69428	17	21	9	3UTR		0	0
hsa-miR-10525-3p	NM_153446	B4GALNT2	((.(((((((((((((((((.&)))).))))))))))))).)).	8822	8844	1	-24.7	1	0.000823191	0.544	0.0149917	0.0481212	-5.49511	19	22	13	3UTR		0	0
hsa-miR-10525-3p	NM_153611	CYB561A3	(((((..(((((((((((...&.)))))))))))..))))).	1498	1534	1	-19.5	1	0.0185358	0.441	-0.0408822	-0.164393	-7.38222	16	20	11	3UTR		0	0
hsa-miR-10525-3p	NM_153616	SEMA6D	.(((((((((.((((((....&))))))))))))..))).	5010	5028	1	-17.5	1	0.00184337	0.632	2.50284	2.38995	-6.6181	15	18	12	3UTR		0	0
hsa-miR-10525-3p	NM_153617	SEMA6D	.(((((((((.((((((....&))))))))))))..))).	5067	5085	1	-17.5	1	0.00184337	0.632	2.50284	2.38995	-6.6181	15	18	12	3UTR		0	0
hsa-miR-10525-3p	NM_153618	SEMA6D	.(((((((((.((((((....&))))))))))))..))).	5235	5253	1	-17.5	1	0.00184337	0.632	2.50284	2.38995	-6.6181	15	18	12	3UTR		0	0
hsa-miR-10525-3p	NM_153619	SEMA6D	.(((((((((.((((((....&))))))))))))..))).	4648	4666	1	-17.5	1	0.00184337	0.632	2.50284	2.38995	-6.6181	15	18	12	3UTR		0	0
hsa-miR-10525-3p	NM_153712	TTL	.(((((((((.((((.(((((&))))).))))))))))))).	3842	3862	1	-20.2	1	0.019728	0.603	-0.242693	0.234909	-6.85115	18	20	13	3UTR		0	0
hsa-miR-10525-3p	NM_153714	C10orf67	(((((((((.((((((((...&.)))))))))))))).))).	1397	1444	1	-20.5	1	2.38952e-05	0.5	0.0836345	0.0977836	-5.18008	17	20	14	3UTR		0	0
hsa-miR-10525-3p	NM_153810	CACUL1	..((((((((((((.((((..&)))).))))....)))))))).	4927	4949	1	-17.9	1	0.0336567	0.676	0.0692482	0.120189	-5.69245	16	22	8	3UTR		0	0
hsa-miR-10525-3p	NM_170692	RASAL2	((((((((.(((((.(((...&)))))))).)))))))).	6321	6339	1	-20.1	1	0.000838284	0.588	-0.0848839	-0.155557	-5.72941	16	18	8	3UTR		0	0
hsa-miR-10525-3p	NM_170707	LMNA	...((((((((((((......&)))))))))))).	2276	2289	1	-18.8	1	1.27683e-05	0.412	-0.0503531	0.937894	-6.74759	12	13	12	3UTR		0	0
hsa-miR-10525-3p	NM_170708	LMNA	...((((((((((((......&)))))))))))).	2186	2199	1	-18.8	1	1.27683e-05	0.412	-0.0503531	0.937894	-6.74759	12	13	12	3UTR		0	0
hsa-miR-10525-3p	NM_170744	UNC5B	.(((((.((.((((.((((..&))))))))))))))).	6549	6565	1	-19.2	1	6.89544e-05	0.382	0.104345	0.0293746	-7.31497	15	16	15	3UTR		0	0
hsa-miR-10525-3p	NM_172069	PLEKHH2	(((((((((((.(((((....&.))))))))))))).))).	5635	5683	1	-22.7	1	0.00323345	0.426	-0.184327	-0.0619564	-7.28438	16	19	13	3UTR		0	0
hsa-miR-10525-3p	NM_172177	MRPL42	((((((((((.((((((....&))))))))))))).))).	12599	12617	1	-19.9	1	0.000859757	0.471	0.111833	0.105468	-6.76235	16	18	13	3UTR		0	0
hsa-miR-10525-3p	NM_172206	CAMKK1	(((.((((((((((((((...&)))))))))))..))).))).	3009	3030	1	-18	1	6.2077e-05	0.412	3.86842	3.91655	-6.9696	17	21	11	3UTR		0	0
hsa-miR-10525-3p	NM_172236	POFUT1	.....(((((((((((((((.&)))))))).............))))))).	675	704	1	-18.5	1	0.017962	0.603	1.33808	0.974297	-13.6656	15	29	8	3UTR		0	0
hsa-miR-10525-3p	NM_172362	KCNH1	...(((((.(((.((((((..&))))))))).))))).	4701	4717	1	-17.9	1	0.0021872	0.5	0.746379	0.925377	-8.86006	14	16	9	3UTR		0	0
hsa-miR-10525-3p	NM_172375	KCNH5	..(((((((((((((((((((&.)))).))))))..))))))))).	5481	5516	1	-20.7	1	0.00749107	0.647	0.81685	1.22981	-4.957	19	24	9	3UTR		0	0
hsa-miR-10525-3p	NM_173073	SLC35C2	..(((((((((.((.((((..&)))))).))))))))).	1419	1436	1	-22.2	1	8.36477e-06	0.368	-0.404565	0.039472	-9.03925	15	17	9	3UTR		0	0
hsa-miR-10525-3p	NM_173156	SMG7	((((((.((.(((((((((..&.))))))))).)))))))).	4035	4067	1	-23.8	1	0.0054513	0.515	2.73484	2.50712	-6.72377	17	20	9	3UTR		0	0
hsa-miR-10525-3p	NM_173206	PIAS2	(((.(((.((.((((((((((&)))))))))).)).))).))).	1975	1997	1	-21	1	1.01689e-05	0.632	0.476535	0.268125	-12.108	18	22	10	3UTR		0	0
hsa-miR-10525-3p	NM_173475	DCUN1D3	.(((.(((((((((((((((.&))))))))...)))))))))).	5506	5528	1	-24.9	1	2.19354e-05	0.5	5.44811	6.16675	-7.91236	18	22	10	3UTR		0	0
hsa-miR-10525-3p	NM_173487	C4orf33	(((((((((.((((((((((.&))))))))))..))))...........................))))).	2780	2829	1	-21.5	1	0.000641697	0.603	0.568724	0.532287	-5.18008	19	49	10	3UTR		0	0
hsa-miR-10525-3p	NM_173491	LSM11	(((((.(((((((((((((..&.)).)))))))))))))))).	4947	4988	1	-23.9	1	0.0251079	0.544	0.0542916	0.195566	-5.83853	18	21	16	3UTR		0	0
hsa-miR-10525-3p	NM_173595	ANKRD52	(((((((((((((((((.(((&)))..))))))........))))))))))).	8607	8638	1	-19.8	1	0.00831647	0.603	0.704917	0.747479	-3.93757	20	31	11	3UTR		0	0
hsa-miR-10525-3p	NM_173664	ARL10	((((((((((.((((((....&))))))))))))).))).	6737	6755	1	-20	1	0.00507718	0.456	-0.128674	0.0958782	-6.76235	16	18	13	3UTR		0	0
hsa-miR-10525-3p	NM_173683	XKR6	((((((((.((((((......&)))))))))))))).	3360	3375	1	-17.8	1	0.00676449	0.706	1.9311	3.38952	-5.22701	14	15	14	3UTR		0	1
hsa-miR-10525-3p	NM_173802	ETFBKMT	..((((((((((((((.....&))))))..)))))))).	5640	5657	1	-18	1	0.000482253	0.662	-0.135953	0.219175	-4.957	14	17	8	3UTR		0	0
hsa-miR-10525-3p	NM_173822	FAM126B	...(((((((((.(.(((((.&))))).).))))))))).	8075	8093	1	-17.9	1	0.00261939	0.632	5.4107	3.74539	-8.53912	15	18	9	3UTR		0	0
hsa-miR-10525-3p	NM_173854	SLC41A1	.(((((((((((.(((((...&))))).)))))))..)))).	4102	4122	1	-20.3	1	0.000696964	0.588	0.521773	1.71245	-5.08246	16	20	7	3UTR		0	0
hsa-miR-10525-3p	NM_175056	ZPLD1	.(((((((.((((((......&))))))))))))).	1785	1799	1	-17.5	1	0.0101675	0.676	0.411202	0.376866	-5.08276	13	14	13	3UTR		0	0
hsa-miR-10525-3p	NM_175636	RUNX1T1	...(((.((((((((((((..&)))))))))))).))).	5320	5337	1	-21.2	1	0.000787297	0.721	4.132	4.52896	-8.05823	15	17	12	3UTR		0	0
hsa-miR-10525-3p	NM_175726	IL5RA	(((((((((..(((((.....&.)))))..))))))))).	4368	4415	1	-19.7	1	0.0111803	0.515	2.93473	1.09693	-8.00486	14	18	9	3UTR		0	1
hsa-miR-10525-3p	NM_175888	ZNF620	.(((.(((.((((((((((((&)))))))))...))).)))..))).	2574	2599	1	-20.9	1	9.86621e-05	0.647	0.356288	0.212631	-8.96875	18	25	9	3UTR		0	0
hsa-miR-10525-3p	NM_175914	HNF4A	((((((((.((..((((....&))))..)))))))))).	1421	1438	1	-18.7	1	1.4095e-06	0.397	0.479678	0.60381	-9.6299	14	17	10	3UTR		0	0
hsa-miR-10525-3p	NM_176071	P2RY2	.((((..(((.((((((((((&)))))))))))))..)))).	2292	2312	1	-22.5	1	0.000420895	0.485	0.0578322	0.158128	-10.0627	17	20	13	3UTR		0	0
hsa-miR-10525-3p	NM_176072	P2RY2	.((((..(((.((((((((((&)))))))))))))..)))).	2483	2503	1	-22.5	1	0.000420895	0.485	0.0578322	0.158128	-10.0627	17	20	13	3UTR		0	0
hsa-miR-10525-3p	NM_178427	ARNT	...(((.(((((((.((((..&)))))))))))))).	4600	4615	1	-17.9	1	0.000302319	0.485	2.38607	1.80107	-8.79368	14	15	14	3UTR		0	0
hsa-miR-10525-3p	NM_178548	TFAP2E	.((((((((((.(((......&))).)))))))))).	2173	2188	1	-19.1	1	0.000106356	0.574	0.62667	1.97107	-7.37318	13	15	10	3UTR		0	0
hsa-miR-10525-3p	NM_178812	MTDH	(((....((((((((((((((&)))))))))..)))))....))).	3603	3627	1	-19.6	0	0.00103609	0.676	2.26174	2.91811	-14.5333	17	24	9	3UTR		0	0
hsa-miR-10525-3p	NM_178826	ANO4	((.((((((((((((......&)))))))))))).)).	3397	3413	1	-17.3	1	0.00243086	0.603	2.25446	2.07321	-5.72816	14	16	12	3UTR		0	1
hsa-miR-10525-3p	NM_178849	HNF4A	((((((((.((..((((....&))))..)))))))))).	1587	1604	1	-18.7	1	1.4095e-06	0.397	0.479678	0.60381	-9.6299	14	17	10	3UTR		0	0
hsa-miR-10525-3p	NM_181352	ATF7IP	.(((((((.((((((((((..&.))))))))))))))))).	5062	5093	1	-26.5	1	0.0293184	0.5	0.0617227	0.0517	-4.84971	17	19	17	3UTR		0	0
hsa-miR-10525-3p	NM_181489	ZNF445	(((.(((.(((((((((((..&)))))))...)))).))).))).	16147	16170	1	-19.9	1	0.0221281	0.515	1.85024	1.24453	-9.28323	17	23	7	3UTR		0	0
hsa-miR-10525-3p	NM_181780	BTLA	.((((((.((((((((((((.&))))))))............)))).)))))).	2153	2185	1	-18.9	1	0.0500978	0.647	1.29647	-0.119945	-6.10696	18	32	8	3UTR		0	0
hsa-miR-10525-3p	NM_181828	NF2	.((((((.(((((((((((..&)))))....)))))).)))))).	4473	4496	1	-20.3	1	0.0082251	0.559	0.457736	0.514382	-6.10696	17	23	6	3UTR		0	0
hsa-miR-10525-3p	NM_181829	NF2	.((((((.(((((((((((..&)))))....)))))).)))))).	4476	4499	1	-20.3	1	0.0082251	0.559	0.457736	0.514382	-6.10696	17	23	6	3UTR		0	0
hsa-miR-10525-3p	NM_181830	NF2	.((((((.(((((((((((..&)))))....)))))).)))))).	4350	4373	1	-20.3	1	0.0082251	0.559	0.457736	0.514382	-6.10696	17	23	6	3UTR		0	0
hsa-miR-10525-3p	NM_181832	NF2	.((((((.(((((((((((..&)))))....)))))).)))))).	4614	4637	1	-20.3	1	0.0082251	0.559	0.457736	0.514382	-6.10696	17	23	6	3UTR		0	0
hsa-miR-10525-3p	NM_181833	NF2	...(((((((.((..((((((&))))))..)).))))))).	4570	4589	1	-20.6	1	0.000371152	0.485	-0.287118	-0.0180861	-10.9316	15	19	7	3UTR		0	0
hsa-miR-10525-3p	NM_181845	ZNF283	.(((((((((((((.......&.))).)))))))))).	5576	5609	1	-18.9	1	0.000473952	0.588	0.0903079	0.45809	-4.76182	13	16	10	3UTR		0	0
hsa-miR-10525-3p	NM_181887	UBE2D3	.(((.......((((((((..&))))))))......))).	2064	2082	1	-17.6	1	0.00173467	0.618	3.97624	3.34515	-18.7943	11	18	8	3UTR		0	0
hsa-miR-10525-3p	NM_181897	PPP2R3A	.(((((((((((((((((.((&.)).).)))))))))).)))))).	3950	3999	1	-24.5	1	0.000268126	0.5	-0.00886439	0.0195342	-3.79332	19	24	10	3UTR		0	0
hsa-miR-10525-3p	NM_182521	ZSWIM2	.(((((((.(((((.......&)))))))))))).	2009	2022	1	-18.2	1	0.212773	0.75	1.56146	1.14886	-5.81821	12	13	12	3UTR		0	0
hsa-miR-10525-3p	NM_182569	GDPD1	((((((....(((((((((..&)))))))))..)))))).	2466	2484	1	-17.5	1	0.006174	0.676	0.33226	0.644733	-10.0938	15	18	9	3UTR		0	0
hsa-miR-10525-3p	NM_182614	TMEM255B	((((((((((.(((((((...&))))))))))).)))))).	5337	5356	1	-21.4	1	0.000576683	0.441	0.112219	-0.317391	-6.76235	17	19	11	3UTR		0	0
hsa-miR-10525-3p	NM_182616	ARPIN	(.(((((..((((((((....&)))))))).))))).).	3065	3082	1	-19.7	1	0.00221799	0.485	0.149914	0.0946975	-8.47127	14	17	8	3UTR		0	0
hsa-miR-10525-3p	NM_182703	ANKDD1A	...((.(((((((((((((..&))))))))...))))).)).	1607	1627	1	-19.6	1	0.00199135	0.574	-0.405649	-0.0598415	-8.4155	15	20	8	3UTR		0	0
hsa-miR-10525-3p	NM_182746	MCM4	..(((((((.((((((((((.&)))))))).)).))))))).	3222	3242	1	-21.3	1	0.0339181	0.603	-0.0397859	-0.135781	-6.19951	17	20	8	3UTR		0	0
hsa-miR-10525-3p	NM_182811	PLCG1	((.((((((.(.((((((...&))))))))))))))).	5048	5064	1	-17.8	1	8.47883e-05	0.412	0.618588	0.553879	-10.0844	15	16	15	3UTR		0	0
hsa-miR-10525-3p	NM_182898	CREB5	((((((((((.((((((....&.))))))))))))).))).	3300	3325	1	-19.7	1	7.94793e-05	0.471	-0.301686	0.080031	-6.76235	16	19	13	3UTR		0	0
hsa-miR-10525-3p	NM_182898	CREB5	.(((...((((((((((....&)))))))))).....))).	7026	7045	1	-19.5	1	0.00113282	0.5	0.372337	1.79741	-11.357	13	19	10	3UTR		0	0
hsa-miR-10525-3p	NM_182899	CREB5	((((((((((.((((((....&.))))))))))))).))).	2949	2974	1	-19.7	1	7.94793e-05	0.471	-0.301686	0.080031	-6.76235	16	19	13	3UTR		0	0
hsa-miR-10525-3p	NM_182899	CREB5	.(((...((((((((((....&)))))))))).....))).	6675	6694	1	-19.5	1	0.00113282	0.5	0.372337	1.79741	-11.357	13	19	10	3UTR		0	0
hsa-miR-10525-3p	NM_183043	RNF6	...((((.(((((((((((..&))))))))))))))).	3205	3221	1	-17.5	1	0.000487415	0.779	0.773637	0.689233	-8.82818	15	16	15	3UTR		0	0
hsa-miR-10525-3p	NM_183044	RNF6	...((((.(((((((((((..&))))))))))))))).	3001	3017	1	-17.5	1	0.000487415	0.779	3.88965	3.53685	-8.82818	15	16	15	3UTR		0	0
hsa-miR-10525-3p	NM_184085	TRIM55	.((((((((.(((((((.(((&.))).)))).)))..)))))))).	2335	2375	1	-20.4	1	0.000354652	0.559	0.500338	0.306649	-5.03583	18	24	8	3UTR		0	0
hsa-miR-10525-3p	NM_184086	TRIM55	.((((((((.(((((((.(((&.))).)))).)))..)))))))).	2047	2087	1	-20.4	1	0.000354652	0.559	0.500338	0.306649	-5.03583	18	24	8	3UTR		0	0
hsa-miR-10525-3p	NM_184087	TRIM55	.((((((((.(((((((.(((&.))).)))).)))..)))))))).	1414	1454	1	-20.4	1	0.000354652	0.559	0.500338	0.306649	-5.03583	18	24	8	3UTR		0	0
hsa-miR-10525-3p	NM_194291	TMEM65	((((((((.(((((.((((((&)))))).))))).....)))))))).	3641	3667	1	-19.4	1	0.0708257	0.632	0.678014	0.812033	-5.72941	19	26	8	3UTR		0	0
hsa-miR-10525-3p	NM_194434	VAPA	.((((..((((((((.(((((&))))).)))))))).)))).	1218	1238	1	-21.4	1	0.109776	0.676	3.48952	3.43435	-7.47102	17	20	8	3UTR		0	0
hsa-miR-10525-3p	NM_197977	ZNF189	..(((.(.(((((((((((..&))))))))))).).))).	3055	3073	1	-21.6	1	0.000298602	0.603	0.64997	0.595178	-9.17159	15	18	11	3UTR		0	0
hsa-miR-10525-3p	NM_198081	SCML4	...(((((((((((.......&.))))))))))).	3207	3226	1	-18	1	0.00126159	0.515	4.39294	4.64901	-7.48304	11	13	11	3UTR		0	0
hsa-miR-10525-3p	NM_198087	ZNF200	(.(((((((((.(((((((..&)))))))...))))))))).).	2377	2399	1	-20.5	1	0.00142271	0.574	1.442	0.61895	-8.44805	17	22	9	3UTR		0	0
hsa-miR-10525-3p	NM_198088	ZNF200	(.(((((((((.(((((((..&)))))))...))))))))).).	2505	2527	1	-20.5	1	0.00142271	0.574	0.912557	0.755284	-8.44805	17	22	9	3UTR		0	0
hsa-miR-10525-3p	NM_198156	VHL	(((((((((((((((((((..&))).)..))))))))))........))))).	1068	1099	1	-19.4	1	0.0211163	0.456	0.560417	0.188157	-3.93757	19	31	10	3UTR		0	0
hsa-miR-10525-3p	NM_198158	MITF	(((((((((((.((.......&)).))))))))))).	2642	2657	1	-16.9	1	9.24459e-05	0.662	1.05624	1.90843	-8.25288	13	15	11	3UTR		0	0
hsa-miR-10525-3p	NM_198159	MITF	(((((((((((.((.......&)).))))))))))).	2966	2981	1	-16.9	1	9.24459e-05	0.662	1.05624	1.90843	-8.25288	13	15	11	3UTR		0	0
hsa-miR-10525-3p	NM_198177	MITF	(((((((((((.((.......&)).))))))))))).	2851	2866	1	-16.9	1	9.24459e-05	0.662	1.05624	1.90843	-8.25288	13	15	11	3UTR		0	0
hsa-miR-10525-3p	NM_198178	MITF	(((((((((((.((.......&)).))))))))))).	2474	2489	1	-16.9	1	9.24459e-05	0.662	1.05624	1.90843	-8.25288	13	15	11	3UTR		0	0
hsa-miR-10525-3p	NM_198207	CERS1	((.((((((((((((((((((&)))))))))))).....)))))).)).	1776	1803	1	-23	1	0.000214437	0.426	1.88216	2.52899	-5.49511	20	27	12	3UTR		0	0
hsa-miR-10525-3p	NM_198279	BCLAF3	....((((((((((((((((.&))))).........))))))))))).	2763	2789	1	-18.9	1	0.015637	0.691	0	0	-9.54656	16	26	11	3UTR		0	0
hsa-miR-10525-3p	NM_198318	PRMT1	....((((((((((.(((...&.))))))))))))).	1191	1211	1	-19.1	1	9.5269e-05	0.5	2.05475	1.70989	-10.282	13	15	13	3UTR		0	0
hsa-miR-10525-3p	NM_198478	NKPD1	(((((.((.((((((((((..&))))))))))))))))).	3724	3742	1	-22.1	1	0.000254851	0.412	1.29359	1.35092	-6.89492	17	18	17	3UTR		0	0
hsa-miR-10525-3p	NM_198510	ITIH6	.((((((((.(((((((((((&))))))......)))))..)))))))).	4169	4197	1	-21.9	1	0.00724397	0.5	2.15207	1.68434	-5.03583	19	28	8	3UTR		0	0
hsa-miR-10525-3p	NM_198569	ADGRG6	.(((((((((..((((.....&))))....))))))))).	6430	6448	1	-16.7	1	0.00472446	0.632	0.296794	0.0596274	-9.9649	13	18	9	3UTR		0	0
hsa-miR-10525-3p	NM_198896	RAB6A	..((((((.((((((((((((&)))))))...))))))))))).	2252	2274	1	-20.6	1	0.140851	0.588	2.83114	3.00644	-6.01339	18	22	11	3UTR		0	0
hsa-miR-10525-3p	NM_198902	TSPAN3	(((((((((.((((((((...&.)))))).))))))))))).	2533	2570	1	-21.8	1	0.000333949	0.515	0.256703	-0.0466102	-5.18008	17	20	11	3UTR		0	0
hsa-miR-10525-3p	NM_199229	RPE	.((.((((.(((((((((.((&)).))))))))).)))).)).	1165	1186	1	-20.1	1	0.000842143	0.662	0.240393	0.371333	-7.88174	17	21	9	3UTR		0	0
hsa-miR-10525-3p	NM_199347	NEK10	.((((((((((.(((......&))))))))))))).	2442	2456	1	-16.3	1	0.00545484	0.485	0.934812	0.234219	-7.37318	13	14	13	3UTR		0	0
hsa-miR-10525-3p	NM_199437	PRDM10	(((((((((((((((((((((&))))))).....)))))).))).....))))).	5764	5797	1	-20.7	1	0.0279332	0.647	3.40849	3.91694	-3.93757	21	33	7	3UTR		0	0
hsa-miR-10525-3p	NM_199478	PLP1	...((((..((((((((.((.&)).))))))))..)))).	1325	1343	1	-15.2	1	0.0071946	0.632	0.67269	0.891342	-9.88456	14	18	8	3UTR		0	0
hsa-miR-10525-3p	NM_201568	SMG7	((((((.((.(((((((((..&.))))))))).)))))))).	3897	3929	1	-23.8	1	0.0054513	0.515	2.73484	2.50712	-6.72377	17	20	9	3UTR		0	0
hsa-miR-10525-3p	NM_203282	ZNF254	(((((((((.(((..((((..&))))..)))..))))))))).	3878	3899	1	-18.4	1	0.00434018	0.779	-0.429571	-1.24049	-6.77237	16	21	9	3UTR		0	0
hsa-miR-10525-3p	NM_203318	MYO18A	..(((((((((((..(((...&.)))..))))))))))).	9240	9272	1	-20.1	1	0.0197957	0.5	1.5776	2.38705	-6.54929	14	18	11	3UTR		0	0
hsa-miR-10525-3p	NM_203391	GK	(((.((((((((((.......&)))))))))).))).	2484	2499	1	-16.1	1	0.131933	0.618	0.844282	0.714424	-7.9381	13	15	10	3UTR		0	0
hsa-miR-10525-3p	NM_203395	IYD	.(((((((.((((((((((..&)))))))))).))............))))).	5719	5750	1	-19.6	1	0.0344732	0.529	-0.028	-0.12605	-4.84971	17	31	10	3UTR		0	0
hsa-miR-10525-3p	NM_203464	AK4	.((((((((((((((((((((&.))))....)))))))).)))))))).	4122	4156	1	-22.1	1	0.00143807	0.559	-0.151648	-0.0145111	-3.79332	20	27	8	3UTR		0	0
hsa-miR-10525-3p	NM_206853	QKI	((((....((((((((((...&)))))))))))))).	2760	2775	1	-19.6	1	0.000249264	0.618	0.773347	1.63867	-13.8149	14	15	14	3UTR		0	0
hsa-miR-10525-3p	NM_206854	QKI	((((....((((((((((...&)))))))))))))).	4039	4054	1	-19.6	1	0.000249264	0.618	0.773347	1.63867	-13.8149	14	15	14	3UTR		0	0
hsa-miR-10525-3p	NM_206855	QKI	...((((((((((((((((((&.))))...)))))))))))))).	1954	1989	1	-24.2	1	0.00296975	0.603	-0.309585	0.00155788	-6.51454	18	23	14	3UTR		0	0
hsa-miR-10525-3p	NM_206855	QKI	((((....((((((((((...&)))))))))))))).	4986	5001	1	-19.6	1	0.000249264	0.618	0.773347	1.63867	-13.8149	14	15	14	3UTR		0	0
hsa-miR-10525-3p	NM_206909	PSD3	.((..((((((((((((....&))))))))))))..)).	8247	8264	1	-19.7	1	0.0428294	0.456	2.38844	2.25206	-10.9444	14	17	12	3UTR		0	0
hsa-miR-10525-3p	NM_206925	CA12	...(((((((((((.......&))))))))))).	5550	5562	1	-17.9	1	0.00422828	0.441	0	0	-7.48304	11	12	11	3UTR		0	0
hsa-miR-10525-3p	NM_207118	GTF2H5	(((((((((((((((((((..&)))))))).............)))))))....)))).	2613	2650	1	-20	1	0.016086	0.485	0.0930893	0.0840142	-3.93757	19	37	8	3UTR		0	0
hsa-miR-10525-3p	NM_207123	GAB1	...(((((((((.(((.....&))).))))))))).	6222	6236	1	-17.6	1	0.00343275	0.662	0.41404	0.192421	-7.80367	12	14	9	3UTR		0	0
hsa-miR-10525-3p	NM_207292	MBNL1	(((((((.(.(((.(((((..&))))))))).))))))).	3529	3547	1	-18	1	0.00284615	0.574	3.10941	2.81166	-8.35056	16	18	9	3UTR		0	0
hsa-miR-10525-3p	NM_207293	MBNL1	(((((((.(.(((.(((((..&))))))))).))))))).	3583	3601	1	-18	1	0.00284615	0.574	3.10941	2.81166	-8.35056	16	18	9	3UTR		0	0
hsa-miR-10525-3p	NM_207294	MBNL1	(((((((.(.(((.(((((..&))))))))).))))))).	3325	3343	1	-18	1	0.00284615	0.574	3.10941	2.81166	-8.35056	16	18	9	3UTR		0	0
hsa-miR-10525-3p	NM_207295	MBNL1	(((((((.(.(((.(((((..&))))))))).))))))).	3361	3379	1	-18	1	0.00284615	0.574	3.10941	2.81166	-8.35056	16	18	9	3UTR		0	0
hsa-miR-10525-3p	NM_207296	MBNL1	(((((((.(.(((.(((((..&))))))))).))))))).	3439	3457	1	-18	1	0.00284615	0.574	3.10941	2.81166	-8.35056	16	18	9	3UTR		0	0
hsa-miR-10525-3p	NM_207297	MBNL1	(((((((.(.(((.(((((..&))))))))).))))))).	3470	3488	1	-18	1	0.00284615	0.574	3.10941	2.81166	-8.35056	16	18	9	3UTR		0	0
hsa-miR-10525-3p	NM_207335	KBTBD12	((((((((((((((.(((...&))))))))....))))))))).	2798	2820	1	-18.7	1	0.00209999	0.456	0.0650255	0.0124667	-4.67302	17	22	9	3UTR		0	0
hsa-miR-10525-3p	NM_207340	ZDHHC24	(((((((((.(((((((((..&)))))...)))).))))))))).	1383	1406	1	-19.9	1	0.00237726	0.618	0.0297392	-0.0906615	-5.18008	18	23	9	3UTR		0	0
hsa-miR-10525-3p	NM_207348	SLC25A34	.((((((.(((((((......&.))))))).)))))).	1909	1927	1	-19.7	1	1.92336e-07	0.441	-0.154117	-0.158562	-6.34001	13	16	7	3UTR		0	0
hsa-miR-10525-3p	NM_207365	AADACL2	(((..(((((((((.((((((&)))))).......))))))))).))).	3741	3768	1	-18.7	1	0.00669082	0.676	0.689273	-0.0932176	-11.8241	18	27	9	3UTR		0	0
hsa-miR-10525-3p	NM_207411	XKR5	((((((.(((((((((((((.&)))).....))))))))).))).))).	4413	4440	1	-19.4	1	0.0019247	0.574	0	0	-5.48126	19	27	9	3UTR		0	0
hsa-miR-10525-3p	NM_212460	ARL4A	...((((((((.((.(((((.&))))))))))))))).	1575	1591	1	-15.4	1	0.00192431	0.676	2.60501	1.93646	-10.5968	15	16	15	3UTR		0	0
hsa-miR-10525-3p	NM_212535	PRKCB	((.(((..((((((((((((.&.))).)))))))))..))))).	2266	2309	1	-21.4	1	0.00012524	0.529	1.77935	0.941067	-9.35244	17	22	9	3UTR		0	0
hsa-miR-10525-3p	NM_212554	EEF1AKMT2	.((((.(((((((((((((..&))))))))))..))).)))).	3496	3517	1	-21.1	1	0.00323952	0.618	0.132553	0.625002	-5.69428	17	21	10	3UTR		0	0
hsa-miR-10525-3p	NM_212558	TMEM215	.....((((((((((((((..&)))))))).)))))).	1811	1827	1	-19.3	1	0.0498751	0.721	1.23597	0.818176	-13.6656	14	16	8	3UTR		0	0
hsa-miR-10525-3p	NM_213604	ADAMTSL5	((((((((((.((((((....&))))))))))))).))).	2377	2395	1	-20	1	0.00019027	0.441	0.570448	-0.254582	-6.76235	16	18	13	3UTR		0	0
hsa-miR-10525-3p	NM_213655	WNK1	((((((((((((..(((((((&.)))))))..)))))).)))))).	9969	10018	1	-20.9	1	0.0175799	0.574	0.792951	0.887009	-6.08354	19	24	7	3UTR		0	0
hsa-miR-10525-3p	XM_005248542	PIK3R1	((((((((((..((.......&))....)))))))))).	4533	4550	1	-15.6	1	0.0186747	0.485	0	0	-11.0777	12	17	10	3UTR		0	0
hsa-miR-10525-3p	XM_005251467	NFIB	(((((((..(((.((((((..&))))))))).))))))).	7995	8013	1	-19.7	1	4.97566e-05	0.588	0	0	-8.59673	16	18	9	3UTR		0	0
hsa-miR-10525-3p	XM_005252075	TMEM38B	.((((((((.((((.(((...&.)))))))...)))))))).	2948	2968	1	-20.6	1	0.000450957	0.676	0	0	-5.77128	15	20	8	3UTR		0	0
hsa-miR-10525-3p	XM_005252140	WNK2	(((((((.(((((((......&))))))).))))))).	7962	7978	1	-19.1	1	0.000304346	0.515	0	0	-6.48426	14	16	7	3UTR		0	0
hsa-miR-10525-3p	XM_005254750	CHRFAM7A	(((((((...(((..((((..&))))..)))...))))))).	2212	2232	1	-19.5	1	0.00274537	0.441	0	0	-10.1424	14	20	7	3UTR		0	0
hsa-miR-10525-3p	XM_005258786	ZNF283	.(((((((((((((.......&))).)))))))))).	5666	5681	1	-19.2	1	0.000473952	0.588	0	0	-4.76182	13	15	10	3UTR		0	0
hsa-miR-10525-3p	XM_005260908	OLIG2	(((((((...(((((((((..&.))))))))).))))))).	2154	2179	1	-20.9	1	0.0018469	0.574	0	0	-8.55011	16	19	9	3UTR		0	0
hsa-miR-10525-3p	XM_005261109	C2CD2	...(((.(((..((((((((.&))))))))..))).))).	2839	2857	1	-18.7	1	0.0341248	0.647	0	0	-14.2298	14	18	8	3UTR		0	0
hsa-miR-10525-3p	XM_005263462	MTHFR	...(((((((((.((((....&.))))))))))))).	2498	2522	1	-17.8	1	0.000844642	0.471	0	0	-7.80367	13	15	13	3UTR		0	0
hsa-miR-10525-3p	XM_005267310	ANKRD9	...((((((((((((((((..&))))))))))))....)))).	2430	2451	1	-20.4	1	3.50204e-05	0.397	0	0	-6.51454	16	21	12	3UTR		0	0
hsa-miR-10525-3p	XM_005267683	MAP3K9	...((((((.(((((((((..&)))))))..)).)))))).	6277	6296	1	-20.1	1	0.000951936	0.529	0	0	-7.75705	15	19	7	3UTR		0	0
hsa-miR-10525-3p	XM_005267747	SLC22A17	...(((((((((((.......&))))))))))).	4524	4536	1	-16.7	1	0.105166	0.659	0	0	-7.48304	11	12	11	3UTR		0	0
hsa-miR-10525-3p	XM_005268209	NEK9	....(((((((.((((((((.&)))))))).))))))).	4764	4781	1	-18.8	1	0.00341956	0.456	0	0	-12.8934	15	17	8	3UTR		0	0
hsa-miR-10525-3p	XM_005269550	DYDC1	((((((.(((((((.(((...&.)))))))))).)))))).	1519	1555	1	-19.8	1	0.00108892	0.5	0	0	-6.21671	16	19	10	3UTR		0	0
hsa-miR-10525-3p	XM_005272231	PLPP7	...(((((.((.(((((((..&)))))))))))))).	773	788	1	-19.7	1	2.67577e-07	0.353	0	0	-10.9177	14	15	14	3UTR		0	0
hsa-miR-10525-3p	XM_005272686	CASK	.(((((((((.(((.......&))).))))))))).	3377	3391	1	-19.3	1	1.64431e-05	0.5	0	0	-7.5866	12	14	9	3UTR		0	0
hsa-miR-10525-3p	XM_006710417	TMEM201	.(((((.((((((((((((..&))))..))))))))))))).	2751	2771	1	-23	1	0.000385357	0.368	0	0	-5.33701	17	20	13	3UTR		0	0
hsa-miR-10525-3p	XM_006713654	AMOTL2	(((((.((((((.((((((..&)))))).))..........))))))))).	3011	3040	1	-18.8	1	0.011093	0.515	0	0	-7.12766	17	29	9	3UTR		0	0
hsa-miR-10525-3p	XM_006714158	TRIM2	((((((((((((((.(((...&))))))))))))))))).	3470	3488	1	-20.1	1	0.0249193	0.676	0	0	-4.67302	17	18	17	3UTR		0	0
hsa-miR-10525-3p	XM_006714160	TRIM2	((((((((((((((.(((...&))))))))))))))))).	4270	4288	1	-20.1	1	0.0249193	0.676	0	0	-4.67302	17	18	17	3UTR		0	0
hsa-miR-10525-3p	XM_006714161	TRIM2	((((((((((((((.(((...&))))))))))))))))).	4267	4285	1	-20.1	1	0.0249193	0.676	0	0	-4.67302	17	18	17	3UTR		0	0
hsa-miR-10525-3p	XM_006719806	NBEA	(((((((((((((((.(((..&.))).))))))))))))))).	9479	9513	1	-21.4	1	0.000566427	0.618	0	0	-4.17062	18	21	15	3UTR		0	0
hsa-miR-10525-3p	XM_006720191	GPATCH2L	...((((.((.((((((((..&)))))))).)).)))).	3025	3042	1	-20.6	1	0.124404	0.456	0	0	-11.6529	14	17	8	3UTR		0	0
hsa-miR-10525-3p	XM_006720579	RNF111	(((((((.((.((((.(((((&))))).)))).)).))))))).	3867	3889	1	-23.8	1	0.000374496	0.632	0	0	-9.30903	18	22	7	3UTR		0	0
hsa-miR-10525-3p	XM_006720793	SLC12A6	((.(((.(((((((.(((...&))))))))))))))).	5580	5596	1	-18	1	0.00364105	0.559	0	0	-7.77425	15	16	15	3UTR		0	0
hsa-miR-10525-3p	XM_006721243	NOD2	(((((((((((((((.((...&.)).))))))...))))))))).	2510	2547	1	-18.6	1	0.0582645	0.426	0	0	-4.17062	17	23	9	3UTR		0	0
hsa-miR-10525-3p	XM_006722883	KXD1	.((((.((.(((((((((.(.&.).)))))))))..)).)))).	905	953	1	-21.5	1	0.00159207	0.338	0	0	-6.75067	16	22	9	3UTR		0	0
hsa-miR-10525-3p	XM_006723447	ZNF566	.(((((((((((.((((....&.)))).))))))))))).	2358	2406	1	-24	1	0.00014962	0.647	0	0	-5.08246	15	18	11	3UTR		0	0
hsa-miR-10525-3p	XM_006723784	KCNB1	(((((((.((((((.......&)))))).))))))).	10887	10902	1	-20.2	1	1.91644e-05	0.515	0	0	-7.21971	13	15	7	3UTR		0	0
hsa-miR-10525-3p	XM_006724504	NLGN4X	...((((((((((((((((..&))))))).....))))))))).	3341	3363	1	-20.4	1	1.72457e-05	0.485	0	0	-6.51454	16	22	9	3UTR		0	0
hsa-miR-10525-3p	XM_006724566	CASK	.(((((((((.(((.......&))).))))))))).	3272	3286	1	-19.3	1	1.64431e-05	0.5	0	0	-7.5866	12	14	9	3UTR		0	0
hsa-miR-10525-3p	XM_011510070	PPFIA4	(((((((((.(((((((.(((&)))..))))).......)).))))))))).	4183	4213	1	-19.5	1	0.00976942	0.588	0	0	-5.18008	19	30	9	3UTR		0	1
hsa-miR-10525-3p	XM_011512285	LOC105373780	(((((((((.((((((.....&.))))))))))))))).	2067	2118	1	-23	1	0.0110825	0.544	0	0	-5.18008	15	17	15	3UTR		0	0
hsa-miR-10525-3p	XM_011513235	CHCHD6	(((((((..(((((.(((.((&)).)))))))).))))))).	3074	3094	1	-21.4	1	2.09304e-05	0.412	0	0	-8.04305	17	20	8	3UTR		0	0
hsa-miR-10525-3p	XM_011516020	OR2F1	(((((((..((((((......&))))))..))))))).	2793	2809	1	-17.8	1	0.0103921	0.662	0	0	-7.54065	13	16	7	3UTR		0	0
hsa-miR-10525-3p	XM_011517017	ZNF517	.(((((((((....(((((((&)))))))))))))))).	2581	2598	1	-19.5	1	0.00324399	0.588	0	0	-12.1109	16	17	16	3UTR		0	0
hsa-miR-10525-3p	XM_011518311	KIAA1958	((((((((((.(((((((...&.)))))))))))))).))).	7062	7102	1	-21.9	1	0.000100914	0.441	0	0	-6.76235	17	20	14	3UTR		0	0
hsa-miR-10525-3p	XM_011519747	CUL2	((((((((((((((((.((((&))))...)))).))))))))...)))).	2676	2704	1	-18.9	1	0.00574708	0.574	0	0	-3.93757	20	28	8	3UTR		0	0
hsa-miR-10525-3p	XM_011520754	ATF7IP	.(((((((.((((((((((..&.))))))))))))))))).	4978	5009	1	-26.5	1	0.0293184	0.5	0	0	-4.84971	17	19	17	3UTR		0	0
hsa-miR-10525-3p	XM_011520853	SSPN	(((.((((((((((((((((.&))))))))))))))))...))).	4011	4034	1	-19.5	1	0.000593193	0.676	0	0	-6.9696	19	23	16	3UTR		0	0
hsa-miR-10525-3p	XM_011520855	SSPN	(((.((((((((((((((((.&))))))))))))))))...))).	3854	3877	1	-19.5	1	0.000593193	0.676	0	0	-6.9696	19	23	16	3UTR		0	0
hsa-miR-10525-3p	XM_011520997	WNK1	((((((((((((..(((((((&.)))))))..)))))).)))))).	10438	10487	1	-20.9	1	0.0175799	0.574	0	0	-6.08354	19	24	7	3UTR		0	0
hsa-miR-10525-3p	XM_011521005	WNK1	((((((((((((..(((((((&.)))))))..)))))).)))))).	8917	8966	1	-20.9	1	0.0175799	0.574	0	0	-6.08354	19	24	7	3UTR		0	0
hsa-miR-10525-3p	XM_011521176	CHRNA7	(((((((...(((..((((..&))))..)))...))))))).	2167	2187	1	-19.5	1	0.00274537	0.441	0	0	-10.1424	14	20	7	3UTR		0	0
hsa-miR-10525-3p	XM_011521178	CHRNA7	(((((((...(((..((((..&))))..)))...))))))).	1749	1769	1	-19.5	1	0.00274537	0.441	0	0	-10.1424	14	20	7	3UTR		0	0
hsa-miR-10525-3p	XM_011522510	PARN	(((((((((((((((..(((.&))).))))))))))).)))).	2253	2274	1	-17.6	1	0.0522281	0.603	0	0	-4.17062	18	21	11	3UTR		0	0
hsa-miR-10525-3p	XM_011523253	RBL2	(.(((..(((((((((((((.&)))))))))))...))..))).).	3525	3549	1	-19.6	1	0.00623699	0.529	0	0	-8.5459	17	24	11	3UTR		0	0
hsa-miR-10525-3p	XM_011523279	SIAH1	((((.((((((((((((((..&))))..))))).))))))))).	7154	7176	1	-20.9	1	0.000877649	0.559	0	0	-8.05661	18	22	9	3UTR		0	0
hsa-miR-10525-3p	XM_011523279	SIAH1	....(((((((((((((((..&)))))))...)))))))).	5358	5377	1	-19.6	1	5.84966e-05	0.574	0	0	-9.54656	15	19	8	3UTR		0	0
hsa-miR-10525-3p	XM_011523284	MTHFSD	...((((((((((((((((..&.))))..)))))))))))).	1361	1404	1	-21.8	1	0.000336488	0.382	0	0	-6.51454	16	20	12	3UTR		0	0
hsa-miR-10525-3p	XM_011526336	LILRB1	(((((((..(((((.((((..&))))))))))))).))).	2239	2257	1	-16.7	1	4.49736e-05	0.471	0	0	-8.04305	16	18	13	3UTR		0	0
hsa-miR-10525-3p	XM_011526687	FPR3	(((((..((((((.(((....&))))))))).))))).	2012	2028	1	-16.3	1	0.00290293	0.574	0	0	-8.23906	14	16	9	3UTR		0	0
hsa-miR-10525-3p	XM_011527428	ZNF566	.(((((((((((.((((....&.)))).))))))))))).	2120	2168	1	-24	1	0.00014962	0.647	0	0	-5.08246	15	18	11	3UTR		0	0
hsa-miR-10525-3p	XM_011528272	KXD1	.((((.((.(((((((((.(.&.).)))))))))..)).)))).	1775	1809	1	-21.5	1	0.00159207	0.338	0	0	-6.75067	16	22	9	3UTR		0	0
hsa-miR-10525-3p	XM_011528831	SLC35C2	..(((((((((.((.((((..&)))))).))))))))).	1693	1710	1	-22.2	1	8.36477e-06	0.368	0	0	-9.03925	15	17	9	3UTR		0	0
hsa-miR-10525-3p	XM_011529638	SETD4	((((((.(((((((.......&))))))))))))).	1863	1877	1	-16	1	0.00445451	0.603	0	0	-6.44976	13	14	13	3UTR		0	0
hsa-miR-10525-3p	XM_011530237	MIEF1	(((((.(((((.((((.....&))))))))).))))).	4848	4864	1	-16.6	1	0.000633307	0.632	0	0	-9.18534	14	16	9	3UTR		0	0
hsa-miR-10525-3p	XM_011533047	SLC3A1	.....((((((((((((((..&.)))))))))))))).	1789	1817	1	-24.9	1	0.00193578	0.544	0	0	-13.6656	14	16	14	3UTR		0	0
hsa-miR-10525-3p	XM_011533435	PRICKLE2	(((((((((((.(((((....&))))))))))))....)))).	3652	3673	1	-17.1	1	0.000260869	0.574	0	0	-7.28438	16	21	12	3UTR		0	0
hsa-miR-10525-3p	XM_011534197	CADPS	.(((((.((((((((.(((((&)))))))))))))..))))).	4387	4408	1	-21	1	0.00362932	0.588	0	0	-5.57006	18	21	13	3UTR		0	0
hsa-miR-10525-3p	XM_011536259	QKI	((((....((((((((((...&)))))))))))))).	3597	3612	1	-19.6	1	0.000249264	0.618	0	0	-13.8149	14	15	14	3UTR		0	0
hsa-miR-10525-3p	XM_011537911	ANO4	((.((((((((((((......&)))))))))))).)).	3677	3693	1	-17.3	1	0.00243086	0.603	0	0	-5.72816	14	16	12	3UTR		0	1
hsa-miR-10525-3p	XM_011537985	C12orf50	.((((((((.((((((((((.&.))))).))))).)))))))).	2749	2795	1	-20.1	1	0.0024561	0.632	0	0	-5.03583	18	22	8	3UTR		0	0
hsa-miR-10525-3p	XM_011541495	MTHFR	...(((((((((.((((....&.))))))))))))).	3248	3272	1	-17.8	1	0.000844642	0.471	0	0	-7.80367	13	15	13	3UTR		0	0
hsa-miR-10525-3p	XM_011541496	MTHFR	...(((((((((.((((....&.))))))))))))).	2345	2369	1	-17.8	1	0.000844642	0.471	0	0	-7.80367	13	15	13	3UTR		0	0
hsa-miR-10525-3p	XM_011542052	TBX15	...(((((..((((((((...&.))))))))..))))).	2336	2363	1	-20.1	1	0.00441879	0.456	0	0	-8.81344	13	17	8	3UTR		0	0
hsa-miR-10525-3p	XM_011542498	PLPPR4	....(((.((((((((((((.&))))))))).))).))).	4346	4364	1	-18.8	1	0.00695598	0.647	0	0	-11.8602	15	18	9	3UTR		0	0
hsa-miR-10525-3p	XM_011543146	EMB	((((((((((.(((((((...&.))))))).)))...))))))).	1737	1788	1	-22.5	1	0.0765755	0.618	0	0	-6.76235	17	23	7	3UTR		0	0
hsa-miR-10525-3p	XM_011543892	DDX3X	..(((((((((((((((((..&))))))))).....................)))))))).	3437	3476	1	-19.2	1	0.0020014	0.603	0	0	-4.957	17	39	9	3UTR		0	0
hsa-miR-10525-3p	XM_011543994	CASK	.(((((((((.(((.......&))).))))))))).	2920	2934	1	-19.3	1	1.64431e-05	0.5	0	0	-7.5866	12	14	9	3UTR		0	0
hsa-miR-10525-3p	XM_011543995	CASK	.(((((((((.(((.......&))).))))))))).	2887	2901	1	-19.3	1	1.64431e-05	0.5	0	0	-7.5866	12	14	9	3UTR		0	0
hsa-miR-10525-3p	XM_011544655	UBXN8	.((((.(((((((((((((((&))))))))))))))).)))).	2383	2404	1	-21.4	1	0.000737352	0.676	0	0	-5.69428	19	21	15	3UTR		0	0
hsa-miR-10525-3p	XM_017000154	CHRM3	((((((((((((((((..((.&.)).))))))))))...................)))))).	7798	7845	1	-20.6	1	6.2421e-06	0.529	0	0	-3.93757	18	40	10	3UTR		0	0
hsa-miR-10525-3p	XM_017000771	KAZN	...((((.((((((((((...&)))))))))))))).	1538	1553	1	-18.7	1	1.12139e-06	0.279	0	0	-8.82818	14	15	14	3UTR		0	0
hsa-miR-10525-3p	XM_017001280	FAM177B	..((((((((..((((((...&))))))....)))))))).	2775	2794	1	-20.1	1	0.000325745	0.706	0	0	-11.1286	14	19	8	3UTR		0	0
hsa-miR-10525-3p	XM_017002219	TNR	(.((((((((((((((((.((&)).)))))))...))))))))).).	5292	5317	1	-19	1	0.0035527	0.544	0	0	-5.10125	19	25	9	3UTR		0	0
hsa-miR-10525-3p	XM_017003387	MTERF4	.((((((..((((((.(((..&.)))))))))..)))))).	2433	2474	1	-20	1	9.4274e-06	0.426	0	0	-7.3964	15	19	9	3UTR		0	0
hsa-miR-10525-3p	XM_017005753	C3orf22	.((((....(((((((((...&)))))))))..)))).	5101	5117	1	-20.3	1	2.2573e-05	0.397	0	0	-10.608	13	16	9	3UTR		0	0
hsa-miR-10525-3p	XM_017005819	DLG1	.((((((((((((........&.)))))))))))).	2840	2859	1	-19	1	0.0105825	0.588	0	0	-5.61866	12	14	12	3UTR		0	0
hsa-miR-10525-3p	XM_017007017	SCN5A	.((((((((((((.(((((..&))))))))))))).)))).	6825	6844	1	-18.3	1	0.0140119	0.559	0	0	-4.65016	17	19	13	3UTR		0	0
hsa-miR-10525-3p	XM_017007170	SLMAP	((((((((((((((((..(((&.)))..))))).))))))))))).	2506	2547	1	-21	1	0.000895522	0.676	0	0	-3.93757	19	24	11	3UTR		0	0
hsa-miR-10525-3p	XM_017007944	TRIM2	((((((((((((((.(((...&))))))))))))))))).	4258	4276	1	-20.1	1	0.0249193	0.676	0	0	-4.67302	17	18	17	3UTR		0	0
hsa-miR-10525-3p	XM_017007946	TRIM2	((((((((((((((.(((...&))))))))))))))))).	3575	3593	1	-20.1	1	0.0249193	0.676	0	0	-4.67302	17	18	17	3UTR		0	0
hsa-miR-10525-3p	XM_017007947	TRIM2	((((((((((((((.(((...&))))))))))))))))).	3572	3590	1	-20.1	1	0.0249193	0.676	0	0	-4.67302	17	18	17	3UTR		0	0
hsa-miR-10525-3p	XM_017007948	TRIM2	((((((((((((((.(((...&))))))))))))))))).	3525	3543	1	-20.1	1	0.0249193	0.676	0	0	-4.67302	17	18	17	3UTR		0	0
hsa-miR-10525-3p	XM_017007950	TRIM2	((((((((((((((.(((...&))))))))))))))))).	3978	3996	1	-20.1	1	0.0249193	0.676	0	0	-4.67302	17	18	17	3UTR		0	0
hsa-miR-10525-3p	XM_017007957	CNOT6L	(((((.((((((((((.((..&.)).))))))))))))))).	5190	5215	1	-20.6	1	0.00303964	0.544	0	0	-5.83853	17	20	15	3UTR		0	0
hsa-miR-10525-3p	XM_017008044	GPRIN3	(((((((((((((((((((((&))))))....)))).))))))))))).	8760	8787	1	-23.2	1	0.00585872	0.574	0	0	-3.93757	21	27	11	3UTR		0	0
hsa-miR-10525-3p	XM_017008851	TMPRSS11D	..((((((.((((((((((((&)))))))))...)))....)))))).	1563	1589	1	-19.9	1	0.169381	0.721	0	0	-6.01339	18	26	9	3UTR		0	0
hsa-miR-10525-3p	XM_017009155	TENT2	.((..(((((((((((((...&.)))))))))...))))..)).	3500	3536	1	-19.3	1	0.304949	0.721	0	0	-10.9444	15	22	9	3UTR		0	0
hsa-miR-10525-3p	XM_017009664	TENM2	....((((((((((((((...&))))))).))))))).	9027	9043	1	-19.6	1	0.000918989	0.5	0	0	-9.54656	14	16	7	3UTR		0	0
hsa-miR-10525-3p	XM_017011380	LRP11	.((((((.(.(((((((....&.)))))))).)))))).	2505	2536	1	-21.3	1	0.000134149	0.456	0	0	-7.34947	14	17	8	3UTR		0	0
hsa-miR-10525-3p	XM_017012776	CCDC126	((((((((((((((.((((((&))))))...)))))))))...........))))).	1695	1730	1	-19.3	1	0.00111834	0.676	0	0	-4.67302	20	35	9	3UTR		0	0
hsa-miR-10525-3p	XM_017012776	CCDC126	....(((.(((((((((((..&))))))))))).))).	1797	1813	1	-16.8	1	0.0723051	0.647	0	0	-11.8602	14	16	11	3UTR		0	0
hsa-miR-10525-3p	XM_017012819	DOCK4	.((((((((((((((.(((((&)))))))))))))........)))))).	6947	6975	1	-21.9	1	0.0283103	0.632	0	0	-4.02637	19	28	13	3UTR		0	0
hsa-miR-10525-3p	XM_017014199	SEMA4D	(((((((((((.((((((...&))))))))))))))).)).	4521	4540	1	-20.5	1	2.54815e-06	0.441	0	0	-7.28438	17	19	15	3UTR		0	0
hsa-miR-10525-3p	XM_017017883	COA4	(((..((((((((((.(((..&))).))))))))))...))).	1554	1575	1	-17.6	1	0.26002	0.662	0	0	-11.3217	16	21	10	3UTR		0	0
hsa-miR-10525-3p	XM_017017884	COA4	(((..((((((((((.(((..&))).))))))))))...))).	1391	1412	1	-17.6	1	0.26002	0.662	0	0	-11.3217	16	21	10	3UTR		0	0
hsa-miR-10525-3p	XM_017018107	RIC8A	((.((.((.(((((((((...&.))))))))))).)))).	3189	3216	1	-18.4	1	0.000157812	0.397	0	0	-8.45246	15	18	11	3UTR		0	0
hsa-miR-10525-3p	XM_017018230	BEST1	..((((((((((.((.(((((&))))).)).)))))))))).	3248	3268	1	-21.9	1	0.000952931	0.5	0	0	-6.47918	17	20	10	3UTR		0	0
hsa-miR-10525-3p	XM_017022206	MFGE8	..((((((((((.(((((...&))))))))))))))).	2559	2575	1	-21.3	1	0.000301173	0.544	0	0	-6.24613	15	16	15	3UTR		0	0
hsa-miR-10525-3p	XM_017022283	SCAPER	(((((((((((....(((((.&)))))))))))))))).	5292	5309	1	-19.1	1	0.00605449	0.662	0	0	-10.1658	16	17	16	3UTR		0	0
hsa-miR-10525-3p	XM_017022378	DPP8	((((((((((((.((((((((&))))).))).)...))))))))))).	5178	5204	1	-22.2	1	0.0247346	0.691	0	0	-5.22671	20	26	11	3UTR		0	1
hsa-miR-10525-3p	XM_017022761	SV2B	((.((((.((.(((((((...&.))))))).)).)))).)).	11121	11153	1	-20.3	1	0.00330876	0.515	0	0	-10.6335	15	20	7	3UTR		0	1
hsa-miR-10525-3p	XM_017022761	SV2B	(((((((....((((((((..&.))))))))....))))))).	3483	3506	1	-20.1	1	0.00190387	0.559	0	0	-11.3749	15	21	8	3UTR		0	1
hsa-miR-10525-3p	XM_017023528	SRL	.((((...((.(((.((((((&))))))))).)).....)))).	1607	1629	1	-17.9	1	0.00244298	0.426	0	0	-13.1118	15	22	9	3UTR		0	0
hsa-miR-10525-3p	XM_017025234	USP32	(((((((.((((((.((((..&.)))).)))))).))))))).	4519	4550	1	-22.8	1	0.0059827	0.485	0	0	-6.98666	17	21	7	3UTR		0	0
hsa-miR-10525-3p	XM_017025355	PIGL	.((((.((((((((((((...&.))))))))))))...)))).	1689	1737	1	-23.9	1	0.0258692	0.559	0	0	-5.69428	16	21	12	3UTR		0	0
hsa-miR-10525-3p	XM_017025356	PIGL	.((((.((((((((((((...&.))))))))))))...)))).	2783	2831	1	-23.9	1	0.0223047	0.618	0	0	-5.69428	16	21	12	3UTR		0	0
hsa-miR-10525-3p	XM_017026033	CHST9	.(((((((((.((((((((((&)))))))))))))))).))).	4147	4168	1	-20.6	1	0.0167548	0.662	0	0	-6.6181	19	21	16	3UTR		0	0
hsa-miR-10525-3p	XM_017027281	KXD1	.((((.((.(((((((((.(.&.).)))))))))..)).)))).	1203	1251	1	-21.5	1	0.00159207	0.338	0	0	-6.75067	16	22	9	3UTR		0	0
hsa-miR-10525-3p	XM_017028281	DSCAM	.(((((((((((((((((.((&.)).))))))))))).)))))).	7347	7378	1	-23.7	1	0.000143441	0.544	0	0	-3.79332	19	23	11	3UTR		0	0
hsa-miR-10525-3p	XM_017029313	DDX3X	..(((((((((((((((((..&))))))))).....................)))))))).	5745	5784	1	-19.2	1	0.0020014	0.603	0	0	-4.957	17	39	9	3UTR		0	0
hsa-miR-10525-3p	XM_024446835	AGK	.(((((((((((((.......&))))))))))))).	3588	3602	1	-18.4	1	9.29504e-05	0.588	0	0	-4.76182	13	14	13	3UTR		0	0
hsa-miR-10525-3p	XM_024446993	CCDC126	((((((((((((((.((((((&))))))...)))))))))...........))))).	1598	1633	1	-19.3	1	0.00111834	0.676	0	0	-4.67302	20	35	9	3UTR		0	0
hsa-miR-10525-3p	XM_024446993	CCDC126	....(((.(((((((((((..&))))))))))).))).	1700	1716	1	-16.8	1	0.0723051	0.647	0	0	-11.8602	14	16	11	3UTR		0	0
hsa-miR-10525-3p	XM_024447005	CREB5	((((((((((.((((((....&.))))))))))))).))).	2845	2870	1	-19.7	1	7.94793e-05	0.471	0	0	-6.76235	16	19	13	3UTR		0	0
hsa-miR-10525-3p	XM_024447005	CREB5	.(((...((((((((((....&)))))))))).....))).	6571	6590	1	-19.5	1	0.00113282	0.5	0	0	-11.357	13	19	10	3UTR		0	0
hsa-miR-10525-3p	XM_024448118	RGR	...(((((.(((((((.....&))))))).))))).	2103	2117	1	-17.8	1	4.05457e-05	0.544	0	0	-7.57093	12	14	7	3UTR		0	0
hsa-miR-10525-3p	XM_024448693	CCDC82	.((((((..(.((((((((((&)))))))))....).)..)))))).	4524	4549	1	-19.7	1	0.0105485	0.647	0	0	-9.98812	17	25	9	3UTR		0	0
hsa-miR-10525-3p	XM_024451337	RDH13	.(((((((.(((((((.....&.)))))))))))))).	1817	1840	1	-18	1	0.029938	0.471	0	0	-4.84971	14	16	14	3UTR		0	0
hsa-miR-10525-3p	XM_024451338	RDH13	.(((((((.(((((((.....&)))))))))))))).	2107	2122	1	-18	1	0.029938	0.471	0	0	-4.84971	14	15	14	3UTR		0	0
hsa-miR-10525-3p	XM_024451459	ZNF283	.(((((((((((((.......&))).)))))))))).	5513	5528	1	-19.2	1	0.000473952	0.588	0	0	-4.76182	13	15	10	3UTR		0	0
hsa-miR-10525-3p	XM_024452141	ABCG1	(((((..((((.(((((((..&))))))).))))....))))).	3668	3690	1	-21.3	1	0.00039585	0.471	0	0	-10.729	16	22	7	3UTR		0	0
hsa-miR-10525-3p	XM_024452298	HPS4	(((((((((((((...((((.&.))))......))))))))))))).	5748	5811	1	-17.7	1	0.00934068	0.632	0	0	-5.76291	17	25	13	3UTR		0	0
hsa-miR-10525-3p	XM_024452473	CASK	.(((((((((.(((.......&))).))))))))).	2495	2509	1	-19.3	1	1.64431e-05	0.5	0	0	-7.5866	12	14	9	3UTR		0	0
hsa-miR-10525-3p	XM_024453560	RSRC1	.(((((((.((((((((((((&)))))).)))))).))....))))).	3575	3601	1	-21.8	1	0.000770714	0.559	0	0	-4.84971	19	26	6	3UTR		0	0
hsa-miR-10525-3p	NM_014568	GALNT5	.(((.....(((((((((((.&))))))))))).....))).	9149	9169	1	-20.3	1	0.00561193	0.632	-0.35847	-0.109141	-14.727	14	20	11	3UTR		0	0
hsa-miR-10525-3p	NM_014571	HEYL	(((.(((((((((.(((((..&))))))))))))))))).	3536	3554	1	-19.3	1	0.0454627	0.603	0	0	-7.82644	17	18	17	3UTR		0	0
hsa-miR-10525-3p	NM_014613	FAF2	((((...((((((((((((..&)))).))))))))..)))).	3682	3702	1	-21.2	1	0.000404141	0.588	-0.158863	0.416735	-11.5013	16	20	8	3UTR		0	0
hsa-miR-10525-3p	NM_014631	SH3PXD2A	(.((((((.(.((((((((..&))))).))).))))))).).	4722	4742	1	-19.1	1	0.00413634	0.471	0.748252	0.803603	-8.98241	16	20	7	3UTR		0	0
hsa-miR-10525-3p	NM_014661	FAM53B	...((((((((((.(((((..&))))).)))))))))).	3990	4007	1	-18.2	1	0.000247435	0.397	2.17982	1.71636	-7.37138	15	17	10	3UTR		0	0
hsa-miR-10525-3p	NM_014704	CEP104	(((.((((.((((((((((..&))))))))))....)))).))).	4789	4812	1	-20.5	1	0.00130792	0.574	3.25825	3.63964	-8.02599	17	23	10	3UTR		0	0
hsa-miR-10525-3p	NM_014707	HDAC9	.(((((((((((((((.....&.))))).)))))))))).	2625	2669	1	-20	1	0.0088667	0.647	0.981732	0.90123	-3.79332	15	18	10	3UTR		0	0
hsa-miR-10525-3p	NM_014747	RIMS3	...(((.(.((((((((((..&)))))))))).)))).	7120	7136	1	-20.4	1	2.13583e-08	0.426	1.03206	1.3173	-9.11462	14	16	10	3UTR		0	1
hsa-miR-10525-3p	NM_014766	SCRN1	((((((((((((((.((((((&))))))))))))))....)))))).	3635	3660	1	-19.4	1	0.000145594	0.574	0.498361	0.480764	-4.67302	20	25	14	3UTR		0	0
hsa-miR-10525-3p	NM_014781	RB1CC1	.....(((((((((((((((.&)))..)))))))))))).	5432	5450	1	-18.9	1	0.00699629	0.647	2.45195	3.94712	-13.6656	15	18	12	3UTR		0	0
hsa-miR-10525-3p	NM_014790	JAKMIP2	......((.((((((((((..&)))))))))).)).	5195	5209	1	-19.6	0	0.000363256	0.559	0.101638	0.742685	-16.6229	12	14	10	3UTR		0	0
hsa-miR-10525-3p	NM_014805	EPM2AIP1	.(((((.((.(((((((((..&)))))))))..)).))))).	4475	4495	1	-22.1	1	0.000713102	0.544	0.461165	0.187012	-6.57952	16	20	9	3UTR		0	0
hsa-miR-10525-3p	NM_014810	CEP350	.(((((((((((.((......&)).))))))))))).	10116	10131	1	-17.4	1	0.004845	0.647	0.492606	1.1889	-5.3155	13	15	11	3UTR		0	0
hsa-miR-10525-3p	NM_014823	WNK1	((((((((((((..(((((((&.)))))))..)))))).)))))).	8469	8518	1	-20.9	1	0.0175799	0.574	1.27269	0.834681	-6.08354	19	24	7	3UTR		0	0
hsa-miR-10525-3p	NM_014828	TOX4	(((((((((((((((((((((&.))))))).)))))))..))))))).	4358	4395	1	-23	1	0.00143385	0.5	4.53291	2.3504	-3.93757	21	26	7	3UTR		0	0
hsa-miR-10525-3p	NM_014839	PLPPR4	....(((.((((((((((((.&))))))))).))).))).	4198	4216	1	-18.8	1	0.00695598	0.647	3.29596	2.09221	-11.8602	15	18	9	3UTR		0	0
hsa-miR-10525-3p	NM_014887	N4BP2L2	((((((.(((((((.((....&)).))))))).)))))).	5294	5312	1	-18.2	1	0.00531562	0.706	0.445538	0.286168	-6.21671	15	18	7	3UTR		0	0
hsa-miR-10525-3p	NM_014906	PPM1E	.((((((((((((.(((....&.))).)))))))))))).	4319	4354	1	-21.1	1	0.00304922	0.647	1.16261	0.868804	-4.65016	15	18	12	3UTR		0	0
hsa-miR-10525-3p	NM_014932	NLGN1	(((((((((((((((......&)))...)))))))))))).	11799	11818	1	-18.9	1	0.00154952	0.676	0.0168625	-0.0140241	-4.17062	15	19	12	3UTR		0	0
hsa-miR-10525-3p	NM_014962	BTBD3	.(((((.(((((((((.....&)))))))))))))).	1985	2000	1	-19.2	1	0.000217695	0.5	0.672694	2.23494	-5.33701	14	15	14	3UTR		0	0
hsa-miR-10525-3p	NM_015045	WAPL	.(((.(((((((((((((((.&)))))).)).)))))))))).	5246	5267	1	-18.9	1	0.00621746	0.706	2.83387	2.27934	-7.91236	18	21	10	3UTR		0	0
hsa-miR-10525-3p	NM_015063	SLC8A2	...(((.(((((((((((...&))))))))))).))).	3703	3719	1	-20.1	1	0.000700227	0.412	0.692107	2.3085	-8.05823	14	16	11	3UTR		0	0
hsa-miR-10525-3p	NM_015071	ARHGAP26	..((((.((.((((((((((.&)))))))))).)).)))).	4915	4934	1	-21	1	0.00124452	0.574	1.9767	0.610252	-7.74319	16	19	10	3UTR		0	0
hsa-miR-10525-3p	NM_015071	ARHGAP26	(.(((((((((.((.((((..&)))).)).))))))))).).	5240	5260	1	-17.7	1	0.00507805	0.603	-0.67883	0.0421452	-9.1835	16	20	9	3UTR		0	0
hsa-miR-10525-3p	NM_015082	FSTL4	((((((((.((.(((.(((((&))))).)))...)))))))))).	3085	3108	1	-19.3	1	0.122975	0.471	1.90131	3.51597	-8.57382	18	23	10	3UTR		0	1
hsa-miR-10525-3p	NM_015141	GPD1L	...(((((((((((((((((.&)))))......)))))))))))).	3420	3444	1	-19.4	1	0.062148	0.676	0.0584031	0.347864	-6.51454	17	24	12	3UTR		0	0
hsa-miR-10525-3p	NM_015161	ARL6IP1	((.((((((((.(((((....&))))).)))))))))).	2058	2075	1	-18.3	1	0.000323724	0.721	5.90054	4.39385	-8.84192	15	17	10	3UTR		0	0
hsa-miR-10525-3p	NM_015271	TRIM2	((((((((((((((.(((...&))))))))))))))))).	3464	3482	1	-20.1	1	0.0249193	0.676	2.54984	2.44681	-4.67302	17	18	17	3UTR		0	0
hsa-miR-10525-3p	NM_015313	ARHGEF12	(((((((((((.((.......&))))))))))))).	7882	7896	1	-17.2	1	2.99836e-05	0.574	0.248034	-0.0879059	-8.25288	13	14	13	3UTR		0	0
hsa-miR-10525-3p	NM_015323	UFL1	.........((((((((((..&)))))))))).	3068	3079	1	-18.9	0	0.00111479	0.471	-0.162997	-0.217506	-20.4803	10	11	10	3UTR		0	0
hsa-miR-10525-3p	NM_015339	ADNP	...((((((((.((((.....&.)))).)))))))).	4601	4623	1	-17.1	1	0.00296234	0.574	2.89764	2.31087	-9.86134	12	15	8	3UTR		0	0
hsa-miR-10525-3p	NM_015367	BCL2L13	...(((((.(((((.((((..&)))))))))))))).	3123	3138	1	-19.2	1	1.3075e-05	0.5	0.147921	0.444574	-8.30638	14	15	14	3UTR		0	0
hsa-miR-10525-3p	NM_015374	SUN2	...(((((((((((((.....&)).))))))))))).	2683	2698	1	-16.5	1	0.0154474	0.485	1.98539	0.979039	-6.51454	13	15	11	3UTR		0	0
hsa-miR-10525-3p	NM_015483	KBTBD2	........(((((((((((((&))))))))))))).	3003	3017	1	-17.1	0	0.0156143	0.662	4.7413	5.03455	-19.4239	13	14	13	3UTR		0	0
hsa-miR-10525-3p	NM_015488	PNKD	(((((..((.(((((((((..&.))))))))).)).))))).	2403	2431	1	-21.3	1	0.00550499	0.426	-0.428186	0.291521	-8.62473	16	20	9	3UTR		0	0
hsa-miR-10525-3p	NM_015514	NGDN	...((((....((((((((((&))))))))))..)))).	967	984	1	-19.5	1	0.00168124	0.515	0.120057	1.00379	-13.9518	14	17	10	3UTR		0	0
hsa-miR-10525-3p	NM_015560	OPA1	..(((((((((((((((....&)))))........)))))))))).	6179	6203	1	-19.4	1	0.0180766	0.618	-0.0646571	0.0745516	-4.957	15	24	10	3UTR		0	0
hsa-miR-10525-3p	NM_015640	SERBP1	......((.(((((((((((.&))))))))))))).	4411	4425	1	-17.9	0	0.045629	0.662	0.636697	0.506141	-16.6229	13	14	13	3UTR		0	0
hsa-miR-10525-3p	NM_015642	ZBTB20	...((((((((.((((((((.&)))))))))))))))).	5611	5628	1	-22.2	1	8.16524e-06	0.574	0.321134	0.398744	-9.86134	16	17	16	3UTR		0	0
hsa-miR-10525-3p	NM_015642	ZBTB20	(((((((((((((((((((..&))))...))))))......))))))))).	24639	24668	1	-21.1	1	0.00130316	0.603	3.96064	4.6885	-3.93757	19	29	9	3UTR		0	0
hsa-miR-10525-3p	NM_015642	ZBTB20	....((((((((((((((.(.&).)))).)))))))))).	21205	21223	1	-20.3	1	0.00111587	0.676	0.1351	0.245848	-9.54656	15	18	10	3UTR		0	0
hsa-miR-10525-3p	NM_015678	NBEA	(((((((((((((((.(((..&.))).))))))))))))))).	9505	9539	1	-21.4	1	0.000566427	0.618	4.04273	2.45651	-4.17062	18	21	15	3UTR		0	0
hsa-miR-10525-3p	NM_015881	DKK3	(((((..(((((((((((.(.&).)))..)))))))).........))))).	2168	2198	1	-17.6	1	0.00905683	0.662	3.47754	1.82313	-7.38222	17	30	8	3UTR		0	0
hsa-miR-10525-3p	NM_015901	NUDT13	((((((.((.(((((((((..&.))))))))))))))))).	1678	1699	1	-21.1	1	0.000641843	0.706	0.145037	0.0976003	-6.72377	17	19	17	3UTR		0	0
hsa-miR-10525-3p	NM_015910	WDPCP	...(((.((((.(((((((..&)))))))))))))).	3360	3375	1	-17.4	1	0.000876919	0.529	4.84947	1.69423	-11.405	14	15	14	3UTR		0	0
hsa-miR-10525-3p	NM_015945	SLC35C2	..(((((((((.((.((((..&)))))).))))))))).	1482	1499	1	-22.2	1	8.36477e-06	0.368	-0.103935	0.0239327	-9.03925	15	17	9	3UTR		0	0
hsa-miR-10525-3p	NM_015962	FCF1	((.(((((((((((..((((.&))))..))))))))))).)).	2627	2648	1	-21.9	1	0.00132281	0.588	-0.0413137	0.292865	-6.46361	17	21	11	3UTR		0	0
hsa-miR-10525-3p	NM_016010	ZC2HC1A	..((((((((((((.......&)))))))))))).	2285	2298	1	-16.4	1	0.0548241	0.647	-0.258432	0.0213312	-5.9255	12	13	12	3UTR		0	0
hsa-miR-10525-3p	NM_016044	FAHD2A	..((((((.((((((((((..&)))))))...))))))))).	4113	4133	1	-20.6	1	8.91151e-05	0.559	-0.0483669	-0.127803	-6.01339	16	20	9	3UTR		0	0
hsa-miR-10525-3p	NM_016073	HDGFL3	.((((((((((((((((....&)))))))))).)))))).	11308	11326	1	-20.9	1	0.000902264	0.5	2.00503	2.70752	-3.79332	16	18	10	3UTR		0	0
hsa-miR-10525-3p	NM_016073	HDGFL3	.((((((((((((((((....&))))))))..............)))))))).	6340	6371	1	-19.6	1	0.000161631	0.485	1.11139	0.981091	-3.79332	16	31	8	3UTR		0	0
hsa-miR-10525-3p	NM_016079	CHMP3	.((((...((((((((((.(.&.).))))))))))...)))).	1352	1402	1	-20.8	1	0.0008744	0.485	-0.19591	0.0626541	-9.55161	15	21	10	3UTR		0	0
hsa-miR-10525-3p	NM_016096	ZNF706	...(((((..(((((((((((&)))))))))))..))))).	1113	1132	1	-19.9	1	0.00404341	0.515	0.455045	0.599177	-8.81344	16	19	11	3UTR		0	0
hsa-miR-10525-3p	NM_016143	NSFL1C	...(((((((.(.((((((..&)))))).).))))))).	2634	2651	1	-19.6	1	0.00282265	0.544	2.85726	3.42466	-10.6284	14	17	7	3UTR		0	0
hsa-miR-10525-3p	NM_016173	HEMK1	((((((((.((((((((((..&))))))).....))))))))))).	9052	9076	1	-23.1	1	0.00410238	0.5	-0.546467	-0.31165	-4.99396	18	24	11	3UTR		0	0
hsa-miR-10525-3p	NM_016260	IKZF2	.((((((((((((.(((....&.)))..)))))))))))).	6577	6601	1	-17.7	1	0.000741874	0.632	1.54383	0.97325	-4.65016	15	19	12	3UTR		0	0
hsa-miR-10525-3p	NM_016263	FZR1	((((((((.(((.(((((.(.&.).))))).))))))))))).	1854	1887	1	-23.2	1	2.94297e-05	0.353	2.18124	0.757217	-6.28309	17	21	11	3UTR		0	0
hsa-miR-10525-3p	NM_016341	PLCE1	.(((.(((.((((((((((..&)))))))))).)))))).	11669	11687	1	-20.6	1	0.000672028	0.544	-0.414813	-0.101785	-8.96875	16	18	10	3UTR		0	0
hsa-miR-10525-3p	NM_016377	AKAP7	..((((.((((((((((((..&.)))))))....))))))))).	2623	2647	1	-19.5	1	0.0023307	0.676	0.151929	0.816779	-6.50069	16	22	9	3UTR		0	0
hsa-miR-10525-3p	NM_016418	NF2	.((((((.(((((((((((..&)))))....)))))).)))))).	4676	4699	1	-20.3	1	0.0082251	0.559	0.457736	0.514382	-6.10696	17	23	6	3UTR		0	0
hsa-miR-10525-3p	NM_016441	CRIM1	.(((((((((((((.((....&)).))))))))))))).	5951	5968	1	-19.9	1	0.016514	0.721	2.33668	2.68749	-4.52877	15	17	13	3UTR		0	0
hsa-miR-10525-3p	NM_016448	DTL	.(((((((((.(((((((((.&)))))))))))))).)))).	3174	3194	1	-22.6	1	0.00463184	0.647	0.069531	0.285296	-6.6181	18	20	14	3UTR		0	0
hsa-miR-10525-3p	NM_016511	CLEC1A	(((((((.(((((((.(((((&.)))))))))))).))....))))).	2014	2057	1	-18.9	1	0.00192187	0.544	1.33894	1.71009	-6.48426	19	26	12	3UTR		0	0
hsa-miR-10525-3p	NM_016621	PHF21A	((((((.((((.((((((...&))))))..)))))))))).	5088	5107	1	-19.2	1	0.000964094	0.5	7.64999	6.58728	-8.82806	16	19	10	3UTR		0	0
hsa-miR-10525-3p	NM_016628	WAC	......(((((((((.(((((&)))))))))))))).	3365	3380	1	-17.4	0	0.00736819	0.647	2.08501	3.64782	-15.7996	14	15	14	3UTR		0	0
hsa-miR-10525-3p	NM_016652	CRNKL1	(((.((.(((((((((.....&.))))))))).)).))).	3891	3915	1	-17.4	1	0.00049364	0.691	4.16057	2.29034	-8.51328	14	18	9	3UTR		0	0
hsa-miR-10525-3p	NM_016835	MAPT	...(((((.(.((((((((..&)))))))).)))))).	6004	6020	1	-21.5	1	1.89912e-06	0.426	1.01023	0.586814	-10.3957	14	16	8	3UTR		0	0
hsa-miR-10525-3p	NM_016836	RBMS1	.(((..(((((.((((((((.&)))).)).)))))))..))).	2179	2200	1	-18.6	1	0.0155488	0.588	2.89935	2.82137	-13.1601	16	21	7	3UTR		0	1
hsa-miR-10525-3p	NM_016841	MAPT	...(((((.(.((((((((..&)))))))).)))))).	4786	4802	1	-21.5	1	1.89912e-06	0.426	0.032357	-0.200258	-10.3957	14	16	8	3UTR		0	0
hsa-miR-10525-3p	NM_016848	SHC3	.((((((((((.((((((...&.)))))).)))))))))).	5172	5221	1	-21.6	1	0.030232	0.441	-0.0682406	-0.341778	-7.14013	16	19	10	3UTR		0	0
hsa-miR-10525-3p	NM_016930	STX18	((((((((((.(...(((((.&)))))..).)))))))))).	1486	1506	1	-20.5	1	0.00182339	0.603	1.06816	0.879848	-9.64377	16	20	10	3UTR		0	0
hsa-miR-10525-3p	NM_016944	TAS2R4	(((((((.((((((((((.(.&.).)))))))))).)).))))).	3029	3070	1	-23.3	1	0.00312024	0.559	-0.32541	0.0583253	-6.25121	18	23	10	3UTR		0	0
hsa-miR-10525-3p	NM_017412	FZD3	.(((((((((((((..(((..&)))..))))).)))))))).	6547	6567	1	-18.2	1	0.00329902	0.544	0.0736931	0.116031	-4.76182	16	20	8	3UTR		0	0
hsa-miR-10525-3p	NM_017504	OR2M4	..(((((((.((.((((((((&)))))))).))..))))))).	1930	1951	1	-21.4	1	0.0002983	0.603	0	0	-7.48864	17	21	8	3UTR		0	0
hsa-miR-10525-3p	NM_017504	OR2M4	...(((((.((((((((((((&)))))))).))))))))).	1343	1362	1	-20.8	1	0.000108801	0.662	0	0	-7.57093	17	19	9	3UTR		0	0
hsa-miR-10525-3p	NM_017516	RAB39A	(((((((.((((((((.....&.))))))))))))))).	1063	1110	1	-19	1	0.0593728	0.721	0.0836496	0.327198	-6.25121	15	17	15	3UTR		0	0
hsa-miR-10525-3p	NM_017519	ARID1B	.(((((((((((((.(((((.&)))))))))))))))))).	9141	9160	1	-24.4	1	0.00299024	0.603	0.243416	0.786751	-4.52877	18	19	18	3UTR		0	0
hsa-miR-10525-3p	NM_017527	LY6K	....(((((((((((((((..&))))))))))...))))).	1525	1544	1	-21.8	1	0.00155218	0.515	-0.0938744	-0.167569	-9.54656	15	19	10	3UTR		0	0
hsa-miR-10525-3p	NM_017610	RNF111	(((((((.((.((((.(((((&))))).)))).)).))))))).	3962	3984	1	-23.8	1	0.000374496	0.632	1.12286	1.79827	-9.30903	18	22	7	3UTR		0	0
hsa-miR-10525-3p	NM_017653	DYM	.(((((((.((((((((((..&)))))))))))))).))).	9880	9899	1	-19.8	1	0.0024378	0.735	0.708209	0.622864	-4.84971	17	19	14	3UTR		0	0
hsa-miR-10525-3p	NM_017658	KLHL28	.((((((((((((((((((..&.))))))))).))))))))).	3820	3856	1	-23.1	1	0.0018479	0.676	1.04357	1.37562	-3.79332	18	21	9	3UTR		0	0
hsa-miR-10525-3p	NM_017671	FERMT1	....(((((((((.(((.(((&))).))).))))))))).	4016	4034	1	-17.7	1	0.00608115	0.691	4.69586	3.50554	-10.4034	15	18	9	3UTR		0	0
hsa-miR-10525-3p	NM_017688	BSPRY	.(((((((((((.(((((...&))))).))))))))))).	1814	1832	1	-21	1	0.00790461	0.456	0.0754797	-0.280051	-5.08246	16	18	11	3UTR		0	0
hsa-miR-10525-3p	NM_017750	RETSAT	((((..((((((((((((...&))))))))))))...).))).	2488	2509	1	-19.4	1	0.00574108	0.544	1.39575	1.63779	-9.95757	16	21	12	3UTR		0	0
hsa-miR-10525-3p	NM_017811	UBE2R2	...(((((((((((((((...&.))))))))...))))))).	2702	2738	1	-21.6	1	0.00466229	0.574	0.185645	0.496396	-6.51454	15	20	8	3UTR		0	0
hsa-miR-10525-3p	NM_017811	UBE2R2	..((((.(((((.((((((..&)))))).))))).)))).	3697	3715	1	-20.9	1	0.0001872	0.529	0.5473	0.429249	-7.78982	15	18	6	3UTR		0	0
hsa-miR-10525-3p	NM_017902	HIF1AN	.(((((.(((((((.(((((.&))))))))))))))))).	9056	9074	1	-22.3	1	0.000161929	0.544	-0.0616864	-0.356442	-6.07246	17	18	17	3UTR		0	0
hsa-miR-10525-3p	NM_017921	NPLOC4	...((((((((((((((((..&))))))))))))).))).	4300	4318	1	-23.2	1	1.59224e-05	0.456	0.0923708	0.102438	-6.51454	16	18	13	3UTR		0	0
hsa-miR-10525-3p	NM_017926	GPATCH2L	...((((.((.((((((((..&)))))))).)).)))).	3030	3047	1	-20.6	1	0.124404	0.456	-0.156555	-0.0599016	-11.6529	14	17	8	3UTR		0	0
hsa-miR-10525-3p	NM_017946	FKBP14	.((((((....((((((((((&)))))))))))))))).	3707	3724	1	-19.9	1	0.0104022	0.559	1.01184	0.480574	-11.2306	16	17	16	3UTR		0	0
hsa-miR-10525-3p	NM_017952	PTCD3	((((((((((..(((......&)))..)))))))))).	5063	5079	1	-17.3	1	0.00198273	0.662	-0.0930193	-0.61304	-10.3422	13	16	10	3UTR		0	1
hsa-miR-10525-3p	NM_017972	GPATCH2L	...((((.((.((((((((..&)))))))).)).)))).	2945	2962	1	-20.6	1	0.124404	0.456	-0.156555	-0.0599016	-11.6529	14	17	8	3UTR		0	0
hsa-miR-10525-3p	NM_017982	SUSD4	((((((((.((((((((.(((&))).)))).....)))))))))))).	2386	2412	1	-18.6	1	9.91695e-05	0.603	3.15734	3.26953	-4.99396	19	26	12	3UTR		0	0
hsa-miR-10525-3p	NM_018004	TMEM45A	..(((((((((((((..((((&.))))))))))))))))).	1323	1365	1	-22	1	0.000835194	0.603	0.689308	0.336529	-5.19005	17	19	17	3UTR		0	0
hsa-miR-10525-3p	NM_018017	CCDC186	(((((((....((((((((..&)))))))))))).))).	3942	3959	1	-17.4	1	0.00248351	0.559	0.0183807	0.54392	-11.3749	15	17	12	3UTR		0	0
hsa-miR-10525-3p	NM_018036	ATG2B	(((....(((((((((((.((&)).)))))))))))....))).	11165	11187	1	-20.9	0	0.000406749	0.574	2.63782	2.72876	-14.5333	16	22	11	3UTR		0	0
hsa-miR-10525-3p	NM_018077	RBM28	.(((((((((((((((.....&.))).)))))))))))).	8885	8910	1	-18.7	1	0.0183359	0.647	0.208797	0.126575	-3.79332	15	18	12	3UTR		0	0
hsa-miR-10525-3p	NM_018087	NDC1	.((((((((.((..(((((..&)))))..)).)))))))).	2423	2442	1	-18.2	1	0.00184418	0.691	1.70121	2.39816	-7.1818	15	19	8	3UTR		0	0
hsa-miR-10525-3p	NM_018112	TMEM38B	.((((((((.((((.(((...&.)))))))...)))))))).	2485	2505	1	-20.6	1	0.000450957	0.676	0.985331	0.39926	-5.77128	15	20	8	3UTR		0	0
hsa-miR-10525-3p	NM_018126	TMEM33	.(((((((.((((((((((..&.)))))))))).)).........))))).	2705	2746	1	-21.8	1	0.00229216	0.544	0.18488	-0.278634	-4.84971	17	29	10	3UTR		0	0
hsa-miR-10525-3p	NM_018179	ATF7IP	.(((((((.((((((((((..&.))))))))))))))))).	5088	5119	1	-26.5	1	0.0293184	0.5	0.0249705	-0.132017	-4.84971	17	19	17	3UTR		0	0
hsa-miR-10525-3p	NM_018206	VPS35	.(((((((((((((....((.&))....))))))))))))).	4168	4188	1	-17.9	1	0.00155624	0.603	2.17275	1.77079	-4.76182	15	20	13	3UTR		0	0
hsa-miR-10525-3p	NM_018263	ASXL2	((.((((((((((.((((...&.))))..)))))))))))).	8060	8103	1	-19.7	1	0.00723446	0.559	1.74488	3.31029	-6.35195	16	20	12	3UTR		0	0
hsa-miR-10525-3p	NM_018425	PI4K2A	((((.((((.(((.(((((..&)))))))).)))))))).	1890	1908	1	-17.1	1	0.0053347	0.574	0.55926	0.804363	-10.156	16	18	8	3UTR		0	0
hsa-miR-10525-3p	NM_018538	ERMAP	...((.((((((((.((((..&)))).)))))))).)).	2306	2323	1	-20.3	1	0.00118349	0.5	0.0395482	-0.0369577	-9.15095	14	17	8	3UTR		0	0
hsa-miR-10525-3p	NM_018713	SLC30A10	...(((((((.(.(((((((.&)))))))).))))))).	1947	1964	1	-20.7	1	0.00345808	0.676	-0.318175	-0.212209	-10.6284	15	17	8	3UTR		0	0
hsa-miR-10525-3p	NM_018839	NSFL1C	...(((((((.(.((((((..&)))))).).))))))).	2541	2558	1	-19.6	1	0.00282265	0.544	2.85726	3.42466	-10.6284	14	17	7	3UTR		0	0
hsa-miR-10525-3p	NM_018933	PCDHB13	((((((((((.((((((....&))))))))))))).))).	4578	4596	1	-20.3	1	0.00154671	0.456	0.0324422	-0.011653	-6.76235	16	18	13	3UTR		0	0
hsa-miR-10525-3p	NM_018979	WNK1	((((((((((((..(((((((&.)))))))..)))))).)))))).	9213	9262	1	-20.9	1	0.0175799	0.574	1.27269	0.834681	-6.08354	19	24	7	3UTR		0	0
hsa-miR-10525-3p	NM_018981	DNAJC10	((((((((((((((((((...&.)))))))))))).....)))))).	12926	12979	1	-26.8	1	0.00636112	0.5	-0.305257	-0.0735114	-3.93757	18	25	12	3UTR		0	0
hsa-miR-10525-3p	NM_018999	CCSER2	.(((((.((.((((((((.(.&).)))))))))).))))).	7043	7062	1	-20.6	1	0.000220531	0.559	-0.386563	-0.00106666	-6.57952	16	19	10	3UTR		0	0
hsa-miR-10525-3p	NM_019005	MIOS	(((((((((.(.(((((((..&))))))).).)))))).))).	3082	3103	1	-19.6	1	0.00662727	0.574	1.59131	1.26899	-8.52688	17	21	7	3UTR		0	0
hsa-miR-10525-3p	NM_019008	MIEF1	(((((.(((((.((((.....&))))))))).))))).	4803	4819	1	-16.6	1	0.000633307	0.632	0	0	-9.18534	14	16	9	3UTR		0	0
hsa-miR-10525-3p	NM_019099	INKA2	(((((((((.((((.(((.(.&).))).)))).))))))))).	4381	4402	1	-19.7	1	0.00498716	0.544	-0.419348	-0.318952	-5.91553	17	21	9	3UTR		0	0
hsa-miR-10525-3p	NM_019107	MYDGF	.(((((((((((((.(((...&.)))...)))))))).))))).	588	619	1	-18.3	1	0.00884295	0.485	1.37758	2.55137	-4.52877	16	22	8	3UTR		0	0
hsa-miR-10525-3p	NM_019604	CRTAM	.(((((((.((((((((....&.)))))))).).)))))).	1814	1848	1	-21.1	1	5.79388e-05	0.471	-0.104201	-0.27695	-4.84971	15	19	8	3UTR		0	0
hsa-miR-10525-3p	NM_019605	SERTAD4	.(((((((((((((.......&))))))))))))).	1539	1553	1	-17.1	1	0.00733241	0.706	1.26034	1.11973	-4.76182	13	14	13	3UTR		0	0
hsa-miR-10525-3p	NM_020205	OTUD7B	...((.(.(((((((((((..&))))))))))).))).	4454	4470	1	-17.1	1	0.000999044	0.574	0.509817	1.09247	-10.7291	14	16	11	3UTR		0	0
hsa-miR-10525-3p	NM_020228	PRDM10	(((((((((((((((((((((&))))))).....)))))).))).....))))).	5776	5809	1	-20.7	1	0.0279332	0.647	3.40849	3.91694	-3.93757	21	33	7	3UTR		0	0
hsa-miR-10525-3p	NM_020340	ARFGEF3	(((((.(((((((((((((..&))))))).....))))))))))).	11542	11566	1	-23.1	1	0.0113397	0.529	1.12397	-0.0273862	-5.83853	18	24	11	3UTR		0	0
hsa-miR-10525-3p	NM_020340	ARFGEF3	...((((.(((((((((((..&)))))))).))).)))).	14097	14115	1	-19.4	1	0.00857664	0.515	0.594875	0.27584	-8.82818	15	18	8	3UTR		0	0
hsa-miR-10525-3p	NM_020348	CNNM1	((.((..((..((((((((..&))))))))..))..)))).	3990	4009	1	-17.4	1	0.000530822	0.485	0.565756	0.388744	-13.007	14	19	8	3UTR		0	0
hsa-miR-10525-3p	NM_020365	EIF2B3	(((((((((((((((((((..&.))))))))))..........))))).)))).	1616	1660	1	-22.8	1	0.000715937	0.529	5.05342	4.11107	-3.93757	19	32	10	3UTR		0	0
hsa-miR-10525-3p	NM_020405	PLXDC1	.(((((((..((((((((.((&)).)))))))).))))))).	3987	4007	1	-21.8	1	1.26417e-05	0.426	0.0826929	0.0781658	-6.09222	17	20	8	3UTR		0	0
hsa-miR-10525-3p	NM_020416	PPP2R2C	((((((((.((.((.((((..&.)))).)).)))))))))).	4166	4188	1	-19.9	1	0.00119749	0.574	1.18005	1.5891	-9.07622	16	20	10	3UTR		0	1
hsa-miR-10525-3p	NM_020433	JPH2	(((((((((.((((.((((..&)))))))).))))).)))).	7353	7373	1	-22.4	1	0.00041323	0.485	0.928946	1.0975	-5.91553	17	20	8	3UTR		0	0
hsa-miR-10525-3p	NM_020463	PPP4R3B	..(((((.((((((((((...&.))))))))))))))).	4408	4440	1	-19.9	1	0.00679575	0.632	4.97202	5.07557	-7.27064	15	17	15	3UTR		0	0
hsa-miR-10525-3p	NM_020469	ABO	(((((.((..((((.((((..&))))))))..)).))))).	5948	5967	1	-18.5	1	0.00590976	0.471	0.691732	0.392531	-8.87288	15	19	8	3UTR		0	0
hsa-miR-10525-3p	NM_020473	PIGA	...(((((..((((((((...&.))))))))..))))).	2034	2071	1	-19.9	1	0.000670756	0.618	0	0	-8.81344	13	17	8	3UTR		0	0
hsa-miR-10525-3p	NM_020478	ANK1	.(((((((((((((.......&))))...))))))))).	1721	1738	1	-17.1	1	0.00728615	0.647	0.824613	1.12695	-4.76182	13	17	9	3UTR		0	1
hsa-miR-10525-3p	NM_020480	ANK1	.(((((((((((((.......&))))...))))))))).	1520	1537	1	-17.1	1	0.00728615	0.647	3.27096	2.60429	-4.76182	13	17	9	3UTR		0	1
hsa-miR-10525-3p	NM_020546	ADCY2	.((..(((((((((((((...&)))))))))))))..)).	3744	3762	1	-17.5	1	0.00112299	0.647	2.37291	2.02638	-10.9444	15	18	13	3UTR		0	0
hsa-miR-10525-3p	NM_020649	CBX8	(.((.(((((((((((.((((&)))).))))))))))))).).	2001	2022	1	-16.5	1	0.0015835	0.515	1.39781	0.659734	-9.22029	18	21	13	3UTR		0	0
hsa-miR-10525-3p	NM_020654	SENP7	....(((((((((.(((((..&)))))))))))))).	3641	3656	1	-20	1	0.0155874	0.603	0.13843	0.462195	-10.4034	14	15	14	3UTR		0	0
hsa-miR-10525-3p	NM_020698	TMCC3	.....((((((.(((((((..&))))))))))))).	5795	5809	1	-18.3	1	0.000471796	0.676	0.488456	0.223544	-17.0124	13	14	13	3UTR		0	0
hsa-miR-10525-3p	NM_020699	GATAD2B	(((((...((((.((((((((&.)))))))).)))).....))))).	3067	3100	1	-20.4	1	0.00282088	0.529	1.63021	1.73296	-10.985	17	25	8	3UTR		0	0
hsa-miR-10525-3p	NM_020730	DLG3	((.((.(((((((((((((..&)))))))).....))))).)).)).	2135	2160	1	-19.4	1	0.182597	0.559	2.44982	3.6836	-7.39607	17	25	8	3UTR		0	0
hsa-miR-10525-3p	NM_020733	HEG1	(((((((...((((((((...&.))))))))....))))))).	5948	5982	1	-20	1	0.0162528	0.618	3.68266	2.61333	-8.55011	15	21	8	3UTR		0	0
hsa-miR-10525-3p	NM_020741	CFAP92	(((((((((((..((((....&))))..))))))))))).	1788	1806	1	-18.2	1	0.000245463	0.574	0.615318	-0.0445159	-8.57351	15	18	11	3UTR		0	0
hsa-miR-10525-3p	NM_020742	NLGN4X	...((((((((((((((((..&))))))).....))))))))).	3236	3258	1	-20.4	1	1.72457e-05	0.485	2.71661	3.36036	-6.51454	16	22	9	3UTR		0	0
hsa-miR-10525-3p	NM_020746	MAVS	(((((((..((((((((((..&))).)))))))))))))).	2741	2760	1	-22.5	1	0.00539487	0.397	0.207294	-0.0195449	-7.3076	17	19	14	3UTR		0	0
hsa-miR-10525-3p	NM_020750	XPO5	.((((((((((((((((((..&.))))))).....)))...)))))))).	4670	4700	1	-22.7	1	0.0169428	0.529	4.85856	4.41838	-3.79332	18	28	8	3UTR		0	0
hsa-miR-10525-3p	NM_020752	GPR158	.((((((((((((........&.)))))))))))).	4849	4869	1	-16.1	1	0.0402743	0.721	1.27318	1.8755	-5.61866	12	14	12	3UTR		0	0
hsa-miR-10525-3p	NM_020768	KCTD16	......(((((((((((((..&)))))))).))))).	13277	13292	1	-18.8	0	3.8895e-05	0.691	1.52601	1.58296	-15.5666	13	15	8	3UTR		0	0
hsa-miR-10525-3p	NM_020772	NUFIP2	...((.((((..((((((((.&))))))))..)))).)).	7570	7588	1	-20.9	1	0.000369502	0.603	1.68717	2.36905	-14.5871	14	18	8	3UTR		0	0
hsa-miR-10525-3p	NM_020772	NUFIP2	.(((((((((((((.((((((&))))))))))...........))))))))).	3647	3678	1	-19.8	1	0.000921926	0.632	0.0360236	-0.021248	-4.52877	19	31	10	3UTR		0	0
hsa-miR-10525-3p	NM_020791	TAOK1	.(((((((.(((.((((((..&))))))))).))))))).	9813	9831	1	-18.4	1	0.00441675	0.691	2.09147	2.05005	-6.13885	16	18	9	3UTR		0	1
hsa-miR-10525-3p	NM_020829	RIC1	.(((((((....((((((...&))))))....))))))).	4871	4889	1	-18.1	1	0.00103637	0.618	0.573454	0.248684	-12.2638	13	18	7	3UTR		0	0
hsa-miR-10525-3p	NM_020858	SEMA6D	.(((((((((.((((((....&))))))))))))..))).	5049	5067	1	-17.5	1	0.00184337	0.632	2.50284	2.38995	-6.6181	15	18	12	3UTR		0	0
hsa-miR-10525-3p	NM_020880	ZNF530	.((.(((((((((((((....&)))))))))).))).)).	3891	3909	1	-19.6	1	0.0447594	0.5	-0.295666	-0.0501969	-6.82535	15	18	10	3UTR		0	0
hsa-miR-10525-3p	NM_020909	EPB41L5	((((((((((.(...((((..&))))).)))))))))).	5062	5079	1	-18.4	1	0.00419346	0.559	-0.479364	-0.157203	-9.64377	15	17	10	3UTR		0	0
hsa-miR-10525-3p	NM_020993	BCL7A	..(((..((((((((((....&))))))))))..))).	2425	2441	1	-17.5	1	0.000374229	0.544	2.11248	0.504403	-8.40165	13	16	10	3UTR		0	0
hsa-miR-10525-3p	NM_021007	SCN2A	(((((.((((((.(((((((.&))))))).)))))).))))).	7766	7787	1	-25.5	1	0.000316629	0.647	3.66769	3.60734	-7.12766	18	21	7	3UTR		0	0
hsa-miR-10525-3p	NM_021038	MBNL1	(((((((.(.(((.(((((..&))))))))).))))))).	3565	3583	1	-18	1	0.00284615	0.574	3.10941	2.81166	-8.35056	16	18	9	3UTR		0	0
hsa-miR-10525-3p	NM_021061	ZNF250	(((((((((((.(((((....&.))))))))))))).))).	3756	3795	1	-22.4	1	1.73694e-05	0.397	-0.0489317	0.0446849	-7.28438	16	19	13	3UTR		0	0
hsa-miR-10525-3p	NM_021083	XK	(((..(((((((((((((((.&)))))))))))........))))..))).	2399	2428	1	-18.9	1	0.0118303	0.647	0.382595	0.268155	-11.0886	18	29	11	3UTR		0	0
hsa-miR-10525-3p	NM_021089	ZNF8	(.((((.(((((((.((((..&))))))))))))))).).	3039	3057	1	-19	1	0.00222871	0.5	0.211374	0.0699621	-7.38039	16	18	15	3UTR		0	0
hsa-miR-10525-3p	NM_021090	MTMR3	(.((((((((.(((.((((..&))))))).)))))))).).	5341	5360	1	-19.9	1	0.00922659	0.5	0.162969	0.615956	-8.66147	16	19	8	3UTR		0	0
hsa-miR-10525-3p	NM_021120	DLG3	((.((.(((((((((((((..&)))))))).....))))).)).)).	3087	3112	1	-19.4	1	0.182597	0.559	2.44982	3.6836	-7.39607	17	25	8	3UTR		0	0
hsa-miR-10525-3p	NM_021127	PMAIP1	...((((((.((((((((...&)))))))))))))).	453	468	1	-19.8	1	1.21132e-05	0.559	-0.280049	0.0820344	-7.75705	14	15	14	3UTR		0	0
hsa-miR-10525-3p	NM_021127	PMAIP1	(((....(((((((((((...&)))))))))))...))).	397	415	1	-18.9	0	0.010396	0.632	-0.353017	0.0615221	-14.5333	14	18	11	3UTR		0	0
hsa-miR-10525-3p	NM_021137	TNFAIP1	(((((((((((((........&.))))))))))))).	1980	2009	1	-19.8	1	0.0796704	0.515	-0.167838	0.00337991	-5.76291	13	15	13	3UTR		0	1
hsa-miR-10525-3p	NM_021145	DMTF1	((((((.((((((((((....&)))).)))))))))))).	3461	3479	1	-15.8	1	0.0310651	0.5	0.951381	0.770732	-5.48126	16	18	12	3UTR		0	0
hsa-miR-10525-3p	NM_021159	RAP1GDS1	.(((((((((((((((.....&.))))))))))))))).	2244	2280	1	-20.2	1	0.000732783	0.647	2.29281	2.2623	-3.79332	15	17	15	3UTR		0	0
hsa-miR-10525-3p	NM_021191	NEUROD4	...(((((((((((.((((..&)))))))))))).))).	2942	2959	1	-19.7	1	0.012672	0.691	0.253901	0.298001	-7.24999	15	17	12	3UTR		0	0
hsa-miR-10525-3p	NM_021623	PLEKHA2	.(((((((((..(((((....&))))).))))))))).	3862	3878	1	-18.2	1	0.000506841	0.559	-0.491259	-0.103462	-9.9649	14	16	9	3UTR		0	0
hsa-miR-10525-3p	NM_021629	GNB4	(((((((((((((((......&))))))...))))))))).	6082	6101	1	-16.9	1	0.000131636	0.632	5.01067	4.5959	-4.17062	15	19	9	3UTR		0	0
hsa-miR-10525-3p	NM_021637	TMEM35A	.((((((.(.(((((((((((&)))))))))))..).)))))).	1859	1881	1	-20	1	0.0128978	0.618	1.94167	1.36191	-7.34947	18	22	11	3UTR		0	0
hsa-miR-10525-3p	NM_021928	SPCS3	(((((.....(.((((((((.&))))))))).....))))).	1002	1022	1	-20.2	1	0.000791434	0.647	0.845588	0.638723	-15.3416	14	20	9	3UTR		0	0
hsa-miR-10525-3p	NM_021974	POLR2F	(((((.(((((((((((((..&.))))))).))))))))))).	1260	1294	1	-22.8	1	0.00242271	0.441	-0.0995039	-0.12632	-5.83853	18	21	11	3UTR		0	0
hsa-miR-10525-3p	NM_022080	NAPB	.((((((...(((((((((..&.))))))))).)))))).	2596	2627	1	-23.7	1	1.09754e-05	0.456	0.394601	0.206937	-8.40586	15	18	9	3UTR		0	0
hsa-miR-10525-3p	NM_022111	CLSPN	((((((((((((((..(((..&)))..))))).)))))).))).	6680	6702	1	-19.5	1	0.00290032	0.485	2.48536	2.24324	-4.90607	17	22	6	3UTR		0	0
hsa-miR-10525-3p	NM_022572	PNKD	(((((..((.(((((((((..&.))))))))).)).))))).	2403	2431	1	-21.3	1	0.00550499	0.426	-0.428186	0.291521	-8.62473	16	20	9	3UTR		0	0
hsa-miR-10525-3p	NM_022774	EXO5	...((((((((.(((.(((..&))).))).)))))))).	1546	1563	1	-18.6	1	0.0014738	0.588	-0.0597776	0.300815	-10.0944	14	17	8	3UTR		0	0
hsa-miR-10525-3p	NM_024045	DDX50	.((((((((((...(((((((&))))))))))))))))).	2354	2372	1	-18.7	1	0.00294473	0.647	1.4638	2.0923	-9.2861	17	18	17	3UTR		0	0
hsa-miR-10525-3p	NM_024331	TTPAL	(((((((((.((((.((((((&)))))).........)))).))))))))).	1762	1792	1	-20.3	1	0.00337865	0.529	-0.0324097	0.250734	-5.91553	19	30	9	3UTR		0	0
hsa-miR-10525-3p	NM_024331	TTPAL	((.(((((.((((((((((..&))))))))))..))))).)).	1989	2010	1	-19.7	1	0.0373951	0.544	-0.0687729	0.194309	-6.5515	17	21	10	3UTR		0	0
hsa-miR-10525-3p	NM_024341	ZNF557	......(((((.(((((((..&))))))).))))).	4292	4306	1	-19.4	0	0.00045634	0.5	0.146795	-0.106417	-18.9134	12	14	7	3UTR		0	0
hsa-miR-10525-3p	NM_024513	FYCO1	.((..((((((.(((((((((&))))))))).)).))))..)).	6445	6467	1	-20.5	1	0.1539	0.5	1.878	1.16741	-14.2912	17	22	9	3UTR		0	0
hsa-miR-10525-3p	NM_024533	CHST5	...((((((.(((((((((((&)))))))))))...)))))).	3143	3164	1	-25.2	1	0.000173399	0.471	0.0683871	0.146772	-7.75705	17	21	11	3UTR		0	0
hsa-miR-10525-3p	NM_024544	MUL1	.(((.((((.(((((((.(((&)))..)))))))))))))).	2136	2156	1	-19	1	0.000791015	0.471	1.74236	3.08782	-9.15487	17	20	14	3UTR		0	0
hsa-miR-10525-3p	NM_024576	OGFRL1	(((((((((((.(((......&))).))))))))))).	5077	5093	1	-17.1	1	0.0115593	0.721	-0.0486122	0.392594	-7.51743	14	16	11	3UTR		0	1
hsa-miR-10525-3p	NM_024584	CCDC121	((((((.((.(((((((((..&.))))))))).)).)))).)).	1867	1908	1	-21.5	1	0.000878474	0.691	0.143414	0.187332	-6.72377	17	22	9	3UTR		0	0
hsa-miR-10525-3p	NM_024612	DHX40	(((((((.(((((((......&.))))))).))))))).	3506	3530	1	-18.7	1	0.0014637	0.632	1.88499	1.93022	-6.48426	14	17	7	3UTR		0	1
hsa-miR-10525-3p	NM_024659	GTDC1	.(((((((((.(((.((((..&)))).))).))))))))).	5980	5999	1	-21.7	1	0.00032373	0.485	0.167663	-0.026488	-7.35355	16	19	9	3UTR		0	0
hsa-miR-10525-3p	NM_024734	CLMN	......((((.((((((((((&)))))))))).)))).	9954	9970	1	-20.1	0	0.00265637	0.412	1.04228	1.1743	-18.3913	14	16	10	3UTR		0	0
hsa-miR-10525-3p	NM_024734	CLMN	(((((..(((((((.......&)))))))..))))).	4765	4780	1	-19.1	1	0.00372909	0.544	0.0449856	0.0397412	-8.35072	12	15	7	3UTR		0	0
hsa-miR-10525-3p	NM_024740	ALG9	((((((.((.((((.(((...&))))))).)))))))).	2936	2953	1	-19	1	0.000528118	0.588	-0.307636	-0.0189117	-7.45922	15	17	8	3UTR		0	0
hsa-miR-10525-3p	NM_024754	PTCD2	.(((....(((.((((((((.&)))))))))))....))).	4729	4748	1	-20.3	1	0.0134798	0.5	0.0467172	-0.128844	-17.0174	14	19	11	3UTR		0	0
hsa-miR-10525-3p	NM_024805	RBFA	...(((((((((((.......&))))))))))).	5372	5384	1	-18.3	1	0.00837069	0.544	-0.15115	0.0786532	-7.48304	11	12	11	3UTR		0	0
hsa-miR-10525-3p	NM_024884	L2HGDH	(((.(((((((((((((((..&))))))))...))))))).))).	2664	2687	1	-22.6	1	2.52127e-05	0.515	1.99307	0.770545	-6.9696	18	23	8	3UTR		0	0
hsa-miR-10525-3p	NM_024884	L2HGDH	.((((.((((((((((.....&)))))))))).)))).	5345	5361	1	-18.1	1	0.020547	0.632	2.81485	2.7737	-5.69428	14	16	10	3UTR		0	0
hsa-miR-10525-3p	NM_024906	SCD5	(((.((((.((((((((((((&)))))))))))))))).))).	1758	1779	1	-20	1	0.000909125	0.588	0.597587	0.157574	-8.02599	19	21	16	3UTR		0	0
hsa-miR-10525-3p	NM_024921	POF1B	((((((((.....((((((..&))))))..)))))))).	3768	3785	1	-17.6	1	0.0126529	0.676	1.2921	1.22463	-13.6972	14	17	8	3UTR		0	0
hsa-miR-10525-3p	NM_024926	TTC26	.((((((((.(((((.(((((&.))))))))))...)))))))).	4151	4184	1	-19.2	1	0.0170712	0.676	0.227361	0.347426	-5.26888	18	23	10	3UTR		0	0
hsa-miR-10525-3p	NM_024989	PGAP1	.((((((((((.(((((((..&)))))))..))))...)))))).	8721	8744	1	-18	1	0.0101368	0.662	2.66548	1.96233	-7.14013	17	23	7	3UTR		0	0
hsa-miR-10525-3p	NM_025069	ZNF703	.(((((((((((((.......&))))))))))))).	2933	2947	1	-17.7	1	0.00601152	0.485	1.29174	0.291334	-4.76182	13	14	13	3UTR		0	0
hsa-miR-10525-3p	NM_025142	TAOK1	.(((((((.(((.((((((..&))))))))).))))))).	8807	8825	1	-18.4	1	0.00441675	0.691	2.09147	2.05005	-6.13885	16	18	9	3UTR		0	1
hsa-miR-10525-3p	NM_025144	ALPK1	...(((((.(((.((((((..&)))))).)))))))).	5198	5214	1	-18.7	1	0.0361562	0.515	-0.201705	0.108391	-8.86006	14	16	8	3UTR		0	0
hsa-miR-10525-3p	NM_025160	WDR26	((((((((((.((((......&)).)).)))))))))).	4455	4472	1	-16.8	1	0.00112857	0.618	3.64786	4.75048	-6.9954	14	17	10	3UTR		0	1
hsa-miR-10525-3p	NM_025205	MED28	......((.((((((((((((&)))))))))))).)).	3849	3865	1	-21.8	0	0.00133875	0.544	-0.316013	0.0147285	-16.6229	14	16	12	3UTR		0	0
hsa-miR-10525-3p	NM_025212	CXXC4	(((((((((((((.(((((..&)).))).)))).))))))))).	3475	3497	1	-18.9	1	0.00393962	0.618	4.66133	2.66816	-4.79441	18	22	9	3UTR		0	0
hsa-miR-10525-3p	NM_002249	KCNN3	((((.((((.((.((((((..&)))))).))..)))))))).	5325	5345	1	-19.3	1	0.00640229	0.574	2.8894	0.905465	-10.5882	16	20	8	3UTR		0	0
hsa-miR-10525-3p	NM_002262	KLRD1	(((.((((((((((((((((.&)))))))))...))))))).))).	2495	2519	1	-24	1	9.65872e-05	0.574	-0.150201	0.0261803	-6.9696	19	24	9	3UTR		0	0
hsa-miR-10525-3p	NM_002262	KLRD1	.(((((...(((((.((((((&)))))))))))...))))).	12367	12387	1	-20.8	1	0.0019349	0.544	0.0863358	0.0917567	-9.44249	16	20	11	3UTR		0	0
hsa-miR-10525-3p	NM_002267	KPNA3	.....((((((((((((((..&))))))))))).))).	3331	3347	1	-18.5	1	0.000435149	0.618	6.9581	6.23863	-13.6656	14	16	11	3UTR		0	0
hsa-miR-10525-3p	NM_002317	LOX	((((((((.(((((((((...&.))))))))).)))))))).	3015	3065	1	-23.7	1	0.0023145	0.515	0.966724	1.64341	-4.99396	17	20	9	3UTR		0	0
hsa-miR-10525-3p	NM_002337	LRPAP1	((((((((((.((((((....&))))))))))))).))).	6874	6892	1	-20	1	0.000641082	0.426	-0.273692	0.00577491	-6.76235	16	18	13	3UTR		0	0
hsa-miR-10525-3p	NM_002375	MAP4	((((((((....((.((((..&))))))..)))))))).	5488	5505	1	-17.2	1	0.00702678	0.426	1.03126	1.36466	-13.1435	14	17	8	3UTR		0	0
hsa-miR-10525-3p	NM_002393	MDM4	.(((..((.((((((((((..&)))))))))).))....))).	4945	4966	1	-19	1	0.00133005	0.559	-0.099211	-0.201793	-10.8697	15	21	10	3UTR		0	0
hsa-miR-10525-3p	NM_002446	MAP3K10	...(((((((((.(.(((((.&)))))....).))))))))).	3688	3709	1	-19.5	1	0.00351819	0.456	0.949547	1.39799	-8.53912	15	21	9	3UTR		0	0
hsa-miR-10525-3p	NM_002451	MTAP	...(((((((((.((((....&)))).))))))))).	3383	3398	1	-19.7	1	0.000322178	0.559	0.0929204	0.0374708	-7.80367	13	15	9	3UTR		0	0
hsa-miR-10525-3p	NM_002490	NDUFA6	(((......(((((((((((.&))))))))))).....))).	958	978	1	-19	0	0.00799338	0.559	0	0	-17.9033	14	20	11	3UTR		0	0
hsa-miR-10525-3p	NM_002495	NDUFS4	.((((((((..((((((((((&)))))..)))))....)))))))).	590	615	1	-19.6	1	0.00238345	0.676	4.09156	2.86606	-7.86061	18	25	8	3UTR		0	0
hsa-miR-10525-3p	NM_002513	NME3	...((.(((((((((.(((..&))).))))))))).)).	690	707	1	-18	1	0.00957085	0.368	2.24139	3.01024	-8.64855	14	17	9	3UTR		0	0
hsa-miR-10525-3p	NM_002564	P2RY2	.((((..(((.((((((((((&)))))))))))))..)))).	2349	2369	1	-22.5	1	0.000420895	0.485	0.0578322	0.158128	-10.0627	17	20	13	3UTR		0	0
hsa-miR-10525-3p	NM_002569	FURIN	((.(((((.((((((((((..&))))))))))))))))).	3199	3217	1	-21.7	1	0.000113733	0.353	-0.325172	-0.239682	-6.5515	17	18	17	3UTR		0	0
hsa-miR-10525-3p	NM_002610	PDK1	(((((.((((((..(((((..&.))))).)))))).))))).	9121	9156	1	-21.4	1	0.0268063	0.544	-0.430126	0.0874995	-7.9845	16	20	6	3UTR		0	0
hsa-miR-10525-3p	NM_002655	PLAG1	((((..((..((((.(((((.&)))))))))))..)))).	4608	4626	1	-17.2	1	0.0124421	0.618	1.54993	0.765986	-12.9919	15	18	11	3UTR		0	0
hsa-miR-10525-3p	NM_002657	PLAGL2	((((...(((((((.((((..&)))))))))))...)))).	5547	5566	1	-19.4	1	0.0136296	0.706	1.75385	1.32051	-12.2367	15	19	11	3UTR		0	0
hsa-miR-10525-3p	NM_002660	PLCG1	((.((((((.(.((((((...&))))))))))))))).	5051	5067	1	-17.8	1	8.47883e-05	0.412	0.618588	0.553879	-10.0844	15	16	15	3UTR		0	0
hsa-miR-10525-3p	NM_002718	PPP2R3A	.(((((((((((((((((.((&.)).).)))))))))).)))))).	6047	6096	1	-24.5	1	0.000268126	0.5	-0.00886439	0.0195342	-3.79332	19	24	10	3UTR		0	0
hsa-miR-10525-3p	NM_002736	PRKAR2B	..((((((.(((((.((((..&))))))))).)))))).	3497	3514	1	-20.1	1	0.00546326	0.529	-0.232236	-0.167955	-6.74884	15	17	9	3UTR		0	0
hsa-miR-10525-3p	NM_002738	PRKCB	((.(((..((((((((((((.&))).)))))))))..))))).	7591	7612	1	-21.2	1	0.00012524	0.529	1.5625	1.35479	-9.35244	17	21	9	3UTR		0	0
hsa-miR-10525-3p	NM_002755	MAP2K1	((((.((((((((((((((((&)))))...))))))))))))))).	2099	2123	1	-21.6	1	0.0466139	0.721	1.28557	1.87533	-8.05661	20	24	15	3UTR		0	0
hsa-miR-10525-3p	NM_002764	PRPS1	..(((((((((..(((((((.&))))))).))))))))).	1908	1926	1	-19.7	1	0.000233341	0.647	0.117879	0.941556	-9.59293	16	18	9	3UTR		0	0
hsa-miR-10525-3p	NM_002766	PRPSAP1	(((((((.((.(((((..(((&)))..))))).)).))))))).	3219	3241	1	-19.1	1	0.000799494	0.618	0.518108	0.928991	-9.07598	17	22	7	3UTR		0	0
hsa-miR-10525-3p	NM_002802	PSMC1	..(((((((((((((..((((&))))..)))))))))).))).	3939	3960	1	-19.9	1	0.0636872	0.515	0.0301013	0.00828588	-5.19005	17	21	10	3UTR		0	0
hsa-miR-10525-3p	NM_002837	PTPRB	.....((((((((.((((((.&))))))..)))))))).	9216	9233	1	-18.2	1	0.0278564	0.691	4.85921	3.01999	-14.5224	14	17	8	3UTR		0	0
hsa-miR-10525-3p	NM_002843	PTPRJ	(((((.(..((((.(((((..&)))))))))..).))))).	6883	6902	1	-17.6	1	0.0111986	0.456	1.20812	0.210298	-10.0654	15	19	9	3UTR		0	0
hsa-miR-10525-3p	NM_002869	RAB6A	..((((((.((((((((((((&)))))))...))))))))))).	2252	2274	1	-20.6	1	0.140851	0.588	2.83114	3.00644	-6.01339	18	22	11	3UTR		0	0
hsa-miR-10525-3p	NM_002886	RAP2B	(((((.(((((((((......&)))))))))))))).	2903	2918	1	-19.6	1	0.0310744	0.676	-0.311724	-0.186545	-6.07158	14	15	14	3UTR		0	0
hsa-miR-10525-3p	NM_002892	ARID4A	((.(((((((((((((((((.&)))))))).)))....)))))).)).	4286	4312	1	-19.8	1	0.0688315	0.691	2.21246	2.38107	-5.49511	19	26	8	3UTR		0	0
hsa-miR-10525-3p	NM_003034	ST8SIA1	...(((((((((((.((((..&.))))))))))))))).	8950	8979	1	-21.3	1	0.00189	0.603	4.87282	3.81947	-7.24999	15	17	15	3UTR		0	0
hsa-miR-10525-3p	NM_003038	SLC1A4	((((.(((.((((((((((..&))))))).)))))).)))).	2405	2425	1	-21.8	1	0.00697608	0.471	-0.595433	0.0657015	-9.113	17	20	7	3UTR		0	0
hsa-miR-10525-3p	NM_003144	SSR1	.(((((((((((((((..(((&))).))))))))).)))))).	8271	8292	1	-20.6	1	0.068925	0.5	0.21204	0.367294	-3.79332	18	21	9	3UTR		0	0
hsa-miR-10525-3p	NM_003156	STIM1	.(((((.((((((((.((((.&.)))))))))))).))))).	2898	2934	1	-20.1	1	0.00121359	0.441	0.224976	1.19232	-5.57006	17	20	12	3UTR		0	0
hsa-miR-10525-3p	NM_003161	RPS6KB1	((((..((((((((((.((((&)))).))).)))))))..)))).	4104	4127	1	-20.5	1	0.000251617	0.603	2.67898	3.23364	-9.95757	18	23	7	3UTR		0	0
hsa-miR-10525-3p	NM_003178	SYN2	..((((.((((((((((((((&))))).))))))))))))).	3481	3501	1	-22.5	1	0.000954685	0.603	1.99692	1.52706	-6.50069	18	20	13	3UTR		0	0
hsa-miR-10525-3p	NM_003198	ELOA	.(((.....((.(((((((((&)))))))))))...))).	4208	4226	1	-19.2	1	0.000270413	0.559	0.292343	0.186892	-18.0738	14	18	11	3UTR		0	0
hsa-miR-10525-3p	NM_003215	TEC	...(((((.(((((((((...&.)))))))))))))).	2314	2343	1	-22	1	0.000382052	0.426	5.13749	4.46234	-7.57093	14	16	14	3UTR		0	0
hsa-miR-10525-3p	NM_003285	TNR	......(((((((((((((..&))))))))))).)).	12185	12200	1	-20.5	0	0.00012685	0.544	2.00135	1.93762	-15.5666	13	15	11	3UTR		0	0
hsa-miR-10525-3p	NM_003285	TNR	.(((((((((((((.((((((&))))))))))..........))))))))).	5838	5868	1	-19.6	1	0.0162646	0.544	-0.389747	-0.247278	-4.52877	19	30	10	3UTR		0	0
hsa-miR-10525-3p	NM_003340	UBE2D3	.(((.......((((((((..&))))))))......))).	2088	2106	1	-17.6	1	0.00173467	0.618	3.91258	3.36396	-18.7943	11	18	8	3UTR		0	0
hsa-miR-10525-3p	NM_003403	YY1	...(((((.(((.((((((((&))))))))..)))))))).	3064	3083	1	-19.2	1	0.00505233	0.485	0.600031	0.137762	-8.86006	16	19	8	3UTR		0	0
hsa-miR-10525-3p	NM_003452	ZNF189	..(((.(.(((((((((((..&))))))))))).).))).	2961	2979	1	-21.6	1	0.000298602	0.603	0.64997	0.595178	-9.17159	15	18	11	3UTR		0	0
hsa-miR-10525-3p	NM_003574	VAPA	.((((..((((((((.(((((&))))).)))))))).)))).	1353	1373	1	-21.4	1	0.109776	0.676	3.48952	3.43435	-7.47102	17	20	8	3UTR		0	0
hsa-miR-10525-3p	NM_003688	CASK	.(((((((((.(((.......&))).))))))))).	2889	2903	1	-19.3	1	1.64431e-05	0.5	0	0	-7.5866	12	14	9	3UTR		0	0
hsa-miR-10525-3p	NM_003724	JRK	.((((((((((((((((((..&))))))).)))))))..)))).	5026	5048	1	-22.5	1	0.0105878	0.397	-0.196844	-0.347826	-3.79332	18	22	7	3UTR		0	0
hsa-miR-10525-3p	NM_003774	GALNT4	(((((((((...(((.(((((&))))))))))))))))).	3752	3770	1	-17.3	1	0.062446	0.662	4.27471	3.52382	-11.5847	17	18	17	3UTR		0	0
hsa-miR-10525-3p	NM_003783	B3GALT2	....((((.((((((((((..&)))))))))))))).	2991	3006	1	-19.4	1	0.000941738	0.603	2.31956	2.81154	-10.603	14	15	14	3UTR		0	0
hsa-miR-10525-3p	NM_003804	RIPK1	(((((((.((..((((((...&)))))).)).))))))).	3385	3403	1	-19	1	0.0106042	0.426	0.0454723	-0.239031	-12.4228	15	18	7	3UTR		0	0
hsa-miR-10525-3p	NM_003916	AP1S2	((..((((((((((.......&))))))))))..)).	891	906	1	-15.7	1	0.0314228	0.721	0.93672	0.532397	-9.49563	12	15	10	3UTR		0	0
hsa-miR-10525-3p	NM_003920	TIMELESS	(((((.(((.(((((((....&))))))))))))))).	3848	3864	1	-19.1	1	0.00353782	0.559	5.50409	4.02756	-7.08104	15	16	15	3UTR		0	0
hsa-miR-10525-3p	NM_003927	MBD2	.((...((((.((((((((((&)))))))))).))))...)).	2235	2256	1	-24	1	0.000316346	0.5	0.0445775	0.108431	-15.6701	16	21	10	3UTR		0	0
hsa-miR-10525-3p	NM_003937	KYNU	...((.((((((((.((((..&)))))))))))).)).	11734	11750	1	-17.8	1	0.000785494	0.485	0.151232	0.0851731	-9.15095	14	16	12	3UTR		0	0
hsa-miR-10525-3p	NM_003943	STBD1	((((((((...(((((((((.&)))))))))...)))))))).	1445	1466	1	-22	1	0.00517712	0.5	0.541163	0.904305	-9.06125	17	21	9	3UTR		0	0
hsa-miR-10525-3p	NM_003950	F2RL3	(((((((....((((((((..&)))))))))))).))).	1867	1884	1	-17.1	1	9.36665e-05	0.471	0.201763	0.0141762	-11.3749	15	17	12	3UTR		0	0
hsa-miR-10525-3p	NM_004034	ANXA7	..((((((.(((((((((...&))))))))).)))))).	2169	2186	1	-19.8	1	0.0163114	0.735	1.58083	2.51737	-6.01339	15	17	9	3UTR		0	0
hsa-miR-10525-3p	NM_004113	FGF12	((((((((((((((.......&.)))))).)))))))).	2097	2118	1	-18.2	1	0.00203503	0.721	0.74485	0.349989	-4.90607	14	17	8	3UTR		0	0
hsa-miR-10525-3p	NM_004128	GTF2F2	((((((((((.(((((.....&.)))))..)))))))))).	1471	1511	1	-20.7	1	0.00307101	0.647	0.166712	0.243814	-6.76235	15	19	10	3UTR		0	0
hsa-miR-10525-3p	NM_004227	CYTH3	(((((((((.((..(((((..&.))))))).))))))))).	3581	3616	1	-17.2	1	0.00071678	0.5	4.77351	5.30408	-7.32605	16	19	9	3UTR		0	0
hsa-miR-10525-3p	NM_004235	KLF4	((((((((((((((.......&))))....)))))))))).	2136	2155	1	-18	1	0.00244448	0.5	1.18755	0.907359	-4.90607	14	19	10	3UTR		0	0
hsa-miR-10525-3p	NM_004262	TMPRSS11D	..((((((.((((((((((((&)))))))))...)))....)))))).	2104	2130	1	-19.9	1	0.169381	0.721	3.17783	1.80872	-6.01339	18	26	9	3UTR		0	0
hsa-miR-10525-3p	NM_004349	RUNX1T1	...(((.((((((((((((..&)))))))))))).))).	5092	5109	1	-21.2	1	0.000787297	0.721	3.18845	4.31309	-8.05823	15	17	12	3UTR		0	0
hsa-miR-10525-3p	NM_004384	CSNK1G3	.((((((((.(((((((((((&)))))))))...)).)).)))))).	2744	2769	1	-23	1	0.00148031	0.559	1.85408	1.0176	-5.03583	19	25	9	3UTR		0	0
hsa-miR-10525-3p	NM_004388	CTBS	.(((((((((((((.......&.))))))))))))).	3191	3212	1	-19.1	1	0.0328981	0.647	-0.374002	0.208979	-4.76182	13	15	13	3UTR		0	0
hsa-miR-10525-3p	NM_004417	DUSP1	.((((.((((((((.((....&.)))))))))))))).	1537	1570	1	-17.9	1	0.00151536	0.544	2.31738	2.79543	-6.42973	14	16	14	3UTR		0	0
hsa-miR-10525-3p	NM_004429	EFNB1	((((((((.(((((.(((...&)))))))).)))))))).	2296	2314	1	-19.4	1	0.0023685	0.471	0.847876	0.858434	-5.72941	16	18	8	3UTR		0	0
hsa-miR-10525-3p	NM_004432	ELAVL2	((((((((..(((((((((((&)))))).))))).........)))))))).	3298	3328	1	-18.9	1	0.0101354	0.618	6.48191	5.59901	-6.23647	19	30	8	3UTR		0	0
hsa-miR-10525-3p	NM_004469	VEGFD	...(((((((((((((((...&))))))))..))))))).	1810	1828	1	-18.4	1	0.00369915	0.588	0.356987	0.934221	-6.51454	15	18	8	3UTR		0	0
hsa-miR-10525-3p	NM_004505	USP6	(((((((..(((((.((((..&)))).)))))..))))))).	6114	6134	1	-23.2	1	0.00315127	0.485	0.714097	0.919388	-8.04305	16	20	7	3UTR		0	0
hsa-miR-10525-3p	NM_004509	SP110	(((.((..(((((((((((..&)))))))))))..))))).	2793	2812	1	-21.3	1	0.00232128	0.574	-0.344563	0.119177	-10.8269	16	19	11	3UTR		0	0
hsa-miR-10525-3p	NM_004531	MOCS2	((((((((.(((..((((((.&))))))..)))))))).))).	2250	2271	1	-18.7	1	0.181392	0.676	-0.0390978	0.262782	-7.13993	17	21	8	3UTR		0	0
hsa-miR-10525-3p	NM_004542	NDUFA3	.((((((((((.(((((....&.))))))))))))))).	654	699	1	-23.3	1	0.00215469	0.412	0.125284	0.0426034	-7.14013	15	17	15	3UTR		0	0
hsa-miR-10525-3p	NM_004586	RPS6KA3	...(((((((((.(.((((..&))))).))))))))).	5910	5926	1	-21.1	1	0.000827758	0.412	5.71815	5.87537	-8.53912	14	16	9	3UTR		0	0
hsa-miR-10525-3p	NM_004591	CCL20	...((((((((((((..(((.&.)))..)))))))))))).	419	451	1	-21.1	1	0.00292888	0.529	-0.436242	0.44701	-6.74759	15	19	12	3UTR		0	0
hsa-miR-10525-3p	NM_004598	SPOCK1	.(((...((.(((((((((..&))))))))).)).))).	4779	4796	1	-18.1	1	0.00182873	0.642	1.23878	0.527779	-12.5995	14	17	9	3UTR		0	0
hsa-miR-10525-3p	NM_004636	SEMA3B	(((((.((((((((.((....&))))))))))..))))).	2537	2555	1	-18	1	0.000404421	0.338	0.772537	0.333993	-6.57398	15	18	10	3UTR		0	0
hsa-miR-10525-3p	NM_004773	ZNHIT3	(((((.((((.((((((((..&)))).)))).))))))))).	598	618	1	-20.3	1	0.00124888	0.485	-0.0482459	-0.710501	-8.66331	17	20	9	3UTR		0	0
hsa-miR-10525-3p	NM_004797	ADIPOQ	.(((((((.(((((((((((.&)))))))).)))...))))))).	3087	3110	1	-21.5	1	0.0126641	0.544	-0.21315	-0.0547377	-4.84971	18	23	8	3UTR		0	0
hsa-miR-10525-3p	NM_004815	ARHGAP29	((((..((.((((((((((..&)))).))))))))..)))).	7594	7614	1	-20.5	1	0.00410048	0.676	4.89039	3.18419	-11.014	16	20	8	3UTR		0	1
hsa-miR-10525-3p	NM_004841	RASAL2	((((((((.(((((.(((...&)))))))).)))))))).	5654	5672	1	-20.1	1	0.000838284	0.588	-0.0848839	-0.155557	-5.72941	16	18	8	3UTR		0	0
hsa-miR-10525-3p	NM_004842	AKAP7	..((((.((((((((((((..&.)))))))....))))))))).	1689	1713	1	-19.5	1	0.0023307	0.676	0.151929	0.816779	-6.50069	16	22	9	3UTR		0	0
hsa-miR-10525-3p	NM_004872	TMEM59	....(((((((((((((((..&))))))))).)))))).	6350	6367	1	-20.7	1	0.00154964	0.603	1.10096	2.64933	-9.54656	15	17	9	3UTR		0	0
hsa-miR-10525-3p	NM_004901	ENTPD4	(((((((((.(((((......&.))))).))))))))).	3991	4030	1	-20	1	0.00169342	0.529	4.40794	4.35421	-5.41313	14	17	9	3UTR		0	0
hsa-miR-10525-3p	NM_004904	CREB5	((((((((((.((((((....&.))))))))))))).))).	2974	2999	1	-19.7	1	7.94793e-05	0.471	-0.301686	0.080031	-6.76235	16	19	13	3UTR		0	0
hsa-miR-10525-3p	NM_004904	CREB5	.(((...((((((((((....&)))))))))).....))).	6700	6719	1	-19.5	1	0.00113282	0.5	0.372337	1.79741	-11.357	13	19	10	3UTR		0	0
hsa-miR-10525-3p	NM_004906	WTAP	.(((((.(((((((((((...&.))))))))))).))))).	1493	1531	1	-20.7	1	0.0939485	0.721	3.39347	1.91244	-5.33701	16	19	11	3UTR		0	1
hsa-miR-10525-3p	NM_004936	CDKN2B	(((((....(((((.(((((.&))))))))))..))))).	1911	1929	1	-17.7	1	0.02359	0.632	0.853384	0.163551	-11.4877	15	18	10	3UTR		0	0
hsa-miR-10525-3p	NM_004967	IBSP	....((((((((((((.....&)))))))))))).	1138	1151	1	-15.2	1	0.059514	0.647	0.410006	0.94487	-9.54656	12	13	12	3UTR		0	0
hsa-miR-10525-3p	NM_004975	KCNB1	(((((((.((((((.......&)))))).))))))).	10817	10832	1	-20.2	1	1.91644e-05	0.515	5.80667	5.81426	-7.21971	13	15	7	3UTR		0	0
hsa-miR-10525-3p	NM_004975	KCNB1	.((((((((.((((((((...&)))))))))))))).)).	11579	11597	1	-19.4	1	0.00037765	0.5	4.576	4.63965	-5.03583	16	18	14	3UTR		0	0
hsa-miR-10525-3p	NM_004992	MECP2	...(((.((((((((((((..&)))))))).))))))).	9692	9709	1	-20.1	1	9.48955e-06	0.397	3.28304	3.02081	-8.05823	15	17	8	3UTR		0	0
hsa-miR-10525-3p	NM_005065	SEL1L	(((((((((((.((.......&.))))))))))))).	3652	3679	1	-16.9	1	0.0576629	0.647	0.572836	-0.0137307	-8.25288	13	15	13	3UTR		0	1
hsa-miR-10525-3p	NM_005135	SLC12A6	((.(((.(((((((.(((...&))))))))))))))).	4469	4485	1	-18	1	0.00364105	0.559	7.04678	4.9757	-7.77425	15	16	15	3UTR		0	0
hsa-miR-10525-3p	NM_005154	USP8	.(((((((.((((((((....&)))))))).).)))))).	5783	5801	1	-21.1	1	4.04314e-05	0.471	-0.873774	-0.150779	-4.84971	15	18	8	3UTR		0	0
hsa-miR-10525-3p	NM_005156	PTBP3	((((((((((...((((....&.)))))))))))))).	6155	6199	1	-17.9	1	0.00249847	0.618	5.26207	3.77282	-11.3983	14	16	14	3UTR		0	0
hsa-miR-10525-3p	NM_005206	CRK	.(((....(((((((((((((&))))).))))))))....))).	2667	2689	1	-21.9	1	0.00326656	0.515	2.08179	2.53207	-13.6706	16	22	8	3UTR		0	0
hsa-miR-10525-3p	NM_005230	ELK3	...((.((.((((((((((..&)))))))))).))..)).	3453	3471	1	-20.1	1	4.62783e-06	0.426	0.0833802	-0.025677	-9.47189	14	18	10	3UTR		0	0
hsa-miR-10525-3p	NM_005232	EPHA1	(((((((((.(((.((((...&)))))))))))))))).	3035	3052	1	-19.9	1	0.000160523	0.338	0	0	-6.03692	16	17	16	3UTR		0	0
hsa-miR-10525-3p	NM_005236	ERCC4	((((((((((((((..((((.&))))..))..........))))))))).))).	2801	2833	1	-18.6	1	0.0244325	0.632	0.896539	1.77288	-4.90607	18	32	9	3UTR		0	0
hsa-miR-10525-3p	NM_005324	H3-3B	.((((..(.(.((((((((..&)))))))).).)..)))).	1953	1972	1	-18.5	1	0.0175593	0.574	2.57591	3.18902	-11.1191	14	19	8	3UTR		0	0
hsa-miR-10525-3p	NM_005453	ZBTB22	.(((((((((...((((((((&))))))))))))))))).	2391	2409	1	-20.3	1	5.48111e-05	0.456	3.34683	2.52108	-11.254	17	18	17	3UTR		0	0
hsa-miR-10525-3p	NM_005506	SCARB2	(((((((((((.((.((((((&)))))).))))))))).)))).	3003	3025	1	-20	1	0.0300374	0.603	2.88627	1.81461	-8.01983	19	22	9	3UTR		0	0
hsa-miR-10525-3p	NM_005526	HSF1	(((((((((...(((((((..&))))).))))))))))).	1993	2011	1	-19.3	1	0.000994562	0.574	0.307615	0.261143	-11.3517	16	18	11	3UTR		0	1
hsa-miR-10525-3p	NM_005565	LCP2	.((((.(((((((((((((..&)))))))))..)))).)))).	3672	3693	1	-21.8	1	0.0142396	0.529	2.83677	1.7528	-5.69428	17	21	9	3UTR		0	0
hsa-miR-10525-3p	NM_005595	NFIA	((((((((((((....(((..&)))...)))))))))))).	1817	1836	1	-18	1	0.000784654	0.618	2.88194	2.61239	-7.05204	15	19	12	3UTR		0	0
hsa-miR-10525-3p	NM_005617	RPS14	.((((((..(((((.((((..&))))))))))))))).	1785	1801	1	-18	1	0.00122315	0.544	6.05624	5.75287	-7.8988	15	16	15	3UTR		0	0
hsa-miR-10525-3p	NM_005671	UBXN8	.((((.(((((((((((((((&))))))))))))))).)))).	1307	1328	1	-21.4	1	0.000737352	0.676	0.0700629	0.129487	-5.69428	19	21	15	3UTR		0	0
hsa-miR-10525-3p	NM_005724	TSPAN3	(((((((((.((((((((...&.)))))).))))))))))).	2608	2645	1	-21.8	1	0.000333949	0.515	0.124382	0.137693	-5.18008	17	20	11	3UTR		0	0
hsa-miR-10525-3p	NM_005738	ARL4A	...((((((((.((.(((((.&))))))))))))))).	1533	1549	1	-15.4	1	0.00192431	0.676	0.124436	1.42184	-10.5968	15	16	15	3UTR		0	0
hsa-miR-10525-3p	NM_005744	ARIH1	((((((((((.(((((((((.&)))..))))))))))))).))).	19128	19151	1	-20.4	1	0.00121703	0.441	0.202602	-0.0755334	-6.76235	19	23	13	3UTR		0	0
hsa-miR-10525-3p	NM_005744	ARIH1	...((((((((((.((((...&)))).)))))))))).	8371	8387	1	-19.8	1	0.00576623	0.574	-0.0528144	-0.0287871	-7.37138	14	16	10	3UTR		0	0
hsa-miR-10525-3p	NM_005806	OLIG2	(((((((...(((((((((..&.))))))))).))))))).	1920	1945	1	-20.9	1	0.0018469	0.574	0.0160707	0.217153	-8.55011	16	19	9	3UTR		0	0
hsa-miR-10525-3p	NM_005826	HNRNPR	.((((((((.(.(((((....&.))))).)..)))))))).	2847	2874	1	-19.1	1	0.116086	0.735	0.869147	1.01565	-8.38263	14	19	8	3UTR		0	0
hsa-miR-10525-3p	NM_005901	SMAD2	.(((...(..(((((((((((&)))))))))))..)...))).	14417	14438	1	-20.7	1	0.0102027	0.544	0.0695512	0.0913877	-13.6559	15	21	11	3UTR		0	0
hsa-miR-10525-3p	NM_005910	MAPT	...(((((.(.((((((((..&)))))))).)))))).	5053	5069	1	-21.5	1	1.89912e-06	0.426	1.06234	0.622352	-10.3957	14	16	8	3UTR		0	0
hsa-miR-10525-3p	NM_005914	MCM4	..(((((((.((((((((((.&)))))))).)).))))))).	3338	3358	1	-21.3	1	0.0339181	0.603	-0.0397859	-0.135781	-6.19951	17	20	8	3UTR		0	0
hsa-miR-10525-3p	NM_005935	AFF1	.((((((..(((((((((...&))))))))).)))))).	4308	4325	1	-17.8	1	0.00485025	0.721	0.334456	1.32937	-7.16335	15	17	9	3UTR		0	0
hsa-miR-10525-3p	NM_005940	MMP11	((((((((((.(((.......&))).)))))))))).	1659	1674	1	-20.2	1	1.46039e-05	0.338	1.11505	0.0956613	-7.73085	13	15	10	3UTR		0	0
hsa-miR-10525-3p	NM_005941	MMP16	((((((((((((((.(((...&)))))))).........))))))))).	8013	8040	1	-18.8	1	0.000333363	0.632	1.18988	1.41152	-4.67302	17	27	9	3UTR		0	0
hsa-miR-10525-3p	NM_005977	RNF6	...((((.(((((((((((..&))))))))))))))).	2984	3000	1	-17.5	1	0.000487415	0.779	4.81939	3.88537	-8.82818	15	16	15	3UTR		0	0
hsa-miR-10525-3p	NM_006030	CACNA2D2	...((((..((.(((((((((&))))))))).)))))).	5146	5163	1	-18.1	1	0.00498865	0.647	2.73098	3.5578	-13.2314	15	17	9	3UTR		0	0
hsa-miR-10525-3p	NM_006033	LIPG	((((((.((((((((.(((((&.))))).)))))))).)))))).	3847	3892	1	-20.6	1	0.0238517	0.588	0.017621	0.157075	-5.71431	19	23	8	3UTR		0	0
hsa-miR-10525-3p	NM_006057	B3GALT5	((((((((((..(((((((..&.))))))).....)))))))))).	8785	8825	1	-24.3	1	0.000573371	0.588	-0.318133	0.0114931	-10.1092	17	24	10	3UTR		0	0
hsa-miR-10525-3p	NM_006096	NDRG1	.(((((((((((.((......&)).))))))))))).	2057	2072	1	-17.3	1	0.0015865	0.603	3.61616	5.06342	-5.3155	13	15	11	3UTR		0	0
hsa-miR-10525-3p	NM_006134	TMEM50B	((((.((((((((..((((..&))))..))))))))...)))).	928	950	1	-19.3	1	0.0646617	0.559	1.95944	1.15527	-9.6489	16	22	8	3UTR		0	0
hsa-miR-10525-3p	NM_006154	NEDD4	.........((((((((((((&)))))))))))).	4823	4836	1	-18.1	0	0.000672643	0.574	0.973031	2.069	-20.4803	12	13	12	3UTR		0	0
hsa-miR-10525-3p	NM_006242	PPP1R3D	.((((((((((((((((((..&.))).)))...)))))))))))).	1768	1794	1	-23	1	0.000331414	0.471	0.601195	0.440191	-3.79332	18	24	12	3UTR		0	0
hsa-miR-10525-3p	NM_006244	PPP2R5B	.((((((((((((.((((...&.)))).))))....)))))))).	2642	2680	1	-18.9	1	0.0118654	0.441	1.01618	1.64526	-4.65016	16	23	8	3UTR		0	0
hsa-miR-10525-3p	NM_006293	TYRO3	(((((..((.(((((((((..&)))))))))...))..))))).	3162	3184	1	-19.6	1	0.00335396	0.574	0.415267	0.547855	-8.62473	16	22	9	3UTR		0	0
hsa-miR-10525-3p	NM_006361	HOXB13	.(((((((((.(((.......&.))).))))))))).	1793	1820	1	-17.2	1	0.0011709	0.559	-0.203326	-0.0453285	-7.5866	12	15	9	3UTR		0	0
hsa-miR-10525-3p	NM_006420	ARFGEF2	......(((((((((((((((&)))))))).))))))).	8997	9014	1	-20.6	0	0.00683608	0.75	3.93778	3.17031	-15.5666	15	17	8	3UTR		0	0
hsa-miR-10525-3p	NM_006457	PDLIM5	(((((((((.((.(((((...&))))))).))))))))).	3898	3916	1	-17.3	1	0.00412466	0.559	0.417192	0.206644	-6.46921	16	18	9	3UTR		0	0
hsa-miR-10525-3p	NM_006496	GNAI3	.(((((((((((((.((((..&.))))...))))))))))))).	8445	8487	1	-21.7	1	0.00474346	0.647	-0.202621	0.147573	-4.52877	17	22	13	3UTR		0	0
hsa-miR-10525-3p	NM_006539	CACNG3	.((((((((.((((.((((((&)))))).)))))))))))).	1718	1738	1	-25.2	1	0.00186658	0.471	0.17055	0.542437	-5.77128	18	20	12	3UTR		0	0
hsa-miR-10525-3p	NM_006539	CACNG3	.(((((((..((((((((.(.&).)))).))))..))))))).	1431	1452	1	-20.5	1	0.0022452	0.603	3.6999	1.63101	-6.09222	16	21	7	3UTR		0	0
hsa-miR-10525-3p	NM_006546	IGF2BP1	..(((((.(((((((((((..&.)))))))))))..))))).	2902	2924	1	-24.8	1	0.000670452	0.5	0.725842	0.417103	-7.27064	16	20	11	3UTR		0	0
hsa-miR-10525-3p	NM_006591	POLD3	(.(((((((((((((((....&.))))))))))))).)).).	2811	2837	1	-18.5	1	0.00624718	0.559	0.496402	0.577185	-5.10125	16	20	13	3UTR		0	0
hsa-miR-10525-3p	NM_006625	SRSF10	.((((..(((((((((((...&))))))))))).)))).	2459	2476	1	-19.4	1	0.0903605	0.691	1.21863	1.41094	-7.23797	15	17	11	3UTR		0	0
hsa-miR-10525-3p	NM_006665	HPSE	((((((((((.((((((....&.))))))))))))).))).	2363	2411	1	-20.3	1	0.00125017	0.485	0.0349825	-0.066096	-6.76235	16	19	13	3UTR		0	0
hsa-miR-10525-3p	NM_006704	SUGT1	((((((((((.((((((....&))))))))))))).))).	4181	4199	1	-19.7	1	0.000172541	0.456	0.135541	-0.345205	-6.76235	16	18	13	3UTR		0	0
hsa-miR-10525-3p	NM_006722	MITF	(((((((((((.((.......&)).))))))))))).	2860	2875	1	-16.9	1	9.24459e-05	0.662	1.05624	1.90843	-8.25288	13	15	11	3UTR		0	0
hsa-miR-10525-3p	NM_006755	TALDO1	...(((((((.((..((((..&))))..)).))))))).	1130	1147	1	-19.3	1	0.0120841	0.691	0.598813	0.56671	-10.9316	13	17	7	3UTR		0	0
hsa-miR-10525-3p	NM_006814	PSMF1	...(((((((((((((((((.&)))))))))))))..)))).	3164	3184	1	-20.6	1	0.0157586	0.632	0.198876	0.259828	-6.51454	17	20	13	3UTR		0	0
hsa-miR-10525-3p	NM_006870	DSTN	.(((((((((((((((((.((&.)).).))))))))))).))))).	1965	1999	1	-24.7	1	0.000136222	0.456	0.107962	0.0688214	-3.79332	19	24	11	3UTR		0	0
hsa-miR-10525-3p	NM_006916	RPE	.((.((((.(((((((((.((&)).))))))))).)))).)).	1139	1160	1	-20.1	1	0.000842143	0.662	0.778187	0.391062	-7.88174	17	21	9	3UTR		0	0
hsa-miR-10525-3p	NM_006924	SRSF1	.(((((((((..((((((((.&))))))))..))))))))).	3820	3840	1	-23.9	1	0.00360976	0.662	2.18084	1.91593	-9.9649	17	20	9	3UTR		0	0
hsa-miR-10525-3p	NM_006938	SNRPD1	.((((((((((((((((....&.)))))))).)))))))).	3305	3350	1	-23	1	3.92222e-05	0.471	0.119271	0.195842	-3.79332	16	19	8	3UTR		0	0
hsa-miR-10525-3p	NM_007064	KALRN	.((((((((((((((((((((&)))))))))...........)))))))..)))).	8197	8231	1	-18.6	1	0.00126051	0.662	0.978388	0.631731	-3.79332	20	34	9	3UTR		0	0
hsa-miR-10525-3p	NM_007067	KAT7	.(((((((((((.(((((...&.))))).))))))))))).	5937	5971	1	-23.7	1	0.00155537	0.618	-0.282766	-0.31782	-5.08246	16	19	11	3UTR		0	0
hsa-miR-10525-3p	NM_007085	FSTL1	((((((((((((((.......&.)))))))))))))).	4630	4661	1	-20.2	1	0.0857303	0.632	0.934956	2.19653	-4.90607	14	16	14	3UTR		0	0
hsa-miR-10525-3p	NM_007156	ZXDA	.(((..((.((((((((((..&)))))))))).))))).	3939	3956	1	-17.7	1	0.000971481	0.618	1.94842	1.8118	-10.8697	15	17	10	3UTR		0	0
hsa-miR-10525-3p	NM_007159	SLMAP	((((((((((((((((..(((&.)))..))))).))))))))))).	4759	4791	1	-21	1	0.000895522	0.676	1.93222	1.47785	-3.93757	19	24	11	3UTR		0	0
hsa-miR-10525-3p	NM_007199	IRAK3	.(((((((.((((((((....&)))))))).))))))).	6787	6804	1	-19.4	1	0.00266248	0.647	0.241507	0.237395	-4.84971	15	17	8	3UTR		0	0
hsa-miR-10525-3p	NM_007202	AKAP10	.((((((((.((((.(((((.&))))))))))))))).)).	3623	3642	1	-17.6	1	0.000193588	0.662	5.40281	5.54304	-5.77128	17	19	15	3UTR		0	0
hsa-miR-10525-3p	NM_007235	XPOT	((((((((((((.((((....&.))))))))))))).))).	5428	5476	1	-20.6	1	0.00334578	0.5	-0.102444	-0.154238	-5.22671	16	19	13	3UTR		0	0
hsa-miR-10525-3p	NM_007315	STAT1	.((((((((((.((((((...&.)))).)))))))))).)).	3091	3122	1	-19.2	1	0.00153552	0.632	3.62119	3.14603	-7.14013	16	20	10	3UTR		0	0
hsa-miR-10525-3p	NM_007325	GRIA3	(((((.(((.((((((((((.&.)))).)))))).)))))))).	3797	3845	1	-20.4	1	0.0997598	0.618	1.91548	2.08754	-7.08104	18	22	8	3UTR		0	0
hsa-miR-10525-3p	NM_007334	KLRD1	(((.((((((((((((((((.&)))))))))...))))))).))).	2402	2426	1	-24	1	9.65872e-05	0.574	-0.148507	-0.0670646	-6.9696	19	24	9	3UTR		0	0
hsa-miR-10525-3p	NM_007334	KLRD1	.(((((...(((((.((((((&)))))))))))...))))).	12274	12294	1	-20.8	1	0.0019349	0.544	0	0	-9.44249	16	20	11	3UTR		0	0
hsa-miR-10525-3p	NM_012125	CHRM5	..((((((((.(((((.....&))))).)))))))).	3968	3983	1	-18.4	1	0.0398255	0.735	0.26401	0.0515988	-7.78178	13	15	8	3UTR		0	0
hsa-miR-10525-3p	NM_012154	AGO2	.((((.(((((((((......&.))))))))).)))).	6075	6102	1	-19.6	1	0.000203288	0.588	-0.340697	0.209898	-5.92733	13	16	9	3UTR		0	0
hsa-miR-10525-3p	NM_012199	AGO1	(((((((.((((((((((...&.))))))))))))))))).	12330	12359	1	-23.5	1	0.00223268	0.559	0.293284	0.243633	-6.25121	17	19	17	3UTR		0	0
hsa-miR-10525-3p	NM_012228	MSRB2	..((((((.(((((((((...&.))))))))).....)))))).	910	937	1	-17.5	1	0.00822967	0.471	0.0742676	-0.0105629	-6.01339	15	22	9	3UTR		0	0
hsa-miR-10525-3p	NM_012296	GAB2	..(((((.(((((((((....&.))))))))).))))).	3359	3406	1	-20.7	1	3.78018e-05	0.426	-0.356252	-0.258781	-7.27064	14	17	9	3UTR		0	0
hsa-miR-10525-3p	NM_012308	KDM2A	((((((..((((((((.....&))))))))....)))))).	6582	6601	1	-18.4	1	0.0163232	0.544	1.25815	0.852271	-7.7949	14	19	8	3UTR		0	0
hsa-miR-10525-3p	NM_012317	LDOC1	.((((.((((((((((((((.&))))))))........)))))))))).	1866	1893	1	-20.7	1	0.0190207	0.515	0.0386013	-0.0034277	-5.69428	18	27	10	3UTR		0	0
hsa-miR-10525-3p	NM_012322	LSM5	...((((((((((((......&)))))))))))).	1090	1103	1	-18.6	1	0.0596986	0.662	0.378202	0.156778	-6.74759	12	13	12	3UTR		0	0
hsa-miR-10525-3p	NM_012369	OR2F1	(((((((..((((((......&))))))..))))))).	2867	2883	1	-17.8	1	0.0103921	0.662	0	0	-7.54065	13	16	7	3UTR		0	0
hsa-miR-10525-3p	NM_012424	RPS6KC1	.((((((((((((.(((((..&.))))))))....))))))))).	4887	4924	1	-19.3	1	0.00189561	0.529	2.82365	1.95531	-4.65016	17	23	9	3UTR		0	0
hsa-miR-10525-3p	NM_012425	RSU1	(((((...((((((.(((...&))))))))).....))))).	2251	2271	1	-15	1	0.529636	0.603	0.219239	0.458963	-10.4313	14	20	9	3UTR		0	0
hsa-miR-10525-3p	NM_012426	SF3B3	.(((((((((((((((((.((&.)).).)))))))).)))))))).	9002	9036	1	-21.7	1	0.00181604	0.5	-0.264855	0.0221157	-3.79332	19	24	8	3UTR		0	0
hsa-miR-10525-3p	NM_012429	SEC14L2	.((((.(.((((((((((((.&))))))))...)))).)..)))).	4127	4151	1	-19.5	1	0.000927838	0.515	0.213087	0.0774945	-8.00792	17	24	8	3UTR		0	0
hsa-miR-10525-3p	NM_012448	STAT5B	..(((((((((((((......&))))))))))))).	2737	2751	1	-17.9	1	0.000146623	0.515	5.15258	2.52512	-5.19005	13	14	13	3UTR		0	0
hsa-miR-10525-3p	NM_012448	STAT5B	.(((((((.(((((((((...&.))))))))))))).))).	3247	3268	1	-17.4	1	0.00426816	0.529	7.41975	4.66235	-4.84971	16	19	13	3UTR		0	0
hsa-miR-10525-3p	NM_012479	YWHAG	((((((((((((((((((((.&))))))..))))))))))).))).	1792	1816	1	-21.8	1	0.00936396	0.618	0.611971	0.675543	-3.93757	20	24	11	3UTR		0	0
hsa-miR-10525-3p	NM_013253	DKK3	(((((..(((((((((((.(.&).)))..)))))))).........))))).	2062	2092	1	-17.6	1	0.00905683	0.662	5.00365	2.37299	-7.38222	17	30	8	3UTR		0	0
hsa-miR-10525-3p	NM_013304	ZDHHC1	(((((((((..(((((.(((.&.))).)))))..))))))))).	2157	2199	1	-20.1	1	0.000322146	0.353	1.42473	0.00849407	-8.00486	17	22	9	3UTR		0	0
hsa-miR-10525-3p	NM_013305	ST8SIA5	(((((.((.((((((((....&)))))))).)).))))).	9487	9505	1	-19.2	1	0.0101402	0.5	-0.350799	-0.114561	-6.89492	15	18	8	3UTR		0	0
hsa-miR-10525-3p	NM_013372	GREM1	.(((.(((..(((((((((..&)))))))))....)))))).	722	742	1	-21	1	0.000391839	0.471	0	0	-10.2113	15	20	9	3UTR		0	0
hsa-miR-10525-3p	NM_013410	AK4	......((((((((((((.((&)).)))))))))))).	2753	2769	1	-20.7	0	0.0106333	0.574	0.0353154	0.179574	-15.5666	14	16	12	3UTR		0	0
hsa-miR-10525-3p	NM_013989	DIO2	((((((.(((((((.((....&))))))).)).)))))).	4915	4933	1	-18.5	1	0.00857705	0.544	0.257763	0.47919	-6.21671	15	18	7	3UTR		0	0
hsa-miR-10525-3p	NM_014007	ZBTB43	.......((((((((((((((&)))))))))))))).	5732	5747	1	-21.1	0	0.000292901	0.721	2.7788	3.02207	-17.1102	14	15	14	3UTR		0	0
hsa-miR-10525-3p	NM_014050	MRPL42	((((((((((.((((((....&))))))))))))).))).	12596	12614	1	-19.9	1	0.000859757	0.471	0.111833	0.105468	-6.76235	16	18	13	3UTR		0	0
hsa-miR-10525-3p	NM_014060	MCTS1	.(((((.((((((((......&.)))))))).))))).	6696	6733	1	-19.4	1	0.0149031	0.647	0.413067	0.267441	-5.57006	13	16	8	3UTR		0	0
hsa-miR-10525-3p	NM_014112	TRPS1	.(((.((((((((((((....&))).)))))))))))).	8125	8142	1	-17	1	0.00161448	0.647	5.63273	3.58388	-7.91236	15	17	12	3UTR		0	0
hsa-miR-10525-3p	NM_014117	C16orf72	(((((((.(((.((((((...&.))))))))).))))))).	1776	1823	1	-21.8	1	0.00130428	0.662	4.8913	3.05869	-9.59801	16	19	9	3UTR		0	0
hsa-miR-10525-3p	NM_014155	ZBTB44	.((((((((((((((((((((&))))))........))).))))))))))).	4373	4403	1	-19.6	1	0.0109334	0.632	0.363532	0.653179	-3.79332	20	30	11	3UTR		0	0
hsa-miR-10525-3p	NM_014241	HACD1	...(((.((((((((((((((&))))))))))).)))))).	1138	1157	1	-17.1	1	0.0135196	0.765	0.400567	0.398311	-8.05823	17	19	11	3UTR		0	0
hsa-miR-10525-3p	NM_014244	ADAMTS2	...((((..((((((((((((&)))))))))))))))).	3991	4008	1	-19.6	1	0.000860668	0.456	2.41859	3.53136	-9.88456	16	17	16	3UTR		0	0
hsa-miR-10525-3p	NM_014288	ITGB3BP	...(((.((((((((((((..&))))))))))))))).	748	764	1	-22	1	0.000810295	0.632	2.10539	1.11226	-8.05823	15	16	15	3UTR		0	0
hsa-miR-10525-3p	NM_014289	CAPN6	((((((.(((.((((((((((&))))))))).).))).)))))).	2104	2127	1	-24.6	1	0.0213512	0.632	4.07803	2.73669	-8.30604	19	23	9	3UTR		0	0
hsa-miR-10525-3p	NM_014308	PIK3R5	(((((((..((((((((....&.))))))))....))))))).	3938	3975	1	-19.9	1	0.00482749	0.5	4.533	2.96016	-7.3076	15	21	8	3UTR		0	0
hsa-miR-10525-3p	NM_014311	SMUG1	.((((((((((.((((((...&)))))).)))..))))))).	1677	1697	1	-21.6	1	0.0444873	0.529	0.0505614	-0.154224	-7.14013	16	20	7	3UTR		0	0
hsa-miR-10525-3p	NM_014331	SLC7A11	...(((((((((.(.(((((.&))))))))))))))).	8912	8928	1	-18.7	1	0.00174444	0.544	3.41122	3.72008	-8.53912	15	16	15	3UTR		0	0
hsa-miR-10525-3p	NM_014398	LAMP3	......((((((((.(((((.&)))))..)))))))).	1484	1500	1	-19.3	0	0.079489	0.706	0.983224	-0.0600428	-16.302	13	16	8	3UTR		0	0
hsa-miR-10525-3p	NM_014445	SERP1	((((((.((.(((((((((..&)))))))..........)))).)))))).	2203	2232	1	-17.7	1	0.118978	0.662	2.19081	2.23448	-6.72377	17	29	7	3UTR		0	0
hsa-miR-10525-3p	NM_014505	KCNMB4	.((((((.(((((.((((...&))))))))))))))).	3484	3500	1	-17.6	1	0.0281281	0.603	0.360859	0.320986	-6.9638	15	16	15	3UTR		0	0
hsa-miR-10525-3p	NM_014508	APOBEC3C	((.(((((.((.(((((((..&))))))).))))))))).	1897	1915	1	-20.4	1	1.05622e-05	0.5	0.207337	0.0561102	-9.89831	16	18	9	3UTR		0	0
hsa-miR-10525-3p	NM_001318508	FCF1	((.(((((((((((..((((.&))))..))))))))))).)).	2686	2707	1	-21.9	1	0.00132281	0.588	-0.0413137	0.292865	-6.46361	17	21	11	3UTR		0	0
hsa-miR-10525-3p	NM_001318740	DCUN1D5	(((((((((((.((.......&)).))))))))))).	1339	1354	1	-17.9	1	0.000229219	0.559	0.508618	-0.159969	-8.25288	13	15	11	3UTR		0	0
hsa-miR-10525-3p	NM_001318809	TBC1D7-LOC100130357	.......(((((((((((...&.))))))))))).	1155	1189	1	-20.8	0	3.79569e-06	0.544	-0.0551703	0.0292809	-17.1102	11	13	11	3UTR		0	0
hsa-miR-10525-3p	NM_001318927	RPE	.((.((((.(((((((((.((&)).))))))))).)))).)).	1263	1284	1	-20.1	1	0.000842143	0.662	0.778187	0.391062	-7.88174	17	21	9	3UTR		0	0
hsa-miR-10525-3p	NM_001318929	RPE	.((.((((.(((((((((.((&)).))))))))).)))).)).	1161	1182	1	-20.1	1	0.000842143	0.662	0.240393	0.371333	-7.88174	17	21	9	3UTR		0	0
hsa-miR-10525-3p	NM_001318930	RPE	.((.((((.(((((((((.((&)).))))))))).)))).)).	1154	1175	1	-20.1	1	0.000842143	0.662	0.778187	0.391062	-7.88174	17	21	9	3UTR		0	0
hsa-miR-10525-3p	NM_001319108	OSM	.((((.((.(((((((((...&)))))))))))..)))).	2163	2181	1	-18.7	1	0.00347574	0.382	1.84194	0.590548	-6.75067	15	18	11	3UTR		0	0
hsa-miR-10525-3p	NM_001319143	AK2	...((((((.((((((((...&)))))))))))))).	3538	3553	1	-18.1	1	0.0198989	0.603	0	0	-7.75705	14	15	14	3UTR		0	0
hsa-miR-10525-3p	NM_001320227	NMD3	.(((((((.(((((((((.((&.)).).))))))))))))))).	1794	1823	1	-23.9	1	5.01781e-05	0.441	0.117858	-0.0878174	-4.84971	18	22	15	3UTR		0	0
hsa-miR-10525-3p	NM_001320522	DDX19A	...((((.((.((((((((..&)))))))).)).)))).	1589	1606	1	-18.1	1	0.000637177	0.662	0.524323	1.17343	-11.6529	14	17	8	3UTR		0	0
hsa-miR-10525-3p	NM_001320525	DDX19A	...((((.((.((((((((..&)))))))).)).)))).	1743	1760	1	-18.1	1	0.000637177	0.662	0.524323	1.17343	-11.6529	14	17	8	3UTR		0	0
hsa-miR-10525-3p	NM_001320619	FAS	.((((((((((.((.......&.)))))))))))).	2867	2915	1	-18.3	1	0.00482139	0.618	-0.540417	-0.0816196	-8.10863	12	14	12	3UTR		0	0
hsa-miR-10525-3p	NM_001320722	CACNB4	...(((((.((((((((((..&))).)))))))))))).	8116	8133	1	-18	1	0.00318709	0.706	2.2916	2.46981	-7.57093	15	17	12	3UTR		0	0
hsa-miR-10525-3p	NM_001320752	STS	((((((.(((((.((((((..&))))))))))))))))).	6139	6157	1	-20.7	1	6.69483e-05	0.441	-0.0403781	0.00196383	-6.77039	17	18	17	3UTR		0	1
hsa-miR-10525-3p	NM_001320768	CYYR1	..((((((((.(((((((...&.))))))).)))))))).	2250	2285	1	-18.8	1	0.00218435	0.691	-0.0240321	1.41087	-7.78178	15	18	8	3UTR		0	0
hsa-miR-10525-3p	NM_001320917	CHRM5	..((((((((.(((((.....&))))).)))))))).	3636	3651	1	-18.4	1	0.0398255	0.735	0.26401	0.0515988	-7.78178	13	15	8	3UTR		0	0
hsa-miR-10525-3p	NM_001321118	CCDC115	(((((..((((((.(((((..&))))).))))))))))).	1228	1246	1	-19.2	1	0.0622334	0.529	0.40319	1.04449	-8.23906	16	18	11	3UTR		0	0
hsa-miR-10525-3p	NM_001321162	METTL8	.(((((.((((((((((((..&))))))))))...))))))).	4428	4449	1	-19.1	1	3.89058e-05	0.559	0.259101	0.336521	-5.33701	17	21	10	3UTR		0	0
hsa-miR-10525-3p	NM_001321218	B9D1	(((((((((((((...(((..&)))....))))))))))).)).	1648	1670	1	-17.5	1	0.00695105	0.662	-0.440226	-0.0896236	-5.76291	16	22	11	3UTR		0	0
hsa-miR-10525-3p	NM_001321741	TTC26	.((((((((.(((((.(((((&.))))))))))...)))))))).	3833	3866	1	-19.2	1	0.0170712	0.676	0.227361	0.347426	-5.26888	18	23	10	3UTR		0	0
hsa-miR-10525-3p	NM_001321829	CCDC186	(((((((....((((((((..&)))))))))))).))).	4084	4101	1	-17.4	1	0.00248351	0.559	0.154083	0.489639	-11.3749	15	17	12	3UTR		0	0
hsa-miR-10525-3p	NM_001321895	HDAC9	.(((((((((((((((.....&.))))).)))))))))).	2502	2546	1	-20	1	0.0088667	0.647	0.981732	0.90123	-3.79332	15	18	10	3UTR		0	0
hsa-miR-10525-3p	NM_001322004	PMS2	(((((.((.(((((((((.((&)).))))))))).))))))).	4359	4380	1	-21.6	1	0.00187473	0.412	4.75484	3.52671	-6.89492	18	21	9	3UTR		0	0
hsa-miR-10525-3p	NM_001322105	SIGLEC10	(((((((..(((((.((((..&))))))))))))).))).	1752	1770	1	-17.4	1	4.41069e-06	0.5	1.11013	0.276872	-8.04305	16	18	13	3UTR		0	0
hsa-miR-10525-3p	NM_001322814	SOD2	((((...((((.(((((((..&))))))))))).)))).	12250	12267	1	-21.3	1	0.00807581	0.441	0.00339029	0.0830629	-14.8481	15	17	11	3UTR		0	0
hsa-miR-10525-3p	NM_001322815	SOD2	((((...((((.(((((((..&))))))))))).)))).	12187	12204	1	-21.3	1	0.00807581	0.441	-0.28157	-0.0120936	-14.8481	15	17	11	3UTR		0	0
hsa-miR-10525-3p	NM_001322943	DSE	.((((((((((.(((((((((&)))))))...........)).)))))...))))).	1278	1313	1	-19.3	1	0.0108801	0.529	5.33129	4.16538	-7.14013	19	35	7	3UTR		0	0
hsa-miR-10525-3p	NM_001322944	DSE	.((((((((((.(((((((((&)))))))...........)).)))))...))))).	1518	1553	1	-19.3	1	0.0108801	0.529	5.33129	4.16538	-7.14013	19	35	7	3UTR		0	0
hsa-miR-10525-3p	NM_001323408	PSMF1	...(((((((((((((((((.&)))))))))))))..)))).	1966	1986	1	-20.6	1	0.0157586	0.632	0.198876	0.259828	-6.51454	17	20	13	3UTR		0	0
hsa-miR-10525-3p	NM_001323627	ZDHHC1	(((((((((..(((((.(((.&.))).)))))..))))))))).	2092	2134	1	-20.1	1	0.000322146	0.353	1.42473	0.00849407	-8.00486	17	22	9	3UTR		0	0
hsa-miR-10525-3p	NM_001329	CTBP2	(((((((((.((((.......&))))))))))))).	3675	3689	1	-16.7	1	0.0135681	0.515	-0.0591731	0.129665	-6.14858	13	14	13	3UTR		0	1
hsa-miR-10525-3p	NM_001329752	FAM136A	(((((.((((..(((((....&)))))...))))))))).	987	1005	1	-17.7	1	0.0379621	0.676	-0.339289	0.0221441	-12.0101	14	18	9	3UTR		0	0
hsa-miR-10525-3p	NM_001329755	FAM136A	(((((.((((..(((((....&)))))...))))))))).	1289	1307	1	-17.7	1	0.0379621	0.676	-0.437975	0.975688	-12.0101	14	18	9	3UTR		0	0
hsa-miR-10525-3p	NM_001329788	ZPLD1	.(((((((.((((((......&))))))))))))).	1899	1913	1	-17.5	1	0.0101675	0.676	0.411202	0.376866	-5.08276	13	14	13	3UTR		0	0
hsa-miR-10525-3p	NM_001329939	TGFB3	.((((((((((((((((((((&)))))).))))))))........)))))).	3100	3130	1	-21.7	1	0.000312961	0.485	1.08912	1.62858	-3.79332	20	30	8	3UTR		0	0
hsa-miR-10525-3p	NM_001330071	DCLK1	......(((((((((((....&))))))))))).	5652	5664	1	-16.3	0	0.00923226	0.662	4.00159	2.09216	-15.5666	11	12	11	3UTR		0	0
hsa-miR-10525-3p	NM_001330110	CYB5D1	......((.(((((((((((.&))))))))))).)).	1429	1444	1	-20.3	0	0.00401047	0.574	-0.396441	0.0574484	-16.6229	13	15	11	3UTR		0	0
hsa-miR-10525-3p	NM_001330113	CACNB4	...(((((.((((((((((..&))).)))))))))))).	7664	7681	1	-18	1	0.00318709	0.706	2.12614	2.33402	-7.57093	15	17	12	3UTR		0	0
hsa-miR-10525-3p	NM_001330115	CACNB4	...(((((.((((((((((..&))).)))))))))))).	7767	7784	1	-18	1	0.00318709	0.706	2.2916	2.46981	-7.57093	15	17	12	3UTR		0	0
hsa-miR-10525-3p	NM_001330116	CACNB4	...(((((.((((((((((..&))).)))))))))))).	7927	7944	1	-18	1	0.00318709	0.706	2.2916	2.46981	-7.57093	15	17	12	3UTR		0	0
hsa-miR-10525-3p	NM_001330117	CACNB4	...(((((.((((((((((..&))).)))))))))))).	8262	8279	1	-18	1	0.00318709	0.706	2.2916	2.46981	-7.57093	15	17	12	3UTR		0	0
hsa-miR-10525-3p	NM_001330118	CACNB4	...(((((.((((((((((..&))).)))))))))))).	7973	7990	1	-18	1	0.00318709	0.706	1.9501	0.737891	-7.57093	15	17	12	3UTR		0	0
hsa-miR-10525-3p	NM_001330152	AKAP10	.((((((((.((((.(((((.&))))))))))))))).)).	3449	3468	1	-17.6	1	0.000193588	0.662	5.40281	5.54304	-5.77128	17	19	15	3UTR		0	0
hsa-miR-10525-3p	NM_001330264	TYRO3	(((((..((.(((((((((..&)))))))))...))..))))).	3317	3339	1	-19.6	1	0.00335396	0.574	0.415267	0.547855	-8.62473	16	22	9	3UTR		0	0
hsa-miR-10525-3p	NM_001330295	TIMELESS	(((((.(((.(((((((....&))))))))))))))).	3845	3861	1	-19.1	1	0.00353782	0.559	5.18408	4.16969	-7.08104	15	16	15	3UTR		0	0
hsa-miR-10525-3p	NM_001330310	EPB41L5	((((((((((.(...((((..&))))).)))))))))).	5059	5076	1	-18.4	1	0.00419346	0.559	-0.479364	-0.157203	-9.64377	15	17	10	3UTR		0	0
hsa-miR-10525-3p	NM_001330483	TRIM62	(((((((((((((........&.))))))))))))).	1741	1804	1	-18.1	1	0.0149155	0.441	-0.308527	1.03196	-5.76291	13	15	13	3UTR		0	0
hsa-miR-10525-3p	NM_001330578	ATP7B	.(((((((..((((((((((.&)))))))))).................))))))).	4739	4774	1	-21.9	1	0.028966	0.544	5.6638	2.71698	-6.09222	17	35	10	3UTR		0	0
hsa-miR-10525-3p	NM_001330579	ATP7B	.(((((((..((((((((((.&)))))))))).................))))))).	4721	4756	1	-21.9	1	0.028966	0.544	5.6638	2.71698	-6.09222	17	35	10	3UTR		0	0
hsa-miR-10525-3p	NM_001330616	AK4	......((((((((((((.((&)).)))))))))))).	2550	2566	1	-20.7	0	0.0106333	0.574	0.0353154	0.179574	-15.5666	14	16	12	3UTR		0	0
hsa-miR-10525-3p	NM_001330635	LRRC7	.(((.(((((((.((((((..&)))))).)))))))))).	23023	23041	1	-20.4	1	0.00316791	0.515	-0.105094	-0.0708772	-9.20149	16	18	10	3UTR		0	0
hsa-miR-10525-3p	NM_001330635	LRRC7	.(((((((((((((((((...&))))))))))))..........))))).	15781	15809	1	-18.1	1	0.00761779	0.794	0.00882416	0.130199	-3.79332	17	28	12	3UTR		0	0
hsa-miR-10525-3p	NM_001330677	TBX15	((((((....((((.((((((&)))))))))))))))).	3320	3337	1	-18.6	1	0.00117097	0.426	4.11435	4.87296	-10.8292	16	17	16	3UTR		0	0
hsa-miR-10525-3p	NM_001330691	CEP78	(((((((...(.((((((...&))))))).))))))).	3973	3989	1	-17.5	1	0.00140801	0.676	0.0113892	0.171735	-11.8969	14	16	7	3UTR		0	0
hsa-miR-10525-3p	NM_001330693	CEP78	(((((((...(.((((((...&))))))).))))))).	3925	3941	1	-17.5	1	0.00140801	0.676	0.0113892	0.171735	-11.8969	14	16	7	3UTR		0	0
hsa-miR-10525-3p	NM_001330698	YTHDC1	((((((((((((((..((...&.))..)))))..))))))))).	5544	5578	1	-18.9	1	0.00203878	0.5	2.26051	2.66604	-4.90607	16	22	9	3UTR		0	0
hsa-miR-10525-3p	NM_001331007	SMG7	((((((.((.(((((((((..&.))))))))).)))))))).	4186	4218	1	-23.8	1	0.0054513	0.515	2.73484	2.50712	-6.72377	17	20	9	3UTR		0	0
hsa-miR-10525-3p	NM_001346460	CEP83	.(((.(((.((((((((((..&)))))))..))).)))))).	2537	2557	1	-18.9	1	9.16797e-05	0.544	1.56815	1.13255	-8.96875	16	20	7	3UTR		0	0
hsa-miR-10525-3p	NM_001346516	LCOR	(((((((((((((((((((..&))))))))).........)))).)))))).	13821	13851	1	-21.2	1	0.000856133	0.603	1.04334	1.11825	-3.93757	19	30	9	3UTR		0	0
hsa-miR-10525-3p	NM_001346516	LCOR	.......(((((((((((((.&)))))))).))))).	15097	15112	1	-18.5	0	0.000495468	0.559	2.10734	1.16311	-17.1102	13	15	8	3UTR		0	0
hsa-miR-10525-3p	NM_001346767	MYO18A	..(((((((((((..(((...&.)))..))))))))))).	9245	9277	1	-20.1	1	0.0197957	0.5	2.94067	3.44851	-6.54929	14	18	11	3UTR		0	0
hsa-miR-10525-3p	NM_001346949	EXO5	...((((((((.(((.(((..&))).))).)))))))).	1721	1738	1	-18.6	1	0.0014738	0.588	-0.0597776	0.300815	-10.0944	14	17	8	3UTR		0	0
hsa-miR-10525-3p	NM_001347723	DYRK1A	......((.((((((((((..&)))))))))).)).	9335	9349	1	-19.6	0	0.000789074	0.559	0	0	-16.6229	12	14	10	3UTR		0	1
hsa-miR-10525-3p	NM_001348233	OR6J1	..((.((((((((((((((((&))))))))))))))))..)).	1788	1809	1	-21.8	1	0.00320739	0.662	0	0	-9.07604	18	21	16	3UTR		0	0
hsa-miR-10525-3p	NM_001348278	ZNF141	...((((((.((((.((....&)))))))))))).	2275	2288	1	-16.2	1	6.84639e-05	0.5	0.282977	-0.0152912	-8.4925	12	13	12	3UTR		0	0
hsa-miR-10525-3p	NM_001348430	ZNF148	((((((((.((.((((((...&))))))))..))).))))).	5733	5753	1	-18.4	1	4.19145e-05	0.485	4.15232	2.76238	-8.34077	16	20	8	3UTR		0	1
hsa-miR-10525-3p	NM_001348431	ZNF148	((((((((.((.((((((...&))))))))..))).))))).	5731	5751	1	-18.4	1	4.19145e-05	0.485	3.54993	2.78002	-8.34077	16	20	8	3UTR		0	1
hsa-miR-10525-3p	NM_001348440	AP3B2	.((((...(((((((((((((&)))))))))))))...)))).	753	774	1	-22.1	1	0.0171068	0.588	0.542297	0.441806	-9.55161	17	21	13	3UTR		0	0
hsa-miR-10525-3p	NM_001348652	ANKRD9	...((((((((((((((((..&))))))))))))....)))).	1586	1607	1	-20.4	1	3.50204e-05	0.397	-0.26301	-0.177534	-6.51454	16	21	12	3UTR		0	0
hsa-miR-10525-3p	NM_001348800	ZBTB20	...((((((((.((((((((.&)))))))))))))))).	5971	5988	1	-22.2	1	8.16524e-06	0.574	0.867689	2.23189	-9.86134	16	17	16	3UTR		0	0
hsa-miR-10525-3p	NM_001348800	ZBTB20	(((((((((((((((((((..&))))...))))))......))))))))).	24999	25028	1	-21.1	1	0.00130316	0.603	5.21627	5.526	-3.93757	19	29	9	3UTR		0	0
hsa-miR-10525-3p	NM_001348985	ABCG2	(((...(((((((((((((..&)))))))))))))...))).	3485	3505	1	-23	1	0.000708728	0.632	2.35545	3.69497	-12.9896	16	20	13	3UTR		0	0
hsa-miR-10525-3p	NM_001349180	XYLB	(((((.((((((((.(((...&.)))...))))))))...))))).	478	524	1	-20.5	1	0.0169107	0.456	0.270159	-0.0522811	-6.57398	16	24	8	3UTR		0	0
hsa-miR-10525-3p	NM_001349547	ARHGAP26	..((((.((.((((((((((.&)))))))))).)).)))).	4249	4268	1	-21	1	0.00124452	0.574	1.9767	0.610252	-7.74319	16	19	10	3UTR		0	0
hsa-miR-10525-3p	NM_001349547	ARHGAP26	(.(((((((((.((.((((..&)))).)).))))))))).).	4574	4594	1	-17.7	1	0.00507805	0.603	-0.67883	0.0421452	-9.1835	16	20	9	3UTR		0	0
hsa-miR-10525-3p	NM_001350853	FTCDNL1	(((((((((((((.((((...&))))))))))...))))))).	1600	1621	1	-18.1	1	0.00213815	0.676	1.1267	0.705082	-4.79441	17	21	10	3UTR		0	0
hsa-miR-10525-3p	NM_001351054	TRIM2	((((((((((((((.(((...&))))))))))))))))).	3587	3605	1	-20.1	1	0.0249193	0.676	2.54984	2.44681	-4.67302	17	18	17	3UTR		0	0
hsa-miR-10525-3p	NM_001351055	TRIM2	((((((((((((((.(((...&))))))))))))))))).	3584	3602	1	-20.1	1	0.0249193	0.676	2.54984	2.44681	-4.67302	17	18	17	3UTR		0	0
hsa-miR-10525-3p	NM_001351056	TRIM2	((((((((((((((.(((...&))))))))))))))))).	3634	3652	1	-20.1	1	0.0249193	0.676	2.54984	2.44681	-4.67302	17	18	17	3UTR		0	0
hsa-miR-10525-3p	NM_001351063	KLRD1	(((.((((((((((((((((.&)))))))))...))))))).))).	2432	2456	1	-24	1	9.65872e-05	0.574	-0.150201	0.0261803	-6.9696	19	24	9	3UTR		0	0
hsa-miR-10525-3p	NM_001351063	KLRD1	.(((((...(((((.((((((&)))))))))))...))))).	12304	12324	1	-20.8	1	0.0019349	0.544	0.0863358	0.0917567	-9.44249	16	20	11	3UTR		0	0
hsa-miR-10525-3p	NM_001351237	SMUG1	.((((((((((.((((((...&)))))).)))..))))))).	816	836	1	-21.6	1	0.0444873	0.529	0.0696115	0.477557	-7.14013	16	20	7	3UTR		0	0
hsa-miR-10525-3p	NM_001351267	TSPAN14	..((((.((((((((((((..&))).))))))))).)))).	2563	2582	1	-18.9	1	0.00032212	0.574	0.509817	0.277668	-6.50069	16	19	9	3UTR		0	0
hsa-miR-10525-3p	NM_001351270	TSPAN14	..((((.((((((((((((..&))).))))))))).)))).	2761	2780	1	-18.9	1	0.00032212	0.574	0.509817	0.277668	-6.50069	16	19	9	3UTR		0	0
hsa-miR-10525-3p	NM_001351472	ELAVL2	((((((((..(((((((((((&)))))).))))).........)))))))).	3295	3325	1	-18.9	1	0.0101354	0.618	6.14107	5.5429	-6.23647	19	30	8	3UTR		0	0
hsa-miR-10525-3p	NM_001351475	ELAVL2	((((((((..(((((((((((&)))))).))))).........)))))))).	3079	3109	1	-18.9	1	0.0101354	0.618	5.27937	5.46083	-6.23647	19	30	8	3UTR		0	0
hsa-miR-10525-3p	NM_001351777	ZNF320	.(((((.((((((((((((..&))))).).)))))).))))).	4360	4381	1	-18.7	1	0.025289	0.559	-0.336871	-0.484988	-5.33701	17	21	6	3UTR		0	0
hsa-miR-10525-3p	NM_001352027	PHF21A	((((((.((((.((((((...&))))))..)))))))))).	5341	5360	1	-19.2	1	0.000964094	0.5	5.12507	5.18497	-8.82806	16	19	10	3UTR		0	0
hsa-miR-10525-3p	NM_001352680	TMEM18	.(((((((((((((((((...&)))))))..)))))))))).	4131	4151	1	-20.2	1	0.00792577	0.559	0.0517007	-0.0189521	-3.79332	17	20	10	3UTR		0	0
hsa-miR-10525-3p	NM_001352769	ARL17B	..((((((((((((((((((.&)))))))))).....)))))).)).	1328	1353	1	-19	1	0.00448478	0.662	1.1515	1.08057	-4.957	18	25	10	3UTR		0	0
hsa-miR-10525-3p	NM_001353214	DYM	.(((((((.((((((((((..&)))))))))))))).))).	10045	10064	1	-19.8	1	0.0024378	0.735	0.708209	0.622864	-4.84971	17	19	14	3UTR		0	0
hsa-miR-10525-3p	NM_001354435	C4orf54	.....((((((((((((((..&)))))))))...))))).	9460	9478	1	-18.2	1	0.0608216	0.603	0.287636	0.318399	-13.6656	14	18	9	3UTR		0	0
hsa-miR-10525-3p	NM_001354604	MITF	(((((((((((.((.......&)).))))))))))).	2984	2999	1	-16.9	1	9.24459e-05	0.662	1.05624	1.90843	-8.25288	13	15	11	3UTR		0	0
hsa-miR-10525-3p	NM_001354664	OPA1	..(((((((((((((((....&)))))........)))))))))).	6237	6261	1	-19.4	1	0.0180766	0.618	-0.0646571	0.0745516	-4.957	15	24	10	3UTR		0	0
hsa-miR-10525-3p	NM_001354930	RIPK1	(((((((.((..((((((...&)))))).)).))))))).	3460	3478	1	-19	1	0.0106042	0.426	0.0454723	-0.239031	-12.4228	15	18	7	3UTR		0	0
hsa-miR-10525-3p	NM_001356338	B3GALT5	((((((((((..(((((((..&.))))))).....)))))))))).	8830	8870	1	-24.3	1	0.000573371	0.588	-0.318133	0.0114931	-10.1092	17	24	10	3UTR		0	0
hsa-miR-10525-3p	NM_001358351	SEMA6D	.(((((((((.((((((....&))))))))))))..))).	4641	4659	1	-17.5	1	0.00184337	0.632	2.50284	2.38995	-6.6181	15	18	12	3UTR		0	0
hsa-miR-10525-3p	NM_001361041	FRRS1	.((((.((.((((((((((..&)))))))))).))..)))).	4169	4189	1	-20.7	1	1.29212e-05	0.574	-0.297761	0.248478	-6.75067	16	20	10	3UTR		0	0
hsa-miR-10525-3p	NM_001363138	MTDH	(((....((((((((((((((&)))))))))..)))))....))).	3504	3528	1	-19.6	0	0.00103609	0.676	2.26174	2.91811	-14.5333	17	24	9	3UTR		0	0
hsa-miR-10525-3p	NM_001363597	POLD3	(.(((((((((((((((....&.))))))))))))).)).).	3024	3050	1	-18.5	1	0.00624718	0.559	0.496402	0.577185	-5.10125	16	20	13	3UTR		0	0
hsa-miR-10525-3p	NM_001363603	BICD1	....(((.((((((((((((.&)))))))))))).))).	3154	3171	1	-17.7	1	0.00130541	0.588	5.05412	4.07516	-11.8602	15	17	12	3UTR		0	0
hsa-miR-10525-3p	NM_001363713	ZNF346	(((((((....((((((((..&)))))))))))).))).	2560	2577	1	-16.7	1	0.00099868	0.471	0.398276	0.103145	-11.3749	15	17	12	3UTR		0	0
hsa-miR-10525-3p	NM_001363725	ARID1B	.(((((((((((((.(((((.&)))))))))))))))))).	6887	6906	1	-24.4	1	0.00299024	0.603	0.243416	0.786751	-4.52877	18	19	18	3UTR		0	0
hsa-miR-10525-3p	NM_001363731	TM9SF4	.(((((.((.((((((((((.&)))))))))).))))))).	2524	2543	1	-20.8	1	0.0143457	0.676	0.582167	0.976369	-6.57952	17	19	10	3UTR		0	0
hsa-miR-10525-3p	NM_001363804	GSTT2B	((..((((((((((((((((.&))))))))).))).))))..)).	928	951	1	-21.1	1	0.0015763	0.588	-0.274838	0.204967	-8.52714	18	23	9	3UTR		0	0
hsa-miR-10525-3p	NM_001363818	MTX3	(((((((((((((((.((...&)).)))))))))..)))))).	1924	1945	1	-19.2	1	0.00160579	0.706	-0.0658818	0.250785	-4.17062	17	21	9	3UTR		0	0
hsa-miR-10525-3p	NM_001363876	TMEM45A	..(((((((((((((..((((&.))))))))))))))))).	1470	1512	1	-22	1	0.000835194	0.603	0.689308	0.336529	-5.19005	17	19	17	3UTR		0	0
hsa-miR-10525-3p	NM_001363953	RAB6B	((.((((((((((((((((((&)))))))))...........))))))))))).	3955	3987	1	-19.7	1	0.0053676	0.529	0.130735	0.14551	-5.49511	20	32	11	3UTR		0	0
hsa-miR-10525-3p	NM_001364303	OXCT1	(((((((.((...(((((((.&))))))))).))))))).	2357	2375	1	-17.1	1	0.000271291	0.676	0.907933	3.4313	-13.7119	16	18	9	3UTR		0	0
hsa-miR-10525-3p	NM_001365045	ADAR	((((((((.(((((.......&))))))))))))).	3973	3987	1	-17.2	1	0.267004	0.603	1.77594	2.42613	-5.96246	13	14	13	3UTR		0	1
hsa-miR-10525-3p	NM_001365048	ADAR	((((((((.(((((.......&))))))))))))).	3976	3990	1	-17.2	1	0.267004	0.603	1.59377	2.37288	-5.96246	13	14	13	3UTR		0	1
hsa-miR-10525-3p	NM_001365088	SLC12A6	((.(((.(((((((.(((...&))))))))))))))).	5002	5018	1	-18	1	0.00364105	0.559	5.61134	4.74459	-7.77425	15	16	15	3UTR		0	0
hsa-miR-10525-3p	NM_001365933	NLGN1	(((((((((((((((......&)))...)))))))))))).	11587	11606	1	-18.9	1	0.00154952	0.676	0.0168625	-0.0140241	-4.17062	15	19	12	3UTR		0	0
hsa-miR-10525-3p	NM_001366218	DLG1	.((((((((((((........&.)))))))))))).	3444	3463	1	-19	1	0.0105825	0.588	2.3373	2.92054	-5.61866	12	14	12	3UTR		0	0
hsa-miR-10525-3p	NM_001366737	GCNT4	((((((....(((((((.((.&.)).)))))))....)))))).	2266	2295	1	-18.5	1	0.00101055	0.515	0.501557	0.0815202	-10.0938	15	22	7	3UTR		0	0
hsa-miR-10525-3p	NM_001367620	TTLL9	(((((..(((((((((((...&.))))))))..)))..))))).	1780	1811	1	-20.1	1	0.00563107	0.544	0.0283698	0.0356337	-7.38222	16	22	8	3UTR		0	0
hsa-miR-10525-3p	NM_001367774	BCLAF3	....((((((((((((((((.&))))).........))))))))))).	2850	2876	1	-18.9	1	0.015637	0.691	0.179605	0.194175	-9.54656	16	26	11	3UTR		0	0
hsa-miR-10525-3p	NM_001367909	ZNF678	.(((...((((((((((((..&))))....))))))))....))).	8332	8356	1	-19.5	1	0.0706871	0.603	-0.0419156	0.0536915	-11.357	15	24	8	3UTR		0	0
hsa-miR-10525-3p	NM_001369461	NFIB	(((((((..(((.((((((..&))))))))).))))))).	8175	8193	1	-19.7	1	4.97566e-05	0.588	2.26214	2.87546	-8.59673	16	18	9	3UTR		0	0
hsa-miR-10525-3p	NM_001369464	NFIB	(((((((..(((.((((((..&))))))))).))))))).	7953	7971	1	-19.7	1	4.97566e-05	0.588	2.26214	2.87546	-8.59673	16	18	9	3UTR		0	0
hsa-miR-10525-3p	NM_001369687	KIAA0895L	((.(((((((((((.((....&.)).))))))))))).)).	2211	2258	1	-20.7	1	0.00941532	0.324	0.278811	1.84128	-6.23056	15	19	11	3UTR		0	0
hsa-miR-10525-3p	NM_001370076	MIOS	(((((((((.(.(((((((..&))))))).).)))))).))).	3000	3021	1	-19.6	1	0.00662727	0.574	1.59131	1.26899	-8.52688	17	21	7	3UTR		0	0
hsa-miR-10525-3p	NM_001370182	LOC102724488	.(((((((((((((..(((..&)))..)))).))))))))).	6987	7007	1	-17.9	1	0.00362079	0.441	0.259032	-0.0766724	-4.76182	16	20	9	3UTR		0	0
hsa-miR-10525-3p	NM_001370465	DUSP28	.((((.(((...(((((((((&))))))))).))).)))).	3000	3019	1	-21.6	1	6.96826e-05	0.529	0.400281	0.342232	-13.1084	16	19	9	3UTR		0	0
hsa-miR-10525-3p	NM_001370486	KCTD16	......(((((((((((((..&)))))))).))))).	13625	13640	1	-18.8	0	3.8895e-05	0.691	1.52601	1.58296	-15.5666	13	15	8	3UTR		0	0
hsa-miR-10525-3p	NM_001370785	LRRC7	.(((.(((((((.((((((..&)))))).)))))))))).	23087	23105	1	-20.4	1	0.00316791	0.515	-0.105094	-0.0708772	-9.20149	16	18	10	3UTR		0	0
hsa-miR-10525-3p	NM_001370785	LRRC7	.(((((((((((((((((...&))))))))))))..........))))).	15845	15873	1	-18.1	1	0.00761779	0.794	0.00882416	0.130199	-3.79332	17	28	12	3UTR		0	0
hsa-miR-10525-3p	NM_001371242	CRYBG1	(.(((((((((((((((....&))))..))))))))))).).	9283	9303	1	-19.1	1	0.000155268	0.588	-0.297688	-0.08153	-5.10125	16	20	11	3UTR		0	0
hsa-miR-10525-3p	NM_001371246	SCN2A	(((((.((((((.(((((((.&))))))).)))))).))))).	7912	7933	1	-25.5	1	0.000316629	0.647	3.66769	3.60734	-7.12766	18	21	7	3UTR		0	0
hsa-miR-10525-3p	NM_001371247	SCN2A	(((((.((((((.(((((((.&))))))).)))))).))))).	7740	7761	1	-25.5	1	0.000316629	0.647	3.66769	3.60734	-7.12766	18	21	7	3UTR		0	0
hsa-miR-10525-3p	NM_001371364	DUS4L-BCAP29	.(((((.((((((((......&.)))))))).))))).	2468	2490	1	-17.7	1	0.036557	0.765	0.211004	0.538281	-5.57006	13	16	8	3UTR		0	0
hsa-miR-10525-3p	NM_001371365	DUS4L-BCAP29	.(((((.((((((((......&.)))))))).))))).	2427	2449	1	-17.7	1	0.036557	0.765	0.211004	0.538281	-5.57006	13	16	8	3UTR		0	0
hsa-miR-10525-3p	NM_001371438	AGPAT1	......(((((((((((((((&))))))))).))).))).	1737	1755	1	-18.2	0	0.00438695	0.426	1.91755	2.77598	-15.5666	15	18	9	3UTR		0	0
hsa-miR-10525-3p	NM_001371656	ARID1B	.(((((((((((((.(((((.&)))))))))))))))))).	9797	9816	1	-24.4	1	0.00299024	0.603	0.243416	0.786751	-4.52877	18	19	18	3UTR		0	0
hsa-miR-10525-3p	NM_001372081	SPATS1	...(((((((((((((.....&.))))))))))))).	3995	4029	1	-20.1	1	0.00714344	0.574	0.290475	-0.127097	-6.51454	13	15	13	3UTR		0	0
hsa-miR-10525-3p	NM_001374442	DYM	.(((((((.((((((((((..&)))))))))))))).))).	9310	9329	1	-19.8	1	0.0024378	0.735	0.708209	0.622864	-4.84971	17	19	14	3UTR		0	0
hsa-miR-10525-3p	NM_001374769	SIM1	.((((..((.((((((((((.&)))))))))).)))))).	6279	6297	1	-18.5	1	0.00159849	0.574	1.80525	3.35236	-8.48048	16	18	10	3UTR		0	0
hsa-miR-10525-3p	NM_001374820	ARID1B	.(((((((((((((.(((((.&)))))))))))))))))).	9180	9199	1	-24.4	1	0.00299024	0.603	0.243416	0.786751	-4.52877	18	19	18	3UTR		0	0
hsa-miR-10525-3p	NM_001374828	ARID1B	.(((((((((((((.(((((.&)))))))))))))))))).	9300	9319	1	-24.4	1	0.00299024	0.603	0.243416	0.786751	-4.52877	18	19	18	3UTR		0	0
hsa-miR-10525-3p	NM_001374846	NDRG1	.(((((((((((.((......&)).))))))))))).	1990	2005	1	-17.3	1	0.0015865	0.603	5.01161	5.26282	-5.3155	13	15	11	3UTR		0	0
hsa-miR-10525-3p	NM_001375	DNASE2	((((((((((.(.(.((((..&)))))).)))))))))).	1362	1380	1	-19.8	1	0.000122891	0.5	0.37993	1.90112	-8.78693	16	18	10	3UTR		0	0
hsa-miR-10525-3p	NM_001375488	TRIM2	((((((((((((((.(((...&))))))))))))))))).	3557	3575	1	-20.1	1	0.0249193	0.676	2.54984	2.44681	-4.67302	17	18	17	3UTR		0	0
hsa-miR-10525-3p	NM_001375489	TRIM2	((((((((((((((.(((...&))))))))))))))))).	3554	3572	1	-20.1	1	0.0249193	0.676	2.54984	2.44681	-4.67302	17	18	17	3UTR		0	0
hsa-miR-10525-3p	NM_001375490	TRIM2	((((((((((((((.(((...&))))))))))))))))).	3407	3425	1	-20.1	1	0.0249193	0.676	2.54984	2.44681	-4.67302	17	18	17	3UTR		0	0
hsa-miR-10525-3p	NM_001375491	TRIM2	((((((((((((((.(((...&))))))))))))))))).	3404	3422	1	-20.1	1	0.0249193	0.676	2.54984	2.44681	-4.67302	17	18	17	3UTR		0	0
hsa-miR-10525-3p	NM_001375512	TRIM2	((((((((((((((.(((...&))))))))))))))))).	4258	4276	1	-20.1	1	0.0249193	0.676	2.54984	2.44681	-4.67302	17	18	17	3UTR		0	0
hsa-miR-10525-3p	NM_001375513	TRIM2	((((((((((((((.(((...&))))))))))))))))).	3622	3640	1	-20.1	1	0.0249193	0.676	2.54984	2.44681	-4.67302	17	18	17	3UTR		0	0
hsa-miR-10525-3p	NM_001375514	TRIM2	((((((((((((((.(((...&))))))))))))))))).	3627	3645	1	-20.1	1	0.0249193	0.676	2.54984	2.44681	-4.67302	17	18	17	3UTR		0	0
hsa-miR-10525-3p	NM_001375515	TRIM2	((((((((((((((.(((...&))))))))))))))))).	3539	3557	1	-20.1	1	0.0249193	0.676	2.54984	2.44681	-4.67302	17	18	17	3UTR		0	0
hsa-miR-10525-3p	NM_001375516	TRIM2	((((((((((((((.(((...&))))))))))))))))).	3549	3567	1	-20.1	1	0.0249193	0.676	2.54984	2.44681	-4.67302	17	18	17	3UTR		0	0
hsa-miR-10525-3p	NM_001375517	TRIM2	((((((((((((((.(((...&))))))))))))))))).	3463	3481	1	-20.1	1	0.0249193	0.676	2.54984	2.44681	-4.67302	17	18	17	3UTR		0	0
hsa-miR-10525-3p	NM_001375519	TRIM2	((((((((((((((.(((...&))))))))))))))))).	3131	3149	1	-20.1	1	0.0249193	0.676	2.54984	2.44681	-4.67302	17	18	17	3UTR		0	0
hsa-miR-10525-3p	NM_001375520	TRIM2	((((((((((((((.(((...&))))))))))))))))).	3128	3146	1	-20.1	1	0.0249193	0.676	2.54984	2.44681	-4.67302	17	18	17	3UTR		0	0
hsa-miR-10525-3p	NM_001375522	TRIM2	((((((((((((((.(((...&))))))))))))))))).	3411	3429	1	-20.1	1	0.0249193	0.676	2.54984	2.44681	-4.67302	17	18	17	3UTR		0	0
hsa-miR-10525-3p	NM_001375525	TRIM2	((((((((((((((.(((...&))))))))))))))))).	3354	3372	1	-20.1	1	0.0249193	0.676	2.54984	2.44681	-4.67302	17	18	17	3UTR		0	0
hsa-miR-10525-3p	NM_001376312	GTDC1	.(((((((((.(((.((((..&)))).))).))))))))).	6213	6232	1	-21.7	1	0.00032373	0.485	0.184883	-0.153372	-7.35355	16	19	9	3UTR		0	0
hsa-miR-10525-3p	NM_001376570	AKAP7	..((((.((((((((((((..&.)))))))....))))))))).	1754	1778	1	-19.5	1	0.0023307	0.676	0.151929	0.816779	-6.50069	16	22	9	3UTR		0	0
hsa-miR-10525-3p	NM_001376820	MBNL1	(((((((.(.(((.(((((..&))))))))).))))))).	3619	3637	1	-18	1	0.00284615	0.574	3.10941	2.81166	-8.35056	16	18	9	3UTR		0	0
hsa-miR-10525-3p	NM_001376833	MBNL1	(((((((.(.(((.(((((..&))))))))).))))))).	3488	3506	1	-18	1	0.00284615	0.574	3.10941	2.81166	-8.35056	16	18	9	3UTR		0	0
hsa-miR-10525-3p	NM_001376836	MBNL1	(((((((.(.(((.(((((..&))))))))).))))))).	3434	3452	1	-18	1	0.00284615	0.574	3.10941	2.81166	-8.35056	16	18	9	3UTR		0	0
hsa-miR-10525-3p	NM_001376914	SEC14L3	((((((((((.((((((....&.))))))))))))).))).	1574	1599	1	-20	1	0.00129277	0.426	3.28515	2.40718	-6.76235	16	19	13	3UTR		0	0
hsa-miR-10525-3p	NM_001377265	MAPT	...(((((.(.((((((((..&)))))))).)))))).	6229	6245	1	-21.5	1	1.89912e-06	0.426	-0.0230457	-0.184776	-10.3957	14	16	8	3UTR		0	0
hsa-miR-10525-3p	NM_001377266	MAPT	...(((((.(.((((((((..&)))))))).)))))).	5938	5954	1	-21.5	1	1.89912e-06	0.426	0.032357	-0.200258	-10.3957	14	16	8	3UTR		0	0
hsa-miR-10525-3p	NM_001377421	HEMK1	((((((((.((((((((((..&))))))).....))))))))))).	9023	9047	1	-23.1	1	0.00410238	0.5	-0.546467	-0.31165	-4.99396	18	24	11	3UTR		0	0
hsa-miR-10525-3p	NM_001377540	SLMAP	((((((((((((((((..(((&.)))..))))).))))))))))).	4951	4983	1	-21	1	0.000895522	0.676	1.93222	1.47785	-3.93757	19	24	11	3UTR		0	0
hsa-miR-10525-3p	NM_001377925	SLMAP	((((((((((((((((..(((&.)))..))))).))))))))))).	4663	4695	1	-21	1	0.000895522	0.676	1.93222	1.47785	-3.93757	19	24	11	3UTR		0	0
hsa-miR-10525-3p	NM_001377958	PTPRD	...((((.((((((((((...&)))))))))))))).	7398	7413	1	-17	1	0.000280904	0.618	4.83668	3.95988	-8.82818	14	15	14	3UTR		0	0
hsa-miR-10525-3p	NM_001379403	WDR26	((((((((((.((((......&)).)).)))))))))).	4455	4472	1	-16.8	1	0.00112857	0.618	3.64786	4.75048	-6.9954	14	17	10	3UTR		0	1
hsa-miR-10525-3p	NM_001380	DOCK1	(((((((((((((((((((..&.)))).))))).)))))))))).	5897	5922	1	-22	1	0.0147963	0.456	-0.741389	-0.271327	-3.93757	19	23	10	3UTR		0	0
hsa-miR-10525-3p	NM_001381866	RCC1	((..((((((((((((.....&))))))))))))..)).	2214	2231	1	-17	1	0.00559192	0.426	-0.740392	0.586498	-8.52714	14	17	12	3UTR		0	0
hsa-miR-10525-3p	NM_001382581	STIM1	.(((((.((((((((.((((.&.)))))))))))).))))).	2154	2190	1	-20.1	1	0.00121359	0.441	0.224976	1.19232	-5.57006	17	20	12	3UTR		0	0
hsa-miR-10525-3p	NM_001382616	PMAIP1	...((((((.((((((((...&)))))))))))))).	604	619	1	-19.8	1	1.21132e-05	0.559	-0.280049	0.0820344	-7.75705	14	15	14	3UTR		0	0
hsa-miR-10525-3p	NM_001384316	ZHX3	...((((((((((((((((..&)))))))........))))))))).	5963	5988	1	-19.8	1	0.114765	0.471	0.666967	0.177637	-6.51454	16	25	9	3UTR		0	0
hsa-miR-10525-3p	NM_001384323	ZHX3	...((((((((((((((((..&)))))))........))))))))).	6416	6441	1	-19.8	1	0.114765	0.471	1.95929	1.27839	-6.51454	16	25	9	3UTR		0	0
hsa-miR-10525-3p	NM_001384882	STAT1	.((((((((((.((((((...&.)))).)))))))))).)).	3085	3116	1	-19.2	1	0.00153552	0.632	3.62119	3.14603	-7.14013	16	20	10	3UTR		0	0
hsa-miR-10525-3p	NM_001384907	ZNF517	((((((.((.((((.(((((.&))))))))).)))))))).	2812	2831	1	-20.5	1	0.00194045	0.426	-0.174677	0.0541921	-7.45922	17	19	9	3UTR		0	0
hsa-miR-10525-3p	NM_001385704	ELAVL2	((((((((..(((((((((((&)))))).))))).........)))))))).	3040	3070	1	-18.9	1	0.0101354	0.618	4.86298	5.70192	-6.23647	19	30	8	3UTR		0	0
hsa-miR-10525-3p	NM_001389	DSCAM	.(((((((((((((((((.((&.)).))))))))))).)))))).	8337	8368	1	-23.7	1	0.000143441	0.544	1.21703	1.28135	-3.79332	19	23	11	3UTR		0	0
hsa-miR-10525-3p	NM_001460	FMO2	..((((((((((((((.....&.)))))))))))).)).	2358	2389	1	-18	1	0.000719278	0.691	0.00873479	-0.0875324	-4.957	14	17	12	3UTR		0	0
hsa-miR-10525-3p	NM_001463	FRZB	.((.(((((((((((......&.))))))))))).)).	1131	1162	1	-17.7	1	0.017817	0.721	0.659713	0.642875	-7.0584	13	16	11	3UTR		0	0
hsa-miR-10525-3p	NM_001480	GALR1	((.(((((.(((.((((((..&))).))).))).))))))).	3166	3186	1	-18.1	1	0.00170165	0.574	0.302567	0.0870016	-7.84063	16	20	7	3UTR		0	0
hsa-miR-10525-3p	NM_001480	GALR1	..(((((((((..((((....&))))..))))))))).	6830	6846	1	-17.7	1	0.029078	0.559	-0.526207	-0.305811	-9.59293	13	16	9	3UTR		0	0
hsa-miR-10525-3p	NM_001488	TADA2A	.(((((((((((.((((((((&)))))))))))))....)))))).	3773	3797	1	-21.3	1	0.00293215	0.559	0	0	-5.08246	19	24	13	3UTR		0	0
hsa-miR-10525-3p	NM_001536	PRMT1	....((((((((((.(((...&.))))))))))))).	1245	1265	1	-19.1	1	9.5269e-05	0.5	2.05475	1.70989	-10.282	13	15	13	3UTR		0	0
hsa-miR-10525-3p	NM_001564	ING2	.((((((.((((((.(((...&.))).)))))).)))))).	1840	1868	1	-19.1	1	0.000318274	0.574	0.501165	0.564445	-6.84241	15	19	6	3UTR		0	0
hsa-miR-10525-3p	NM_001668	ARNT	...(((.(((((((.((((..&)))))))))))))).	4645	4660	1	-17.9	1	0.000302319	0.485	2.38607	1.80107	-8.79368	14	15	14	3UTR		0	0
hsa-miR-10525-3p	NM_001677	ATP1B1	((((((.((((((((((((..&)))))))))).)))))))).	1396	1416	1	-24.6	1	0.00789718	0.662	3.13422	3.53242	-5.48126	18	20	10	3UTR		0	0
hsa-miR-10525-3p	NM_001742	CALCR	((.(((.((((.((((((((.&))))))))))))))))).	2620	2638	1	-16.6	1	7.45869e-05	0.647	3.74952	4.35503	-10.3856	17	18	17	3UTR		0	0
hsa-miR-10525-3p	NM_001812	CENPC	((.(((((((((((((((((.&)))))).))))))))))))).	4218	4239	1	-21	1	0.00713901	0.662	1.38073	0.867073	-5.49511	19	21	13	3UTR		0	0
hsa-miR-10525-3p	NM_001933	DLST	((.(((((((((((.......&.))))))))))))).	2209	2238	1	-19	1	0.0185223	0.441	0.620197	0.0133693	-6.46361	13	15	13	3UTR		0	0
hsa-miR-10525-3p	NM_001962	EFNA5	((.((((((((((.((((...&)))))))))))))).)).	2869	2887	1	-17.5	1	0.00272266	0.662	2.68014	1.91612	-6.35195	16	18	14	3UTR		0	0
hsa-miR-10525-3p	NM_002039	GAB1	...(((((((((.(((.....&))).))))))))).	6132	6146	1	-17.6	1	0.00343275	0.662	0.41404	0.192421	-7.80367	12	14	9	3UTR		0	0
hsa-miR-10525-3p	NM_002130	HMGCS1	...((((((((((((......&.)))))))))))).	4055	4082	1	-16.5	1	0.000693307	0.647	4.09352	4.69736	-6.74759	12	14	12	3UTR		0	0
hsa-miR-10525-3p	NM_002235	KCNA6	.(((((((((..(((((((..&))))))).))))))))).	4987	5005	1	-24.6	1	0.0155131	0.441	0.382128	0.259951	-9.9649	16	18	9	3UTR		0	0
hsa-miR-10525-3p	NM_000043	FAS	.((((((((((.((.......&.)))))))))))).	2950	2998	1	-18.3	1	0.00482139	0.618	-0.540417	-0.0816196	-8.10863	12	14	12	3UTR		0	0
hsa-miR-10525-3p	NM_000053	ATP7B	.(((((((..((((((((((.&)))))))))).................))))))).	4973	5008	1	-21.9	1	0.028966	0.544	5.6638	2.71698	-6.09222	17	35	10	3UTR		0	0
hsa-miR-10525-3p	NM_000129	F13A1	.((((.(((((((((((((..&)))))))).)).))))))).	2952	2972	1	-21.6	1	0.00208579	0.647	3.45719	3.42542	-5.69428	17	20	8	3UTR		0	0
hsa-miR-10525-3p	NM_000135	FANCA	((.(((((..(((((((((..&)))))))))))))).)).	4865	4883	1	-20.7	1	9.19374e-06	0.456	2.11277	1.5388	-7.79401	16	18	14	3UTR		0	0
hsa-miR-10525-3p	NM_000136	FANCC	(((((((((((.(((.(((..&.))).)))))))))))))).	3340	3393	1	-23.9	1	0.000321793	0.559	1.2644	1.96398	-7.51743	17	20	14	3UTR		0	0
hsa-miR-10525-3p	NM_000153	GALC	...(((((((((...((((..&))))))))))))).	2083	2097	1	-16.6	1	0.0144077	0.588	1.91259	3.58698	-9.39596	13	14	13	3UTR		0	0
hsa-miR-10525-3p	NM_000167	GK	(((.((((((((((.......&)))))))))).))).	2466	2481	1	-16.1	1	0.131933	0.618	1.42438	1.09942	-7.9381	13	15	10	3UTR		0	0
hsa-miR-10525-3p	NM_000201	ICAM1	.(((((((((.((((((....&.))))))))))))))).	2748	2786	1	-20.6	1	0.00173375	0.471	0.0120963	-0.0382878	-6.6181	15	17	15	3UTR		0	0
hsa-miR-10525-3p	NM_000248	MITF	(((((((((((.((.......&)).))))))))))).	2660	2675	1	-16.9	1	9.24459e-05	0.662	1.05624	1.90843	-8.25288	13	15	11	3UTR		0	0
hsa-miR-10525-3p	NM_000264	PTCH1	(((((((.((((((((.....&)))))))).))))))).	7893	7910	1	-19.6	1	0.00801945	0.765	1.61563	0.844335	-6.25121	15	17	8	3UTR		0	0
hsa-miR-10525-3p	NM_000267	NF1	(.(((((.(((((((((.(((&.))).))))))))).))))).).	10908	10958	1	-22.4	1	0.0032837	0.632	0.104242	0.346273	-7.41489	18	23	9	3UTR		0	0
hsa-miR-10525-3p	NM_000268	NF2	.((((((.(((((((((((..&)))))....)))))).)))))).	4554	4577	1	-20.3	1	0.0082251	0.559	0.457736	0.514382	-6.10696	17	23	6	3UTR		0	0
hsa-miR-10525-3p	NM_000341	SLC3A1	.((((.(((((.(((((....&)))))))))))))).	2869	2884	1	-16.6	1	0.000475894	0.588	1.22588	1.77303	-9.04109	14	15	14	3UTR		0	0
hsa-miR-10525-3p	NM_000351	STS	((((((.(((((.((((((..&))))))))))))))))).	5869	5887	1	-20.7	1	6.69483e-05	0.441	-0.0403781	0.00196383	-6.77039	17	18	17	3UTR		0	1
hsa-miR-10525-3p	NM_000386	BLMH	.((((((((((..((((((((&))))))))................)))))))))).	2120	2155	1	-18.7	1	0.0166032	0.574	1.17007	2.09831	-8.42926	18	35	10	3UTR		0	0
hsa-miR-10525-3p	NM_000457	HNF4A	((((((((.((..((((....&))))..)))))))))).	1617	1634	1	-18.7	1	1.4095e-06	0.397	0.479678	0.60381	-9.6299	14	17	10	3UTR		0	0
hsa-miR-10525-3p	NM_000529	MC2R	(((((((((...((.(((((.&)))))))))))))))).	3351	3368	1	-18.6	1	0.00798171	0.618	2.13633	2.73806	-12.0871	16	17	16	3UTR		0	0
hsa-miR-10525-3p	NM_000551	VHL	(((((((((((((((((((..&))).)..))))))))))........))))).	1191	1222	1	-19.4	1	0.0211163	0.456	0.560417	0.188157	-3.93757	19	31	10	3UTR		0	0
hsa-miR-10525-3p	NM_000564	IL5RA	(((((((((..(((((.....&.)))))..))))))))).	4437	4484	1	-19.7	1	0.0111803	0.515	1.30418	1.0947	-8.00486	14	18	9	3UTR		0	1
hsa-miR-10525-3p	NM_000636	SOD2	((((...((((.(((((((..&))))))))))).)))).	12367	12384	1	-21.3	1	0.00807581	0.441	0.317428	0.0464251	-14.8481	15	17	11	3UTR		0	0
hsa-miR-10525-3p	NM_000808	GABRA3	.(((((.((((.(((.(((..&.))).))).)))).))))).	1906	1928	1	-20	1	0.0190027	0.471	2.05879	0.990346	-8.91686	15	20	5	3UTR		0	0
hsa-miR-10525-3p	NM_000818	GAD2	..((((((...((((((((..&))))))))..)))))).	2433	2450	1	-16.6	1	0.25129	0.574	0.30164	0.15161	-10.0807	14	17	8	3UTR		0	0
hsa-miR-10525-3p	NM_000828	GRIA3	(((((.(((.((((((((((.&.)))).)))))).)))))))).	3797	3845	1	-20.4	1	0.0997598	0.618	1.19376	2.19075	-7.08104	18	22	8	3UTR		0	0
hsa-miR-10525-3p	NM_000875	IGF1R	...(((((((((((..(....&)..))))))))))).	9342	9357	1	-18.8	1	8.11229e-05	0.559	1.26964	0.967885	-7.48304	12	15	11	3UTR		0	0
hsa-miR-10525-3p	NM_000876	IGF2R	....(((((((((((((((((&))))))....))))))))))).	12907	12929	1	-22.7	1	0.0575492	0.485	0.31339	-0.0788158	-9.54656	17	22	11	3UTR		0	0
hsa-miR-10525-3p	NM_000880	IL7	((((((((..(((((......&))))))))))))).	1181	1195	1	-16.2	1	0.0142792	0.588	1.32806	1.0168	-6.46952	13	14	13	3UTR		0	0
hsa-miR-10525-3p	NM_000960	PTGIR	...((((.((.(((((((...&))))))).)).)))).	1931	1947	1	-20.2	1	0.00227633	0.412	0.124212	1.07033	-11.6529	13	16	7	3UTR		0	0
hsa-miR-10525-3p	NM_001001664	SPOPL	.(((((((((((.(((((((.&))))))).)))..)))))))).	1731	1753	1	-20.2	1	0.0242801	0.706	3.60822	3.62665	-5.08246	18	22	8	3UTR		0	0
hsa-miR-10525-3p	NM_001002254	AWAT2	.(((((.((((.((((((...&.))))))))))))))).	1867	1910	1	-18.6	1	1.89302e-05	0.515	0	0	-8.68381	15	17	15	3UTR		0	0
hsa-miR-10525-3p	NM_001003652	SMAD2	.(((...(..(((((((((((&)))))))))))..)...))).	14191	14212	1	-20.7	1	0.0102027	0.544	0.310417	0.0695478	-13.6559	15	21	11	3UTR		0	0
hsa-miR-10525-3p	NM_001004460	OR10A2	..((((((.(((((.(((.((&.)).)))))))))))))).	1969	1998	1	-20	1	0.0179087	0.618	0	0	-6.74884	16	19	14	3UTR		0	0
hsa-miR-10525-3p	NM_001004470	ST8SIA6	.....((((((((((((((..&)))..))))))))))).	2411	2428	1	-17.3	1	0.0140494	0.676	0.574518	0.6046	-13.6656	14	17	11	3UTR		0	0
hsa-miR-10525-3p	NM_001004711	OR4D9	(.(((((((((.(((((((..&.))))))).))))).)))).).	5214	5242	1	-21.2	1	0.00023537	0.603	0	0	-8.44805	17	22	7	3UTR		0	0
hsa-miR-10525-3p	NM_001004736	OR5K1	....((((((.((((((((..&))))))).).)))))).	2588	2605	1	-17.3	1	0.00132483	0.529	0	0	-12.3713	14	17	7	3UTR		0	0
hsa-miR-10525-3p	NM_001004751	OR51D1	...(((((.(((((((((...&.)))))))))))))).	1913	1953	1	-21.2	1	0.000144251	0.5	0	0	-7.57093	14	16	14	3UTR		0	0
hsa-miR-10525-3p	NM_001004756	OR51M1	.(((((((((((((((((.((&.)).).)))))))))).)))))).	2733	2781	1	-24.7	1	0.00317337	0.471	0	0	-3.79332	19	24	10	3UTR		0	0
hsa-miR-10525-3p	NM_001005197	OR8D4	((((((((..(((((((((((&)))).)))))))..)))))))).	1643	1666	1	-24.6	1	0.00179848	0.647	0	0	-6.23647	19	23	8	3UTR		0	0
hsa-miR-10525-3p	NM_001005243	OR9K2	.(((((((((.(((((.....&.)))))..))))))))).	2377	2401	1	-19.8	1	0.00189936	0.603	0	0	-6.6181	14	18	9	3UTR		0	0
hsa-miR-10525-3p	NM_001005353	AK4	.((((((((((((((((((((&.))))....)))))))).)))))))).	4213	4247	1	-22.1	1	0.00143807	0.559	-0.0754454	-0.1721	-3.79332	20	27	8	3UTR		0	0
hsa-miR-10525-3p	NM_001005353	AK4	......((((((((((((.((&)).)))))))))))).	2883	2899	1	-20.7	0	0.0106333	0.574	0.174569	-0.00907244	-15.5666	14	16	12	3UTR		0	0
hsa-miR-10525-3p	NM_001005505	CACNA2D2	...((((..((.(((((((((&))))))))).)))))).	5152	5169	1	-18.1	1	0.00498865	0.647	2.73098	3.5578	-13.2314	15	17	9	3UTR		0	0
hsa-miR-10525-3p	NM_001005746	CACNB4	...(((((.((((((((((..&))).)))))))))))).	7853	7870	1	-18	1	0.00318709	0.706	2.12614	2.33402	-7.57093	15	17	12	3UTR		0	0
hsa-miR-10525-3p	NM_001005747	CACNB4	...(((((.((((((((((..&))).)))))))))))).	7956	7973	1	-18	1	0.00318709	0.706	2.2916	2.46981	-7.57093	15	17	12	3UTR		0	0
hsa-miR-10525-3p	NM_001005753	CHMP3	.((((...((((((((((.(.&.).))))))))))...)))).	1291	1341	1	-20.8	1	0.0008744	0.485	0.0677605	-0.108724	-9.55161	15	21	10	3UTR		0	0
hsa-miR-10525-3p	NM_001005914	SEMA3B	(((((.((((((((.((....&))))))))))..))))).	2534	2552	1	-18	1	0.000404421	0.338	0.772537	0.333993	-6.57398	15	18	10	3UTR		0	0
hsa-miR-10525-3p	NM_001005918	ATP7B	.(((((((..((((((((((.&)))))))))).................))))))).	4352	4387	1	-21.9	1	0.028966	0.544	5.6638	2.71698	-6.09222	17	35	10	3UTR		0	0
hsa-miR-10525-3p	NM_001008405	BCAP29	.(((((.((((((((......&.)))))))).))))).	1469	1491	1	-17.7	1	0.036557	0.765	0.211004	0.538281	-5.57006	13	16	8	3UTR		0	0
hsa-miR-10525-3p	NM_001008409	TTLL9	(((((..(((((((((((...&.))))))))..)))..))))).	2329	2360	1	-20.1	1	0.00563107	0.544	0.0283698	0.0356337	-7.38222	16	22	8	3UTR		0	0
hsa-miR-10525-3p	NM_001008727	ZNF121	......(((((.(((((((..&)))))))))))).	1768	1781	1	-19.3	0	0.00537071	0.559	-0.175495	0.113629	-18.9134	12	13	12	3UTR		0	0
hsa-miR-10525-3p	NM_001009899	USF3	(((((((.((((((((((((.&)))).)..))))))).))))))).	12614	12638	1	-18.9	1	0.00193713	0.647	3.15586	1.95779	-6.25121	19	24	7	3UTR		0	0
hsa-miR-10525-3p	NM_001010880	ZNF780A	.(((...((((((((((((((&))))))))))))))....))).	3280	3302	1	-23.8	1	0.00821584	0.618	0.218898	0.295457	-11.357	17	22	14	3UTR		0	0
hsa-miR-10525-3p	NM_001010915	HACD4	(.((((.(((.(((.((((..&)))).))).))))))).).	5927	5946	1	-18.7	1	0.000628535	0.559	0.0470963	-0.0335148	-10.2052	15	19	7	3UTR		0	0
hsa-miR-10525-3p	NM_001011513	PDLIM5	(((((((((.((.(((((...&))))))).))))))))).	3571	3589	1	-17.3	1	0.00412466	0.559	0.417192	0.206644	-6.46921	16	18	9	3UTR		0	0
hsa-miR-10525-3p	NM_001011546	DSTN	.(((((((((((((((((.((&.)).).))))))))))).))))).	2097	2131	1	-24.7	1	0.000136222	0.456	0.107962	0.0688214	-3.79332	19	24	11	3UTR		0	0
hsa-miR-10525-3p	NM_001011666	CREB5	((((((((((.((((((....&.))))))))))))).))).	2504	2529	1	-19.7	1	7.94793e-05	0.471	-0.301686	0.080031	-6.76235	16	19	13	3UTR		0	0
hsa-miR-10525-3p	NM_001011666	CREB5	.(((...((((((((((....&)))))))))).....))).	6230	6249	1	-19.5	1	0.00113282	0.5	0.372337	1.79741	-11.357	13	19	10	3UTR		0	0
hsa-miR-10525-3p	NM_001011713	NAA30	(((((.(((((((((((....&.))).)))))))).))))).	4137	4164	1	-19	1	0.0083436	0.691	1.60577	2.06339	-5.83853	16	20	8	3UTR		0	0
hsa-miR-10525-3p	NM_001011718	XKR7	.(((((((....((.((((..&))))))....))))))).	4242	4260	1	-18.6	1	2.67942e-05	0.382	0.225442	-0.154228	-12.9992	13	18	7	3UTR		0	0
hsa-miR-10525-3p	NM_001012279	SOGA3	(((((.(((((((((((((((&)))).....))))).))))))))))).	5481	5508	1	-20	1	0.0002424	0.603	1.67967	2.35545	-5.83853	20	27	11	3UTR		0	0
hsa-miR-10525-3p	NM_001012279	SOGA3	..(((.(((((((((((((..&))))).))))))))...))).	5143	5164	1	-19.7	1	0.00292568	0.603	1.36202	0.806872	-6.85796	16	21	8	3UTR		0	0
hsa-miR-10525-3p	NM_001012428	ASB11	.(((((((..(.(((((((..&))))))))))))))).	2639	2655	1	-19.3	1	8.51778e-05	0.426	0	0	-9.43902	15	16	15	3UTR		0	0
hsa-miR-10525-3p	NM_001012454	FAM71F2	.(((((((((((((((((.((&.)).).)))))))))).)))))).	4602	4636	1	-23.9	1	0.000339279	0.441	-0.118155	0.0413196	-3.79332	19	24	10	3UTR		0	0
hsa-miR-10525-3p	NM_001012994	SNX30	(((((.((((((((.((((..&))))..)))))))).))))).	3066	3087	1	-23.4	1	0.133256	0.471	-0.255395	-0.145885	-6.57398	17	21	8	3UTR		0	0
hsa-miR-10525-3p	NM_001013647	FAM227A	((((((.((((((..((((..&))))..)))))))))))).	2990	3009	1	-19.1	1	0.00121735	0.647	0.181798	-0.0209558	-7.07355	16	19	12	3UTR		0	0
hsa-miR-10525-3p	NM_001013657	GDPGP1	.(((((((((((((((((...&.))))))))))).)))))).	4623	4673	1	-27.4	1	0.00220305	0.485	0.123858	-0.313528	-3.79332	17	20	11	3UTR		0	0
hsa-miR-10525-3p	NM_001013732	PTCHD4	((((((((..((((.((((((&.))))))))))..)))))))).	3698	3749	1	-19.5	1	0.00116986	0.647	0.597259	0.131344	-6.97192	18	22	10	3UTR		0	0
hsa-miR-10525-3p	NM_001013746	ZNF107	(((((((((.(((..((((..&))))..))).))))))))).	5701	5721	1	-17.6	1	0.00519019	0.765	0.274943	0.0150228	-6.77237	16	20	9	3UTR		0	0
hsa-miR-10525-3p	NM_001017363	ARID3C	((.(((.((((((.((((((.&))))))))))))))).)).	1680	1699	1	-19.9	1	0.00982422	0.5	0.174095	1.58299	-7.89564	17	19	15	3UTR		0	0
hsa-miR-10525-3p	NM_001017371	SP3	(((.((((.((((((((((..&))))))))))....)))).))).	6251	6274	1	-21.2	1	0.00923298	0.588	0.312971	0.209936	-8.02599	17	23	10	3UTR		0	0
hsa-miR-10525-3p	NM_001017922	ERMAP	...((.((((((((.((((..&)))).)))))))).)).	2376	2393	1	-20.3	1	0.00118349	0.5	-0.189969	0.0800964	-9.15095	14	17	8	3UTR		0	0
hsa-miR-10525-3p	NM_001018000	KAZN	.(((((((((..(((((((..&))).)))).....))))))))).	2606	2629	1	-20.9	1	0.000411257	0.5	0.193044	0.044813	-9.9649	16	23	9	3UTR		0	0
hsa-miR-10525-3p	NM_001018000	KAZN	...((((.((((((((((...&)))))))))))))).	1527	1542	1	-18.7	1	1.12139e-06	0.279	1.05977	1.50206	-8.82818	14	15	14	3UTR		0	0
hsa-miR-10525-3p	NM_001018001	KAZN	...((((.((((((((((...&)))))))))))))).	1413	1428	1	-18.7	1	1.12139e-06	0.279	1.34885	0.415135	-8.82818	14	15	14	3UTR		0	0
hsa-miR-10525-3p	NM_001018067	SERBP1	......((.(((((((((((.&))))))))))))).	4474	4488	1	-17.9	0	0.045629	0.662	0.615611	0.389201	-16.6229	13	14	13	3UTR		0	0
hsa-miR-10525-3p	NM_001018068	SERBP1	......((.(((((((((((.&))))))))))))).	4456	4470	1	-17.9	0	0.045629	0.662	0.257151	0.485845	-16.6229	13	14	13	3UTR		0	0
hsa-miR-10525-3p	NM_001018069	SERBP1	......((.(((((((((((.&))))))))))))).	4429	4443	1	-17.9	0	0.045629	0.662	0.995158	0.455886	-16.6229	13	14	13	3UTR		0	0
hsa-miR-10525-3p	NM_001024808	BCL7A	..(((..((((((((((....&))))))))))..))).	2362	2378	1	-17.5	1	0.000374229	0.544	2.11248	0.504403	-8.40165	13	16	10	3UTR		0	0
hsa-miR-10525-3p	NM_001024938	SLC2A11	(.(((((((((((((((((..&)))))))...))).))).)))).).	1665	1690	1	-18.5	1	0.00138839	0.529	0.360231	0.0227379	-5.10125	18	25	7	3UTR		0	0
hsa-miR-10525-3p	NM_001024939	SLC2A11	(.(((((((((((((((((..&)))))))...))).))).)))).).	1762	1787	1	-18.5	1	0.00138839	0.529	0.360231	0.0227379	-5.10125	18	25	7	3UTR		0	0
hsa-miR-10525-3p	NM_001025070	RPS14	.((((((..(((((.((((..&))))))))))))))).	1996	2012	1	-18	1	0.00122315	0.544	6.15244	5.47039	-7.8988	15	16	15	3UTR		0	0
hsa-miR-10525-3p	NM_001025071	RPS14	.((((((..(((((.((((..&))))))))))))))).	2002	2018	1	-18	1	0.00122315	0.544	5.84998	5.71538	-7.8988	15	16	15	3UTR		0	0
hsa-miR-10525-3p	NM_001025107	ADAR	((((((((.(((((.......&))))))))))))).	4046	4060	1	-17.2	1	0.267004	0.603	4.70461	4.07544	-5.96246	13	14	13	3UTR		0	1
hsa-miR-10525-3p	NM_001029864	KIAA1755	...(((((((.((((((....&))))))))))))).	4615	4629	1	-18.5	1	0.00108042	0.485	1.30147	1.04015	-9.33931	13	14	13	3UTR		0	0
hsa-miR-10525-3p	NM_001030003	HNF4A	((((((((.((..((((....&))))..)))))))))).	1493	1510	1	-18.7	1	1.4095e-06	0.397	0.479678	0.60381	-9.6299	14	17	10	3UTR		0	0
hsa-miR-10525-3p	NM_001031	RPS28	...((((((((((((((.((.&.)).)))..))))))))))).	1129	1158	1	-19.8	1	0.000668297	0.647	-0.0137096	0.021355	-6.51454	16	21	11	3UTR		0	0
hsa-miR-10525-3p	NM_001031701	NT5DC3	...(((((((..(((((((..&)))))))..))))))).	4127	4144	1	-20.7	1	0.00119341	0.632	-0.0753701	-0.028407	-12.6861	14	17	7	3UTR		0	0
hsa-miR-10525-3p	NM_001031723	DNAJB14	...((((((...((((((((.&)))))))))))))).	4008	4023	1	-19.1	1	0.00057346	0.574	1.0369	0.997942	-13.9286	14	15	14	3UTR		0	0
hsa-miR-10525-3p	NM_001031732	YTHDC1	((((((((((((((..((...&.))..)))))..))))))))).	5520	5554	1	-18.9	1	0.00203878	0.5	2.27963	2.77025	-4.90607	16	22	9	3UTR		0	0
hsa-miR-10525-3p	NM_001031812	CSNK1G3	.((((((((.(((((((((((&)))))))))...)).)).)))))).	3066	3091	1	-23	1	0.00148031	0.559	0.911563	0.86915	-5.03583	19	25	9	3UTR		0	0
hsa-miR-10525-3p	NM_001032283	TMPO	(((((((.((((.((((((..&))))))..))))))))))).	3923	3943	1	-21.1	1	0.0206009	0.691	0.125307	1.50376	-7.54034	17	20	11	3UTR		0	0
hsa-miR-10525-3p	NM_001032284	TMPO	(((((((.((((.((((((..&))))))..))))))))))).	3596	3616	1	-21.1	1	0.0206009	0.691	0.125307	1.50376	-7.54034	17	20	11	3UTR		0	0
hsa-miR-10525-3p	NM_001033055	AIPL1	((((((((.((.((.((((..&)))))))))))))))).	2473	2490	1	-20.6	1	0.00628214	0.382	3.62733	4.22994	-9.07622	16	17	16	3UTR		0	0
hsa-miR-10525-3p	NM_001035511	SDHC	...(((((..(((((((((..&)))))))))....))))).	4353	4372	1	-19.4	1	0.0140876	0.529	-0.144332	0.930473	-8.81344	14	19	9	3UTR		0	0
hsa-miR-10525-3p	NM_001035512	SDHC	...(((((..(((((((((..&)))))))))....))))).	4415	4434	1	-19.4	1	0.0140876	0.529	-0.144332	0.930473	-8.81344	14	19	9	3UTR		0	0
hsa-miR-10525-3p	NM_001035513	SDHC	...(((((..(((((((((..&)))))))))....))))).	4358	4377	1	-19.4	1	0.0140876	0.529	-0.144332	0.930473	-8.81344	14	19	9	3UTR		0	0
hsa-miR-10525-3p	NM_001037164	ARL4A	...((((((((.((.(((((.&))))))))))))))).	1578	1594	1	-15.4	1	0.00192431	0.676	2.60501	1.93646	-10.5968	15	16	15	3UTR		0	0
hsa-miR-10525-3p	NM_001037984	SLC38A10	.(((((((.(((((.((((..&))))..)))))))))))).	4098	4117	1	-23.2	1	4.5094e-05	0.309	0.0120701	1.99424	-5.58516	16	19	12	3UTR		0	0
hsa-miR-10525-3p	NM_001039199	TTPAL	(((((((((.((((.((((((&)))))).........)))).))))))))).	1738	1768	1	-20.3	1	0.00337865	0.529	-0.0324097	0.250734	-5.91553	19	30	9	3UTR		0	0
hsa-miR-10525-3p	NM_001039199	TTPAL	((.(((((.((((((((((..&))))))))))..))))).)).	1965	1986	1	-19.7	1	0.0373951	0.544	-0.0687729	0.194309	-6.5515	17	21	10	3UTR		0	0
hsa-miR-10525-3p	NM_001039396	MPEG1	.((((.(((((.(((((....&)))))))))))))).	2858	2873	1	-17.2	1	0.00400226	0.647	1.2148	2.39513	-9.04109	14	15	14	3UTR		0	0
hsa-miR-10525-3p	NM_001039763	TMEM232	(((((((((.((((.......&)))).))))))))).	2508	2523	1	-16.7	1	0.00156632	0.691	1.49478	1.98813	-6.14858	13	15	9	3UTR		0	0
hsa-miR-10525-3p	NM_001039780	CCNI2	(((((((....((((((((..&))))))))..))))))).	2242	2260	1	-21.1	1	0.00160391	0.588	0.177429	-0.0877677	-11.3749	15	18	8	3UTR		0	0
hsa-miR-10525-3p	NM_001040142	SCN2A	(((((.((((((.(((((((.&))))))).)))))).))))).	7912	7933	1	-25.5	1	0.000316629	0.647	3.66769	3.60734	-7.12766	18	21	7	3UTR		0	0
hsa-miR-10525-3p	NM_001040143	SCN2A	(((((.((((((.(((((((.&))))))).)))))).))))).	8031	8052	1	-25.5	1	0.000316629	0.647	3.66769	3.60734	-7.12766	18	21	7	3UTR		0	0
hsa-miR-10525-3p	NM_001040152	PEG10	....(((..((((((((((..&))))))))))..))).	5677	5693	1	-19.8	1	0.0117154	0.544	0.257007	0.560375	-12.9166	13	16	10	3UTR		0	0
hsa-miR-10525-3p	NM_001040458	ERAP1	.((((.(((.(((((((((..&))).))))))))))))).	3834	3852	1	-18.2	1	0.00408658	0.588	4.97406	4.50192	-6.93679	16	18	13	3UTR		0	0
hsa-miR-10525-3p	NM_001040712	PTPRD	...((((.((((((((((...&)))))))))))))).	5878	5893	1	-17	1	0.000280904	0.618	4.84935	4.07859	-8.82818	14	15	14	3UTR		0	0
hsa-miR-10525-3p	NM_001042492	NF1	(.(((((.(((((((((.(((&.))).))))))))).))))).).	10921	10971	1	-22.4	1	0.0032837	0.632	0.104242	0.346273	-7.41489	18	23	9	3UTR		0	0
hsa-miR-10525-3p	NM_001042494	SLC12A6	((.(((.(((((((.(((...&))))))))))))))).	4851	4867	1	-18	1	0.00364105	0.559	3.58509	4.88724	-7.77425	15	16	15	3UTR		0	0
hsa-miR-10525-3p	NM_001042495	SLC12A6	((.(((.(((((((.(((...&))))))))))))))).	4498	4514	1	-18	1	0.00364105	0.559	4.43072	3.63863	-7.77425	15	16	15	3UTR		0	0
hsa-miR-10525-3p	NM_001042496	SLC12A6	((.(((.(((((((.(((...&))))))))))))))).	4917	4933	1	-18	1	0.00364105	0.559	5.13883	4.65272	-7.77425	15	16	15	3UTR		0	0
hsa-miR-10525-3p	NM_001042497	SLC12A6	((.(((.(((((((.(((...&))))))))))))))).	4771	4787	1	-18	1	0.00364105	0.559	5.69887	5.50242	-7.77425	15	16	15	3UTR		0	0
hsa-miR-10525-3p	NM_001042510	ZNF706	...(((((..(((((((((((&)))))))))))..))))).	1228	1247	1	-19.9	1	0.00404341	0.515	0.535955	0.974472	-8.81344	16	19	11	3UTR		0	0
hsa-miR-10525-3p	NM_001042692	WDPCP	...(((.((((.(((((((..&)))))))))))))).	2801	2816	1	-17.4	1	0.000876919	0.529	4.70001	3.18686	-11.405	14	15	14	3UTR		0	0
hsa-miR-10525-3p	NM_001044385	TMEM237	.(((((((((((.((((....&.))).).))))))))))).	3794	3815	1	-20.2	1	0.00270424	0.603	0.232078	0.307654	-5.08246	15	19	11	3UTR		0	0
hsa-miR-10525-3p	NM_001044388	ZNF557	......(((((.(((((((..&))))))).))))).	4271	4285	1	-19.4	0	0.00045634	0.5	0.146795	-0.106417	-18.9134	12	14	7	3UTR		0	0
hsa-miR-10525-3p	NM_001044723	CSNK1G3	.((((((((.(((((((((((&)))))))))...)).)).)))))).	2768	2793	1	-23	1	0.00148031	0.559	1.85408	1.0176	-5.03583	19	25	9	3UTR		0	0
hsa-miR-10525-3p	NM_001048194	RCC1	((..((((((((((((.....&))))))))))))..)).	2100	2117	1	-17	1	0.00559192	0.426	-0.740392	0.586498	-8.52714	14	17	12	3UTR		0	0
hsa-miR-10525-3p	NM_001048195	RCC1	((..((((((((((((.....&))))))))))))..)).	2058	2075	1	-17	1	0.00559192	0.426	-0.740392	0.586498	-8.52714	14	17	12	3UTR		0	0
hsa-miR-10525-3p	NM_001048199	RCC1	((..((((((((((((.....&))))))))))))..)).	2075	2092	1	-17	1	0.00559192	0.426	-0.740392	0.586498	-8.52714	14	17	12	3UTR		0	0
hsa-miR-10525-3p	NM_001077203	SENP7	....(((((((((.(((((..&)))))))))))))).	3446	3461	1	-20	1	0.0155874	0.603	0.693422	0.805012	-10.4034	14	15	14	3UTR		0	0
hsa-miR-10525-3p	NM_001077637	RAB6D	..((((((.((((((((((((&)))))))...))))))))))).	2251	2273	1	-20.6	1	0.168286	0.588	0.477742	0.486684	-6.01339	18	22	11	3UTR		0	0
hsa-miR-10525-3p	NM_001077690	ALG9	((((((.((.((((.(((...&))))))).)))))))).	2915	2932	1	-19	1	0.000528118	0.588	0.212371	-0.0434003	-7.45922	15	17	8	3UTR		0	0
hsa-miR-10525-3p	NM_001077692	ALG9	((((((.((.((((.(((...&))))))).)))))))).	3212	3229	1	-19	1	0.000528118	0.588	0.502606	0.214184	-7.45922	15	17	8	3UTR		0	0
hsa-miR-10525-3p	NM_001079526	IKZF2	.((((((((((((.(((....&.)))..)))))))))))).	6546	6570	1	-17.7	1	0.000741874	0.632	1.15433	1.01937	-4.65016	15	19	12	3UTR		0	0
hsa-miR-10525-3p	NM_001080417	ZNF629	((((((((.(.(((((((.(.&).))))))).)..)))))))).	3611	3633	1	-22.9	1	0.0206997	0.618	0.0853819	0.638642	-7.81874	17	22	8	3UTR		0	0
hsa-miR-10525-3p	NM_001080472	FITM2	.(((((((((((((((.((..&.)).))))))..))))))))).	4495	4524	1	-21.9	1	0.00290291	0.544	2.42079	1.818	-3.79332	17	22	9	3UTR		0	0
hsa-miR-10525-3p	NM_001080477	TENM3	.(((((((((.(.((((((..&)))..)))).))))))))).	10435	10455	1	-17.9	1	0.000322297	0.559	0.365635	1.56943	-7.90723	16	20	9	3UTR		0	0
hsa-miR-10525-3p	NM_001080496	RGP1	(((((((((((((((......&.))))))))...))))))).	6281	6303	1	-17.5	1	0.120195	0.721	0.0446626	0.00391293	-4.17062	15	20	8	3UTR		0	0
hsa-miR-10525-3p	NM_001080497	MEGF9	.((((((((((((((((((..&)))))))))))...))))))).	4945	4967	1	-22.7	1	0.000603674	0.5	1.94691	3.15244	-3.79332	18	22	11	3UTR		0	0
hsa-miR-10525-3p	NM_001080843	GSTT2B	((..((((((((((((((((.&))))))))).))).))))..)).	959	982	1	-21.1	1	0.0015763	0.588	-0.274838	0.204967	-8.52714	18	23	9	3UTR		0	0
hsa-miR-10525-3p	NM_001082968	TOM1L2	...((((((.(((((((((..&))))......))))))))))).	2073	2095	1	-18	1	0.00362478	0.426	-0.223992	-0.424978	-7.75705	15	22	11	3UTR		0	0
hsa-miR-10525-3p	NM_001083617	RB1CC1	.....(((((((((((((((.&)))..)))))))))))).	5423	5441	1	-18.9	1	0.00699629	0.647	2.45195	3.94712	-13.6656	15	18	12	3UTR		0	0
hsa-miR-10525-3p	NM_001085357	BTLA	.((((((.((((((((((((.&))))))))............)))).)))))).	2009	2041	1	-18.9	1	0.0500978	0.647	0.312061	0.091	-6.10696	18	32	8	3UTR		0	0
hsa-miR-10525-3p	NM_001097615	POLR2J3	((((((((..((((.((....&.)))))))))))))).	962	1004	1	-17.7	1	8.96706e-06	0.294	0.0909684	0.385687	-6.97192	14	16	14	3UTR		0	0
hsa-miR-10525-3p	NM_001098272	HMGCS1	...((((((((((((......&.)))))))))))).	4114	4141	1	-16.5	1	0.000693307	0.647	4.18866	4.70145	-6.74759	12	14	12	3UTR		0	0
hsa-miR-10525-3p	NM_001098540	HPSE	((((((((((.((((((....&.))))))))))))).))).	2292	2340	1	-20.3	1	0.00125017	0.485	0.25311	0.0710126	-6.76235	16	19	13	3UTR		0	0
hsa-miR-10525-3p	NM_001098626	ZNF98	((((..((((.(((((((...&)))))))))))..)))).	2091	2109	1	-17.9	1	0.0070943	0.75	1.12769	0.387365	-12.7823	15	18	11	3UTR		0	0
hsa-miR-10525-3p	NM_001098638	RNF169	.((((((((..(((((..((.&.))..)))))..)))))))).	3883	3914	1	-19.6	1	0.0257605	0.574	0.127358	0.284514	-7.86061	15	21	8	3UTR		0	0
hsa-miR-10525-3p	NM_001099339	COMMD7	(((..((((((.(((((....&)))))))))))))).	1007	1022	1	-17.4	1	0.00197669	0.588	4.03465	2.77236	-14.4354	14	15	14	3UTR		0	0
hsa-miR-10525-3p	NM_001099783	C4orf33	(((((((((.((((((((((.&))))))))))..))))...........................))))).	2521	2570	1	-21.5	1	0.000641697	0.603	0.568724	0.532287	-5.18008	19	49	10	3UTR		0	0
hsa-miR-10525-3p	NM_001100426	RAP1GDS1	.(((((((((((((((.....&.))))))))))))))).	2247	2283	1	-20.2	1	0.000732783	0.647	2.29281	2.2623	-3.79332	15	17	15	3UTR		0	0
hsa-miR-10525-3p	NM_001100427	RAP1GDS1	.(((((((((((((((.....&.))))))))))))))).	2244	2280	1	-20.2	1	0.000732783	0.647	2.29281	2.2623	-3.79332	15	17	15	3UTR		0	0
hsa-miR-10525-3p	NM_001100428	RAP1GDS1	.(((((((((((((((.....&.))))))))))))))).	2100	2136	1	-20.2	1	0.000732783	0.647	2.29281	2.2623	-3.79332	15	17	15	3UTR		0	0
hsa-miR-10525-3p	NM_001100429	RAP1GDS1	.(((((((((((((((.....&.))))))))))))))).	2087	2133	1	-20.2	1	0.000732783	0.647	2.40194	2.57675	-3.79332	15	17	15	3UTR		0	0
hsa-miR-10525-3p	NM_001100430	RAP1GDS1	.(((((((((((((((.....&.))))))))))))))).	1971	2007	1	-20.2	1	0.000732783	0.647	2.29281	2.2623	-3.79332	15	17	15	3UTR		0	0
hsa-miR-10525-3p	NM_001101802	PHF21A	((((((.((((.((((((...&))))))..)))))))))).	5226	5245	1	-19.2	1	0.000964094	0.5	5.8124	6.07479	-8.82806	16	19	10	3UTR		0	0
hsa-miR-10525-3p	NM_001102398	HNRNPR	.((((((((.(.(((((....&.))))).)..)))))))).	2856	2883	1	-19.1	1	0.116086	0.735	0	0	-8.38263	14	19	8	3UTR		0	0
hsa-miR-10525-3p	NM_001102399	HNRNPR	.((((((((.(.(((((....&.))))).)..)))))))).	2690	2717	1	-19.1	1	0.116086	0.735	0	0	-8.38263	14	19	8	3UTR		0	0
hsa-miR-10525-3p	NM_001102406	ALPK1	...(((((.(((.((((((..&)))))).)))))))).	5146	5162	1	-18.7	1	0.0361562	0.515	-0.201705	0.108391	-8.86006	14	16	8	3UTR		0	0
hsa-miR-10525-3p	NM_001104546	RPP30	((.(((((((((((.((((..&.))))...))))))))))).)).	3966	3996	1	-20.9	1	0.000573261	0.588	0.222175	0.272498	-6.23056	17	23	11	3UTR		0	0
hsa-miR-10525-3p	NM_001106	ACVR2B	.(((((.((((((((((((((&)))))))).))))))))))).	4959	4980	1	-21.2	1	0.000683978	0.485	-0.659523	-0.205149	-5.33701	19	21	11	3UTR		0	0
hsa-miR-10525-3p	NM_001109689	ZNF250	(((((((((((.(((((....&.))))))))))))).))).	3741	3780	1	-22.4	1	1.73694e-05	0.397	0.310355	0.00141894	-7.28438	16	19	13	3UTR		0	0
hsa-miR-10525-3p	NM_001112736	TASOR	(((((((((((...((((((.&)))))).))))))))))).	5320	5339	1	-22.5	1	0.0279885	0.721	2.90933	2.91768	-9.43035	17	19	11	3UTR		0	1
hsa-miR-10525-3p	NM_001113361	TBC1D14	...(((((.((((((((((..&.))))))))))))))).	2753	2787	1	-24.7	1	3.60649e-05	0.382	0.150115	-0.544219	-7.57093	15	17	15	3UTR		0	0
hsa-miR-10525-3p	NM_001114086	CLIC5	.(((.(((((((((.......&.)))))))))))).	3944	3969	1	-18	1	0.000559346	0.515	0.0304165	-0.207445	-8.88086	12	14	12	3UTR		0	0
hsa-miR-10525-3p	NM_001114396	KLRD1	(((.((((((((((((((((.&)))))))))...))))))).))).	2489	2513	1	-24	1	9.65872e-05	0.574	-0.150201	0.0261803	-6.9696	19	24	9	3UTR		0	0
hsa-miR-10525-3p	NM_001114396	KLRD1	.(((((...(((((.((((((&)))))))))))...))))).	12361	12381	1	-20.8	1	0.0019349	0.544	0	0	-9.44249	16	20	11	3UTR		0	0
hsa-miR-10525-3p	NM_001114634	PLAG1	((((..((..((((.(((((.&)))))))))))..)))).	4503	4521	1	-17.2	1	0.0124421	0.618	0.7107	0.74614	-12.9919	15	18	11	3UTR		0	0
hsa-miR-10525-3p	NM_001114635	PLAG1	((((..((..((((.(((((.&)))))))))))..)))).	4144	4162	1	-17.2	1	0.0124421	0.618	0.199978	0.987564	-12.9919	15	18	11	3UTR		0	0
hsa-miR-10525-3p	NM_001122964	PPP4R3B	..(((((.((((((((((...&.))))))))))))))).	4663	4695	1	-19.9	1	0.00679575	0.632	4.97202	5.07557	-7.27064	15	17	15	3UTR		0	0
hsa-miR-10525-3p	NM_001123066	MAPT	...(((((.(.((((((((..&)))))))).)))))).	6058	6074	1	-21.5	1	1.89912e-06	0.426	1.01023	0.586814	-10.3957	14	16	8	3UTR		0	0
hsa-miR-10525-3p	NM_001126049	KLLN	.(((((((((((((((.....&.))))))))))))))).	2247	2283	1	-24.7	1	0.00223315	0.603	0.701883	0.225931	-3.79332	15	17	15	3UTR		0	0
hsa-miR-10525-3p	NM_001126054	CASK	.(((((((((.(((.......&))).))))))))).	2820	2834	1	-19.3	1	1.64431e-05	0.5	0	0	-7.5866	12	14	9	3UTR		0	0
hsa-miR-10525-3p	NM_001126055	CASK	.(((((((((.(((.......&))).))))))))).	2817	2831	1	-19.3	1	1.64431e-05	0.5	0	0	-7.5866	12	14	9	3UTR		0	0
hsa-miR-10525-3p	NM_001128127	GK	(((.((((((((((.......&)))))))))).))).	2553	2568	1	-16.1	1	0.131933	0.618	0.844282	0.714424	-7.9381	13	15	10	3UTR		0	0
hsa-miR-10525-3p	NM_001128309	TSPAN14	..((((.((((((((((((..&))).))))))))).)))).	2013	2032	1	-18.9	1	0.00032212	0.574	0.509817	0.277668	-6.50069	16	19	9	3UTR		0	0
hsa-miR-10525-3p	NM_001128610	USP8	.(((((((.((((((((....&)))))))).).)))))).	5923	5941	1	-21.1	1	4.04314e-05	0.471	-0.873774	-0.150779	-4.84971	15	18	8	3UTR		0	0
hsa-miR-10525-3p	NM_001128929	ROBO2	.((((((((((((((((....&)))))...))))))))))).	7689	7709	1	-18	1	0.00420634	0.721	0.940571	1.76587	-3.79332	16	20	11	3UTR		0	0
hsa-miR-10525-3p	NM_001128933	SYNPO2	((((((((((((((.((((..&)))))))).....)))))))))).	7569	7593	1	-22.8	1	0.0340433	0.588	0.578999	0.320568	-4.67302	18	24	10	3UTR		0	0
hsa-miR-10525-3p	NM_001130046	CCL20	...((((((((((((..(((.&.)))..)))))))))))).	416	448	1	-21.1	1	0.00292888	0.529	-0.436242	0.44701	-6.74759	15	19	12	3UTR		0	0
hsa-miR-10525-3p	NM_001130067	TRIM2	((((((((((((((.(((...&))))))))))))))))).	3536	3554	1	-20.1	1	0.0249193	0.676	2.54984	2.44681	-4.67302	17	18	17	3UTR		0	0
hsa-miR-10525-3p	NM_001130446	CC2D2B	.(((((((((.(((((((...&)))))))))))))))).	982	999	1	-18.1	1	0.0221723	0.676	0.187874	0.368359	-6.6181	16	17	16	3UTR		0	0
hsa-miR-10525-3p	NM_001130524	AP1M1	.(((.((((..((((((((..&)))))))).....))))))).	10651	10672	1	-19.7	1	0.00111671	0.544	0.0818892	0.150007	-11.9796	15	21	8	3UTR		0	0
hsa-miR-10525-3p	NM_001130706	C14orf93	...(((.(((((((((((...&))))))))))).))).	2607	2623	1	-17.6	1	0.010907	0.603	0.562205	1.29917	-8.05823	14	16	11	3UTR		0	0
hsa-miR-10525-3p	NM_001130710	LSM5	...((((((((((((......&)))))))))))).	1083	1096	1	-18.6	1	0.0596986	0.662	0.047169	0.0883643	-6.74759	12	13	12	3UTR		0	0
hsa-miR-10525-3p	NM_001130912	SUGT1	((((((((((.((((((....&))))))))))))).))).	4277	4295	1	-19.7	1	0.000172541	0.456	0.135541	-0.345205	-6.76235	16	18	13	3UTR		0	0
hsa-miR-10525-3p	NM_001130993	RBP1	...((((((..(((.(((((.&))))).)))..)))))).	566	584	1	-19.9	1	1.43163e-05	0.426	0.605248	-0.0815918	-11.3173	14	18	6	3UTR		0	0
hsa-miR-10525-3p	NM_001134223	USP46	(((((.((.(.(((.(((((.&)))))))).))).))))).	1972	1991	1	-19.3	1	0.0048249	0.544	0.270142	0.0981069	-10.4551	16	19	8	3UTR		0	0
hsa-miR-10525-3p	NM_001134364	MAP4	((((((((....((.((((..&))))))..)))))))).	5197	5214	1	-17.2	1	0.00702678	0.426	1.03126	1.36466	-13.1435	14	17	8	3UTR		0	0
hsa-miR-10525-3p	NM_001134673	NFIA	((((((((((((....(((..&)))...)))))))))))).	1909	1928	1	-18	1	0.000784654	0.618	2.88194	2.61239	-7.05204	15	19	12	3UTR		0	0
hsa-miR-10525-3p	NM_001135146	SLC39A8	((((((((.(((((.......&.))))).)))))))).	2805	2845	1	-16.9	1	0.0197599	0.691	0	0	-5.96246	13	16	8	3UTR		0	0
hsa-miR-10525-3p	NM_001135179	ZDHHC3	...((((((.(((((((.(((&.))).))))))))))))).	3696	3737	1	-21.1	1	0.000122281	0.544	0	0	-7.75705	16	19	13	3UTR		0	0
hsa-miR-10525-3p	NM_001135242	NDRG1	.(((((((((((.((......&)).))))))))))).	2454	2469	1	-17.3	1	0.0015865	0.603	5.0772	4.59816	-5.3155	13	15	11	3UTR		0	0
hsa-miR-10525-3p	NM_001135575	SMIM13	..((((.(((.((((((....&)))))).))))))).	1020	1035	1	-18.6	1	0.00370645	0.647	0.717601	0.376694	-9.32546	13	15	7	3UTR		0	0
hsa-miR-10525-3p	NM_001135585	SLC2A5	......((.((((((((((..&))))))))))..)).	1200	1215	1	-18.9	0	2.85617e-07	0.397	3.66689	5.60301	-16.6229	12	15	10	3UTR		0	0
hsa-miR-10525-3p	NM_001135608	ARHGAP26	..((((.((.((((((((((.&)))))))))).)).)))).	4750	4769	1	-21	1	0.00124452	0.574	1.9767	0.610252	-7.74319	16	19	10	3UTR		0	0
hsa-miR-10525-3p	NM_001135608	ARHGAP26	(.(((((((((.((.((((..&)))).)).))))))))).).	5075	5095	1	-17.7	1	0.00507805	0.603	-0.67883	0.0421452	-9.1835	16	20	9	3UTR		0	0
hsa-miR-10525-3p	NM_001135776	ZBTB43	.......((((((((((((((&)))))))))))))).	5609	5624	1	-21.1	0	0.000292901	0.721	1.57165	2.83441	-17.1102	14	15	14	3UTR		0	0
hsa-miR-10525-3p	NM_001135776	ZBTB43	.(((((((.((((((.((((.&)))))))))).))))))).	5696	5715	1	-19.5	1	0.00520905	0.735	3.43446	3.48532	-5.08276	17	19	10	3UTR		0	0
hsa-miR-10525-3p	NM_001135863	ETFBKMT	..((((((((((((((.....&))))))..)))))))).	5582	5599	1	-18	1	0.000482253	0.662	-0.135953	0.219175	-4.957	14	17	8	3UTR		0	0
hsa-miR-10525-3p	NM_001135937	SMAD2	.(((...(..(((((((((((&)))))))))))..)...))).	14101	14122	1	-20.7	1	0.0102027	0.544	0	0	-13.6559	15	21	11	3UTR		0	0
hsa-miR-10525-3p	NM_001136049	LMLN	((((((.(((((((..((...&.))..))))))).)))))).	5633	5665	1	-20.3	1	0.00311008	0.559	0.395448	0.202192	-6.44976	15	20	7	3UTR		0	1
hsa-miR-10525-3p	NM_001136138	RPS6KC1	.((((((((((((.(((((..&.))))))))....))))))))).	4851	4888	1	-19.3	1	0.00189561	0.529	2.92569	1.81042	-4.65016	17	23	9	3UTR		0	0
hsa-miR-10525-3p	NM_001136178	EGR2	.(((((.(((((((..(((((&))))).)))))))))))).	2187	2206	1	-17.7	1	0.00264686	0.618	2.24779	2.7951	-6.30551	17	19	12	3UTR		0	0
hsa-miR-10525-3p	NM_001136197	FZR1	((((((((.(((.(((((.(.&.).))))).))))))))))).	1423	1456	1	-23.2	1	2.94297e-05	0.353	2.18124	0.757217	-6.28309	17	21	11	3UTR		0	0
hsa-miR-10525-3p	NM_001136198	FZR1	((((((((.(((.(((((.(.&.).))))).))))))))))).	1699	1732	1	-23.2	1	2.94297e-05	0.353	2.18124	0.757217	-6.28309	17	21	11	3UTR		0	0
hsa-miR-10525-3p	NM_001136478	ANP32E	.......(((((((((((((.&))))))))))))).	1749	1763	1	-17.2	0	0.0289603	0.676	0.244786	0.268837	-17.1102	13	14	13	3UTR		0	0
hsa-miR-10525-3p	NM_001137554	MCTS1	.(((((.((((((((......&.)))))))).))))).	6718	6755	1	-19.4	1	0.0149031	0.647	0.413067	0.267441	-5.57006	13	16	8	3UTR		0	0
hsa-miR-10525-3p	NM_001139499	LSM5	...((((((((((((......&)))))))))))).	1322	1335	1	-18.6	1	0.0596986	0.662	0.061882	0.249467	-6.74759	12	13	12	3UTR		0	0
hsa-miR-10525-3p	NM_001142326	DMTF1	((((((.((((((((((....&)))).)))))))))))).	2914	2932	1	-15.8	1	0.0310651	0.5	0.475755	0.295259	-5.48126	16	18	12	3UTR		0	0
hsa-miR-10525-3p	NM_001142351	ST6GAL2	((.(((((((((((.((((..&))))..)))))))).))))).	2464	2485	1	-21.2	1	0.00369047	0.5	0.513718	0.26689	-6.23056	17	21	8	3UTR		0	0
hsa-miR-10525-3p	NM_001142445	ANK1	.(((((((((((((.......&))))...))))))))).	1661	1678	1	-17.1	1	0.00728615	0.647	0.414503	0.799815	-4.76182	13	17	9	3UTR		0	1
hsa-miR-10525-3p	NM_001142523	IRAK3	.(((((((.((((((((....&)))))))).))))))).	6604	6621	1	-19.4	1	0.00266248	0.647	0.241507	0.237395	-4.84971	15	17	8	3UTR		0	0
hsa-miR-10525-3p	NM_001142579	ZNF780A	(.((((((((..((((((...&))))))....)))))))).).	3954	3975	1	-18.6	1	0.000126664	0.515	0	0	-11.2728	15	21	8	3UTR		0	0
hsa-miR-10525-3p	NM_001142645	NEMP2	..(((.(((((((((((((..&))))))))..))))).))).	3222	3242	1	-19.7	1	0.0215159	0.529	0.0806371	0.188829	-6.85796	16	20	8	3UTR		0	0
hsa-miR-10525-3p	NM_001142763	PCDH15	(((((((.((((((((((((.&))))))))....))))))))))).	6773	6797	1	-23.7	1	0.00292023	0.706	0.678705	0.651418	-6.25121	19	24	11	3UTR		0	1
hsa-miR-10525-3p	NM_001142764	PCDH15	(((((((.((((((((((((.&))))))))....))))))))))).	6758	6782	1	-23.7	1	0.00292023	0.706	0.678705	0.651418	-6.25121	19	24	11	3UTR		0	1
hsa-miR-10525-3p	NM_001142765	PCDH15	(((((((.((((((((((((.&))))))))....))))))))))).	6545	6569	1	-23.7	1	0.00292023	0.706	0.678705	0.651418	-6.25121	19	24	11	3UTR		0	1
hsa-miR-10525-3p	NM_001142766	PCDH15	(((((((.((((((((((((.&))))))))....))))))))))).	6743	6767	1	-23.7	1	0.00292023	0.706	0.678705	0.651418	-6.25121	19	24	11	3UTR		0	1
hsa-miR-10525-3p	NM_001142767	PCDH15	(((((((.((((((((((((.&))))))))....))))))))))).	6632	6656	1	-23.7	1	0.00292023	0.706	0.678705	0.651418	-6.25121	19	24	11	3UTR		0	1
hsa-miR-10525-3p	NM_001142773	PCDH15	(((((((.((((((((((((.&))))))))....))))))))))).	6683	6707	1	-23.7	1	0.00292023	0.706	0.678705	0.651418	-6.25121	19	24	11	3UTR		0	1
hsa-miR-10525-3p	NM_001144878	IMPA1	((((((((((.((((((....&))))))))))))).))).	2621	2639	1	-20.3	1	2.38488e-06	0.515	3.38442	3.6193	-6.76235	16	18	13	3UTR		0	1
hsa-miR-10525-3p	NM_001144879	IMPA1	((((((((((.((((((....&.))))))))))))).))).	2294	2329	1	-20.3	1	2.38488e-06	0.515	0.406078	0.270719	-6.76235	16	19	13	3UTR		0	1
hsa-miR-10525-3p	NM_001144923	TTC26	.((((((((.(((((.(((((&.))))))))))...)))))))).	4058	4091	1	-19.2	1	0.0170712	0.676	0.227361	0.347426	-5.26888	18	23	10	3UTR		0	0
hsa-miR-10525-3p	NM_001145204	SHISA9	.((((((((.((((.(((((.&)))))..)))).)))))))).	5030	5051	1	-19.8	1	0.0197606	0.588	-0.284315	-0.231539	-5.77128	17	21	8	3UTR		0	0
hsa-miR-10525-3p	NM_001145345	ZNF566	.(((((((((((.((((....&.)))).))))))))))).	2014	2062	1	-24	1	0.00014962	0.647	0.0888097	-0.0609902	-5.08246	15	18	11	3UTR		0	0
hsa-miR-10525-3p	NM_001145448	ZNF200	(.(((((((((.(((((((..&)))))))...))))))))).).	2502	2524	1	-20.5	1	0.00142271	0.574	0.912557	0.755284	-8.44805	17	22	9	3UTR		0	0
hsa-miR-10525-3p	NM_001145474	TEX38	...((((....((((((((((&))))))))))..)))).	733	750	1	-20	1	0.0966329	0.5	0.4188	0.522325	-13.9518	14	17	10	3UTR		0	0
hsa-miR-10525-3p	NM_001145511	NFIA	((((((((((((....(((..&)))...)))))))))))).	2053	2072	1	-18	1	0.000784654	0.618	2.88194	2.61239	-7.05204	15	19	12	3UTR		0	0
hsa-miR-10525-3p	NM_001145512	NFIA	((((((((((((....(((..&)))...)))))))))))).	2018	2037	1	-18	1	0.000784654	0.618	2.88194	2.61239	-7.05204	15	19	12	3UTR		0	0
hsa-miR-10525-3p	NM_001145514	SCRN1	((((((((((((((.((((((&))))))))))))))....)))))).	3583	3608	1	-19.4	1	0.000145594	0.574	1.26878	0.877608	-4.67302	20	25	14	3UTR		0	0
hsa-miR-10525-3p	NM_001145515	SCRN1	((((((((((((((.((((((&))))))))))))))....)))))).	3475	3500	1	-19.4	1	0.000145594	0.574	0.705633	0.494842	-4.67302	20	25	14	3UTR		0	0
hsa-miR-10525-3p	NM_001145720	ZBTB8B	((.((((.((((((((((((.&)))))))))))).)))).)).	6512	6533	1	-25.7	1	0.00291805	0.632	0.399057	0.263115	-7.80875	18	21	12	3UTR		0	0
hsa-miR-10525-3p	NM_001145798	CACNB4	...(((((.((((((((((..&))).)))))))))))).	7763	7780	1	-18	1	0.00318709	0.706	1.39805	0.566374	-7.57093	15	17	12	3UTR		0	0
hsa-miR-10525-3p	NM_001146227	RPS20	.(((..((.((((((((((..&)))))))))).))..))).	702	721	1	-20	1	0.00236451	0.559	0.01662	0.186543	-10.8697	15	19	10	3UTR		0	0
hsa-miR-10525-3p	NM_001146265	GPR85	...(..((((((((((.....&))))))))))..).	2659	2673	1	-16.6	1	0.00385085	0.647	2.3393	1.83761	-12.5345	11	14	10	3UTR		0	0
hsa-miR-10525-3p	NM_001146267	GPR85	...(..((((((((((.....&))))))))))..).	2880	2894	1	-16.6	1	0.00385085	0.647	3.26936	2.09266	-12.5345	11	14	10	3UTR		0	0
hsa-miR-10525-3p	NM_001146291	ZNF674	.(((((.(.((((((((....&)))))))).)..))))).	2447	2465	1	-18	1	0.00720607	0.529	0.610071	0.486925	-6.3934	14	18	8	3UTR		0	0
hsa-miR-10525-3p	NM_001156	ANXA7	..((((((.(((((((((...&))))))))).)))))).	2103	2120	1	-19.8	1	0.0163114	0.735	1.58083	2.51737	-6.01339	15	17	9	3UTR		0	0
hsa-miR-10525-3p	NM_001159387	B4GALNT2	((.(((((((((((((((((.&)))).))))))))))))).)).	8409	8431	1	-24.7	1	0.000823191	0.544	0.0149917	0.0481212	-5.49511	19	22	13	3UTR		0	0
hsa-miR-10525-3p	NM_001159388	B4GALNT2	((.(((((((((((((((((.&)))).))))))))))))).)).	8422	8444	1	-24.7	1	0.000823191	0.544	0	0	-5.49511	19	22	13	3UTR		0	0
hsa-miR-10525-3p	NM_001159772	CANT1	((((((((..((((.((((..&))))))))..)))))))).	2088	2107	1	-21.2	1	0.00223122	0.5	2.81596	3.46114	-6.97192	16	19	8	3UTR		0	0
hsa-miR-10525-3p	NM_001160147	DDHD1	.(((((((.((((((((....&)))))))).).)))))).	4259	4277	1	-19.1	1	0.00173576	0.5	0.631202	0.158038	-4.84971	15	18	8	3UTR		0	0
hsa-miR-10525-3p	NM_001160148	DDHD1	.(((((((.((((((((....&)))))))).).)))))).	4322	4340	1	-19.1	1	0.00173576	0.5	0.1564	0.0574494	-4.84971	15	18	8	3UTR		0	0
hsa-miR-10525-3p	NM_001160243	RPAIN	(((((((((.(((.(((....&.)))))).))))))))).	944	967	1	-18.9	1	0.00473322	0.529	3.15731	2.70144	-6.03692	15	18	9	3UTR		0	1
hsa-miR-10525-3p	NM_001160355	LY6K	....(((((((((((((((..&))))))))))...))))).	1493	1512	1	-21.8	1	0.00155218	0.515	-0.0938744	-0.167569	-9.54656	15	19	10	3UTR		0	0
hsa-miR-10525-3p	NM_001160423	IGF2BP1	..(((((.(((((((((((..&.)))))))))))..))))).	2485	2507	1	-24.8	1	0.000670452	0.5	0.725842	0.417103	-7.27064	16	20	11	3UTR		0	0
hsa-miR-10525-3p	NM_001161561	TNIK	(((((.((((((((.((((..&))))))))))))))))).	7692	7710	1	-17.1	1	0.0730175	0.676	2.7439	4.20709	-6.57398	17	18	17	3UTR		0	0
hsa-miR-10525-3p	NM_001161562	TNIK	(((((.((((((((.((((..&))))))))))))))))).	7668	7686	1	-17.1	1	0.0730175	0.676	2.7439	4.20709	-6.57398	17	18	17	3UTR		0	0
hsa-miR-10525-3p	NM_001163436	TBCK	(.((((((((((((.((((..&))))))))).....))))))).).	5461	5485	1	-17.5	1	0.00193129	0.603	1.48125	3.26398	-5.8367	17	24	9	3UTR		0	0
hsa-miR-10525-3p	NM_001163788	PTBP3	((((((((((...((((....&.)))))))))))))).	6130	6174	1	-17.9	1	0.00249847	0.618	3.6934	3.30672	-11.3983	14	16	14	3UTR		0	0
hsa-miR-10525-3p	NM_001163790	PTBP3	((((((((((...((((....&.)))))))))))))).	6209	6253	1	-17.9	1	0.00249847	0.618	4.78013	4.97066	-11.3983	14	16	14	3UTR		0	0
hsa-miR-10525-3p	NM_001164342	ZBTB20	(((((((((((((((((((..&))))...))))))......))))))))).	24407	24436	1	-21.1	1	0.00130316	0.603	5.06152	3.04627	-3.93757	19	29	9	3UTR		0	0
hsa-miR-10525-3p	NM_001164342	ZBTB20	....((((((((((((((.(.&).)))).)))))))))).	20973	20991	1	-20.3	1	0.00111587	0.676	0.109858	0.226916	-9.54656	15	18	10	3UTR		0	0
hsa-miR-10525-3p	NM_001164343	ZBTB20	...((((((((.((((((((.&)))))))))))))))).	5841	5858	1	-22.2	1	8.16524e-06	0.574	1.611	3.10091	-9.86134	16	17	16	3UTR		0	0
hsa-miR-10525-3p	NM_001164343	ZBTB20	(((((((((((((((((((..&))))...))))))......))))))))).	24869	24898	1	-21.1	1	0.00130316	0.603	6.03471	6.29432	-3.93757	19	29	9	3UTR		0	0
hsa-miR-10525-3p	NM_001164343	ZBTB20	....((((((((((((((.(.&).)))).)))))))))).	21435	21453	1	-20.3	1	0.00111587	0.676	0.448095	0.475861	-9.54656	15	18	10	3UTR		0	0
hsa-miR-10525-3p	NM_001164344	ZBTB20	...((((((((.((((((((.&)))))))))))))))).	5635	5652	1	-22.2	1	8.16524e-06	0.574	0.703722	0.235871	-9.86134	16	17	16	3UTR		0	0
hsa-miR-10525-3p	NM_001164344	ZBTB20	(((((((((((((((((((..&))))...))))))......))))))))).	24663	24692	1	-21.1	1	0.00130316	0.603	6.08758	4.58875	-3.93757	19	29	9	3UTR		0	0
hsa-miR-10525-3p	NM_001164345	ZBTB20	...((((((((.((((((((.&)))))))))))))))).	5589	5606	1	-22.2	1	8.16524e-06	0.574	-0.0505237	0.170285	-9.86134	16	17	16	3UTR		0	0
hsa-miR-10525-3p	NM_001164345	ZBTB20	(((((((((((((((((((..&))))...))))))......))))))))).	24617	24646	1	-21.1	1	0.00130316	0.603	2.36099	5.12494	-3.93757	19	29	9	3UTR		0	0
hsa-miR-10525-3p	NM_001164346	ZBTB20	(((((((((((((((((((..&))))...))))))......))))))))).	24426	24455	1	-21.1	1	0.00130316	0.603	4.65893	3.13356	-3.93757	19	29	9	3UTR		0	0
hsa-miR-10525-3p	NM_001164346	ZBTB20	....((((((((((((((.(.&).)))).)))))))))).	20992	21010	1	-20.3	1	0.00111587	0.676	0.417805	0.28087	-9.54656	15	18	10	3UTR		0	0
hsa-miR-10525-3p	NM_001164347	ZBTB20	(((((((((((((((((((..&))))...))))))......))))))))).	24448	24477	1	-21.1	1	0.00130316	0.603	2.20066	4.81569	-3.93757	19	29	9	3UTR		0	0
hsa-miR-10525-3p	NM_001164347	ZBTB20	....((((((((((((((.(.&).)))).)))))))))).	21014	21032	1	-20.3	1	0.00111587	0.676	0.417805	0.241115	-9.54656	15	18	10	3UTR		0	0
hsa-miR-10525-3p	NM_001164375	C10orf105	(((((((((.((((((.....&.))))))))))))))).	793	819	1	-22.1	1	0.00178254	0.441	-0.174863	-0.373398	-5.18008	15	17	15	3UTR		0	0
hsa-miR-10525-3p	NM_001164440	ANKRD33B	.((.(((..((((((((((..&))))))))))..))).)).	4542	4561	1	-21.4	1	0.00162311	0.426	-0.0594368	-0.432024	-10.1954	15	19	10	3UTR		0	0
hsa-miR-10525-3p	NM_001164623	AGO2	.((((.(((((((((......&.))))))))).)))).	5973	6000	1	-19.6	1	0.000203288	0.588	-0.743685	0.164561	-5.92733	13	16	9	3UTR		0	0
hsa-miR-10525-3p	NM_001164629	GTDC1	.(((((((((.(((.((((..&)))).))).))))))))).	6231	6250	1	-21.7	1	0.00032373	0.485	0.279591	0.000454663	-7.35355	16	19	9	3UTR		0	0
hsa-miR-10525-3p	NM_001164694	IYD	.(((((((.((((((((((..&)))))))))).))............))))).	5831	5862	1	-19.6	1	0.0344732	0.529	-0.028	-0.12605	-4.84971	17	31	10	3UTR		0	0
hsa-miR-10525-3p	NM_001164695	IYD	.(((((((.((((((((((..&)))))))))).))............))))).	5780	5811	1	-19.6	1	0.0344732	0.529	-0.028	-0.12605	-4.84971	17	31	10	3UTR		0	0
hsa-miR-10525-3p	NM_001164737	CALCR	((.(((.((((.((((((((.&))))))))))))))))).	2745	2763	1	-16.6	1	7.45869e-05	0.647	4.36568	2.45444	-10.3856	17	18	17	3UTR		0	0
hsa-miR-10525-3p	NM_001166105	TADA2A	.(((((((((((.((((((((&)))))))))))))....)))))).	3564	3588	1	-21.3	1	0.00293215	0.559	0.114614	0.382032	-5.08246	19	24	13	3UTR		0	0
hsa-miR-10525-3p	NM_001166135	RBM28	......((.((((((((((..&)))))))))).)).	3258	3272	1	-18.9	0	0.000360355	0.544	0.035025	-0.14653	-16.6229	12	14	10	3UTR		0	0
hsa-miR-10525-3p	NM_001166135	RBM28	.(((((((((((((((.....&))).)))))))))))).	8470	8487	1	-18.7	1	0.0183359	0.647	0.0274241	-0.0725325	-3.79332	15	17	12	3UTR		0	0
hsa-miR-10525-3p	NM_001166246	HPSE2	(((((.((..(((((((((..&)))).)))))))))))).	3610	3628	1	-17.9	1	9.9058e-06	0.397	4.32172	5.251	-8.13743	16	18	12	3UTR		0	0
hsa-miR-10525-3p	NM_001166252	PLPPR4	....(((.((((((((((((.&))))))))).))).))).	4224	4242	1	-18.8	1	0.00695598	0.647	3.29596	2.09221	-11.8602	15	18	9	3UTR		0	0
hsa-miR-10525-3p	NM_001166301	DHX40	(((((((.(((((((......&.))))))).))))))).	3275	3299	1	-18.7	1	0.0014637	0.632	1.88499	1.93022	-6.48426	14	17	7	3UTR		0	1
hsa-miR-10525-3p	NM_001166693	AFF1	.((((((..(((((((((...&))))))))).)))))).	4200	4217	1	-17.8	1	0.00485025	0.721	0.334456	1.32937	-7.16335	15	17	9	3UTR		0	0
hsa-miR-10525-3p	NM_001168360	PCDH11X	......(.(((((((((((..&))))))))))).).	5978	5992	1	-17.8	0	0.00186251	0.574	0	0	-17.8802	12	14	11	3UTR		0	0
hsa-miR-10525-3p	NM_001168361	PCDH11X	......(.(((((((((((..&))))))))))).).	5839	5853	1	-17.8	0	0.00186251	0.574	0	0	-17.8802	12	14	11	3UTR		0	0
hsa-miR-10525-3p	NM_001168362	PCDH11X	......(.(((((((((((..&))))))))))).).	5891	5905	1	-17.8	0	0.00186251	0.574	0	0	-17.8802	12	14	11	3UTR		0	0
hsa-miR-10525-3p	NM_001168363	PCDH11X	......(.(((((((((((..&))))))))))).).	5948	5962	1	-17.8	0	0.00186251	0.574	0	0	-17.8802	12	14	11	3UTR		0	0
hsa-miR-10525-3p	NM_001168378	ZIC4	..(((((((.(((((((((..&)).)))))))..))))))).	1447	1467	1	-20.4	1	0.0122492	0.559	4.16465	4.50006	-6.19951	16	20	7	3UTR		0	0
hsa-miR-10525-3p	NM_001168390	C10orf105	(((((((((.((((((.....&.))))))))))))))).	764	790	1	-22.1	1	0.00178254	0.441	-0.52298	-0.335867	-5.18008	15	17	15	3UTR		0	0
hsa-miR-10525-3p	NM_001168412	TSPAN3	(((((((((.((((((((...&.)))))).))))))))))).	2416	2453	1	-21.8	1	0.000333949	0.515	0.118081	-0.087724	-5.18008	17	20	11	3UTR		0	0
hsa-miR-10525-3p	NM_001169154	DNAAF6	(((((((....((((((((..&)))))))))))).))).	1195	1212	1	-16.9	1	0.000367955	0.5	0.17797	0.081494	-11.3749	15	17	12	3UTR		0	0
hsa-miR-10525-3p	NM_001170574	TENT5D	..(((((((((.((.......&.))))))))))).	1658	1679	1	-15.3	1	0.136288	0.735	0.536066	0.379342	-9.2723	11	13	11	3UTR		0	0
hsa-miR-10525-3p	NM_001170765	LCOR	......((((((((.((((((&)))))))))))))).	2640	2655	1	-17.5	0	0.0335124	0.574	4.07306	3.17784	-16.302	14	15	14	3UTR		0	0
hsa-miR-10525-3p	NM_001170820	IFITM10	...((((..(((((((((((.&))))))))))))))).	2094	2110	1	-21.9	1	3.0768e-05	0.397	-0.441371	-0.555269	-9.88456	15	16	15	3UTR		0	0
hsa-miR-10525-3p	NM_001171025	PTPRD	...((((.((((((((((...&)))))))))))))).	6117	6132	1	-17	1	0.000280904	0.618	5.54537	4.63972	-8.82818	14	15	14	3UTR		0	0
hsa-miR-10525-3p	NM_001171156	SIGLEC10	(((((((..(((((.((((..&))))))))))))).))).	2133	2151	1	-17.4	1	4.41069e-06	0.5	1.15421	0.431818	-8.04305	16	18	13	3UTR		0	0
hsa-miR-10525-3p	NM_001171157	SIGLEC10	(((((((..(((((.((((..&))))))))))))).))).	2022	2040	1	-17.4	1	4.41069e-06	0.5	0.1124	0.378658	-8.04305	16	18	13	3UTR		0	0
hsa-miR-10525-3p	NM_001171159	SIGLEC10	(((((((..(((((.((((..&))))))))))))).))).	1848	1866	1	-17.4	1	4.41069e-06	0.5	1.15421	0.431818	-8.04305	16	18	13	3UTR		0	0
hsa-miR-10525-3p	NM_001171197	ELAVL2	((((((((..(((((((((((&)))))).))))).........)))))))).	2907	2937	1	-18.9	1	0.0101354	0.618	5.0449	5.90413	-6.23647	19	30	8	3UTR		0	0
hsa-miR-10525-3p	NM_001171948	KXD1	.((((.((.(((((((((.(.&.).)))))))))..)).)))).	1078	1126	1	-21.5	1	0.00159207	0.338	0.245483	-0.0616414	-6.75067	16	22	9	3UTR		0	0
hsa-miR-10525-3p	NM_001171949	KXD1	.((((.((.(((((((((.(.&.).)))))))))..)).)))).	982	1030	1	-21.5	1	0.00159207	0.338	0.245483	-0.0616414	-6.75067	16	22	9	3UTR		0	0
hsa-miR-10525-3p	NM_001171967	RBFA	...(((((((((((.......&))))))))))).	5287	5299	1	-18.3	1	0.00837069	0.544	-0.15115	0.0786532	-7.48304	11	12	11	3UTR		0	0
hsa-miR-10525-3p	NM_001172411	VANGL1	.(((((((.(((((((((((.&))))..)))))))...))))))).	6915	6939	1	-19.1	1	0.0320673	0.618	-0.217636	-0.259251	-4.84971	18	24	7	3UTR		0	0
hsa-miR-10525-3p	NM_001172412	VANGL1	.(((((((.(((((((((((.&))))..)))))))...))))))).	6882	6906	1	-19.1	1	0.0320673	0.618	-0.217636	-0.259251	-4.84971	18	24	7	3UTR		0	0
hsa-miR-10525-3p	NM_001172418	BTBD9	.((((((((..(((((.....&)))))..)))))))).	6325	6341	1	-17.5	1	0.0162047	0.632	1.91453	1.51623	-7.86061	13	16	8	3UTR		0	0
hsa-miR-10525-3p	NM_001172438	PEG10	....(((..((((((((((..&))))))))))..))).	5688	5704	1	-19.8	1	0.0117154	0.544	0.257007	0.560375	-12.9166	13	16	10	3UTR		0	0
hsa-miR-10525-3p	NM_001172775	ZNF555	.((((((((((((((((....&.)))))))))).)))))).	6055	6103	1	-25.1	1	0.000105022	0.397	-0.144324	-0.0228506	-3.79332	16	19	10	3UTR		0	0
hsa-miR-10525-3p	NM_001174051	CACNA2D2	...((((..((.(((((((((&))))))))).)))))).	5167	5184	1	-18.1	1	0.00498865	0.647	2.73098	3.5578	-13.2314	15	17	9	3UTR		0	0
hsa-miR-10525-3p	NM_001174061	SMG7	((((((.((.(((((((((..&.))))))))).)))))))).	4153	4185	1	-23.8	1	0.0054513	0.515	2.73484	2.50712	-6.72377	17	20	9	3UTR		0	0
hsa-miR-10525-3p	NM_001177478	HDX	(((....((((((((((((..&))))))))))))))).	2191	2207	1	-18.2	0	0.0139935	0.574	0.723071	0.277391	-14.5333	15	16	15	3UTR		0	0
hsa-miR-10525-3p	NM_001177479	HDX	(((....((((((((((((..&))))))))))))))).	2338	2354	1	-18.2	0	0.0139935	0.574	0.992274	0.24506	-14.5333	15	16	15	3UTR		0	0
hsa-miR-10525-3p	NM_001177562	PPP2R1B	...((((.(((((((((.(((&))).))))))))).)))).	4075	4094	1	-21.5	1	4.77842e-05	0.559	4.81619	4.99422	-8.82818	16	19	9	3UTR		0	0
hsa-miR-10525-3p	NM_001177563	PPP2R1B	...((((.(((((((((.(((&))).))))))))).)))).	3829	3848	1	-21.5	1	4.77842e-05	0.559	3.99573	4.68201	-8.82818	16	19	9	3UTR		0	0
hsa-miR-10525-3p	NM_001177800	ADIPOQ	.(((((((.(((((((((((.&)))))))).)))...))))))).	3138	3161	1	-21.5	1	0.0126641	0.544	-0.21315	-0.0547377	-4.84971	18	23	8	3UTR		0	0
hsa-miR-10525-3p	NM_001177984	SCN8A	..(((((.((((((((((.((&)).)).))))))))))))).	10767	10787	1	-18.9	1	0.000217803	0.485	2.03138	2.08966	-7.27064	17	20	13	3UTR		0	0
hsa-miR-10525-3p	NM_001178096	F3	.........((((((((((..&)))))))))).	1358	1369	1	-18.3	0	0.00108001	0.5	1.02711	0.554094	-20.4803	10	11	10	3UTR		0	0
hsa-miR-10525-3p	NM_001184937	EPB41L5	((((((((((.(...((((..&))))).)))))))))).	4931	4948	1	-18.4	1	0.00419346	0.559	-0.479364	-0.157203	-9.64377	15	17	10	3UTR		0	0
hsa-miR-10525-3p	NM_001184962	PEG10	....(((..((((((((((..&))))))))))..))).	5677	5693	1	-19.8	1	0.0117154	0.544	0.257007	0.560375	-12.9166	13	16	10	3UTR		0	0
hsa-miR-10525-3p	NM_001184967	MITF	(((((((((((.((.......&)).))))))))))).	2917	2932	1	-16.9	1	9.24459e-05	0.662	1.05624	1.90843	-8.25288	13	15	11	3UTR		0	0
hsa-miR-10525-3p	NM_001184985	WNK1	((((((((((((..(((((((&.)))))))..)))))).)))))).	9993	10042	1	-20.9	1	0.0175799	0.574	0.792951	0.887009	-6.08354	19	24	7	3UTR		0	0
hsa-miR-10525-3p	NM_001190447	PPP2R3A	.(((((((((((((((((.((&.)).).)))))))))).)))))).	3612	3661	1	-24.5	1	0.000268126	0.5	-0.00886439	0.0195342	-3.79332	19	24	10	3UTR		0	0
hsa-miR-10525-3p	NM_001190479	ANKRD63	(((.(((((((((((((((((&))).)))).))))))))))))).	3641	3664	1	-19.4	1	0.000927184	0.559	1.10948	0.452329	-6.9696	20	23	13	3UTR		0	0
hsa-miR-10525-3p	NM_001190481	CLSPN	((((((((((((((..(((..&)))..))))).)))))).))).	6488	6510	1	-19.5	1	0.00290032	0.485	4.0631	2.46786	-4.90607	17	22	6	3UTR		0	0
hsa-miR-10525-3p	NM_001190737	NFIB	(((((((..(((.((((((..&))))))))).))))))).	8086	8104	1	-19.7	1	4.97566e-05	0.588	2.26214	2.87546	-8.59673	16	18	9	3UTR		0	0
hsa-miR-10525-3p	NM_001191006	SRSF10	.((((..(((((((((((...&))))))))))).)))).	2692	2709	1	-19.4	1	0.0903605	0.691	1.5565	1.11617	-7.23797	15	17	11	3UTR		0	0
hsa-miR-10525-3p	NM_001191007	SRSF10	.((((..(((((((((((...&))))))))))).)))).	2456	2473	1	-19.4	1	0.0903605	0.691	1.39921	1.41094	-7.23797	15	17	11	3UTR		0	0
hsa-miR-10525-3p	NM_001191058	PDE1C	..(((.((.((((((((((..&)))))))))).))..))).	4293	4312	1	-18	1	0.00944757	0.559	2.15935	3.44658	-7.91435	15	19	10	3UTR		0	0
hsa-miR-10525-3p	NM_001193457	IFFO1	.((((.(((.((((((.....&))))))))).)))).	2466	2481	1	-17.1	1	0.000304268	0.5	3.25038	2.58804	-6.93679	13	15	9	3UTR		0	0
hsa-miR-10525-3p	NM_001193493	SLC1A4	((((.(((.((((((((((..&))))))).)))))).)))).	1541	1561	1	-21.8	1	0.00697608	0.471	-0.595433	0.0657015	-9.113	17	20	7	3UTR		0	0
hsa-miR-10525-3p	NM_001193517	CHMP3	.((((...((((((((((.(.&.).))))))))))...)))).	1232	1282	1	-20.8	1	0.0008744	0.485	0.0549512	-0.133605	-9.55161	15	21	10	3UTR		0	0
hsa-miR-10525-3p	NM_001195220	ZNF783	.((((((((((((((((((..&.))))))))))..........)))...........))))).	3968	4011	1	-19.9	1	0.000134796	0.441	0.0900861	-0.176871	-3.79332	18	41	10	3UTR		0	0
hsa-miR-10525-3p	NM_001198609	MAP7	((((((((.((((((......&.)))))))))))))).	3970	3990	1	-17.7	1	0.113882	0.691	3.19886	2.66032	-5.22701	14	16	14	3UTR		0	0
hsa-miR-10525-3p	NM_001198611	MAP7	((((((((.((((((......&.)))))))))))))).	4204	4224	1	-17.7	1	0.113882	0.691	2.36953	1.7578	-5.22701	14	16	14	3UTR		0	0
hsa-miR-10525-3p	NM_001198614	MAP7	((((((((.((((((......&.)))))))))))))).	3949	3969	1	-17.7	1	0.113882	0.691	2.9535	2.65879	-5.22701	14	16	14	3UTR		0	0
hsa-miR-10525-3p	NM_001198617	MAP7	((((((((.((((((......&.)))))))))))))).	3363	3383	1	-17.7	1	0.113882	0.691	2.49012	2.32318	-5.22701	14	16	14	3UTR		0	0
hsa-miR-10525-3p	NM_001198625	RUNX1T1	...(((.((((((((((((..&)))))))))))).))).	5594	5611	1	-21.2	1	0.000787297	0.721	4.84419	4.79783	-8.05823	15	17	12	3UTR		0	0
hsa-miR-10525-3p	NM_001198631	RUNX1T1	...(((.((((((((((((..&)))))))))))).))).	5308	5325	1	-21.2	1	0.000787297	0.721	4.71339	4.26877	-8.05823	15	17	12	3UTR		0	0
hsa-miR-10525-3p	NM_001198632	RUNX1T1	...(((.((((((((((((..&)))))))))))).))).	5370	5387	1	-21.2	1	0.000787297	0.721	4.77057	4.78344	-8.05823	15	17	12	3UTR		0	0
hsa-miR-10525-3p	NM_001198634	RUNX1T1	...(((.((((((((((((..&)))))))))))).))).	5135	5152	1	-21.2	1	0.000787297	0.721	2.83581	3.09934	-8.05823	15	17	12	3UTR		0	0
hsa-miR-10525-3p	NM_001198665	ARHGEF12	(((((((((((.((.......&))))))))))))).	7825	7839	1	-17.2	1	2.99836e-05	0.574	0.248034	-0.0879059	-8.25288	13	14	13	3UTR		0	0
hsa-miR-10525-3p	NM_001198696	AIFM2	...((((((((((((((((..&))))))))))....................)))))).	1801	1838	1	-19.8	1	0.000243844	0.574	0.0926725	-0.0901653	-6.51454	16	37	10	3UTR		0	0
hsa-miR-10525-3p	NM_001198954	RNF103-CHMP3	.((((...((((((((((.(.&.).))))))))))...)))).	1587	1637	1	-20.8	1	0.0008744	0.485	0.0669779	-0.0592777	-9.55161	15	21	10	3UTR		0	0
hsa-miR-10525-3p	NM_001198999	SEMA6D	.(((((((((.((((((....&))))))))))))..))).	4781	4799	1	-17.5	1	0.00184337	0.632	2.50284	2.38995	-6.6181	15	18	12	3UTR		0	0
hsa-miR-10525-3p	NM_001199155	KAT7	.(((((((((((.(((((...&.))))).))))))))))).	5847	5881	1	-23.7	1	0.00155537	0.618	-0.282766	-0.31782	-5.08246	16	19	11	3UTR		0	0
hsa-miR-10525-3p	NM_001199156	KAT7	.(((((((((((.(((((...&.))))).))))))))))).	5520	5554	1	-23.7	1	0.00155537	0.618	-0.282766	-0.31782	-5.08246	16	19	11	3UTR		0	0
hsa-miR-10525-3p	NM_001199157	KAT7	.(((((((((((.(((((...&.))))).))))))))))).	5607	5641	1	-23.7	1	0.00155537	0.618	-0.282766	-0.31782	-5.08246	16	19	11	3UTR		0	0
hsa-miR-10525-3p	NM_001199158	KAT7	.(((((((((((.(((((...&.))))).))))))))))).	5430	5464	1	-23.7	1	0.00155537	0.618	-0.282766	-0.31782	-5.08246	16	19	11	3UTR		0	0
hsa-miR-10525-3p	NM_001199241	KYNU	...((.((((((((.((((..&)))))))))))).)).	11820	11836	1	-17.8	1	0.000785494	0.485	0.151232	0.0851731	-9.15095	14	16	12	3UTR		0	0
hsa-miR-10525-3p	NM_001199380	RNF145	....(((((.(((((((((..&)))))))))))))).	2867	2882	1	-18.7	1	0.000814112	0.471	4.05221	5.35803	-10.7891	14	15	14	3UTR		0	0
hsa-miR-10525-3p	NM_001199383	RNF145	....(((((.(((((((((..&)))))))))))))).	2989	3004	1	-18.7	1	0.000814112	0.471	4.91071	5.26654	-10.7891	14	15	14	3UTR		0	0
hsa-miR-10525-3p	NM_001199803	CENPO	((((((((.(((((..(((..&.)))...))))).)))))))).	2885	2927	1	-18.8	1	0.000805211	0.574	0	0	-5.96246	16	22	8	3UTR		0	0
hsa-miR-10525-3p	NM_001199830	HPSE	((((((((((.((((((....&.))))))))))))).))).	2083	2131	1	-20.3	1	0.00125017	0.485	0.0607902	0.0347889	-6.76235	16	19	13	3UTR		0	0
hsa-miR-10525-3p	NM_001199887	IL7	((((((((..(((((......&))))))))))))).	1127	1141	1	-16.2	1	0.0142792	0.588	1.49144	1.02667	-6.46952	13	14	13	3UTR		0	0
hsa-miR-10525-3p	NM_001201583	ASB11	.(((((((..(.(((((((..&))))))))))))))).	2613	2629	1	-19.3	1	8.51778e-05	0.426	0	0	-9.43902	15	16	15	3UTR		0	0
hsa-miR-10525-3p	NM_001202435	SCN1A	((.((..((((((((((....&))))))))))..)))).	7285	7302	1	-18.8	1	0.000836391	0.647	0	0	-8.93976	14	17	10	3UTR		0	1
hsa-miR-10525-3p	NM_001202470	RPS10-NUDT3	.(((((((.((((((((((..&)))))))).)).))))))).	2001	2021	1	-22.8	1	0.003328	0.529	0	0	-4.84971	17	20	8	3UTR		0	0
hsa-miR-10525-3p	NM_001202473	ZNF816-ZNF321P	((((((((.((((((((((..&)))))))))).)).......)))))).	1625	1652	1	-18.6	1	0.00138958	0.544	4.13981	3.66002	-4.99396	18	27	10	3UTR		0	0
hsa-miR-10525-3p	NM_001203251	MAPT	...(((((.(.((((((((..&)))))))).)))))).	4873	4889	1	-21.5	1	1.89912e-06	0.426	0.032357	-0.200258	-10.3957	14	16	8	3UTR		0	0
hsa-miR-10525-3p	NM_001203252	MAPT	...(((((.(.((((((((..&)))))))).)))))).	4960	4976	1	-21.5	1	1.89912e-06	0.426	0	0	-10.3957	14	16	8	3UTR		0	0
hsa-miR-10525-3p	NM_001203261	NDUFC2-KCTD14	.((((((((((((((((((..&)))).)))))))))).....)))).	869	894	1	-19.9	1	0.000745359	0.574	3.24465	0.609444	-3.79332	18	25	10	3UTR		0	0
hsa-miR-10525-3p	NM_001204082	MICOS10	...(((((((((((((((((.&))))).........)))))))))))).	1517	1544	1	-19.6	1	0.0025525	0.574	0	0	-6.51454	17	27	12	3UTR		0	0
hsa-miR-10525-3p	NM_001204144	HDAC9	.(((((((((((((((.....&.))))).)))))))))).	2957	3001	1	-20	1	0.0088667	0.647	0	0	-3.79332	15	18	10	3UTR		0	0
hsa-miR-10525-3p	NM_001204145	HDAC9	.(((((((((((((((.....&.))))).)))))))))).	2493	2537	1	-20	1	0.0088667	0.647	1.02225	1.11593	-3.79332	15	18	10	3UTR		0	0
hsa-miR-10525-3p	NM_001204146	HDAC9	.(((((((((((((((.....&.))))).)))))))))).	2710	2754	1	-20	1	0.0088667	0.647	0.981732	0.90123	-3.79332	15	18	10	3UTR		0	0
hsa-miR-10525-3p	NM_001204147	HDAC9	.(((((((((((((((.....&.))))).)))))))))).	2495	2539	1	-20	1	0.0088667	0.647	0	0	-3.79332	15	18	10	3UTR		0	0
hsa-miR-10525-3p	NM_001204148	HDAC9	.(((((((((((((((.....&.))))).)))))))))).	2642	2686	1	-20	1	0.0088667	0.647	0.697605	0.562646	-3.79332	15	18	10	3UTR		0	0
hsa-miR-10525-3p	NM_001204171	MDM4	.(((..((.((((((((((..&)))))))))).))....))).	4795	4816	1	-19	1	0.00133005	0.559	0	0	-10.8697	15	21	10	3UTR		0	0
hsa-miR-10525-3p	NM_001204172	MDM4	.(((..((.((((((((((..&)))))))))).))....))).	3967	3988	1	-19	1	0.00133005	0.559	0	0	-10.8697	15	21	10	3UTR		0	0
hsa-miR-10525-3p	NM_001204197	NBEA	(((((((((((((((.(((..&.))).))))))))))))))).	2398	2432	1	-21.4	1	0.000566427	0.618	0	0	-4.17062	18	21	15	3UTR		0	0
hsa-miR-10525-3p	NM_001204199	SRP19	...(((((((..(((((((..&)))))))....))))))).	1795	1814	1	-18.7	1	0.000912105	0.441	5.55257	5.32619	-12.6861	14	19	7	3UTR		0	0
hsa-miR-10525-3p	NM_001204204	SEC14L2	.((((.(.((((((((((((.&))))))))...)))).)..)))).	3878	3902	1	-19.5	1	0.000927838	0.515	-0.206357	-0.233034	-8.00792	17	24	8	3UTR		0	0
hsa-miR-10525-3p	NM_001204387	DLG1	.((((((((((((........&.)))))))))))).	2573	2592	1	-19	1	0.0105825	0.588	0.512484	0.71139	-5.61866	12	14	12	3UTR		0	0
hsa-miR-10525-3p	NM_001204869	CCN4	(((((((....(((((((...&.))))))).....))))))).	3159	3188	1	-20.5	1	0.0412192	0.529	0	0	-11.3749	14	21	7	3UTR		0	0
hsa-miR-10525-3p	NM_001205254	OCLN	......(((((.(((((((..&))))))).))))).	3152	3166	1	-19.4	0	0.000511923	0.574	0	0	-18.9134	12	14	7	3UTR		0	0
hsa-miR-10525-3p	NM_001205262	RAD54B	((.((((((((((((......&.)))))))))))).)).	4756	4776	1	-17.8	1	0.0461476	0.618	0	0	-5.72816	14	17	12	3UTR		0	0
hsa-miR-10525-3p	NM_001206491	MAVS	(((((((..((((((((((..&))).)))))))))))))).	2566	2585	1	-22.5	1	0.00539487	0.397	0	0	-7.3076	17	19	14	3UTR		0	0
hsa-miR-10525-3p	NM_001206736	NSFL1C	...(((((((.(.((((((..&)))))).).))))))).	2640	2657	1	-19.6	1	0.00282265	0.544	0	0	-10.6284	14	17	7	3UTR		0	0
hsa-miR-10525-3p	NM_001206971	PTPRB	.....((((((((.((((((.&))))))..)))))))).	8946	8963	1	-18.2	1	0.0278564	0.691	0	0	-14.5224	14	17	8	3UTR		0	0
hsa-miR-10525-3p	NM_001206972	PTPRB	.....((((((((.((((((.&))))))..)))))))).	8946	8963	1	-18.2	1	0.0278564	0.691	0	0	-14.5224	14	17	8	3UTR		0	0
hsa-miR-10525-3p	NM_001206994	PPP2R2C	((((((((.((.((.((((..&.)))).)).)))))))))).	4058	4080	1	-19.9	1	0.00119749	0.574	0	0	-9.07622	16	20	10	3UTR		0	1
hsa-miR-10525-3p	NM_001206996	PPP2R2C	((((((((.((.((.((((..&.)))).)).)))))))))).	4013	4035	1	-19.9	1	0.00119749	0.574	-0.214857	1.54229	-9.07622	16	20	10	3UTR		0	1
hsa-miR-10525-3p	NM_001207042	PRMT1	....((((((((((.(((...&.))))))))))))).	987	1007	1	-19.1	1	9.5269e-05	0.5	0.88113	0.182784	-10.282	13	15	13	3UTR		0	0
hsa-miR-10525-3p	NM_001218	CA12	...(((((((((((.......&))))))))))).	5583	5595	1	-17.9	1	0.00422828	0.441	0	0	-7.48304	11	12	11	3UTR		0	0
hsa-miR-10525-3p	NM_001226	CASP6	.(((((((((((.(((((...&.)))))..))))))))))).	1281	1332	1	-21.7	1	0.00273982	0.735	0	0	-5.08246	16	20	11	3UTR		0	0
hsa-miR-10525-3p	NM_001227	CASP7	...(((.(((((((.((((((&)))))).))))))).))).	983	1002	1	-18.7	1	0.000793683	0.588	2.82349	3.03514	-8.79368	16	19	7	3UTR		0	0
hsa-miR-10525-3p	NM_001240	CCNT1	.(((((.(((..((((((((.&))))))))..)))))))).	5177	5196	1	-20.4	1	0.0202868	0.662	0	0	-11.5086	16	19	8	3UTR		0	0
hsa-miR-10525-3p	NM_001242466	PIK3R1	((((((((((..((.......&))....)))))))))).	3064	3081	1	-15.6	1	0.0186747	0.485	0	0	-11.0777	12	17	10	3UTR		0	0
hsa-miR-10525-3p	NM_001242784	HLCS	(((((....((((((((((..&.))))))))))))))).	6291	6310	1	-21.9	1	7.89939e-07	0.309	0	0	-10.7522	15	17	15	3UTR		0	0
hsa-miR-10525-3p	NM_001242841	ZNF195	...(..((((((((((((((.&.))))))))))))))..).	2625	2670	1	-20.8	1	0.000975704	0.618	0	0	-12.5345	15	19	14	3UTR		0	0
hsa-miR-10525-3p	NM_001242939	FAM47E-STBD1	((((((((...(((((((((.&)))))))))...)))))))).	2240	2261	1	-22	1	0.00517712	0.5	0.10791	0.289293	-9.06125	17	21	9	3UTR		0	0
hsa-miR-10525-3p	NM_001243093	FYB1	.((((.(((((((((.((((.&))))..))))))))).)))).	3232	3253	1	-17.4	1	0.0539428	0.676	1.9743	1.82974	-5.92733	17	21	9	3UTR		0	0
hsa-miR-10525-3p	NM_001243099	IL5RA	(((((((((..(((((.....&.)))))..))))))))).	4283	4330	1	-19.7	1	0.0111803	0.515	2.93473	1.09693	-8.00486	14	18	9	3UTR		0	1
hsa-miR-10525-3p	NM_001243182	ATP7B	.(((((((..((((((((((.&)))))))))).................))))))).	4640	4675	1	-21.9	1	0.028966	0.544	2.82464	3.71591	-6.09222	17	35	10	3UTR		0	0
hsa-miR-10525-3p	NM_001243256	ZIC4	..(((((((.(((((((((..&)).)))))))..))))))).	689	709	1	-20.4	1	0.0122492	0.559	0.390945	0.420449	-6.19951	16	20	7	3UTR		0	0
hsa-miR-10525-3p	NM_001243718	RAB6A	..((((((.((((((((((((&)))))))...))))))))))).	1940	1962	1	-20.6	1	0.140851	0.588	1.80266	2.01767	-6.01339	18	22	11	3UTR		0	0
hsa-miR-10525-3p	NM_001243719	RAB6A	..((((((.((((((((((((&)))))))...))))))))))).	1791	1813	1	-20.6	1	0.140851	0.588	0	0	-6.01339	18	22	11	3UTR		0	0
hsa-miR-10525-3p	NM_001243743	FANCC	(((((((((((.(((.(((..&.))).)))))))))))))).	3282	3335	1	-23.9	1	0.000321793	0.559	0	0	-7.51743	17	20	14	3UTR		0	0
hsa-miR-10525-3p	NM_001243788	SMUG1	.((((((((((.((((((...&)))))).)))..))))))).	1590	1610	1	-21.6	1	0.0444873	0.529	0.0219866	-0.0970752	-7.14013	16	20	7	3UTR		0	0
hsa-miR-10525-3p	NM_001243789	SMUG1	.((((((((((.((((((...&)))))).)))..))))))).	1132	1152	1	-21.6	1	0.0444873	0.529	-0.0446874	0.0886613	-7.14013	16	20	7	3UTR		0	0
hsa-miR-10525-3p	NM_001243790	SMUG1	.((((((((((.((((((...&)))))).)))..))))))).	1051	1071	1	-21.6	1	0.0444873	0.529	0	0	-7.14013	16	20	7	3UTR		0	0
hsa-miR-10525-3p	NM_001243791	SMUG1	.((((((((((.((((((...&)))))).)))..))))))).	734	754	1	-21.6	1	0.0444873	0.529	0	0	-7.14013	16	20	7	3UTR		0	0
hsa-miR-10525-3p	NM_001244666	STX5	(((((((((.((.((((....&.))))))))))))))).	1139	1168	1	-19.1	1	0.000279185	0.515	0	0	-6.46921	15	17	15	3UTR		0	0
hsa-miR-10525-3p	NM_001244889	UNC5B	.(((((.((.((((.((((..&))))))))))))))).	6516	6532	1	-19.2	1	6.89544e-05	0.382	0.104345	0.0293746	-7.31497	15	16	15	3UTR		0	0
hsa-miR-10525-3p	NM_001244898	PTBP3	((((((((((...((((....&)))))))))))))).	6243	6258	1	-17.9	1	0.00249847	0.618	6.36044	4.50274	-11.3983	14	15	14	3UTR		0	0
hsa-miR-10525-3p	NM_001244960	FRMD3	((((..(((((((((.(((((&))))).)))))))))..)).)).	2687	2710	1	-19	1	0.00167141	0.588	2.79109	2.32861	-10.1906	18	23	9	3UTR		0	0
hsa-miR-10525-3p	NM_001251852	PIK3R5	(((((((..((((((((....&.))))))))....))))))).	3880	3917	1	-19.9	1	0.00482749	0.5	3.5801	2.93596	-7.3076	15	21	8	3UTR		0	0
hsa-miR-146a-3p	NM_021128	POLR2L	(((((....(((((((((....&.)))))))))...))))).	811	847	0.953846	-18.7	1	4.66062e-06	0.353	3.37499	2.68691	-10.7522	14	19	9	3UTR		0	0
hsa-miR-146a-3p	NM_002895	RBL1	(((((.(...((((.(((((..&)))))))))..).))))).	5468	5487	0.953846	-17.6	1	0.00311123	0.471	4.96232	3.67753	-11.1865	15	19	9	3UTR		0	0
hsa-miR-146a-3p	NM_005291	GPR17	(((((.....((((((((((..&))))))))))...))))).	1356	1375	0.953846	-21.3	1	0.000292895	0.471	3.66485	3.91486	-11.9948	15	19	10	3UTR		0	0
hsa-miR-146a-3p	NM_001369466	NFIB	((((((...(((((.(((((..&)))))))))))))))).	4388	4405	0.953846	-18.6	1	0.0676071	0.691	4.08521	3.81963	-9.58674	16	17	16	3UTR		0	0
hsa-miR-146a-3p	NM_152721	DOK6	.(((((...(((((((((((..&)))))))))))...))))).	7570	7590	0.955128	-21.8	1	0.0170017	0.662	-0.0418314	-0.143942	-8.70704	16	20	11	3UTR		0	0
hsa-miR-146a-3p	NM_001256441	C19orf47	(((.(((((((((((((..((.&.))..)))))))))))))...))).	2853	2885	0.961538	-21.2	1	0.00468171	0.5	3.57921	3.48479	-6.9696	18	25	13	3UTR		0	0
hsa-miR-146a-3p	NM_001256830	ASIC1	(((((.(((((((.(((.((((&)))).))).))))))).))))).	3240	3263	0.961538	-23.2	1	0.00226777	0.5	0.18792	0.507783	-6.69537	19	23	7	3UTR		0	0
hsa-miR-146a-3p	NM_001288788	TOM1L2	((((((((..((((((((....&))))))))))).))))).	5241	5259	0.961538	-17.1	1	0.00138139	0.412	3.21948	4.60323	-6.23647	16	18	11	3UTR		0	0
hsa-miR-146a-3p	NM_001291307	NOP16	(((((((....((((((((...&))))))))...))))))).	638	657	0.961538	-19.9	1	0.00152182	0.471	2.9676	2.24572	-11.3749	15	19	8	3UTR		0	0
hsa-miR-146a-3p	NM_001308295	NMT2	((((((((((((((((.((((.&.)))).))))..)))))))))).)).	4270	4305	0.961538	-18.9	1	0.00169118	0.603	5.7847	5.20055	-3.93757	20	26	10	3UTR		0	0
hsa-miR-146a-3p	NM_001311160	THY1	((.((((..(((((((((((..&))))))))))).)))).)).	5168	5188	0.961538	-23.4	1	9.26755e-05	0.471	-0.424629	0.143517	-8.86514	17	20	11	3UTR		0	0
hsa-miR-146a-3p	NM_052817	MID2	.(((((.(((((((((((((..&)))))))).....)))))..))))).	3509	3535	0.961538	-18.1	1	0.0362763	0.618	0.970332	0.237482	-5.33701	18	26	8	3UTR		0	0
hsa-miR-146a-3p	NM_058229	FBXO32	((.(((...(((((((((((..&)))))))))))))).)).	5901	5919	0.961538	-18	1	6.23873e-05	0.5	4.36999	4.78082	-10.4088	16	18	14	3UTR		0	1
hsa-miR-146a-3p	NM_080659	C11orf52	((((((...((((((((((...&.))))))))))...)))))).	945	979	0.961538	-19.5	1	0.000128614	0.471	-0.0277559	-0.185834	-8.85129	16	21	10	3UTR		0	0
hsa-miR-146a-3p	NM_177968	PPM1B	(((((.(((((((((.......&.))))))))).))))).	3084	3129	0.961538	-17.8	1	0.0134511	0.588	3.61937	3.59802	-6.07158	14	17	9	3UTR		0	0
hsa-miR-146a-3p	NM_178129	P2RY8	(((((((..((((((((((...&))))))).)))))))))).	3750	3769	0.961538	-19.5	1	0.00138606	0.544	1.89882	3.03207	-7.3076	17	19	10	3UTR		0	0
hsa-miR-146a-3p	XM_011526249	SERPINB12	..(((((((((((.(((.....&))).))))))))))).	2936	2952	0.961538	-16.5	1	8.29674e-05	0.471	0	0	-5.81384	14	16	11	3UTR		0	0
hsa-miR-146a-3p	XM_017009709	SPINK9	.......(((((((((((((..&))))))))))))).	1024	1038	0.961538	-17.3	0	0.00139366	0.632	0	0	-17.1102	13	14	13	3UTR		0	0
hsa-miR-146a-3p	XM_017022254	NTRK3	(((((..(((((((((((((..&)))))))))))))..))).)).	5596	5618	0.961538	-22.9	1	0.0163027	0.5	0	0	-7.38222	18	22	13	3UTR		0	0
hsa-miR-146a-3p	NM_014667	VGLL4	(((((((..(((((((((....&.))))))))).))))))).	1779	1821	0.961538	-20.1	1	0.00016301	0.574	2.22041	2.33186	-7.3076	16	19	9	3UTR		0	0
hsa-miR-146a-3p	NM_016060	MED31	.(((((.(((((((((((....&.))))))))))).))))).	1311	1355	0.961538	-18.8	1	0.000600361	0.412	5.41651	5.46295	-5.33701	16	19	11	3UTR		0	0
hsa-miR-146a-3p	NM_016391	NOP16	(((((((....((((((((...&))))))))...))))))).	758	777	0.961538	-19.9	1	0.00152182	0.471	2.9676	2.24572	-11.3749	15	19	8	3UTR		0	0
hsa-miR-146a-3p	NM_016654	GABPB1	(((((.......((((((((((&)))))))))).........))))).	2997	3022	0.961538	-17.5	1	0.000361804	0.676	2.81406	3.28101	-18.1663	15	25	10	3UTR		0	0
hsa-miR-146a-3p	NM_018259	TTC17	(((((.....((((((((((..&))))))))))..))))).	4104	4122	0.961538	-18.6	1	0.00131887	0.544	2.55804	1.71158	-11.9948	15	18	10	3UTR		0	0
hsa-miR-146a-3p	NM_020039	ASIC1	(((((.(((((((.(((.((((&)))).))).))))))).))))).	3613	3636	0.961538	-23.2	1	0.00226777	0.5	0.18792	0.507783	-6.69537	19	23	7	3UTR		0	0
hsa-miR-146a-3p	NM_020203	MEPE	(((((((.(((((((((((((.&))))))))))))).....................))))))).	1741	1783	0.961538	-21.1	1	1.07838e-05	0.588	-0.207309	-0.155952	-6.25121	20	42	13	3UTR		0	0
hsa-miR-146a-3p	NM_025073	SIKE1	((((((.....((.(((((((.&))))))).)))))))).	2769	2786	0.961538	-18.8	1	0.0106669	0.662	1.23846	0.36283	-13.7754	15	17	8	3UTR		0	0
hsa-miR-146a-3p	NM_002943	RORA	(((((....(((((((((((((&)))))))))).)))..))))).	3760	3782	0.961538	-17.9	1	0.0242967	0.603	-1.0093	0.0487371	-10.7522	18	22	10	3UTR		0	0
hsa-miR-146a-3p	NM_004808	NMT2	((((((((((((((((.((((.&.)))).))))..)))))))))).)).	4227	4262	0.961538	-18.9	1	0.00169118	0.603	5.05578	4.98833	-3.93757	20	26	10	3UTR		0	0
hsa-miR-146a-3p	NM_005254	GABPB1	(((((.......((((((((((&)))))))))).........))))).	3033	3058	0.961538	-17.5	1	0.000361804	0.676	3.90808	4.27384	-18.1663	15	25	10	3UTR		0	0
hsa-miR-146a-3p	NM_006540	NCOA2	..(((((((((((((.(((...&))).))))))))))))).	5541	5559	0.961538	-17.1	1	0.0707262	0.647	3.64933	4.01213	-5.19005	16	18	13	3UTR		0	1
hsa-miR-146a-3p	NM_012216	MID2	.(((((.(((((((((((((..&)))))))).....)))))..))))).	3599	3625	0.961538	-18.1	1	0.0362763	0.618	0.970332	0.237482	-5.33701	18	26	8	3UTR		0	0
hsa-miR-146a-3p	NM_001386135	AFF3	.((((((..(((((((.(((((&))))).))))))))))))).	9899	9919	0.961538	-20	1	0.0035268	0.618	0	0	-7.16335	18	20	13	3UTR		0	0
hsa-miR-146a-3p	NM_001005473	PLCXD3	((((((((((((((((((((((&)))))))))))........))))))))))).	1714	1745	0.961538	-27	1	0.000611137	0.603	-0.0285403	0.0182589	-3.93757	22	31	11	3UTR		0	1
hsa-miR-146a-3p	NM_001012338	NTRK3	(((((..(((((((((((((..&)))))))))))))..))).)).	5234	5256	0.961538	-22.9	1	0.0163027	0.5	0	0	-7.38222	18	22	13	3UTR		0	0
hsa-miR-146a-3p	NM_001039127	ZNF718	(((((((....((((((.(((.&.))).)))))).....))))))).	2603	2636	0.961538	-19.2	1	0.0136244	0.647	0.103494	-0.07621	-11.3749	16	24	7	3UTR		0	0
hsa-miR-146a-3p	NM_001079872	CUL4B	((((((.(((((((.(((....&))).))))))))))))).	5476	5494	0.961538	-17.6	1	0.0129675	0.662	3.97177	4.14481	-6.21671	16	18	13	3UTR		0	0
hsa-miR-146a-3p	NM_001080421	UNC13A	((((((((((((((((.(((((&))))).))))))))))).))))).	6607	6631	0.961538	-24.7	1	6.09132e-05	0.471	6.35847	5.30323	-3.93757	21	24	11	3UTR		0	1
hsa-miR-146a-3p	NM_001095	ASIC1	(((((.(((((((.(((.((((&)))).))).))))))).))))).	3475	3498	0.961538	-23.2	1	0.00226777	0.5	0.18792	0.507783	-6.69537	19	23	7	3UTR		0	0
hsa-miR-146a-3p	NM_001136179	EGR2	((((((((..((((((((....&.)))))))))))))))).	2133	2156	0.961538	-17.8	1	0.0246857	0.559	4.00483	2.73047	-6.23647	16	18	16	3UTR		0	0
hsa-miR-146a-3p	NM_001136555	TLK1	.(.(((..(((((((((((...&.)))))))))))..))).).	2582	2614	0.961538	-17.7	1	0.00200114	0.676	3.58812	2.79359	-9.20819	15	20	11	3UTR		0	0
hsa-miR-146a-3p	NM_001184694	MEPE	(((((((.(((((((((((((.&))))))))))))).....................))))))).	1769	1811	0.961538	-21.1	1	1.07838e-05	0.588	-0.207309	-0.155952	-6.25121	20	42	13	3UTR		0	0
hsa-miR-146a-3p	NM_001184696	MEPE	(((((((.(((((((((((((.&))))))))))))).....................))))))).	1869	1911	0.961538	-21.1	1	1.07838e-05	0.588	-0.207309	-0.155952	-6.25121	20	42	13	3UTR		0	0
hsa-miR-146a-3p	NM_001184697	MEPE	(((((((.(((((((((((((.&))))))))))))).....................))))))).	1940	1982	0.961538	-21.1	1	1.07838e-05	0.588	-0.207309	-0.155952	-6.25121	20	42	13	3UTR		0	0
hsa-miR-146a-3p	NM_001195416	DCLK1	(((((....(((((((((((..&))))))))))).....))))).	2444	2466	0.961538	-21.9	1	0.000745624	0.471	2.51314	1.04993	-10.7522	16	22	11	3UTR		0	0
hsa-miR-146a-3p	NM_001243101	NTRK3	(((((..(((((((((((((..&)))))))))))))..))).)).	5168	5190	0.961538	-22.9	1	0.0163027	0.5	0	0	-7.38222	18	22	13	3UTR		0	0
hsa-miR-146a-3p	NM_016605	FAM53C	((((.(....((((((((((((&))))))))))))).)))).	2620	2639	0.969231	-18	1	0.0071411	0.485	1.36033	1.92733	-14.2128	17	19	13	3UTR		0	0
hsa-miR-146a-3p	NM_017554	PARP14	.((((((.((((((.((((...&.)))))))))).)))))).	7558	7584	0.969231	-18	1	0.000766307	0.618	1.15198	-0.01962	-6.84241	16	19	10	3UTR		0	0
hsa-miR-146a-3p	NM_004827	ABCG2	..((((.(((((((((((((..&))))))))))))).)))).	2509	2528	0.969231	-18	1	0.00305127	0.691	2.78364	3.99033	-6.50069	17	19	13	3UTR		0	0
hsa-miR-146a-3p	NM_000633	BCL2	....((((((..((((((((((&))))))))))..)))))).	3598	3617	0.969231	-18.2	1	0.0022257	0.515	1.21633	1.38838	-15.7181	16	19	10	3UTR		0	0
hsa-miR-146a-3p	NM_001135647	FAM53C	((((.(....((((((((((((&))))))))))))).)))).	2874	2893	0.969231	-18	1	0.0071411	0.485	1.36033	1.92733	-14.2128	17	19	13	3UTR		0	0
hsa-miR-146a-3p	NM_032572	RNASE7	((((((...((((((((.((((&.)))).))))))))...)))))).	724	761	0.974359	-22.1	1	1.23758e-07	0.529	-0.145146	0.0243264	-8.85129	18	24	8	3UTR		0	0
hsa-miR-146a-3p	NM_012231	PRDM2	(((((((((.((..((((((..&))))))..))))))))))).	6932	6952	0.974359	-21.7	1	0.0116609	0.426	0.000624667	-0.105543	-7.32605	17	20	11	3UTR		0	0
hsa-miR-146a-3p	NM_001135610	PRDM2	(((((((((.((..((((((..&))))))..))))))))))).	1729	1749	0.974359	-21.7	1	0.0116609	0.426	0.000624667	-0.105543	-7.32605	17	20	11	3UTR		0	0
hsa-miR-146a-3p	NM_001378414	HDAC4	.(((((((((((.(((((....&))))).))))))))))).	5935	5953	0.974359	-20.2	1	3.63196e-05	0.471	4.26104	4.61739	-5.08246	16	18	11	3UTR		0	0
hsa-miR-146a-3p	NM_001257205	FGF1	.(((((((((((((..((((..&)))).))).)))))))))).	3124	3144	0.980769	-19.5	1	0.000590151	0.632	5.27797	2.51715	-4.76182	17	20	10	3UTR		0	0
hsa-miR-146a-3p	NM_001276336	EIF4E2	.((((((..(((((((((((..&))))))))))).)))))).	1906	1925	0.980769	-25.5	1	0.00056775	0.544	0.0987223	-0.146237	-7.16335	17	19	11	3UTR		0	1
hsa-miR-146a-3p	NM_001276337	EIF4E2	.((((((..(((((((((((..&))))))))))).)))))).	1771	1790	0.980769	-25.5	1	0.00056775	0.544	0.0987223	-0.146237	-7.16335	17	19	11	3UTR		0	1
hsa-miR-146a-3p	NM_001282958	EIF4E2	.((((((..(((((((((((..&))))))))))).)))))).	1985	2004	0.980769	-25.5	1	0.00056775	0.544	0.0987223	-0.146237	-7.16335	17	19	11	3UTR		0	1
hsa-miR-146a-3p	NM_001302643	SLC17A9	((((((.(((((((((...(((&))).))))))))))))))).	3137	3157	0.980769	-20.8	1	0.000170938	0.397	-0.817226	-0.30368	-5.48126	18	20	15	3UTR		0	0
hsa-miR-146a-3p	NM_001308162	SP140L	.(((((...(((((((((((..&)))))))))))....))))).	1940	1961	0.980769	-21.3	1	0.0187803	0.5	-0.0221969	-0.00580092	-8.70704	16	21	11	3UTR		0	0
hsa-miR-146a-3p	NM_001308163	SP140L	.(((((...(((((((((((..&)))))))))))....))))).	1835	1856	0.980769	-21.3	1	0.0187803	0.5	-0.0221969	-0.00580092	-8.70704	16	21	11	3UTR		0	0
hsa-miR-146a-3p	NM_080870	MUCL3	.(((((...(((((((((((..&.)))))))))))..))))).	4564	4614	0.980769	-22.1	1	0.00158779	0.485	-0.109828	-0.151331	-8.70704	16	20	11	3UTR		0	0
hsa-miR-146a-3p	NM_138402	SP140L	.(((((...(((((((((((..&)))))))))))....))))).	2015	2036	0.980769	-21.3	1	0.0187803	0.5	-0.0990318	-0.0397592	-8.70704	16	21	11	3UTR		0	0
hsa-miR-146a-3p	NM_203499	DDX42	.((((((..((((((((((((.&))))))))))))..)))))).	3153	3174	0.980769	-23.4	1	0.00167359	0.471	0.670582	0.964376	-7.16335	18	21	12	3UTR		0	0
hsa-miR-146a-3p	XM_005266868	FOXO3	.(((((...((((((((((((.&))))))))))))..))))).	4261	4281	0.980769	-21.4	1	0.00239104	0.515	0	0	-8.70704	17	20	12	3UTR		0	1
hsa-miR-146a-3p	XM_006713264	KIF15	..(((.((((((((((((((..&))))))))))))))..))).	3257	3277	0.980769	-20.5	1	0.063614	0.618	0	0	-6.85796	17	20	14	3UTR		0	0
hsa-miR-146a-3p	XM_006714792	ARAP3	.((((.((((((.(((((((..&))))))))))))).)))).	4963	4982	0.980769	-20.8	1	0.00637471	0.456	0	0	-6.98341	17	19	13	3UTR		0	0
hsa-miR-146a-3p	XM_011509510	PEAR1	(((((.(..(((((((((((..&)))))))))))..).))))).	4585	4606	0.980769	-23.3	1	0.000284882	0.338	0	0	-9.20856	17	21	11	3UTR		0	0
hsa-miR-146a-3p	XM_011537677	ARAP3	.((((.((((((.(((((((..&))))))))))))).)))).	4602	4621	0.980769	-20.8	1	0.00637471	0.456	0	0	-6.98341	17	19	13	3UTR		0	0
hsa-miR-146a-3p	XM_017001240	PEAR1	(((((.(..(((((((((((..&)))))))))))..).))))).	4110	4131	0.980769	-23.3	1	0.000284882	0.338	0	0	-9.20856	17	21	11	3UTR		0	0
hsa-miR-146a-3p	XM_017023528	SRL	.((((((((((((((.(((...&.))).)))))))))))))).	2594	2633	0.980769	-22.1	1	2.47465e-05	0.5	0	0	-4.02637	17	20	14	3UTR		0	1
hsa-miR-146a-3p	NM_020762	SRGAP1	.(((((...(((((((((((..&))))))))))).))))).	17929	17947	0.980769	-21.5	1	0.00291373	0.574	0.00800545	0.150755	-8.70704	16	18	11	3UTR		0	0
hsa-miR-146a-3p	NM_022061	MRPL17	.(((((...(((((((((((..&.)))))))))))..))))).	621	664	0.980769	-21.5	1	0.00117793	0.559	-0.513004	-0.0273752	-8.70704	16	20	11	3UTR		0	0
hsa-miR-146a-3p	NM_022082	SLC17A9	((((((.(((((((((...(((&))).))))))))))))))).	3075	3095	0.980769	-20.8	1	0.000170938	0.397	-0.817226	-0.30368	-5.48126	18	20	15	3UTR		0	0
hsa-miR-146a-3p	NM_003137	SRPK1	.(((((((((((((.(((((..&))))).))))))))))))).	2890	2910	0.980769	-25.3	1	0.000131947	0.603	2.89505	3.30914	-4.52877	18	20	13	3UTR		0	0
hsa-miR-146a-3p	NM_004107	FCGRT	((.(((..((((((((((((..&))))))))))))..)))..)).	1496	1518	0.980769	-22.2	1	0.00113707	0.429	-0.340772	0.0181743	-9.35244	17	22	12	3UTR		0	0
hsa-miR-146a-3p	NM_004995	MMP14	((((((...(((((((((((..&)))))))))))..)))))).	2739	2759	0.980769	-24.4	1	0.000404995	0.397	0.189398	0.140258	-8.85129	17	20	11	3UTR		0	0
hsa-miR-146a-3p	NM_007372	DDX42	.((((((..((((((((((((.&))))))))))))..)))))).	3205	3226	0.980769	-23.4	1	0.00167359	0.471	0.670582	0.964376	-7.16335	18	21	12	3UTR		0	0
hsa-miR-146a-3p	NM_001320493	VGLL3	((((....((((((((((((..&))))))))))))......)))).	1970	1993	0.980769	-22.2	1	0.0029405	0.5	3.26531	3.08252	-13.8149	16	23	12	3UTR		0	0
hsa-miR-146a-3p	NM_001346201	SRGAP1	.(((((...(((((((((((..&))))))))))).))))).	17860	17878	0.980769	-21.5	1	0.00291373	0.574	0.00800545	0.150755	-8.70704	16	18	11	3UTR		0	0
hsa-miR-146a-3p	NM_000212	ITGB3	.((((((..(((((((((((..&)))))))))))...)))))).	2974	2995	0.980769	-21.1	1	0.00137077	0.426	0.347861	0.142477	-7.16335	17	21	11	3UTR		0	0
hsa-miR-146a-3p	NM_000230	LEP	.(((((...((((((((((((.&))))))))))))..))))).	2617	2637	0.980769	-21.4	1	0.00148759	0.471	-0.54915	-0.176777	-8.70704	17	20	12	3UTR		0	0
hsa-miR-146a-3p	NM_001098814	SRL	.((((((((((((((.(((...&.))).)))))))))))))).	2563	2602	0.980769	-22.1	1	2.47465e-05	0.5	1.65958	1.37256	-4.02637	17	20	14	3UTR		0	1
hsa-miR-146a-3p	NM_001136019	FCGRT	((.(((..((((((((((((..&))))))))))))..)))..)).	1465	1487	0.980769	-22.2	1	0.00113707	0.429	-0.340772	0.0181743	-9.35244	17	22	12	3UTR		0	0
hsa-miR-146a-3p	XM_005262100	TSC22D3	((((((.(((((((.(((((((&.)))))))))))))).)).)))).	981	1021	0.991453	-21.3	1	0.00127335	0.456	0	0	-6.21671	20	24	14	3UTR		0	0
hsa-miR-146a-3p	NM_019116	UBFD1	.(((((.((.((((((((((..&)))))))))).)).))))).	3577	3597	0.991453	-22.2	1	0.000232629	0.471	0.731965	-0.439915	-6.57952	17	20	10	3UTR		0	1
hsa-miR-146a-3p	NM_001318468	TSC22D3	((((((.(((((((.(((((((&.)))))))))))))).)).)))).	1092	1132	0.991453	-21.3	1	0.00127335	0.456	0	0	-6.21671	20	24	14	3UTR		0	0
hsa-miR-146a-3p	NM_001318470	TSC22D3	((((((.(((((((.(((((((&.)))))))))))))).)).)))).	1078	1118	0.991453	-21.3	1	0.00127335	0.456	0	0	-6.21671	20	24	14	3UTR		0	0
hsa-miR-146a-3p	NM_001347723	DYRK1A	.((((((...((((((((((..&))))))))))......)))))).	12378	12401	0.991453	-20	1	0.000193705	0.471	0	0	-8.40586	16	23	10	3UTR		0	0
hsa-miR-146a-3p	NM_001252624	SLC8A1	((((((.((((((((.((((..&.))))..)))))))).)))))).	12877	12920	1	-23.2	1	0.000170131	0.5	0.140971	0.425956	-5.71431	18	23	8	3UTR	MIRT534182	0	0
hsa-miR-146a-3p	NM_001253829	PTPDC1	((((((((((((.(.((((...&.))))).)))))))))))).	3834	3860	1	-20.2	1	0.0289711	0.662	0.512742	0.297056	-5.96215	17	20	12	3UTR		0	1
hsa-miR-146a-3p	NM_001254752	UQCRB	((((((((((((((((((((..&)))))).).)))))))))).))).	4000	4024	1	-20.2	1	0.0250237	0.559	0.506376	0.791034	-3.93757	20	24	10	3UTR		0	0
hsa-miR-146a-3p	NM_001256021	TRDN	(((((....(((((((((....&.)))))))))......))))).	1676	1721	1	-19.2	1	0.0374417	0.559	0.576709	0.135789	-10.7522	14	22	9	3UTR		0	0
hsa-miR-146a-3p	NM_001256022	TRDN	.((((((..((((((((.....&.))))))))..)))))).	1080	1126	1	-19.4	1	0.000931094	0.559	2.70066	2.07677	-7.16335	14	18	8	3UTR		0	0
hsa-miR-146a-3p	NM_001256281	RAB34	.(((((((...(((((((((((&)))))))).)))))))))).	1388	1408	1	-20.9	1	0.0158307	0.382	0.689848	0.600956	-8.917	18	20	10	3UTR		0	0
hsa-miR-146a-3p	NM_001256405	KDM2A	(((((((((.(((.((((((..&.)))))).))).))))))))).	4679	4703	1	-19.9	1	0.023619	0.544	1.05215	0.637641	-6.03692	18	22	9	3UTR		0	0
hsa-miR-146a-3p	NM_001256421	GPAT3	((((((((((((((((.(((((&.))))))))))))..........))))))))).	2431	2479	1	-17.9	1	0.000275737	0.632	1.64707	0.4094	-3.93757	21	33	12	3UTR		0	0
hsa-miR-146a-3p	NM_001256422	GPAT3	((((((((((((((((.(((((&.))))))))))))..........))))))))).	2435	2483	1	-17.9	1	0.000275737	0.632	1.64707	0.4094	-3.93757	21	33	12	3UTR		0	0
hsa-miR-146a-3p	NM_001256598	PPDPFL	(((((((..((((((((.((..&.)).))))))))..))))))).	489	531	1	-23.2	1	0.00510431	0.559	-0.34097	-0.136382	-7.3076	17	22	8	3UTR		0	0
hsa-miR-146a-3p	NM_001256660	TEAD2	((((((...(((((((((((((&)))))))))))))))))..)).	1617	1639	1	-19.3	1	0.000239422	0.456	2.3356	3.29681	-8.85129	19	22	17	3UTR		0	0
hsa-miR-146a-3p	NM_001257096	PAX1	(((((....(((((((((((..&))))))))))).....))))).	5122	5144	1	-20.3	1	0.0137791	0.544	-0.177195	0.259106	-10.7522	16	22	11	3UTR		0	0
hsa-miR-146a-3p	NM_001257205	FGF1	.((((.(.((((((.(((((((&))))))))))))).).)))).	1726	1747	1	-20	1	0.00527033	0.485	1.322	1.21829	-8.74337	18	21	13	3UTR		0	0
hsa-miR-146a-3p	NM_001257207	FGF1	.((((.(.((((((.(((((((&))))))))))))).).)))).	1469	1490	1	-20	1	0.00527033	0.485	0.756547	0.400216	-8.74337	18	21	13	3UTR		0	0
hsa-miR-146a-3p	NM_001257208	FGF1	.((((.(.((((((.(((((((&))))))))))))).).)))).	1444	1465	1	-20	1	0.00527033	0.485	-0.0818797	0.432632	-8.74337	18	21	13	3UTR		0	0
hsa-miR-146a-3p	NM_001257208	FGF1	((.(((((..((((.((((((.&))))))..))))))))).)).	1651	1672	1	-18.4	1	0.00702323	0.485	0.490071	1.31895	-8.52946	17	21	9	3UTR		0	0
hsa-miR-146a-3p	NM_001257210	FGF1	.((((.(.((((((.(((((((&))))))))))))).).)))).	1404	1425	1	-20	1	0.00527033	0.485	0.425076	0.325148	-8.74337	18	21	13	3UTR		0	0
hsa-miR-146a-3p	NM_001257210	FGF1	((.(((((..((((.((((((.&))))))..))))))))).)).	1611	1632	1	-18.4	1	0.00702323	0.485	1.309	0.84039	-8.52946	17	21	9	3UTR		0	0
hsa-miR-146a-3p	NM_001258019	GRIA1	.........(((((((((((((&))))))))))))).	2844	2858	1	-16.5	0	0.00117949	0.662	2.64504	3.55205	-20.4803	13	14	13	3UTR		0	0
hsa-miR-146a-3p	NM_001258211	FBXO16	((....(((((((((((((((.&)))))))))))))))....)).	1115	1137	1	-21.2	0	2.54806e-05	0.588	3.07973	2.96334	-14.5471	17	22	15	3UTR		0	0
hsa-miR-146a-3p	NM_001258426	SLC4A9	...(((...(((((((((((..&)))))))))))...))).	2944	2962	1	-19.3	1	0.00160893	0.412	0.483185	0.483832	-11.4283	14	18	11	3UTR		0	0
hsa-miR-146a-3p	NM_001261839	TTPAL	(((((...((((((((((((..&))))))))))))))))).	3290	3308	1	-21.7	1	0.000615864	0.456	-0.263898	-0.333906	-9.69585	17	18	17	3UTR		0	0
hsa-miR-146a-3p	NM_001267045	PSME3	((((((..(((((((((((...&))))))).))))..)))))).	1730	1751	1	-19.5	1	0.00174679	0.5	0.849303	0.561865	-7.7949	17	21	7	3UTR		0	0
hsa-miR-146a-3p	NM_001267843	CLOCK	..(((((((((((((.......&))))))))))))).	6478	6492	1	-16.7	1	0.000624663	0.588	2.73609	2.7968	-5.19005	13	14	13	3UTR		0	1
hsa-miR-146a-3p	NM_001270527	STOM	((((((((((((((((......&)))))))))..))))))).	738	757	1	-17.1	1	0.0114202	0.574	4.21181	4.65783	-3.93757	16	19	9	3UTR		0	0
hsa-miR-146a-3p	NM_001270660	MARCHF6	((.((((((((((((((((...&.)))))))))))))))).)).	3502	3533	1	-19.4	1	0.00356851	0.559	1.07422	1.31045	-5.49511	18	21	16	3UTR		0	1
hsa-miR-146a-3p	NM_001270661	MARCHF6	((.((((((((((((((((...&.)))))))))))))))).)).	3331	3362	1	-19.4	1	0.00356851	0.559	1.07422	1.31045	-5.49511	18	21	16	3UTR		0	1
hsa-miR-146a-3p	NM_001270768	STRIP1	((((((((((((((........&.)))))))))))))).	2698	2746	1	-21.1	1	7.30559e-05	0.471	0.046873	0.0372802	-4.90607	14	16	14	3UTR		0	0
hsa-miR-146a-3p	NM_001270942	KLF7	(((((((((((((((.(((...&)))..))))).)))))))))).	6052	6074	1	-19.6	1	0.00127644	0.5	2.69658	3.02825	-4.17062	18	22	10	3UTR		0	0
hsa-miR-146a-3p	NM_001270943	KLF7	(((((((((((((((.(((...&)))..))))).)))))))))).	6021	6043	1	-19.6	1	0.00127644	0.5	2.8219	2.28806	-4.17062	18	22	10	3UTR		0	0
hsa-miR-146a-3p	NM_001270944	KLF7	(((((((((((((((.(((...&)))..))))).)))))))))).	5985	6007	1	-19.6	1	0.00127644	0.5	1.97811	2.06165	-4.17062	18	22	10	3UTR		0	0
hsa-miR-146a-3p	NM_001270975	IST1	((.(((((((((((..(((((.&))))).......))))))))))).)).	2397	2424	1	-18.3	1	0.0311814	0.691	0.426351	0.29194	-6.46361	18	27	11	3UTR		0	0
hsa-miR-146a-3p	NM_001270976	IST1	((.(((((((((((..(((((.&))))).......))))))))))).)).	2550	2577	1	-18.3	1	0.0311814	0.691	0.426351	0.29194	-6.46361	18	27	11	3UTR		0	0
hsa-miR-146a-3p	NM_001270977	IST1	((.(((((((((((..(((((.&))))).......))))))))))).)).	2304	2331	1	-18.3	1	0.0311814	0.691	0.426351	0.29194	-6.46361	18	27	11	3UTR		0	0
hsa-miR-146a-3p	NM_001270978	IST1	((.(((((((((((..(((((.&))))).......))))))))))).)).	2025	2052	1	-18.3	1	0.0311814	0.691	0.426351	0.29194	-6.46361	18	27	11	3UTR		0	0
hsa-miR-146a-3p	NM_001270979	IST1	((.(((((((((((..(((((.&))))).......))))))))))).)).	1979	2006	1	-18.3	1	0.0311814	0.691	0.426351	0.29194	-6.46361	18	27	11	3UTR		0	0
hsa-miR-146a-3p	NM_001271043	NFIX	.(((((((((((((((((((..&)))))))))).............))))))))).	4208	4241	1	-20.2	1	0.0187973	0.632	2.10639	1.29351	-3.79332	19	33	10	3UTR		0	0
hsa-miR-146a-3p	NM_001271044	NFIX	.(((((((((((((((((((..&)))))))))).............))))))))).	4019	4052	1	-20.2	1	0.0187973	0.632	2.10639	1.29351	-3.79332	19	33	10	3UTR		0	0
hsa-miR-146a-3p	NM_001271161	PGR	.......(((((((((((((..&))))))))))))).	9702	9716	1	-18.3	0	0.0180255	0.647	3.68991	4.57352	-17.1102	13	14	13	3UTR		0	0
hsa-miR-146a-3p	NM_001271162	PGR	.......(((((((((((((..&))))))))))))).	8764	8778	1	-18.3	0	0.0180255	0.647	0.196307	-0.039778	-17.1102	13	14	13	3UTR		0	0
hsa-miR-146a-3p	NM_001271581	DNAJC10	.((((....(((((.(((((((&))))))))))))...)))).	9758	9778	1	-17.4	1	0.00812926	0.471	-0.20888	0.0349072	-11.3434	16	20	12	3UTR		0	0
hsa-miR-146a-3p	NM_001271681	PYCR2	(((((.....((((((((((..&))))))))))))))).	1193	1209	1	-18.9	1	0.00101475	0.324	4.80116	4.22672	-11.9948	15	16	15	3UTR		0	0
hsa-miR-146a-3p	NM_001271723	FBXO38	(((((.(((((((.((......&.)).))))))).))))).	3537	3566	1	-17.9	1	0.00296927	0.676	1.72171	0.810886	-6.69537	14	18	7	3UTR		0	0
hsa-miR-146a-3p	NM_001271749	C5AR2	(((((.(..(((((.(((((..&)))))))))).).))))).	3631	3650	1	-19.9	1	0.0427264	0.426	0.283905	-0.014568	-9.94401	16	19	10	3UTR		0	0
hsa-miR-146a-3p	NM_001274	CHEK1	(((((((((((..(((((((((&)))).)))).)..))))))))))).	1945	1970	1	-19	1	0.000242966	0.603	0.383754	0.359625	-8.57351	20	25	11	3UTR		0	0
hsa-miR-146a-3p	NM_001276418	SEC16A	((((((((.....(((((((((&))))))))).....)))))))).	8305	8328	1	-23.7	1	0.00181905	0.471	0.203946	0.375676	-13.6972	17	23	9	3UTR		0	0
hsa-miR-146a-3p	NM_001277127	LRRC31	....(((((((((((((.....&))))))))))))).	1879	1893	1	-18	1	0.00962779	0.632	2.78225	1.72848	-9.54656	13	14	13	3UTR		0	0
hsa-miR-146a-3p	NM_001277128	LRRC31	....(((((((((((((.....&))))))))))))).	1693	1707	1	-18	1	0.00962779	0.632	1.6232	1.60027	-9.54656	13	14	13	3UTR		0	0
hsa-miR-146a-3p	NM_001277207	P2RY6	((((.((((((((((((.....&.)))))))))))))))).	1690	1732	1	-20	1	0.00314345	0.485	-0.217752	0.00260687	-8.05661	16	18	16	3UTR		0	0
hsa-miR-146a-3p	NM_001277313	FMN1	(((((((.((((((((((((((&)))))))))))))).))))).)).	8308	8332	1	-24.1	1	0.00415739	0.529	0.642397	0.31706	-6.25121	21	24	14	3UTR		0	0
hsa-miR-146a-3p	NM_001278172	SDHC	((((......((((((((((((&))))))))))))......)))).	2352	2375	1	-20.1	1	0.00078123	0.529	-0.296173	0.0861841	-16.1138	16	23	12	3UTR		0	0
hsa-miR-146a-3p	NM_001278195	TEX264	..((((...(((((((((((((&))))))))))))))))).	1137	1155	1	-21	1	0.0003536	0.412	2.08333	1.01223	-9.87071	17	18	17	3UTR		0	0
hsa-miR-146a-3p	NM_001278356	FRS2	(((((((((((((((((((((.&)).)))))))))...........)))))))))).	4031	4065	1	-19.4	1	0.00147024	0.618	1.08387	0.454414	-3.93757	21	34	10	3UTR		0	0
hsa-miR-146a-3p	NM_001278357	FRS2	(((((((((((((((((((((.&)).)))))))))...........)))))))))).	3892	3926	1	-19.4	1	0.00147024	0.618	1.08387	0.454414	-3.93757	21	34	10	3UTR		0	0
hsa-miR-146a-3p	NM_001278421	DYNC1I1	((((((((.((((..(((((((&)))))))..))))...)))))))).	2745	2770	1	-21.4	1	0.000412725	0.647	1.96724	2.1877	-6.58625	19	25	8	3UTR		0	0
hsa-miR-146a-3p	NM_001278549	PDK1	(((((((((.((((........&)))).))))))))).	12038	12053	1	-17.6	1	0.000202142	0.574	0.464357	-0.0748295	-6.14858	13	15	9	3UTR		0	0
hsa-miR-146a-3p	NM_001278575	THEG5	(((((....((((.((((((..&))))))))))....))))).	1024	1044	1	-17.5	1	0.121985	0.5	0.0382088	0.431441	-11.6091	15	20	10	3UTR		0	0
hsa-miR-146a-3p	NM_001278576	THEG5	(((((....((((.((((((..&))))))))))....))))).	1148	1168	1	-17.5	1	0.121985	0.5	0.0382088	0.431441	-11.6091	15	20	10	3UTR		0	0
hsa-miR-146a-3p	NM_001278577	THEG5	(((((....((((.((((((..&))))))))))....))))).	1159	1179	1	-17.5	1	0.121985	0.5	0.0382088	0.431441	-11.6091	15	20	10	3UTR		0	0
hsa-miR-146a-3p	NM_001278578	THEG5	(((((....((((.((((((..&))))))))))....))))).	1017	1037	1	-17.5	1	0.121985	0.5	0.0382088	0.431441	-11.6091	15	20	10	3UTR		0	0
hsa-miR-146a-3p	NM_001278742	TSPAN6	(((((((((((((.((((((..&)))))).)))))))).................))))).	3445	3483	1	-20.5	1	0.00028685	0.574	0	0	-4.79441	19	38	8	3UTR		0	0
hsa-miR-146a-3p	NM_001278743	TSPAN6	(((((((((((((.((((((..&)))))).)))))))).................))))).	3469	3507	1	-20.5	1	0.00028685	0.574	0	0	-4.79441	19	38	8	3UTR		0	0
hsa-miR-146a-3p	NM_001281473	MLPH	(((((....(((((.(((((..&))))))))))...))))).	3232	3251	1	-18.8	1	0.00104191	0.441	0.182201	-0.0254725	-11.4877	15	19	10	3UTR		0	0
hsa-miR-146a-3p	NM_001281712	NCAPH	.((((....(((((((((((..&))))))))))).....)))).	4525	4546	1	-19.9	1	0.0532103	0.515	0.0627638	0.154283	-10.608	15	21	11	3UTR		0	0
hsa-miR-146a-3p	NM_001282397	HPCAL4	.(((((((.(((((((.(((((&)))))))))))).))))))).	2706	2727	1	-19.9	1	0.00056773	0.559	0.54906	0.410325	-4.84971	19	21	12	3UTR		0	0
hsa-miR-146a-3p	NM_001282535	PNMA3	((((((...(((((((((((..&.)))))))))))...)))))).	2017	2046	1	-26.1	1	0.000151409	0.309	-0.112341	-0.168248	-8.85129	17	22	11	3UTR		0	0
hsa-miR-146a-3p	NM_001282540	CDRT1	(((.((((((((((.(((((..&.)))))..)))))))))).))).	2531	2580	1	-19.2	1	0.00967807	0.618	1.01653	0.576104	-7.70505	18	23	10	3UTR		0	0
hsa-miR-146a-3p	NM_001282622	KDM5C	.(((((...(((((((((((((&)))))))))))))))))).	5533	5552	1	-22	1	1.02694e-05	0.559	1.39625	1.47494	-8.70704	18	19	18	3UTR		0	0
hsa-miR-146a-3p	NM_001282629	GBGT1	.(((((....((((((((((((&))))))))))))...))))).	1294	1315	1	-22.6	1	5.90718e-05	0.397	2.89282	1.45258	-9.94954	17	21	12	3UTR		0	0
hsa-miR-146a-3p	NM_001282735	SPATS2L	(((((((..(((((((......&.)))))))..))))))).	2425	2449	1	-19.7	1	0.000387489	0.588	0.911457	1.74086	-7.3076	14	18	7	3UTR		0	0
hsa-miR-146a-3p	NM_001282743	SPATS2L	(((((((..(((((((......&.)))))))..))))))).	2364	2388	1	-19.7	1	0.000387489	0.588	0.911457	1.74086	-7.3076	14	18	7	3UTR		0	0
hsa-miR-146a-3p	NM_001282744	SPATS2L	(((((((..(((((((......&.)))))))..))))))).	2154	2178	1	-19.7	1	0.000387489	0.588	0.911457	1.74086	-7.3076	14	18	7	3UTR		0	0
hsa-miR-146a-3p	NM_001282852	CCNY	((((((..(((..(((((((((&.)))))))))..)))....)))))).	2292	2355	1	-21.8	1	2.45994e-05	0.426	1.02739	2.06202	-12.4308	18	26	9	3UTR		0	0
hsa-miR-146a-3p	NM_001282853	CCNY	((((((..(((..(((((((((&.)))))))))..)))....)))))).	2430	2493	1	-21.8	1	2.45994e-05	0.426	1.02739	2.06202	-12.4308	18	26	9	3UTR		0	0
hsa-miR-146a-3p	NM_001284207	DCAF5	(((((....(((((((((.(((&)))..)))))))))....))))).	4349	4373	1	-20.9	1	0.00432581	0.426	2.04677	2.22551	-10.7522	17	24	9	3UTR		0	0
hsa-miR-146a-3p	NM_001284214	TRIP12	(((((((....((((((((...&))))))))))))))).	7951	7967	1	-19.2	1	0.0023272	0.456	4.48629	5.96527	-11.3749	15	16	15	3UTR		0	0
hsa-miR-146a-3p	NM_001284216	TRIP12	(((((((....((((((((...&))))))))))))))).	6997	7013	1	-19.2	1	0.0023272	0.456	5.56921	6.22128	-11.3749	15	16	15	3UTR		0	0
hsa-miR-146a-3p	NM_001284256	GUCD1	.(((((((((((((........&))))))))))))).	2501	2515	1	-18.5	1	1.9825e-05	0.456	0.853815	0.099149	-4.76182	13	14	13	3UTR		0	1
hsa-miR-146a-3p	NM_001284257	GUCD1	.(((((((((((((........&))))))))))))).	2498	2512	1	-18.5	1	1.9825e-05	0.456	0.686739	0.107134	-4.76182	13	14	13	3UTR		0	1
hsa-miR-146a-3p	NM_001284313	DBNL	.(((((((.(((((((((((..&))))))))))).))))))).	7758	7778	1	-24.5	1	8.97901e-05	0.397	-0.250828	-0.10462	-4.84971	18	20	11	3UTR		0	0
hsa-miR-146a-3p	NM_001284315	DBNL	.(((((((.(((((((((((..&))))))))))).))))))).	7742	7762	1	-24.5	1	8.97901e-05	0.397	0	0	-4.84971	18	20	11	3UTR		0	0
hsa-miR-146a-3p	NM_001284391	VGLL4	(((((((..(((((((((....&.))))))))).))))))).	1814	1856	1	-20.1	1	0.00016301	0.574	2.57319	1.49601	-7.3076	16	19	9	3UTR		0	0
hsa-miR-146a-3p	NM_001284430	UTP15	.(((((((((((((((((....&.)))).))))))))))))).	3558	3583	1	-16.9	1	0.00265469	0.676	0.31624	0.369474	-3.79332	17	20	13	3UTR		0	1
hsa-miR-146a-3p	NM_001284431	UTP15	.(((((((((((((((((....&.)))).))))))))))))).	3442	3467	1	-16.9	1	0.00265469	0.676	0.31624	0.369474	-3.79332	17	20	13	3UTR		0	1
hsa-miR-146a-3p	NM_001285526	OPRM1	..((.((..((((((((((((.&))))))))))))..)).)).	12226	12246	1	-19.9	1	0.0152538	0.529	-0.157709	-0.00154	-12.4461	16	20	12	3UTR		0	0
hsa-miR-146a-3p	NM_001286264	MRS2	((((((...((((((((((((.&))))))))))))....)))))).	3019	3042	1	-23.8	1	0.00497967	0.603	-0.146447	0.0730225	-8.85129	18	23	12	3UTR		0	0
hsa-miR-146a-3p	NM_001286266	MRS2	((((((...((((((((((((.&))))))))))))....)))))).	2860	2883	1	-23.8	1	0.00497967	0.603	-0.146447	0.0730225	-8.85129	18	23	12	3UTR		0	0
hsa-miR-146a-3p	NM_001286371	VTA1	.(((((((..(((((((((((.&))))))))))).))))))).	5844	5864	1	-22.9	1	9.27576e-05	0.632	0	0	-6.09222	18	20	11	3UTR		0	0
hsa-miR-146a-3p	NM_001286372	VTA1	.(((((((..(((((((((((.&))))))))))).))))))).	5749	5769	1	-22.9	1	9.27576e-05	0.632	0	0	-6.09222	18	20	11	3UTR		0	0
hsa-miR-146a-3p	NM_001286403	CIITA	((((((...(((((((((....&))))))))))))))).	11101	11117	1	-19.5	1	3.97676e-05	0.441	0.0967385	-0.130132	-8.85129	15	16	15	3UTR		0	0
hsa-miR-146a-3p	NM_001286704	UFM1	((((((((..((((........&))))..)))))))).	2342	2357	1	-17.7	1	0.000824515	0.706	0.0849366	0.0944698	-7.20497	12	15	8	3UTR		0	0
hsa-miR-146a-3p	NM_001287338	CAB39L	((((((((((((((((((((..&.))))))))))))).))))))).	1858	1886	1	-28.5	1	1.1761e-06	0.471	0.401665	0.0241116	-3.93757	20	23	13	3UTR		0	0
hsa-miR-146a-3p	NM_001287490	AUNIP	.(((((((((((((.((((...&)))))))))))).))))).	1249	1268	1	-18.1	1	0.00434998	0.559	1.06241	0.456907	-4.52877	17	19	12	3UTR		0	0
hsa-miR-146a-3p	NM_001288725	ELP4	.....(((((((((((((((..&)))))).))))))))).	2486	2503	1	-17.8	1	0.00556947	0.75	1.38699	1.03205	-13.6656	15	17	9	3UTR		0	0
hsa-miR-146a-3p	NM_001288726	ELP4	.....(((((((((((((((..&)))))).))))))))).	2772	2789	1	-17.8	1	0.00556947	0.75	1.38699	1.03205	-13.6656	15	17	9	3UTR		0	0
hsa-miR-146a-3p	NM_001288743	TMEM273	(((((((.(((((((((.....&.))))))))).))))))).	976	1007	1	-20.1	1	0.00711052	0.647	0.155014	-0.165363	-6.25121	16	19	9	3UTR		0	0
hsa-miR-146a-3p	NM_001288780	MARCHF10	((((((.((((((((.......&)))))))))))))).	3229	3244	1	-18.7	1	0.000209568	0.515	0.326396	0.46485	-5.71431	14	15	14	3UTR		0	0
hsa-miR-146a-3p	NM_001289029	EEF2KMT	(((((....(((.((((((((.&.)))))))).)))....))))).	1377	1408	1	-20.9	1	0.221254	0.471	2.05966	0.683817	-12.0414	16	23	8	3UTR		0	0
hsa-miR-146a-3p	NM_001289053	PIGG	((((((..(((((((((((...&.)))))))))..))..)))))).	2555	2597	1	-19.3	1	0.00158949	0.426	-0.172385	-0.496775	-7.7949	17	23	9	3UTR		0	0
hsa-miR-146a-3p	NM_001289161	MICB	.((((((..(((((((((((..&))))))))...)))..)))))).	1519	1542	1	-19.5	1	0.000115168	0.515	0.0981101	0.0427662	-7.16335	17	23	8	3UTR		0	0
hsa-miR-146a-3p	NM_001290058	ALDH3B1	((((.....((((((((((((.&)))))))))))).....)))).	1907	1929	1	-21.1	1	0.0124758	0.5	-0.0508765	-0.00698176	-14.8713	16	22	12	3UTR		0	0
hsa-miR-146a-3p	NM_001290135	EI24	(((((....((((.((((((((&)))))))).))))...))))).	1729	1751	1	-19.6	1	0.0464065	0.603	1.28845	0.964322	-11.6091	17	22	8	3UTR		0	0
hsa-miR-146a-3p	NM_001290214	CTBP2	(((((((((((((((.......&.))))))))).)))))).	4794	4817	1	-18.8	1	9.33951e-05	0.574	1.65398	1.08656	-4.17062	15	18	9	3UTR		0	0
hsa-miR-146a-3p	NM_001290215	CTBP2	(((((((((((((((.......&.))))))))).)))))).	4695	4718	1	-18.8	1	9.33951e-05	0.574	0.243558	0.271765	-4.17062	15	18	9	3UTR		0	0
hsa-miR-146a-3p	NM_001291470	CCL4L2	(((((((((((((((((((...&))))))))))))))...))))).	308	331	1	-20.7	1	0.0286028	0.412	-0.0677926	0.0707707	-3.93757	19	23	14	3UTR		0	0
hsa-miR-146a-3p	NM_001291694	NR2C2	...((((((.((((((((((..&)))))))))).)))))).	5409	5427	1	-19.8	1	0.00172554	0.603	0.144196	0.322978	-7.75705	16	18	10	3UTR		0	1
hsa-miR-146a-3p	NM_001291867	NHS	((((((...(((.(((((((..&))))))).))))))))).	5569	5587	1	-20	1	0.0286831	0.529	0.0688508	0.0729225	-10.1404	16	18	9	3UTR		0	0
hsa-miR-146a-3p	NM_001291868	NHS	((((((...(((.(((((((..&))))))).))))))))).	4484	4502	1	-20	1	0.0286831	0.529	0.0688508	0.0729225	-10.1404	16	18	9	3UTR		0	0
hsa-miR-146a-3p	NM_001291951	GUCY1B1	(((((((((((((.(((((.((&)).))))).))).......)))))))))).	2531	2561	1	-17.1	1	0.00128477	0.706	0.830396	0.730562	-4.79441	20	30	10	3UTR		0	0
hsa-miR-146a-3p	NM_001291952	GUCY1B1	(((((((((((((.(((((.((&)).))))).))).......)))))))))).	2617	2647	1	-17.1	1	0.00128477	0.706	0.830396	0.730562	-4.79441	20	30	10	3UTR		0	0
hsa-miR-146a-3p	NM_001291953	GUCY1B1	(((((((((((((.(((((.((&)).))))).))).......)))))))))).	2780	2810	1	-17.1	1	0.00128477	0.706	0.830396	0.730562	-4.79441	20	30	10	3UTR		0	0
hsa-miR-146a-3p	NM_001291954	GUCY1B1	(((((((((((((.(((((.((&)).))))).))).......)))))))))).	2366	2396	1	-17.1	1	0.00128477	0.706	0.830396	0.730562	-4.79441	20	30	10	3UTR		0	0
hsa-miR-146a-3p	NM_001291955	GUCY1B1	(((((((((((((.(((((.((&)).))))).))).......)))))))))).	2391	2421	1	-17.1	1	0.00128477	0.706	0.830396	0.730562	-4.79441	20	30	10	3UTR		0	0
hsa-miR-146a-3p	NM_001291970	POLH	(((((.((.(((((.(((((..&)))))))))).)).))))).	7031	7051	1	-20.6	1	9.09818e-06	0.441	0.495964	-0.0724774	-7.63037	17	20	10	3UTR		0	0
hsa-miR-146a-3p	NM_001293298	CEMIP	((((((...((((((((((...&))))))))))..)))))).	5697	5716	1	-19.9	1	5.30982e-05	0.426	-0.487384	-0.566293	-8.85129	16	19	10	3UTR		0	1
hsa-miR-146a-3p	NM_001293304	CEMIP	((((((...((((((((((...&))))))))))..)))))).	5637	5656	1	-19.9	1	5.30982e-05	0.426	-0.487384	-0.566293	-8.85129	16	19	10	3UTR		0	1
hsa-miR-146a-3p	NM_001297576	PEA15	((((((....((((((((((((&))))))))))))..)))))).	1212	1233	1	-21.3	1	0.0045097	0.485	-0.230814	0.367911	-10.0938	18	21	12	3UTR		0	0
hsa-miR-146a-3p	NM_001297578	PEA15	((((((....((((((((((((&))))))))))))..)))))).	839	860	1	-21.3	1	0.0045097	0.485	-0.230814	0.367911	-10.0938	18	21	12	3UTR		0	0
hsa-miR-146a-3p	NM_001297617	ELOVL7	((..((((.((((((((((((.&)))))))))))).))))...)).	2633	2656	1	-19.7	1	0.00123378	0.676	0.0561335	0.494488	-9.58353	18	23	12	3UTR		0	0
hsa-miR-146a-3p	NM_001297642	C1RL	(((((((..((((((((((((.&))))))).)))))..))))))).	2154	2177	1	-24.8	1	0.00254274	0.5	0.228615	0.671	-7.3076	19	23	7	3UTR		0	0
hsa-miR-146a-3p	NM_001300789	PEX5	((((((((((((((((((((((&.))))..))))))))))))))).))).	2726	2761	1	-25.1	1	0.000445595	0.544	0.157511	0.0350583	-3.93757	22	27	15	3UTR		0	0
hsa-miR-146a-3p	NM_001300810	KRT85	(((((((((..(((((..((((&.)))).))))).))))))))).	1267	1311	1	-19.9	1	0.000494049	0.5	2.87695	2.2615	-8.00486	18	22	9	3UTR		0	0
hsa-miR-146a-3p	NM_001300912	ZNF333	(((((....((((((((((((.&.))))))))))))...))))).	1380	1424	1	-24.8	1	0.000729778	0.412	-0.0661775	-0.0373249	-10.7522	17	22	12	3UTR		0	0
hsa-miR-146a-3p	NM_001300981	PPIA	(((((.(...((((.(((((((&)))))))))))..).))))).	1233	1254	1	-19.5	1	0.00172191	0.485	-0.0733195	0.201626	-11.1865	17	21	11	3UTR		0	0
hsa-miR-146a-3p	NM_001301016	HNRNPUL1	(((((((..(((..((((((..&))))))..)))..))))))).	3397	3418	1	-18.8	1	0.0269727	0.456	0.606964	0.755882	-9.45357	16	21	7	3UTR		0	0
hsa-miR-146a-3p	NM_001301028	ABLIM3	(((((...(((((((.(.((((&.))))).)))))))...))))).	2329	2358	1	-20.7	1	0.0738007	0.382	1.20657	0.678612	-9.9289	17	23	7	3UTR		0	0
hsa-miR-146a-3p	NM_001301035	ERF	(((((.(..((((((((((...&))))))))))..).))))).	2546	2566	1	-19.4	1	0.000353004	0.471	0.0935299	1.76105	-9.20856	16	20	10	3UTR		0	0
hsa-miR-146a-3p	NM_001301044	CADM1	.(((((((..(((((((((((.&)))))))))))............))))))).	6661	6692	1	-19.7	1	0.00496179	0.588	2.92878	2.79449	-6.09222	18	31	11	3UTR		0	0
hsa-miR-146a-3p	NM_001301046	DACT3	((((((((..(((((.((((..&)))).))))))))))))).	2263	2282	1	-17.8	1	0.00220868	0.456	0.884035	1.41846	-6.46952	17	19	13	3UTR		0	0
hsa-miR-146a-3p	NM_001301088	ROBO4	(((((....(((((((((((..&))))).)))))).....))))).	3451	3474	1	-20	1	0.00100564	0.456	0.0948922	0.824965	-10.7522	16	23	6	3UTR		0	0
hsa-miR-146a-3p	NM_001302746	FASLG	..(((((((..(((((((((..&)))))))))..))))))).	1259	1278	1	-21.1	1	0.000174299	0.485	0.0847437	0.141378	-9.02428	16	19	9	3UTR		0	0
hsa-miR-146a-3p	NM_001303110	COL4A1	..((((..((((((((((((((&)))))))))))))))))).	2171	2190	1	-20.5	1	0.00026232	0.588	4.0258	3.34211	-8.81432	18	19	18	3UTR		0	0
hsa-miR-146a-3p	NM_001303256	MORC2	((((((...(((((.(((((..&.))))))))))...)))))).	5257	5289	1	-20.5	1	0.0019571	0.426	-1.32466	0.167921	-9.58674	16	21	10	3UTR		0	0
hsa-miR-146a-3p	NM_001303494	CBX6	((((((.((((((((((((...&.))))))))))))...)))))).	4693	4735	1	-22.1	1	1.17755e-07	0.338	1.3264	0.729976	-5.48126	18	23	12	3UTR		0	0
hsa-miR-146a-3p	NM_001304533	NKAIN3	((((((....(((((((.....&))))))))))))).	5318	5332	1	-18.2	1	0.00688184	0.632	-0.0160146	0.0345038	-10.0938	13	14	13	3UTR		0	0
hsa-miR-146a-3p	NM_001305000	MED11	(((((((....(((((((((..&)))))))))))))).)).	433	451	1	-19.1	1	0.00254988	0.412	5.1632	4.38851	-11.3749	16	18	14	3UTR		0	0
hsa-miR-146a-3p	NM_001305545	RNF43	((((.(((((((((.(((((((&.)))))))))))))))).)))).	2455	2486	1	-23.5	1	1.209e-06	0.471	1.57117	1.67411	-8.79206	20	23	16	3UTR		0	0
hsa-miR-146a-3p	NM_001306150	C5orf38	.(((((...(((((((((..((&.))..)))))))))...))))).	1089	1129	1	-19.2	1	0.0510606	0.603	0.906387	0.498228	-8.70704	16	23	9	3UTR		0	0
hsa-miR-146a-3p	NM_001307931	ZYG11A	((((((((((((..........&)))))))))))).	1659	1672	1	-18.8	1	6.90639e-06	0.544	-0.245758	0.115214	-7.05204	12	13	12	3UTR		0	0
hsa-miR-146a-3p	NM_001308023	TNS1	((((((.((((((.(((((...&.))))).)))))).)))))).	5671	5699	1	-22.2	1	0.187368	0.471	3.36918	3.1277	-6.3381	17	21	6	3UTR		0	0
hsa-miR-146a-3p	NM_001308023	TNS1	(((((((((((.((((((((..&)))))))).......))))))))))).	5627	5654	1	-21.5	1	0.000852765	0.471	3.32136	3.18867	-7.28438	19	27	11	3UTR		0	0
hsa-miR-146a-3p	NM_001308044	RBM23	((((((.(((((((.(((((..&))))).))))))))))))).	3079	3099	1	-22.9	1	1.74974e-05	0.471	0.545476	-0.00452873	-6.21671	18	20	13	3UTR		0	0
hsa-miR-146a-3p	NM_001308081	DTWD2	.((((((((((((((((((...&.)))).)))))))))))))).	4124	4176	1	-22.5	1	2.24525e-05	0.574	0.225665	0.116076	-3.79332	18	21	14	3UTR		0	0
hsa-miR-146a-3p	NM_001308122	SLC22A5	(((((.....((((((((((..&)))))).))))))))).	2025	2042	1	-16.8	1	0.0155955	0.544	0.507362	1.08377	-11.9948	15	17	9	3UTR		0	0
hsa-miR-146a-3p	NM_001308154	RAB15	(((((((..(((((((((((((&))))))))))))).))))))).	1683	1705	1	-26	1	8.90888e-07	0.441	0.84414	0.69398	-7.3076	20	22	13	3UTR		0	0
hsa-miR-146a-3p	NM_001308173	CCNJL	(((((((((((.((((((((((&))))).).)))).))))))))))).	5594	5619	1	-19.4	1	0.00138096	0.574	0.202051	0.0540902	-7.28438	21	25	11	3UTR		0	0
hsa-miR-146a-3p	NM_001308203	SGIP1	.(((......(((((((((((.&))))))))))).....))).	2125	2145	1	-18.6	1	0.00663612	0.721	2.66819	2.58509	-15.9695	14	20	11	3UTR		0	0
hsa-miR-146a-3p	NM_001308269	ZNF121	.((((((..(((((.(((((((&))))))).)))))....)))))).	2890	2914	1	-19.5	1	0.00224523	0.574	0.290732	0.111395	-7.8988	18	24	7	3UTR		0	0
hsa-miR-146a-3p	NM_001308471	CYSLTR2	.((((((..(((((((((((((&)))))))).)))))..)))))).	2325	2348	1	-21.4	1	0.00125479	0.676	0.350832	0.198723	-7.16335	19	23	8	3UTR		0	0
hsa-miR-146a-3p	NM_001311201	CLNS1A	.(((((.(((((((((((((((&)))))))).))))))).))))).	1859	1882	1	-21.6	1	0.00356522	0.662	0.190027	0.0625466	-5.33701	20	23	8	3UTR		0	0
hsa-miR-146a-3p	NM_001312909	FAM111A	(((((((((.(((((((((...&))))))))))))).))))).	3630	3650	1	-18.9	1	0.000123295	0.529	-0.0291501	0.0682319	-5.18008	18	20	13	3UTR		0	0
hsa-miR-146a-3p	NM_001316306	ITGA6	.((((((((.((((.(((((((&.))))))))))))))))))).	3422	3453	1	-24.1	1	0.000551193	0.574	0.335435	0.831242	-5.77128	19	21	19	3UTR		0	1
hsa-miR-146a-3p	NM_001317122	AGO1	(((((((..(((((((((((((&)))))..))))))))))))))).	12518	12541	1	-21.9	1	0.000192603	0.632	0	0	-7.3076	20	23	15	3UTR		0	0
hsa-miR-146a-3p	NM_001317123	AGO1	(((((((..(((((((((((((&)))))..))))))))))))))).	12423	12446	1	-21.9	1	0.000192603	0.632	0	0	-7.3076	20	23	15	3UTR		0	0
hsa-miR-146a-3p	NM_001317123	AGO1	(((((...((((.(((((((((&))))))))).))))))))).	4904	4924	1	-21.5	1	0.0234156	0.412	3.19603	2.3478	-10.985	18	20	9	3UTR		0	0
hsa-miR-146a-3p	NM_001317818	SLC10A7	((((((((((((((........&.))).))))))))))).	1142	1166	1	-18.3	1	0.000629566	0.544	0.496855	0.673951	-4.90607	14	17	11	3UTR		0	0
hsa-miR-146a-3p	NM_001317896	SMIM14	(((((.(((((...((((((((&))))))))))))).))))).	935	955	1	-17.1	1	0.00278242	0.706	2.14492	1.55129	-11.3313	18	20	13	3UTR		0	0
hsa-miR-146a-3p	NM_001317944	BSPRY	(((((....((((((((((...&)))))))))).......))))).	2137	2160	1	-18.6	1	0.00269952	0.515	0.0222237	0.259785	-10.7522	15	23	10	3UTR		0	0
hsa-miR-146a-3p	NM_001318040	ZNF618	(((((....(((((((((((..&)))))))))))..))))).	7289	7308	1	-22.1	1	0.00309233	0.426	-0.732094	0.182391	-10.7522	16	19	11	3UTR		0	1
hsa-miR-146a-3p	NM_001318042	ZNF618	(((((....(((((((((((..&)))))))))))..))))).	7388	7407	1	-22.1	1	0.00309233	0.426	0.312795	0.817513	-10.7522	16	19	11	3UTR		0	1
hsa-miR-146a-3p	NM_001318188	HNRNPK	.((((....((((((((((((.&)))))))))))))))).	1568	1585	1	-19.7	1	3.16452e-05	0.662	2.57673	3.57068	-10.608	16	17	16	3UTR		0	1
hsa-miR-146a-3p	NM_030634	ZNF436	.(((((((((((((((((....&)))).)))))))).))))).	2792	2812	1	-18.5	1	0.00261772	0.632	1.68723	2.46301	-3.79332	17	20	8	3UTR		0	0
hsa-miR-146a-3p	NM_030760	S1PR5	.((((...((((((((((((((&))))))))))))))...)))).	2006	2028	1	-23.2	1	0.0614579	0.588	3.2357	2.64229	-9.55161	18	22	14	3UTR		0	0
hsa-miR-146a-3p	NM_030793	FBXO38	(((((.(((((((.((......&.)).))))))).))))).	4047	4076	1	-17.9	1	0.00296927	0.676	1.07177	1.52071	-6.69537	14	18	7	3UTR		0	0
hsa-miR-146a-3p	NM_030807	SLC2A11	((((((..((((((((......&))))))))..)))))).	2115	2132	1	-18.8	1	1.67102e-06	0.588	-0.265894	-0.0228799	-7.7949	14	17	8	3UTR		0	0
hsa-miR-146a-3p	NM_030809	CSRNP2	((((...((((((((((((...&))))))))))))....)))).	2703	2724	1	-19.2	1	4.19706e-05	0.515	1.10497	1.14979	-11.5013	16	21	12	3UTR		0	0
hsa-miR-146a-3p	NM_031208	FAHD1	.((((....(((((.(((((((&))))))))))))...)))).	949	969	1	-18.4	1	0.000592771	0.412	0.325576	-0.148198	-11.3434	16	20	12	3UTR		0	0
hsa-miR-146a-3p	NM_031263	HNRNPK	.((((....((((((((((((.&)))))))))))))))).	1628	1645	1	-19.7	1	2.66966e-05	0.662	2.57673	3.57068	-10.608	16	17	16	3UTR		0	1
hsa-miR-146a-3p	NM_031421	TTC25	((((((((((((..((((((..&)))))).))))))))).))).	2372	2393	1	-20.4	1	0.00307213	0.515	0.00883443	0.00186647	-6.08354	18	21	9	3UTR		0	0
hsa-miR-146a-3p	NM_031467	SLC4A9	...(((...(((((((((((..&)))))))))))...))).	2986	3004	1	-19.3	1	0.00160893	0.412	0.483185	0.483832	-11.4283	14	18	11	3UTR		0	0
hsa-miR-146a-3p	NM_031469	SH3BGRL2	(((((((...(((.((((((..&.)))))).)))))))))).	3934	3978	1	-22.4	1	0.0410729	0.485	0.133533	0.295744	-9.40695	16	19	10	3UTR		0	1
hsa-miR-146a-3p	NM_031895	CACNG8	((((((.((((((.((((((..&))))))..)))))))))))).	7385	7406	1	-20.8	1	0.00327198	0.382	0.48518	-0.188992	-6.3381	18	21	12	3UTR		0	0
hsa-miR-146a-3p	NM_031910	C1QTNF6	(((((....(((((((((((((&)))))))))).)))....))))).	2542	2566	1	-21.6	1	0.00176739	0.397	2.34304	3.3025	-10.7522	18	24	10	3UTR		0	0
hsa-miR-146a-3p	NM_031918	KLF16	(((((((..(((((((((....&.))))))))).))))))).	2431	2480	1	-21	1	3.9457e-05	0.279	0.0664954	0.425434	-7.3076	16	19	9	3UTR		0	0
hsa-miR-146a-3p	NM_031934	RAB34	.(((((((...(((((((((((&)))))))).)))))))))).	1385	1405	1	-20.9	1	0.0158307	0.382	0.689848	0.600956	-8.917	18	20	10	3UTR		0	0
hsa-miR-146a-3p	NM_031942	CDCA7	.((((((((((((((...((((&.)).))...)))))))))))))).	1802	1853	1	-19.9	1	0.00787	0.721	0.0324372	0.487562	-4.02637	18	24	14	3UTR		0	1
hsa-miR-146a-3p	NM_032175	UTP15	.(((((((((((((((((....&.)))).))))))))))))).	3613	3638	1	-16.9	1	0.00265469	0.676	0.31624	0.369474	-3.79332	17	20	13	3UTR		0	1
hsa-miR-146a-3p	NM_032199	ARID5B	((((((......((((((((..&)))))))))))))).	3870	3885	1	-17.2	1	0.0166459	0.529	1.71262	0.882688	-16.2654	14	15	14	3UTR		0	0
hsa-miR-146a-3p	NM_032242	PLXNA1	((.(((...(((((((((((..&)))))))))))...))).)).	6825	6846	1	-21.1	1	3.48229e-06	0.382	0.405205	0.377541	-10.4088	16	21	11	3UTR	MIRT038621	0	0
hsa-miR-146a-3p	NM_032286	MED10	(((((....(((((((((((..&.)))))))))))..))))).	615	645	1	-21.7	1	1.88614e-06	0.353	-0.531118	1.55849	-10.7522	16	20	11	3UTR		0	0
hsa-miR-146a-3p	NM_032291	SGIP1	.(((......(((((((((((.&))))))))))).....))).	2729	2749	1	-18.6	1	0.00663612	0.721	2.66819	2.58509	-15.9695	14	20	11	3UTR		0	0
hsa-miR-146a-3p	NM_032305	POLR3GL	.((((((..(((((((((((..&)))))))))))....)))))).	1032	1054	1	-21.5	1	0.00214024	0.544	-0.397898	0.020863	-7.16335	17	22	11	3UTR		0	0
hsa-miR-146a-3p	NM_032312	YIPF4	.((((....(((((.(((((((&))))))))))))...)))).	9925	9945	1	-17.4	1	0.00120347	0.441	-0.297457	0.0359443	-11.3434	16	20	12	3UTR		0	0
hsa-miR-146a-3p	NM_032321	C2orf88	((((((...(((((((((((((&))))))))))))))))))).	928	948	1	-26.4	1	0.000124699	0.574	0.366372	0.191109	-8.85129	19	20	19	3UTR		0	0
hsa-miR-146a-3p	NM_032341	DDI2	(((((((((..((((.......&))))..))))))))).	5121	5137	1	-18.6	1	7.56052e-05	0.544	0.547923	0.429673	-8.2379	13	16	9	3UTR		0	0
hsa-miR-146a-3p	NM_032345	PYM1	((((((...(((((((((((((&)))))))))))))........)))))).	1052	1080	1	-22.7	1	0.000650565	0.471	0.373691	2.31251	-8.85129	19	28	13	3UTR		0	0
hsa-miR-146a-3p	NM_032382	COG8	.((((((((((((.(((((...&.))))).)))))))))))).	4267	4313	1	-23.6	1	0.00998056	0.544	3.33893	4.07451	-4.65016	17	20	12	3UTR		0	0
hsa-miR-146a-3p	NM_032436	CHAMP1	..(((((((((.((((((.((.&)).))))))))))))))).	3095	3114	1	-17.8	1	0.000421318	0.721	1.37638	0.541435	-8.3038	17	19	15	3UTR		0	0
hsa-miR-146a-3p	NM_032440	LCOR	(((((....(((((.(((((..&))))))))))....))))).	6984	7004	1	-16.7	1	0.214215	0.529	0.776993	0.52005	-11.4877	15	20	10	3UTR		0	1
hsa-miR-146a-3p	NM_032463	LAT2	((((((...(((((((((((..&.)))))))))))...)))))).	1740	1792	1	-26	1	3.81606e-05	0.485	0.0467618	-0.231693	-8.85129	17	22	11	3UTR		0	0
hsa-miR-146a-3p	NM_032464	LAT2	((((((...(((((((((((..&.)))))))))))...)))))).	1810	1862	1	-26	1	3.81606e-05	0.485	0.0467618	-0.231693	-8.85129	17	22	11	3UTR		0	0
hsa-miR-146a-3p	NM_032486	DCTN5	.(((((((..((((((((((..&)))))).))))..))))))).	5026	5047	1	-22.2	1	0.00758055	0.588	0.297259	0.384212	-6.09222	17	21	7	3UTR		0	1
hsa-miR-146a-3p	NM_032486	DCTN5	((((((((((((((((.(((((&))))))))).))))))))).))).	10302	10326	1	-21.6	1	1.46579e-05	0.529	0.148918	-0.0488538	-3.93757	21	24	9	3UTR		0	1
hsa-miR-146a-3p	NM_032501	ACSS1	(((((((..((((((((((((.&))))))).).))))..))))))).	2643	2667	1	-21	1	0.0170957	0.632	4.36573	4.28124	-7.3076	19	24	7	3UTR		0	0
hsa-miR-146a-3p	NM_032523	OSBPL6	(((((.(((((((((((((.((&.)).)))))))))))))..))))).	6572	6615	1	-21.7	1	0.000150536	0.515	0.240466	0.233835	-5.83853	20	25	13	3UTR		0	0
hsa-miR-146a-3p	NM_032549	IMMP2L	..((((((((((((((((....&.)))))))))))))))).	1435	1472	1	-22.2	1	0.00200531	0.706	2.62709	2.89987	-4.957	16	18	16	3UTR		0	0
hsa-miR-146a-3p	NM_032557	USP38	(((((((......(((((((..&)))))))))))))).	4604	4619	1	-17.8	1	0.00879222	0.691	1.40553	1.16535	-16.0108	14	15	14	3UTR		0	0
hsa-miR-146a-3p	NM_032648	FAM167B	.(((((.((((((((((.((((&.)))))))))))))).)).))).	793	844	1	-20.6	1	0.000555796	0.515	-0.364649	0.0262887	-5.33701	19	23	14	3UTR		0	0
hsa-miR-146a-3p	NM_032693	NAA11	.((((((..((((((((((((.&))))))).)))))..)))))).	1714	1736	1	-23.8	1	0.00401622	0.603	2.69916	3.94954	-7.16335	18	22	7	3UTR		0	0
hsa-miR-146a-3p	NM_032717	GPAT3	((((((((((((((((.(((((&.))))))))))))..........))))))))).	2727	2775	1	-17.9	1	0.000275737	0.632	1.64707	0.4094	-3.93757	21	33	12	3UTR		0	0
hsa-miR-146a-3p	NM_032725	BUD13	(((((((((.(((((.......&))))).))))))))).	2089	2105	1	-19.1	1	9.83726e-05	0.485	0.320393	1.8337	-5.41313	14	16	9	3UTR		0	0
hsa-miR-146a-3p	NM_032786	ZC3H10	((((((.....(((((((((((&))))))))))).....)))))).	4764	4787	1	-20.5	1	0.00843619	0.574	0.580369	0.427742	-12.9186	17	23	11	3UTR		0	0
hsa-miR-146a-3p	NM_032883	TOX2	((((((....((((((((((((&)))))))))))).....................)))))).	1676	1716	1	-21.8	1	3.48914e-06	0.382	0.681117	1.00159	-10.0938	18	40	12	3UTR		0	0
hsa-miR-146a-3p	NM_033036	GAL3ST3	.((((((..(((((((((((..&)))))))))))....)))))).	2466	2488	1	-21.8	1	0.0037385	0.471	3.80182	3.19255	-7.16335	17	22	11	3UTR		0	0
hsa-miR-146a-3p	NM_033088	STRIP1	((((((((((((((........&.)))))))))))))).	2828	2876	1	-21.1	1	7.30559e-05	0.471	0.046873	0.0372802	-4.90607	14	16	14	3UTR		0	0
hsa-miR-146a-3p	NM_033117	RBM18	((((.....((((((((((((.&)))))))))))).........)))).	3097	3123	1	-18.9	1	0.0390933	0.676	0.0354956	0.0933599	-14.8713	16	26	12	3UTR		0	0
hsa-miR-146a-3p	NM_033127	SEC16B	((((((((..((((((......&))))))..)))))))).	4248	4265	1	-18.4	1	0.0150096	0.441	-0.115355	0.723425	-6.23647	14	17	8	3UTR		0	0
hsa-miR-146a-3p	NM_033136	FGF1	((.(((((..((((.((((((.&))))))..))))))))).)).	1514	1535	1	-18.4	1	0.00702323	0.485	0.649307	0.637364	-8.52946	17	21	9	3UTR		0	0
hsa-miR-146a-3p	NM_033201	BMERB1	(((((....((((((((((((.&)))).))))))))))))).	1006	1025	1	-18.2	1	1.84873e-06	0.441	0.845835	1.00725	-10.7522	17	19	13	3UTR		0	0
hsa-miR-146a-3p	NM_033255	EPSTI1	(((((((((.((((........&.)))).))))))))).	1656	1678	1	-19.8	1	8.56207e-06	0.588	0.0954228	0.484966	-6.14858	13	16	9	3UTR		0	0
hsa-miR-146a-3p	NM_033514	LIMS3	(((((((..((((((...((((&.)))).))))))))))))).	459	496	1	-20	1	0.000153893	0.426	-0.0956344	0.0266765	-7.54065	17	20	13	3UTR		0	0
hsa-miR-146a-3p	NM_033637	BTRC	((((((....((((((((((..&))))))))))...)))))).	2747	2767	1	-19.5	1	0.0164459	0.397	-0.151259	0.362149	-10.0938	16	20	10	3UTR		0	0
hsa-miR-146a-3p	NM_033642	FGF13	((((((..(((((((((((((.&)))))))))))))..)))))).	17539	17561	1	-23.1	1	0.00155906	0.471	2.45888	2.74932	-7.7949	19	22	13	3UTR		0	0
hsa-miR-146a-3p	NM_052875	VPS26B	(((((....(((((((((....&.)))))))))...))))).	2959	2983	1	-17.9	1	0.00307411	0.412	0.0928533	-0.0289368	-10.7522	14	19	9	3UTR		0	0
hsa-miR-146a-3p	NM_052879	LARP4	(((((((((((((.........&.))))))))))))).	3068	3104	1	-19	1	0.000780651	0.544	0.491891	0.282274	-5.76291	13	15	13	3UTR		0	1
hsa-miR-146a-3p	NM_052901	SLC25A25	(((((....((((((((((...&))))))))))..))))).	2997	3015	1	-18.2	1	0.00245622	0.324	0.77488	0.228124	-10.7522	15	18	10	3UTR		0	0
hsa-miR-146a-3p	NM_052925	LENG8	(((((..(((((.(((((((..&))))))).)))))..))))).	2766	2787	1	-19.8	1	0.114374	0.441	0.591336	1.09073	-8.67135	17	21	7	3UTR		0	0
hsa-miR-146a-3p	NM_052950	WDFY2	(((..(((((..((((((((((&))))))))))...)))))..))).	2899	2923	1	-20.7	1	0.000195984	0.662	0.0849	0.251937	-17.2602	18	24	10	3UTR		0	0
hsa-miR-146a-3p	NM_053279	FAM167A	(((((((....((.((((((((&.)))))))).))))))))).	1195	1233	1	-21.4	1	0.0635802	0.368	-0.471273	-0.246043	-12.2317	17	20	9	3UTR		0	0
hsa-miR-146a-3p	NM_053279	FAM167A	(((((((....((.((((((((&)))))))).))))))))).	1214	1233	1	-21.2	1	0.0635802	0.368	-0.304436	-0.274776	-12.2317	17	19	9	3UTR		0	0
hsa-miR-146a-3p	NM_058163	TSR2	(((((...(((((((((((((.&)))))))))))))))))).	1823	1842	1	-21.6	1	0.000590644	0.441	0.268031	0.728758	-9.69585	18	19	18	3UTR		0	0
hsa-miR-146a-3p	NM_058219	EXOSC6	(((((((..((((((((((((.&))))))))))))...))))).)).	5007	5031	1	-24.9	1	0.000840262	0.559	2.52139	1.2051	-7.3076	19	24	12	3UTR		0	0
hsa-miR-146a-3p	NM_078488	VNN2	.(((((((((((....((((..&))))....))))))))))).	1823	1843	1	-18.7	1	7.29912e-05	0.5	1.65724	0.668311	-6.90779	15	20	11	3UTR		0	0
hsa-miR-146a-3p	NM_080668	CDCA5	(((.((((((((((((((.(((&))).)))).)))))))))).))).	1401	1425	1	-19.2	1	0.0208158	0.485	0.106561	-0.38211	-6.9696	20	24	10	3UTR		0	0
hsa-miR-146a-3p	NM_080820	DTD1	(((((....(((((((((....&.)))))))))......))))).	734	761	1	-17.9	1	0.106095	0.662	0.984135	0.942889	-10.7522	14	22	9	3UTR		0	0
hsa-miR-146a-3p	NM_080872	UNC5D	((((((...(((((((((((((&))))))))))))).....)))))).	8768	8793	1	-26.6	1	0.00351291	0.529	2.30518	2.20652	-8.85129	19	25	13	3UTR		0	0
hsa-miR-146a-3p	NM_130446	KLHL6	(((((....(((((.(((((..&))))))))))...))))).	2612	2631	1	-18.8	1	0.00173524	0.456	0.614249	0.45317	-11.4877	15	19	10	3UTR		0	0
hsa-miR-146a-3p	NM_130773	CNTNAP5	(((((((((((.(((.......&))).))))))))))).	5548	5564	1	-17.9	1	0.00036525	0.559	-0.041714	-0.436636	-7.51743	14	16	11	3UTR		0	0
[truncated: 82,243 more rows]
